# Supplementary material for: Structures and relative stabilities of ammonia clusters at different temperatures: DFT vs. ab initio
Source: Royal Society of Chemistry journal article supplement (doi:10.1039/c5cp03374h), 2015-01-01
Supplement: c5cp03374h1.pdf [file c5cp03374h1.pdf]

# Structures and Relative Stabilities of Ammonia Clusters at Different Temperatures: DFT Vs Ab-Initio

(Supporting Information)

Alhadji Malloum<sup>a</sup>, Jean Jules Fifen<sup>a,\*</sup>, Zoubeida Dhaouadi<sup>b</sup>, Serge Guy Nana Engo<sup>a</sup>,  
and Nejm-Eddine Jaidane<sup>b</sup>

<sup>a</sup> Department of Physics, Faculty of Science, The University of Ngaoundere, 454, Ngaoundere,  
Cameroon.

Laboratoire de Spectroscopie Atomique Moléculaire et Applications, Faculté des Sciences de Tunis  
El Manar, Campus Universitaire 1060, Tunis, Tunisie.

Corresponding author: [julesfifen@gmail.com](mailto:julesfifen@gmail.com)

## Contents

**Fig.1=Fig. S1:** The MP2/6-31++G(d,p) optimized isomers of ammonia clusters  $(\text{NH}_3)_{n=5-10}$  that were not located at the M06-2X/6-31++G(d,p) level of theory. Numbers in blue color represent the zero-point corrected electronic energy differences (in kcal/mol) of the corresponding isomers from the global minimum energy structure for given n. The symmetry point group of each structure is indicated in green color when it is different from the  $C_1$  symmetry point group.....**P 0**

**Fig.2=Fig. S2:** Comparison of the experimental IR for the ammonia decamer with the Calculated scaled harmonic IR spectra of some of its various isomers (10\_4 – 10\_12).

**Fig.3=Fig. S3:** Comparison of the experimental IR for the ammonia pentamer with the Calculated scaled harmonic IR spectra of all the isomers with n = 6-9 and that have different hydrogen bond types than those already exhibited by the isomers of pentamer ammonia.

**Fig.4=Fig. S4:** Comparison of the experimental IR for the ammonia decamer with the Calculated scaled harmonic IR spectra of some of its various isomers (10\_13 – 10\_22).

**Fig.5=Fig. S5:** Comparison of the experimental IR for the ammonia decamer with the Calculated scaled harmonic IR spectra of some of its various isomers (10\_23 – 10\_32).

Cartesian coordinates for all the isomers of ammonia clusters  $(\text{NH}_3)_{n=5-10}$  at M06-2X/6-31++G(d,p) level of theory ..... **P 1-84**

Cartesian coordinates for all the isomers of ammonia clusters  $(\text{NH}_3)_{n=5-10}$  at MP2/6-31++G(d,p) level of theory .....**P 85-179**

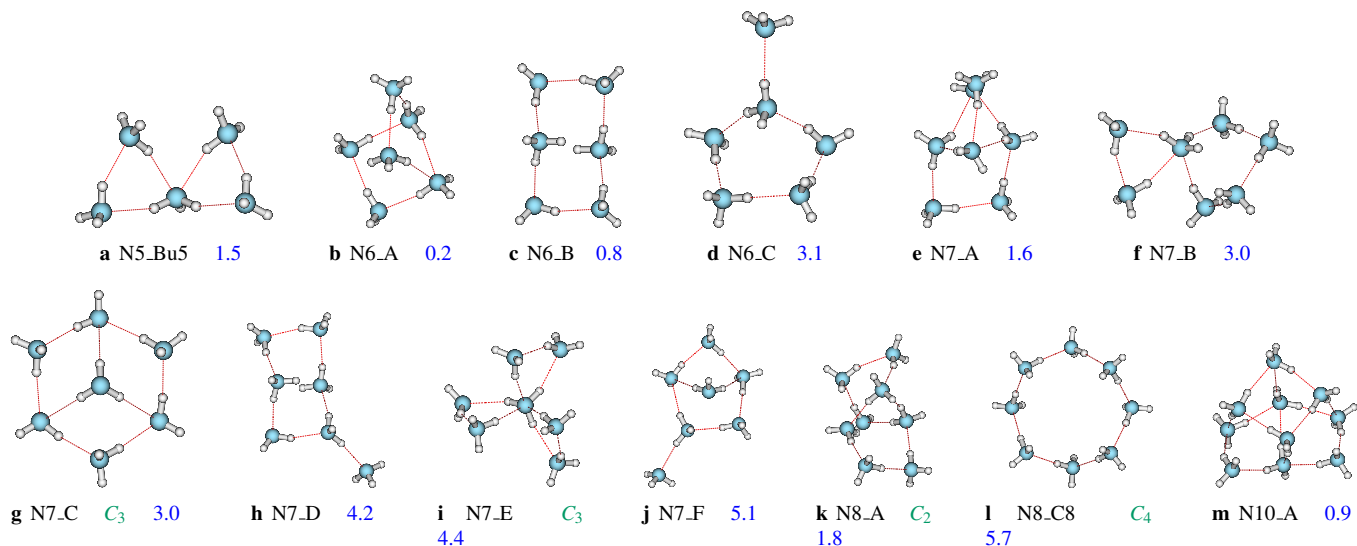

**Fig. 1** The MP2/6-31++g(d,p) Optimized isomers of ammonia clusters ( $NH_3$ ) $_{n=5-10}$  that were not located at the M06-2X/6-31++g(d,p) level of theory. Numbers in blue color represent the zero-point corrected electronic energy differences (in kcal/mol) of the corresponding isomers from the global minimum energy structure for given  $n$ . The symmetry point group of each structure is indicated in green color when it is different from the  $C_1$  symmetry point group.

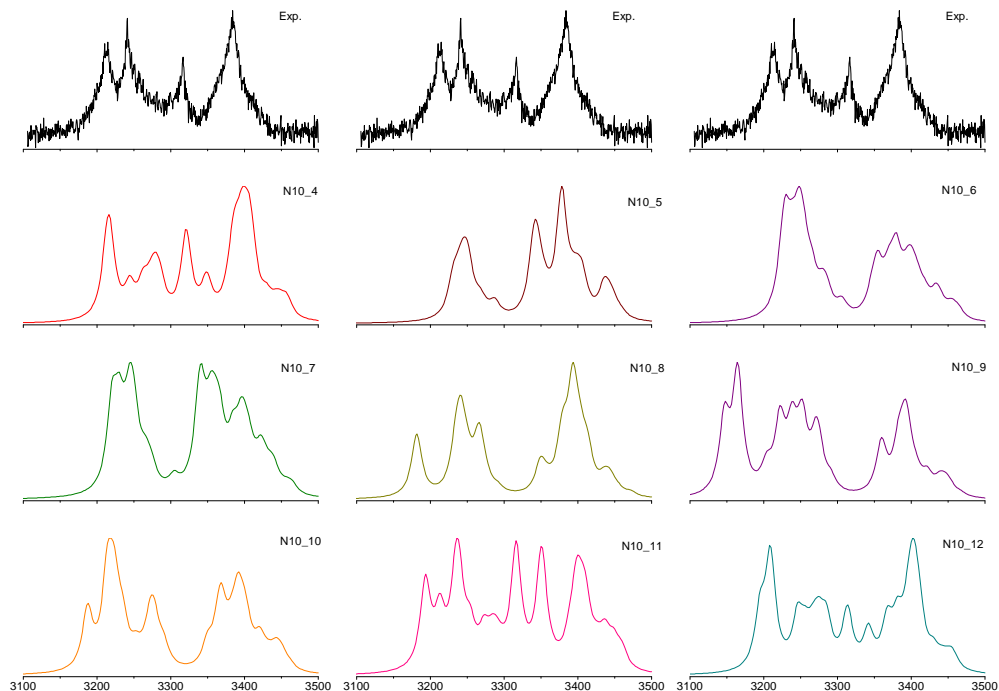

**Fig. 2** Comparison of the experimental IR for the ammonia decamer with the Calculated scaled harmonic IR spectra of some of its various isomers (10.4 - 10.12). The calculated IR spectra were performed at the M062X/6-31++G(d,p) level of theory with the scaling factor of 0.948. Experimental data courtesy of Mikhail N. Slipchenko.

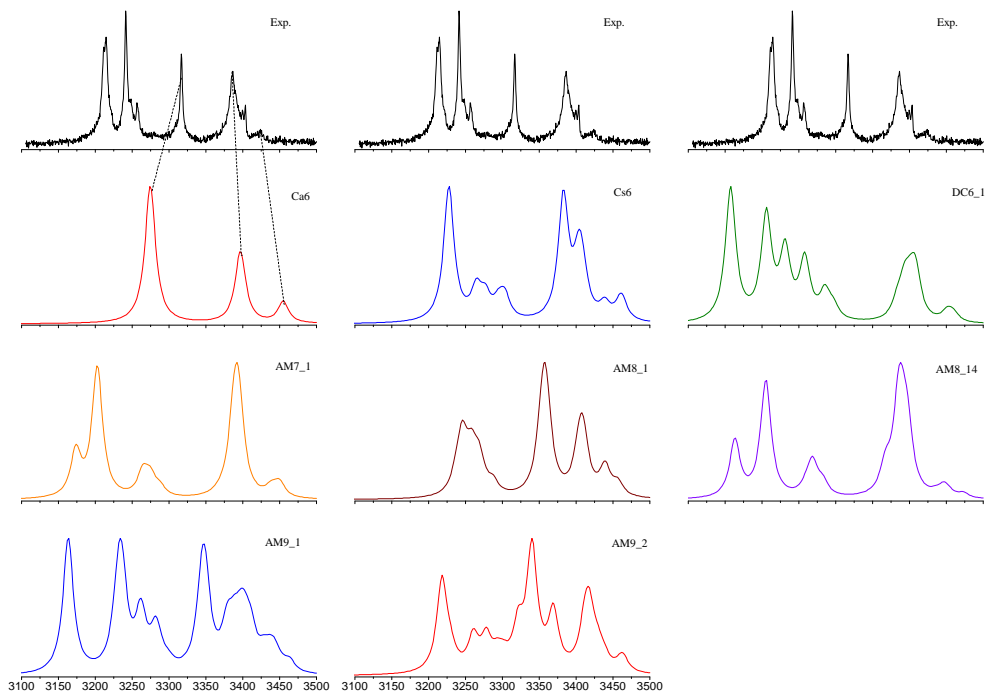

**Fig. 3** Comparison of the experimental IR for the ammonia pentamer with the Calculated scaled harmonic IR spectra of all the isomers with  $n = 6 - 9$  and that have different hydrogen bond types than those already exhibited by the isomers of pentamer ammonia. The calculated IR spectra were performed at the M062X/6-31++G(d,p) level of theory with the scaling factor of 0.948. Experimental data courtesy of Mikhail N. Slipchenko.

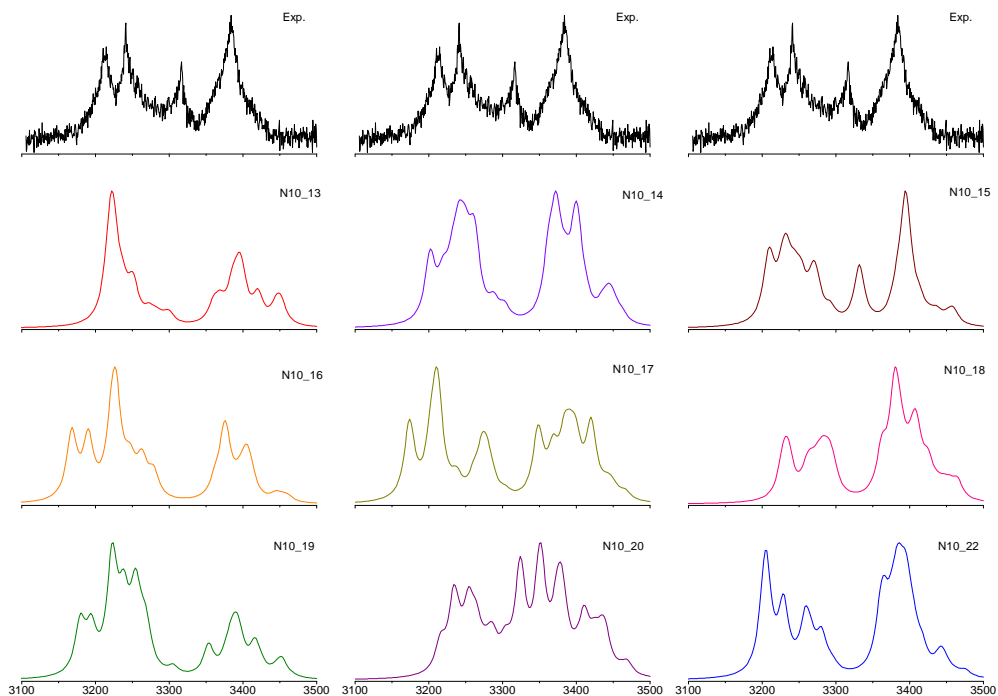

**Fig. 4** Comparison of the experimental IR for the ammonia decamer with the Calculated scaled harmonic IR spectra of some of its various isomers (10.13 - 10.22). The calculated IR spectra were performed at the M062X/6-31++G(d,p) level of theory with the scaling factor of 0.948. Experimental data courtesy of Mikhail N. Slipchenko.

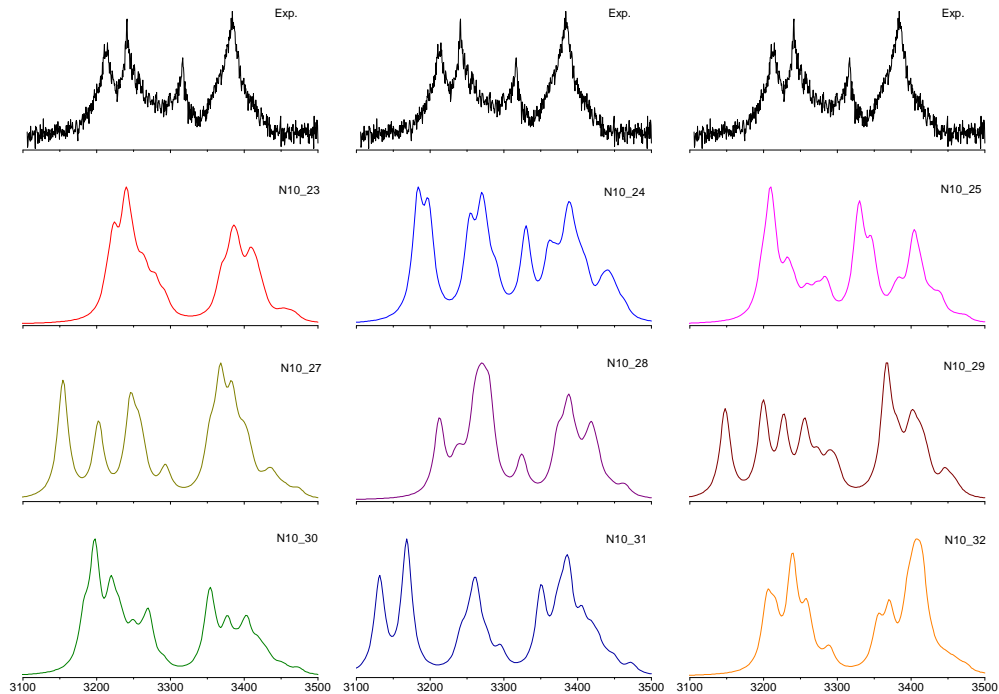

**Fig. 5** Comparison of the experimental IR for the ammonia decamer with the Calculated scaled harmonic IR spectra of some of its various isomers (10-23 - 10-32). The calculated IR spectra were performed at the M062X/6-31++G(d,p) level of theory with the scaling factor of 0.948. Experimental data courtesy of Mikhail N. Slipchenko.

Cartesian coordinates of all the proposed isomers of ammonia clusters (NH<sub>3</sub>)<sub>n</sub>=2-10 at M06-2X/6-31++G(d,p) level of theory

Cartesian coordinates of ammonia dimer: (NH<sub>3</sub>)<sub>2</sub>

Cartesian coordinates of : L2

-----  
Atomic number (AN) and Cartesian coordinates

| AN | X         | Y         | Z         |
|----|-----------|-----------|-----------|
| 7  | 1.532828  | 0.000000  | -0.036650 |
| 1  | 1.460179  | -0.000002 | 0.976177  |
| 1  | 2.067569  | -0.818490 | -0.307694 |
| 1  | 2.067568  | 0.818493  | -0.307691 |
| 7  | -1.639027 | 0.000000  | 0.097840  |
| 1  | -0.664789 | 0.000000  | -0.202499 |
| 1  | -2.093566 | -0.817937 | -0.293310 |
| 1  | -2.093566 | 0.817937  | -0.293310 |

-----

Cartesian coordinates of : CY2

-----  
Atomic number (AN) and Cartesian coordinates

| AN | X         | Y         | Z         |
|----|-----------|-----------|-----------|
| 7  | 1.528693  | 0.000000  | 0.071602  |
| 1  | 0.824301  | 0.000000  | -0.662480 |
| 1  | 2.115410  | 0.818125  | -0.052028 |
| 1  | 2.115410  | -0.818126 | -0.052028 |
| 7  | -1.528694 | 0.000000  | -0.071602 |
| 1  | -0.824299 | 0.000000  | 0.662478  |
| 1  | -2.115410 | 0.818126  | 0.052030  |
| 1  | -2.115410 | -0.818126 | 0.052030  |

-----

Cartesian coordinates of ammonia trimer: (NH<sub>3</sub>)<sub>3</sub>

Cartesian coordinates of : CY3

-----  
Atomic number (AN) and Cartesian coordinates

| AN | X         | Y         | Z         |
|----|-----------|-----------|-----------|
| 7  | -1.775767 | -0.274740 | 0.000001  |
| 1  | -2.345702 | -0.472846 | -0.816085 |
| 1  | -2.345728 | -0.472846 | 0.816069  |
| 1  | -0.984287 | -0.924159 | 0.000013  |
| 7  | 1.125813  | -1.400425 | 0.000002  |
| 1  | 1.292056  | -0.390206 | 0.000008  |
| 1  | 1.582611  | -1.794704 | -0.816047 |
| 1  | 1.582654  | -1.794721 | 0.816018  |
| 7  | 0.649930  | 1.675106  | 0.000000  |
| 1  | 0.763398  | 2.267747  | 0.816063  |
| 1  | -0.308228 | 1.314405  | 0.000004  |
| 1  | 0.763393  | 2.267741  | -0.816068 |

-----

Cartesian coordinates of : Asym

-----  
Atomic number (AN) and Cartesian coordinates

| AN | X        | Y         | Z         |
|----|----------|-----------|-----------|
| 7  | 1.932289 | -0.828088 | 0.000000  |
| 1  | 1.399530 | 0.042963  | 0.000000  |
| 1  | 1.712581 | -1.370841 | -0.826460 |
| 1  | 1.712581 | -1.370840 | 0.826460  |
| 7  | 0.016920 | 1.709171  | 0.000000  |

|   |           |           |           |
|---|-----------|-----------|-----------|
| 1 | 0.041103  | 2.311078  | 0.816623  |
| 1 | 0.041102  | 2.311078  | -0.816623 |
| 1 | -0.868399 | 1.201970  | 0.000000  |
| 7 | -1.773762 | -0.819238 | 0.000000  |
| 1 | -2.229615 | -1.210234 | 0.817953  |
| 1 | -2.229614 | -1.210232 | -0.817954 |
| 1 | -0.807390 | -1.137860 | 0.000000  |

-----

Cartesian coordinates of : L3

-----

Atomic number (AN) and Cartesian coordinates

| AN | X         | Y         | Z         |
|----|-----------|-----------|-----------|
| 7  | -2.608510 | -0.548585 | -0.014454 |
| 1  | -3.262696 | -0.451315 | 0.755126  |
| 1  | -2.205125 | -1.478343 | 0.042807  |
| 1  | -3.142720 | -0.501037 | -0.875950 |
| 7  | 0.082019  | 1.171624  | 0.005390  |
| 1  | 0.205312  | 1.639451  | 0.897989  |
| 1  | -0.834100 | 0.720349  | 0.010146  |
| 1  | 0.070619  | 1.892473  | -0.708988 |
| 7  | 2.747246  | -0.573378 | 0.071906  |
| 1  | 3.223535  | -0.561625 | -0.823460 |
| 1  | 1.865661  | -0.067001 | -0.028406 |
| 1  | 2.534227  | -1.540575 | 0.290841  |

-----

Cartesian coordinates of ammonia tetramer: (NH3)4

Cartesian coordinates of : CY4

-----

Atomic number (AN) and Cartesian coordinates

| AN | X         | Y         | Z         |
|----|-----------|-----------|-----------|
| 7  | -0.153123 | 2.196951  | 0.002461  |
| 1  | -0.109140 | 2.798622  | 0.819179  |
| 1  | -0.108689 | 2.803252  | -0.810798 |
| 1  | 0.690447  | 1.612349  | 0.001045  |
| 7  | 2.196951  | 0.153123  | -0.002461 |
| 1  | 1.612349  | -0.690446 | -0.001045 |
| 1  | 2.803253  | 0.108689  | 0.810798  |
| 1  | 2.798622  | 0.109139  | -0.819180 |
| 7  | 0.153123  | -2.196951 | 0.002461  |
| 1  | 0.108689  | -2.803252 | -0.810798 |
| 1  | -0.690447 | -1.612349 | 0.001045  |
| 1  | 0.109140  | -2.798623 | 0.819179  |
| 7  | -2.196951 | -0.153123 | -0.002461 |
| 1  | -2.798623 | -0.109139 | -0.819179 |
| 1  | -1.612349 | 0.690446  | -0.001045 |
| 1  | -2.803253 | -0.108689 | 0.810798  |

-----

Cartesian coordinates of : P4

-----

Atomic number (AN) and Cartesian coordinates

| AN | X         | Y         | Z         |
|----|-----------|-----------|-----------|
| 7  | 1.625433  | 0.539004  | -0.904715 |
| 1  | 2.314587  | 1.270887  | -0.759476 |
| 1  | 1.984641  | -0.051360 | -1.649548 |
| 1  | 1.583630  | -0.031394 | -0.052548 |
| 7  | 0.542825  | -1.067676 | 1.449492  |
| 1  | 0.114959  | -1.714142 | 0.787270  |
| 1  | -0.171692 | -0.367957 | 1.644818  |
| 1  | 0.749228  | -1.567380 | 2.307621  |
| 7  | -1.156225 | -1.145314 | -1.054614 |
| 1  | -1.774061 | -1.453597 | -1.797576 |

|   |           |           |           |
|---|-----------|-----------|-----------|
| 1 | -0.452347 | -0.529079 | -1.456146 |
| 1 | -1.691956 | -0.571681 | -0.406713 |
| 7 | -1.011436 | 1.576103  | 0.536107  |
| 1 | -1.742222 | 2.075132  | 0.037835  |
| 1 | -0.233707 | 1.430887  | -0.112114 |
| 1 | -0.685240 | 2.194859  | 1.272685  |

-----

Cartesian coordinates of : BC4\_1

-----

Atomic number (AN) and Cartesian coordinates

| AN | X         | Y         | Z         |
|----|-----------|-----------|-----------|
| 7  | -2.750749 | -0.287466 | 0.012130  |
| 1  | -2.253338 | 0.606462  | 0.016113  |
| 1  | -3.344587 | -0.322086 | 0.834465  |
| 1  | -3.362269 | -0.305249 | -0.797685 |
| 7  | -0.388546 | 1.719226  | -0.001954 |
| 1  | -0.083843 | 2.216842  | -0.832565 |
| 1  | 0.075683  | 0.809329  | 0.005676  |
| 1  | -0.053792 | 2.245246  | 0.799012  |
| 7  | 0.145255  | -1.427771 | -0.014894 |
| 1  | 0.384699  | -1.957154 | -0.848693 |
| 1  | -0.871912 | -1.297294 | -0.011643 |
| 1  | 0.380322  | -2.019605 | 0.777024  |
| 7  | 3.071355  | -0.086711 | -0.009396 |
| 1  | 3.195050  | 0.612357  | -0.733668 |
| 1  | 3.304202  | 0.344640  | 0.878453  |
| 1  | 2.088583  | -0.354440 | 0.012311  |

-----

Cartesian coordinates of : BC4\_2

-----

Atomic number (AN) and Cartesian coordinates

| AN | X         | Y         | Z         |
|----|-----------|-----------|-----------|
| 7  | -1.950001 | -1.581048 | -0.240438 |
| 1  | -1.949329 | -2.061492 | -1.134332 |
| 1  | -2.193692 | -0.600832 | -0.407263 |
| 1  | -2.687342 | -1.996262 | 0.319901  |
| 7  | 0.436415  | 0.080516  | 1.022633  |
| 1  | 1.371501  | 0.003988  | 0.621721  |
| 1  | -0.112168 | -0.727731 | 0.722086  |
| 1  | 0.533856  | 0.026786  | 2.031620  |
| 7  | 3.341115  | -0.049482 | -0.413085 |
| 1  | 4.109356  | -0.509983 | 0.063461  |
| 1  | 3.628425  | 0.903159  | -0.611895 |
| 1  | 3.204705  | -0.520874 | -1.301320 |
| 7  | -1.923443 | 1.541277  | -0.316825 |
| 1  | -1.703106 | 2.100595  | -1.134540 |
| 1  | -1.045415 | 1.322204  | 0.166900  |
| 1  | -2.485397 | 2.121599  | 0.297669  |

-----

Cartesian coordinates of : BC4\_3

-----

Atomic number (AN) and Cartesian coordinates

| AN | X         | Y         | Z         |
|----|-----------|-----------|-----------|
| 7  | -1.348045 | -1.674750 | 0.057890  |
| 1  | -1.512745 | -2.293101 | 0.845519  |
| 1  | -1.247039 | -2.259474 | -0.765456 |
| 1  | -2.172677 | -1.085634 | -0.065972 |
| 7  | -3.067918 | 0.906941  | -0.198629 |
| 1  | -3.333354 | 1.251498  | -1.115643 |
| 1  | -2.172467 | 1.325234  | 0.038909  |
| 1  | -3.754575 | 1.250555  | 0.464872  |
| 7  | 0.780509  | 0.633116  | 0.372401  |
| 1  | 0.537753  | 1.152133  | 1.209412  |

|   |          |           |           |
|---|----------|-----------|-----------|
| 1 | 0.149448 | -0.168023 | 0.287060  |
| 1 | 0.650643 | 1.242707  | -0.428457 |
| 7 | 3.848082 | 0.116090  | -0.296845 |
| 1 | 4.464773 | 0.370027  | 0.467535  |
| 1 | 4.017641 | -0.860948 | -0.510794 |
| 1 | 2.884201 | 0.205250  | 0.029294  |

-----

Cartesian coordinates of ammonia pentamer: (NH3)<sub>5</sub>

Cartesian coordinates of : P5\_1

-----

Atomic number (AN) and Cartesian coordinates

| AN | X         | Y         | Z         |
|----|-----------|-----------|-----------|
| 7  | 2.201330  | 0.691937  | 0.186480  |
| 1  | 2.921346  | 1.101644  | 0.773468  |
| 1  | 1.349417  | 1.251646  | 0.292330  |
| 1  | 2.511584  | 0.788730  | -0.775828 |
| 7  | -0.396593 | -0.074497 | -1.884331 |
| 1  | -0.023320 | -0.829212 | -1.310145 |
| 1  | -0.194229 | 0.789584  | -1.386440 |
| 1  | 0.112349  | -0.061671 | -2.761902 |
| 7  | 0.800160  | -2.041160 | 0.563738  |
| 1  | 1.261561  | -2.770056 | 0.027337  |
| 1  | 0.768427  | -2.367343 | 1.525502  |
| 1  | 1.399387  | -1.208242 | 0.540393  |
| 7  | -0.617044 | 2.042757  | 0.607511  |
| 1  | -1.193856 | 1.202787  | 0.746578  |
| 1  | -1.154796 | 2.679047  | 0.025221  |
| 1  | -0.516904 | 2.497701  | 1.510598  |
| 7  | -2.094581 | -0.642579 | 0.494413  |
| 1  | -1.302799 | -1.284342 | 0.566710  |
| 1  | -2.295529 | -0.560701 | -0.500302 |
| 1  | -2.895544 | -1.064782 | 0.951805  |

-----

Cartesian coordinates of : P5\_2

-----

Atomic number (AN) and Cartesian coordinates

| AN | X         | Y         | Z         |
|----|-----------|-----------|-----------|
| 7  | 2.215217  | -0.455281 | 1.083633  |
| 1  | 2.845261  | -1.248274 | 1.156403  |
| 1  | 2.695718  | 0.343302  | 1.487661  |
| 1  | 2.073626  | -0.258740 | 0.091053  |
| 7  | -0.334972 | -1.749252 | -0.217807 |
| 1  | -0.333796 | -2.741006 | -0.434517 |
| 1  | 0.169857  | -1.622679 | 0.657940  |
| 1  | 0.229942  | -1.272901 | -0.920849 |
| 7  | -0.239863 | 1.556157  | 0.801170  |
| 1  | -0.254819 | 2.395596  | 1.371593  |
| 1  | 0.217073  | 0.822549  | 1.340995  |
| 1  | -1.208967 | 1.261875  | 0.651208  |
| 7  | 1.157503  | 0.654515  | -1.747987 |
| 1  | 0.533061  | 0.561794  | -2.544274 |
| 1  | 1.942102  | 1.217874  | -2.062719 |
| 1  | 0.657687  | 1.185013  | -1.022171 |
| 7  | -2.867518 | 0.023662  | 0.112993  |
| 1  | -2.168221 | -0.706371 | -0.056309 |
| 1  | -3.386720 | 0.173654  | -0.745812 |
| 1  | -3.524375 | -0.320293 | 0.805781  |

-----

Cartesian coordinates of : DC5

-----

Atomic number (AN) and Cartesian coordinates



| AN | X         | Y         | Z         |
|----|-----------|-----------|-----------|
| 7  | -0.088158 | 1.181347  | 1.234911  |
| 1  | -0.127688 | 0.163973  | 1.250786  |
| 1  | -0.087151 | 1.503234  | 2.197671  |
| 1  | 0.817265  | 1.422442  | 0.823104  |
| 7  | 2.593528  | 1.116016  | -0.340551 |
| 1  | 2.324695  | 0.129457  | -0.409667 |
| 1  | 3.535879  | 1.163035  | 0.032830  |
| 1  | 2.621660  | 1.503472  | -1.278029 |
| 7  | 1.443957  | -1.805813 | -0.306005 |
| 1  | 1.540313  | -2.313053 | -1.180731 |
| 1  | 0.442140  | -1.747871 | -0.096321 |
| 1  | 1.868593  | -2.382909 | 0.414039  |
| 7  | -2.309956 | 1.194501  | -0.875353 |
| 1  | -3.160909 | 1.719046  | -0.700428 |
| 1  | -1.965071 | 1.479296  | -1.786519 |
| 1  | -1.611766 | 1.467590  | -0.174640 |
| 7  | -1.653016 | -1.596907 | 0.292423  |
| 1  | -2.043856 | -1.543433 | 1.229171  |
| 1  | -2.066895 | -2.416270 | -0.143114 |
| 1  | -1.991688 | -0.772023 | -0.216134 |

Cartesian coordinates of : BC5\_1

Atomic number (AN) and Cartesian coordinates

| AN | X         | Y         | Z         |
|----|-----------|-----------|-----------|
| 7  | 0.326460  | 1.628638  | 0.338822  |
| 1  | 0.523196  | 1.818625  | 1.316967  |
| 1  | 0.963523  | 2.202172  | -0.205712 |
| 1  | 0.569441  | 0.649829  | 0.163698  |
| 7  | 0.904726  | -1.455940 | -0.181040 |
| 1  | -0.099671 | -1.622917 | -0.040573 |
| 1  | 1.408413  | -2.036201 | 0.484682  |
| 1  | 1.140654  | -1.811392 | -1.103613 |
| 7  | -2.163813 | -1.683977 | 0.234581  |
| 1  | -2.682385 | -2.296897 | -0.387215 |
| 1  | -2.464252 | -0.721633 | 0.043521  |
| 1  | -2.457155 | -1.911758 | 1.179821  |
| 7  | -2.701405 | 1.330484  | -0.320223 |
| 1  | -2.909339 | 1.600792  | -1.276434 |
| 1  | -1.728827 | 1.590340  | -0.125776 |
| 1  | -3.300792 | 1.886959  | 0.281054  |
| 7  | 3.707389  | 0.104478  | -0.060514 |
| 1  | 3.986525  | 0.507121  | -0.948593 |
| 1  | 3.816925  | 0.818707  | 0.651249  |
| 1  | 2.720245  | -0.139541 | -0.114452 |

Cartesian coordinates of : BC5\_2

Atomic number (AN) and Cartesian coordinates

| AN | X         | Y         | Z         |
|----|-----------|-----------|-----------|
| 7  | -1.065498 | -0.046907 | 1.189814  |
| 1  | -1.353121 | 0.030272  | 2.160482  |
| 1  | -1.910445 | -0.003359 | 0.619427  |
| 1  | -0.493874 | 0.774606  | 0.973458  |
| 7  | 1.025972  | 2.206957  | 0.405400  |
| 1  | 1.641242  | 1.562043  | -0.101874 |
| 1  | 1.558426  | 2.595985  | 1.177383  |
| 1  | 0.803611  | 2.977662  | -0.216732 |
| 7  | 2.708894  | -0.005659 | -1.029516 |
| 1  | 2.626681  | -0.076884 | -2.039019 |
| 1  | 2.203410  | -0.800158 | -0.620253 |
| 1  | 3.693045  | -0.119032 | -0.806991 |
| 7  | 0.992662  | -2.187803 | 0.368724  |
| 1  | 0.552810  | -2.942365 | -0.149169 |

|   |           |           |           |
|---|-----------|-----------|-----------|
| 1 | 0.249309  | -1.547772 | 0.679978  |
| 1 | 1.402924  | -2.604601 | 1.199025  |
| 7 | -3.589245 | 0.036472  | -0.857926 |
| 1 | -4.137407 | 0.890136  | -0.848787 |
| 1 | -4.234504 | -0.744993 | -0.810450 |
| 1 | -3.111605 | -0.012953 | -1.751946 |

-----

Cartesian coordinates of : BC5\_3

-----

Atomic number (AN) and Cartesian coordinates

| AN | X         | Y         | Z         |
|----|-----------|-----------|-----------|
| 7  | -0.943507 | 1.841536  | 0.093913  |
| 1  | -1.204486 | 2.102166  | 1.039469  |
| 1  | -1.207372 | 0.864588  | -0.043632 |
| 1  | -1.505549 | 2.405079  | -0.536206 |
| 7  | 1.573709  | 0.325111  | -1.047428 |
| 1  | 2.390655  | 0.136004  | -0.465464 |
| 1  | 1.059109  | 1.107238  | -0.639586 |
| 1  | 1.911562  | 0.620541  | -1.957934 |
| 7  | 4.080000  | -0.393267 | 0.864976  |
| 1  | 4.841790  | 0.276707  | 0.886180  |
| 1  | 4.471300  | -1.295264 | 0.613863  |
| 1  | 3.715015  | -0.470883 | 1.808763  |
| 7  | -1.028864 | -1.273216 | -0.687712 |
| 1  | -0.927848 | -2.111283 | -0.121888 |
| 1  | -0.083993 | -0.925894 | -0.897239 |
| 1  | -1.449441 | -1.568836 | -1.564357 |
| 7  | -3.841995 | -0.548352 | 0.705013  |
| 1  | -2.911798 | -0.660663 | 0.303003  |
| 1  | -3.744731 | -0.466377 | 1.711338  |
| 1  | -4.229604 | 0.324194  | 0.362350  |

-----

Cartesian coordinates of : BC5\_4

-----

Atomic number (AN) and Cartesian coordinates

| AN | X         | Y         | Z         |
|----|-----------|-----------|-----------|
| 7  | -1.720862 | 1.439148  | 0.034429  |
| 1  | -0.813456 | 1.914139  | 0.006801  |
| 1  | -2.221298 | 1.779052  | 0.850849  |
| 1  | -2.255243 | 1.740317  | -0.775823 |
| 7  | 1.328665  | 2.024208  | -0.023827 |
| 1  | 1.826092  | 2.358792  | -0.842948 |
| 1  | 1.375058  | 1.004427  | -0.023184 |
| 1  | 1.835046  | 2.359581  | 0.789467  |
| 7  | 0.329355  | -0.988352 | -0.077161 |
| 1  | 0.260612  | -1.505375 | -0.949466 |
| 1  | -0.481022 | -0.366123 | -0.024596 |
| 1  | 0.237268  | -1.672142 | 0.669103  |
| 7  | 3.520958  | -1.337158 | 0.052480  |
| 1  | 4.007760  | -0.906855 | -0.726109 |
| 1  | 3.940356  | -0.992034 | 0.908802  |
| 1  | 2.547180  | -1.040108 | 0.027788  |
| 7  | -3.540404 | -1.217336 | -0.007533 |
| 1  | -2.799146 | -0.521429 | 0.046404  |
| 1  | -3.275137 | -1.912629 | -0.696571 |
| 1  | -3.608056 | -1.683183 | 0.890765  |

-----

Cartesian coordinates of : BC5\_5

-----

Atomic number (AN) and Cartesian coordinates

| AN | X        | Y         | Z        |
|----|----------|-----------|----------|
| 7  | 1.588786 | 0.606054  | 0.872177 |
| 1  | 2.269813 | -0.038507 | 0.471544 |

|   |           |           |           |
|---|-----------|-----------|-----------|
| 1 | 2.047126  | 1.092847  | 1.636145  |
| 1 | 1.346047  | 1.305120  | 0.167421  |
| 7 | -0.134829 | 2.553221  | -0.961869 |
| 1 | -0.817281 | 1.990701  | -0.442241 |
| 1 | -0.328364 | 2.448493  | -1.952560 |
| 1 | -0.289989 | 3.528997  | -0.729742 |
| 7 | -1.550929 | 0.532213  | 0.909113  |
| 1 | -1.939264 | 0.823727  | 1.800650  |
| 1 | -0.573136 | 0.275324  | 1.069410  |
| 1 | -2.066899 | -0.294917 | 0.610118  |
| 7 | 3.503908  | -1.699044 | -0.382963 |
| 1 | 4.473348  | -1.825563 | -0.112527 |
| 1 | 3.467970  | -1.667735 | -1.396385 |
| 1 | 2.987693  | -2.518236 | -0.079665 |
| 7 | -3.378060 | -1.844498 | -0.346107 |
| 1 | -4.030096 | -1.274720 | -0.875144 |
| 1 | -3.918279 | -2.498527 | 0.210171  |
| 1 | -2.830824 | -2.382623 | -1.009652 |

-----

Cartesian coordinates of ammonia hexamer: (NH<sub>3</sub>)<sub>6</sub>

Cartesian coordinates of : Ca6

-----

Atomic number (AN) and Cartesian coordinates

| AN | X         | Y         | Z         |
|----|-----------|-----------|-----------|
| 7  | -1.223605 | 1.226693  | 1.441171  |
| 1  | -1.394542 | 1.353944  | 0.440591  |
| 1  | -0.298637 | 1.614109  | 1.613449  |
| 1  | -1.894678 | 1.790304  | 1.953516  |
| 7  | 1.223605  | -1.226693 | -1.441171 |
| 1  | 1.894678  | -1.790304 | -1.953516 |
| 1  | 0.298637  | -1.614109 | -1.613449 |
| 1  | 1.394543  | -1.353944 | -0.440591 |
| 7  | -1.445857 | -1.710080 | 0.296621  |
| 1  | -1.544429 | -0.890699 | 0.901018  |
| 1  | -0.575262 | -2.155601 | 0.577464  |
| 1  | -2.203027 | -2.353213 | 0.505351  |
| 7  | 1.305021  | -0.750259 | 1.678983  |
| 1  | 0.421624  | -0.623875 | 2.167870  |
| 1  | 1.532455  | 0.163538  | 1.279431  |
| 1  | 2.011118  | -0.980691 | 2.370921  |
| 7  | 1.445857  | 1.710080  | -0.296621 |
| 1  | 2.203027  | 2.353213  | -0.505351 |
| 1  | 0.575262  | 2.155601  | -0.577464 |
| 1  | 1.544429  | 0.890699  | -0.901018 |
| 7  | -1.305021 | 0.750259  | -1.678983 |
| 1  | -1.532455 | -0.163538 | -1.279431 |
| 1  | -0.421624 | 0.623875  | -2.167870 |
| 1  | -2.011118 | 0.980691  | -2.370921 |

-----

Cartesian coordinates of : P6\_1

-----

Atomic number (AN) and Cartesian coordinates

| AN | X         | Y         | Z         |
|----|-----------|-----------|-----------|
| 7  | -0.532795 | -0.759084 | 1.588549  |
| 1  | -0.308220 | 0.235592  | 1.555934  |
| 1  | 0.209393  | -1.249974 | 1.087755  |
| 1  | -0.493838 | -1.054229 | 2.559073  |
| 7  | -0.157058 | -0.139007 | -1.664107 |
| 1  | -1.154527 | -0.321753 | -1.518506 |
| 1  | 0.348292  | -0.865479 | -1.154813 |
| 1  | 0.036301  | -0.271603 | -2.652485 |
| 7  | -2.910198 | -0.765233 | -0.373632 |
| 1  | -2.274673 | -0.860243 | 0.426861  |

|   |           |           |           |
|---|-----------|-----------|-----------|
| 1 | -3.307451 | -1.679036 | -0.567983 |
| 1 | -3.678931 | -0.159665 | -0.104437 |
| 7 | 2.215042  | 1.285232  | -0.093968 |
| 1 | 1.637274  | 1.673549  | 0.648939  |
| 1 | 1.589811  | 1.180516  | -0.893194 |
| 1 | 2.929553  | 1.967787  | -0.324475 |
| 7 | 2.127197  | -1.772020 | 0.082928  |
| 1 | 2.551494  | -2.181266 | -0.744428 |
| 1 | 2.519116  | -2.261756 | 0.881883  |
| 7 | -0.752930 | 2.137871  | 0.471637  |
| 1 | -0.628100 | 1.557856  | -0.362547 |
| 1 | -0.595405 | 3.104536  | 0.202455  |
| 1 | -1.728648 | 2.062091  | 0.745052  |
| 1 | 2.423762  | -0.791231 | 0.135067  |

-----

Cartesian coordinates of : P6\_2

-----

Atomic number (AN) and Cartesian coordinates

| AN | X         | Y         | Z         |
|----|-----------|-----------|-----------|
| 7  | -0.336754 | 0.963298  | -1.463861 |
| 1  | 0.517646  | 1.264792  | -0.994871 |
| 1  | -0.237006 | 1.180950  | -2.450260 |
| 1  | -0.401724 | -0.052480 | -1.372513 |
| 7  | 1.958554  | -1.584699 | -0.126734 |
| 1  | 1.319580  | -1.837749 | -0.876353 |
| 1  | 1.371866  | -1.327489 | 0.670148  |
| 1  | 2.495966  | -2.411256 | 0.113238  |
| 7  | -1.332014 | -1.847577 | -0.393863 |
| 1  | -1.797057 | -2.708866 | -0.662642 |
| 1  | -2.046762 | -1.177765 | -0.105612 |
| 1  | -0.778538 | -2.035714 | 0.438339  |
| 7  | -2.819029 | 0.941967  | 0.285993  |
| 1  | -2.099057 | 1.235867  | -0.385182 |
| 1  | -2.957504 | 1.696975  | 0.951229  |
| 1  | -3.693469 | 0.837386  | -0.220348 |
| 7  | 0.025770  | 0.103411  | 1.663299  |
| 1  | 0.055047  | 0.290345  | 2.660995  |
| 1  | -0.942547 | 0.219859  | 1.362716  |
| 1  | 0.573190  | 0.829522  | 1.199141  |
| 7  | 2.506782  | 1.424182  | 0.000351  |
| 1  | 2.963726  | 1.937168  | -0.747737 |
| 1  | 2.612550  | 0.421616  | -0.187936 |
| 1  | 3.020937  | 1.632762  | 0.851364  |

-----

Cartesian coordinates of : P6\_3

-----

Atomic number (AN) and Cartesian coordinates

| AN | X         | Y         | Z         |
|----|-----------|-----------|-----------|
| 7  | -0.231605 | 0.627689  | 1.877814  |
| 1  | -0.523992 | -0.324483 | 1.661430  |
| 1  | -0.172502 | 0.714484  | 2.887257  |
| 1  | 0.709735  | 0.751817  | 1.499696  |
| 7  | 2.357380  | 1.244309  | 0.150347  |
| 1  | 1.747158  | 1.143349  | -0.668428 |
| 1  | 3.286366  | 0.941286  | -0.128119 |
| 1  | 2.426488  | 2.233738  | 0.369710  |
| 7  | 0.349487  | 0.196520  | -1.930347 |
| 1  | 0.282223  | 0.150821  | -2.941691 |
| 1  | -0.591577 | 0.317291  | -1.559899 |
| 1  | 0.713835  | -0.695251 | -1.588188 |
| 7  | -2.150941 | 1.461575  | -0.337768 |
| 1  | -1.831598 | 2.198229  | -0.960654 |
| 1  | -1.542986 | 1.468389  | 0.489997  |
| 1  | -3.087211 | 1.717196  | -0.038293 |
| 7  | 1.452616  | -1.860091 | 0.087988  |
| 1  | 0.501446  | -1.962571 | 0.441565  |

|   |           |           |           |
|---|-----------|-----------|-----------|
| 1 | 1.855926  | -1.032714 | 0.525125  |
| 1 | 1.991705  | -2.666907 | 0.384068  |
| 7 | -1.727838 | -1.661879 | 0.134241  |
| 1 | -1.583166 | -2.209706 | -0.710027 |
| 1 | -2.010609 | -0.724274 | -0.163110 |
| 1 | -2.514937 | -2.077554 | 0.623638  |

-----

Cartesian coordinates of : Cs6

-----

Atomic number (AN) and Cartesian coordinates

| AN | X         | Y         | Z         |
|----|-----------|-----------|-----------|
| 7  | 0.000001  | 0.479719  | -1.573818 |
| 1  | 0.000000  | 0.788556  | -2.541507 |
| 1  | 0.818430  | 0.895282  | -1.125539 |
| 1  | -0.818431 | 0.895277  | -1.125539 |
| 7  | 1.772706  | -1.668325 | 0.000008  |
| 1  | 1.936057  | -2.669519 | 0.000015  |
| 1  | 1.197929  | -1.434525 | -0.809052 |
| 1  | 1.197930  | -1.434514 | 0.809065  |
| 7  | 2.796721  | 1.163378  | -0.000004 |
| 1  | 3.303330  | 1.498478  | -0.814129 |
| 1  | 2.838137  | 0.138942  | -0.000002 |
| 1  | 3.303334  | 1.498481  | 0.814118  |
| 7  | 0.000000  | 0.479746  | 1.573809  |
| 1  | -0.000002 | 0.788582  | 2.541498  |
| 1  | -0.818429 | 0.895306  | 1.125529  |
| 1  | 0.818431  | 0.895305  | 1.125531  |
| 7  | -2.796721 | 1.163379  | -0.000004 |
| 1  | -3.303332 | 1.498483  | 0.814118  |
| 1  | -2.838138 | 0.138943  | 0.000000  |
| 1  | -3.303331 | 1.498478  | -0.814128 |
| 7  | -1.772707 | -1.668325 | 0.000007  |
| 1  | -1.197935 | -1.434533 | -0.809058 |
| 1  | -1.936057 | -2.669519 | 0.000025  |
| 1  | -1.197925 | -1.434505 | 0.809058  |

-----

Cartesian coordinates of : P6\_4

-----

Atomic number (AN) and Cartesian coordinates

| AN | X         | Y         | Z         |
|----|-----------|-----------|-----------|
| 7  | 2.380396  | 1.407057  | 0.014031  |
| 1  | 2.903950  | 1.764427  | 0.808152  |
| 1  | 2.853843  | 1.750152  | -0.817216 |
| 1  | 2.470818  | 0.383739  | 0.017154  |
| 7  | -0.250225 | 0.204188  | 1.620545  |
| 1  | -0.068461 | -0.141004 | 2.557927  |
| 1  | 0.510873  | 0.833588  | 1.369974  |
| 1  | -0.178114 | -0.585360 | 0.978429  |
| 7  | -0.653638 | 1.728494  | -0.979878 |
| 1  | -0.862613 | 2.521576  | -1.577995 |
| 1  | 0.332723  | 1.783281  | -0.714617 |
| 1  | -1.179118 | 1.842298  | -0.116435 |
| 7  | -0.677053 | -1.421086 | -1.107450 |
| 1  | -1.584651 | -1.574715 | -0.664856 |
| 1  | -0.667095 | -1.960471 | -1.968314 |
| 1  | -0.667435 | -0.428228 | -1.361189 |
| 7  | -3.109412 | -0.274445 | 0.391618  |
| 1  | -2.365586 | 0.090996  | 0.988536  |
| 1  | -3.988977 | -0.210606 | 0.892674  |
| 1  | -3.170213 | 0.327144  | -0.424779 |
| 7  | 2.219510  | -1.684904 | 0.048891  |
| 1  | 1.265919  | -1.741701 | -0.325918 |
| 1  | 2.209379  | -2.103776 | 0.974171  |
| 1  | 2.817710  | -2.266473 | -0.530001 |

-----

Cartesian coordinates of : P6\_5

-----  
Atomic number (AN) and Cartesian coordinates

| AN | X         | Y         | Z         |
|----|-----------|-----------|-----------|
| 7  | 0.988102  | -1.847360 | 0.736630  |
| 1  | 1.916426  | -1.524096 | 0.994692  |
| 1  | 0.768819  | -1.427398 | -0.168238 |
| 1  | 1.035521  | -2.853199 | 0.605508  |
| 7  | -2.078106 | -1.418511 | 0.261825  |
| 1  | -2.162280 | -0.410932 | 0.134927  |
| 1  | -1.273857 | -1.580172 | 0.866121  |
| 1  | -2.909694 | -1.746825 | 0.740883  |
| 7  | 0.521412  | 1.031282  | 1.778978  |
| 1  | 1.341030  | 1.035779  | 1.167537  |
| 1  | 0.324056  | 0.048766  | 1.960571  |
| 1  | 0.776203  | 1.467725  | 2.659144  |
| 7  | -1.679624 | 1.893019  | -0.163993 |
| 1  | -2.576591 | 2.069567  | 0.279468  |
| 1  | -1.426340 | 2.751610  | -0.644817 |
| 1  | -0.985575 | 1.736980  | 0.578988  |
| 7  | -0.280352 | -0.392766 | -1.904736 |
| 1  | -0.892651 | -1.181476 | -1.692466 |
| 1  | -0.220212 | -0.315296 | -2.915845 |
| 1  | -0.792879 | 0.422620  | -1.557364 |
| 7  | 2.459727  | 0.669383  | -0.686709 |
| 1  | 2.670806  | 1.586397  | -1.068716 |
| 1  | 1.641146  | 0.304698  | -1.182543 |
| 1  | 3.247962  | 0.069926  | -0.911813 |

-----

Cartesian coordinates of : P6\_6

-----  
Atomic number (AN) and Cartesian coordinates

| AN | X         | Y         | Z         |
|----|-----------|-----------|-----------|
| 7  | 2.499657  | -1.142643 | -0.320169 |
| 1  | 3.332246  | -1.695900 | -0.492532 |
| 1  | 1.880725  | -1.221570 | -1.128142 |
| 1  | 1.980602  | -1.565324 | 0.448271  |
| 7  | 0.001435  | -0.840710 | 1.609584  |
| 1  | 0.330433  | 0.072158  | 1.295542  |
| 1  | 0.288353  | -0.950172 | 2.577622  |
| 1  | -1.020581 | -0.803234 | 1.587671  |
| 7  | -1.046458 | 1.832678  | -0.825049 |
| 1  | -0.850769 | 2.027131  | -1.803610 |
| 1  | -0.140557 | 1.786106  | -0.344772 |
| 1  | -1.529653 | 2.650386  | -0.462878 |
| 7  | 1.839840  | 1.725570  | 0.441076  |
| 1  | 2.275584  | 2.450997  | -0.121775 |
| 1  | 2.251192  | 0.826611  | 0.155253  |
| 1  | 2.125632  | 1.899919  | 1.400690  |
| 7  | -0.347872 | -1.297646 | -1.480885 |
| 1  | -0.921289 | -1.937899 | -2.020308 |
| 1  | -0.810802 | -0.391083 | -1.467981 |
| 1  | -0.327140 | -1.617179 | -0.512001 |
| 7  | -2.883742 | -0.380180 | 0.573189  |
| 1  | -3.751797 | -0.003117 | 0.939434  |
| 1  | -3.122551 | -1.149639 | -0.044480 |
| 1  | -2.429639 | 0.342329  | 0.009775  |

-----

Cartesian coordinates of : P6\_7

-----  
Atomic number (AN) and Cartesian coordinates

| AN | X        | Y         | Z         |
|----|----------|-----------|-----------|
| 7  | 0.838560 | -1.964876 | -0.495856 |
| 1  | 1.220385 | -2.330556 | -1.363734 |

-----

|   |           |           |           |
|---|-----------|-----------|-----------|
| 1 | 0.507499  | -2.766917 | 0.032994  |
| 1 | 1.619615  | -1.549666 | 0.025657  |
| 7 | -0.411888 | 0.667810  | 1.207025  |
| 1 | -1.427854 | 0.590631  | 1.305844  |
| 1 | -0.028185 | 0.825939  | 2.134032  |
| 1 | -0.076997 | -0.242625 | 0.892716  |
| 7 | -3.469362 | 0.008630  | 0.855582  |
| 1 | -3.864544 | -0.846748 | 1.232070  |
| 1 | -3.092288 | -0.191651 | -0.074930 |
| 1 | -4.230063 | 0.672197  | 0.752024  |
| 7 | -1.548302 | -0.090020 | -1.551677 |
| 1 | -1.611199 | -0.126816 | -2.563905 |
| 1 | -0.799663 | -0.720975 | -1.253399 |
| 1 | -1.260644 | 0.849296  | -1.288548 |
| 7 | 1.559851  | 1.702070  | -0.912997 |
| 1 | 1.304688  | 1.127557  | -1.711254 |
| 1 | 1.635057  | 2.661001  | -1.235740 |
| 1 | 0.792232  | 1.637395  | -0.236954 |
| 7 | 2.991469  | -0.274499 | 0.938902  |
| 1 | 3.981832  | -0.474206 | 0.839572  |
| 1 | 2.846474  | 0.025624  | 1.898075  |
| 1 | 2.761358  | 0.516719  | 0.328625  |

-----

Cartesian coordinates of : TC6\_1

-----

Atomic number (AN) and Cartesian coordinates

| AN | X         | Y         | Z         |
|----|-----------|-----------|-----------|
| 7  | 0.642123  | -1.253585 | -1.151119 |
| 1  | 0.796793  | -1.768509 | -2.012337 |
| 1  | 0.677469  | -0.260527 | -1.376170 |
| 1  | -0.305737 | -1.468113 | -0.827411 |
| 7  | -2.249017 | -1.698386 | 0.046310  |
| 1  | -2.725079 | -0.797387 | -0.070064 |
| 1  | -2.369520 | -1.978567 | 1.015452  |
| 1  | -2.746228 | -2.383508 | -0.515131 |
| 7  | -0.324707 | 0.864836  | 1.075000  |
| 1  | 0.395297  | 1.170497  | 0.416295  |
| 1  | -0.385208 | -0.148536 | 0.995702  |
| 1  | 0.010857  | 1.079383  | 2.009037  |
| 7  | 2.898659  | -0.810152 | 0.912878  |
| 1  | 2.161391  | -1.197656 | 0.313316  |
| 1  | 2.540664  | -0.776375 | 1.862342  |
| 1  | 3.682190  | -1.455347 | 0.912272  |
| 7  | -3.146844 | 1.264794  | -0.097327 |
| 1  | -3.126234 | 1.753011  | -0.986979 |
| 1  | -2.232913 | 1.386888  | 0.351241  |
| 1  | -3.849107 | 1.718857  | 0.477480  |
| 7  | 2.163328  | 1.638660  | -0.799125 |
| 1  | 2.496248  | 1.541664  | -1.753881 |
| 1  | 2.677432  | 0.966490  | -0.220344 |
| 1  | 2.416886  | 2.574565  | -0.497143 |

-----

Cartesian coordinates of : DC6\_1

-----

Atomic number (AN) and Cartesian coordinates

| AN | X         | Y         | Z         |
|----|-----------|-----------|-----------|
| 7  | 2.800982  | 0.092238  | 0.213451  |
| 1  | 3.710061  | 0.338075  | -0.166265 |
| 1  | 2.902155  | 0.050222  | 1.223133  |
| 1  | 2.152730  | 0.857719  | 0.000992  |
| 7  | -2.191762 | 1.520463  | -0.182650 |
| 1  | -2.278405 | 0.559650  | -0.526890 |
| 1  | -3.005946 | 2.039620  | -0.496088 |
| 1  | -2.246282 | 1.441217  | 0.830059  |
| 7  | -2.185432 | -1.578776 | -0.255263 |
| 1  | -2.202432 | -1.376223 | 0.741918  |

|   |           |           |           |
|---|-----------|-----------|-----------|
| 1 | -1.238756 | -1.904353 | -0.456606 |
| 1 | -2.831261 | -2.339302 | -0.439364 |
| 7 | 0.960723  | -2.215273 | -0.730635 |
| 1 | 1.311886  | -3.138126 | -0.492558 |
| 1 | 1.688469  | -1.533499 | -0.487773 |
| 1 | 0.858120  | -2.193016 | -1.741489 |
| 7 | 0.726209  | 2.296592  | -0.680300 |
| 1 | 0.958980  | 2.272441  | -1.669521 |
| 1 | 0.890895  | 3.249458  | -0.368241 |
| 1 | -0.285736 | 2.122918  | -0.608417 |
| 7 | -0.228643 | -0.131164 | 1.628319  |
| 1 | 0.271425  | -0.111872 | 2.511835  |
| 1 | 0.043834  | 0.699101  | 1.103871  |
| 1 | 0.125719  | -0.922586 | 1.090951  |

-----

Cartesian coordinates of : DC6\_2

-----

Atomic number (AN) and Cartesian coordinates

| AN | X         | Y         | Z         |
|----|-----------|-----------|-----------|
| 7  | 1.982139  | -2.030927 | -0.368657 |
| 1  | 2.699326  | -1.322779 | -0.182606 |
| 1  | 1.965395  | -2.192117 | -1.371079 |
| 1  | 2.284325  | -2.899003 | 0.062618  |
| 7  | -0.628136 | -0.681918 | 0.760779  |
| 1  | -0.591097 | -0.771579 | 1.772704  |
| 1  | 0.159957  | -1.225175 | 0.391465  |
| 1  | -1.496128 | -1.132338 | 0.458223  |
| 7  | 1.051988  | 1.756601  | -0.389492 |
| 1  | 0.886851  | 1.774991  | -1.391477 |
| 1  | 0.714968  | 2.638691  | -0.016108 |
| 1  | 0.467564  | 1.011253  | 0.000330  |
| 7  | -3.596532 | -1.249578 | -0.221662 |
| 1  | -3.606395 | -0.227959 | -0.257621 |
| 1  | -4.363521 | -1.554200 | 0.368731  |
| 1  | -3.780071 | -1.600443 | -1.156025 |
| 7  | 3.797965  | 0.435270  | 0.222721  |
| 1  | 4.083989  | 0.568398  | 1.187497  |
| 1  | 2.983134  | 1.032819  | 0.050253  |
| 1  | 4.560389  | 0.762204  | -0.361927 |
| 7  | -2.608176 | 1.689598  | 0.016192  |
| 1  | -2.332883 | 2.274099  | -0.766593 |
| 1  | -1.800155 | 1.122060  | 0.282517  |
| 1  | -2.830388 | 2.307753  | 0.789935  |

-----

Cartesian coordinates of : TC6\_2

-----

Atomic number (AN) and Cartesian coordinates

| AN | X         | Y         | Z         |
|----|-----------|-----------|-----------|
| 7  | -2.579006 | -1.343036 | 1.032828  |
| 1  | -2.447928 | -1.214119 | 0.026727  |
| 1  | -3.576948 | -1.413828 | 1.207581  |
| 1  | -2.172654 | -2.239079 | 1.284706  |
| 7  | 0.405115  | -0.460311 | 0.220955  |
| 1  | -0.254191 | -0.658245 | -0.530031 |
| 1  | -0.072811 | -0.714966 | 1.082001  |
| 1  | 1.217901  | -1.071855 | 0.110511  |
| 7  | -1.763618 | 1.696726  | 0.649700  |
| 1  | -2.085732 | 0.887770  | 1.182639  |
| 1  | -1.993817 | 2.539538  | 1.164805  |
| 1  | -0.750115 | 1.613561  | 0.601727  |
| 7  | 3.368447  | -1.452285 | -0.134635 |
| 1  | 3.929072  | -1.856767 | 0.608388  |
| 1  | 3.494970  | -0.437310 | -0.110626 |
| 1  | 3.744783  | -1.795688 | -1.012373 |
| 7  | -2.149913 | -0.038488 | -1.827591 |
| 1  | -1.455853 | 0.116363  | -2.553098 |



|   |           |           |           |
|---|-----------|-----------|-----------|
| 1 | -2.152580 | 0.785438  | -1.216896 |
| 1 | -3.050894 | -0.086458 | -2.293904 |
| 7 | 2.744922  | 1.598481  | 0.071548  |
| 1 | 2.895183  | 2.132551  | 0.921328  |
| 1 | 1.828399  | 1.146352  | 0.135260  |
| 1 | 2.721584  | 2.259127  | -0.698376 |

-----

Cartesian coordinates of : CY6

-----

Atomic number (AN) and Cartesian coordinates

| AN | X         | Y         | Z         |
|----|-----------|-----------|-----------|
| 7  | 2.681320  | 0.869313  | 0.671658  |
| 1  | 3.610120  | 1.270795  | 0.586266  |
| 1  | 2.463514  | 0.842784  | 1.663289  |
| 1  | 2.021616  | 1.522573  | 0.233398  |
| 7  | -2.681320 | -0.869313 | -0.671658 |
| 1  | -2.021616 | -1.522573 | -0.233398 |
| 1  | -2.463514 | -0.842784 | -1.663289 |
| 1  | -3.610120 | -1.270795 | -0.586266 |
| 7  | -0.586872 | -2.753289 | 0.672084  |
| 1  | -0.500579 | -2.548430 | 1.663089  |
| 1  | 0.309048  | -2.511117 | 0.233150  |
| 1  | -0.704826 | -3.758526 | 0.589884  |
| 7  | 2.093243  | -1.885723 | -0.671807 |
| 1  | 2.905002  | -2.490078 | -0.588451 |
| 1  | 2.330449  | -0.988596 | -0.232594 |
| 1  | 1.960259  | -1.708644 | -1.662986 |
| 7  | -2.093243 | 1.885723  | 0.671807  |
| 1  | -2.905002 | 2.490078  | 0.588451  |
| 1  | -1.960259 | 1.708645  | 1.662986  |
| 1  | -2.330449 | 0.988596  | 0.232594  |
| 7  | 0.586872  | 2.753289  | -0.672084 |
| 1  | 0.500579  | 2.548430  | -1.663089 |
| 1  | 0.704826  | 3.758526  | -0.589884 |
| 1  | -0.309048 | 2.511117  | -0.233150 |

-----

Cartesian coordinates of : BP6

-----

Atomic number (AN) and Cartesian coordinates

| AN | X         | Y         | Z         |
|----|-----------|-----------|-----------|
| 7  | 0.625156  | -2.201269 | 0.470351  |
| 1  | 0.397887  | -2.493994 | 1.416420  |
| 1  | 0.634716  | -3.043668 | -0.097351 |
| 1  | -0.145186 | -1.606465 | 0.136828  |
| 7  | 1.919156  | 0.037129  | -1.702852 |
| 1  | 1.298470  | 0.780787  | -1.388248 |
| 1  | 1.626829  | -0.801382 | -1.202804 |
| 1  | 1.752111  | -0.114223 | -2.692235 |
| 7  | 0.645547  | 2.154435  | 0.402713  |
| 1  | 0.062349  | 2.555450  | 1.131506  |
| 1  | 1.158297  | 2.926496  | -0.014193 |
| 1  | 1.337773  | 1.544904  | 0.855967  |
| 7  | -1.334345 | -0.137219 | -0.683401 |
| 1  | -0.806129 | 0.695049  | -0.411506 |
| 1  | -2.306513 | -0.012306 | -0.398612 |
| 1  | -1.318621 | -0.179394 | -1.698289 |
| 7  | -4.407138 | 0.092535  | 0.325974  |
| 1  | -4.847339 | 1.003949  | 0.253964  |
| 1  | -4.395417 | -0.165842 | 1.307321  |
| 1  | -5.001279 | -0.573362 | -0.157113 |
| 7  | 2.777999  | 0.073560  | 1.153356  |
| 1  | 3.264369  | 0.207154  | 0.268803  |
| 1  | 2.234354  | -0.785359 | 1.044663  |
| 1  | 3.468710  | -0.071992 | 1.881902  |

-----

Cartesian coordinates of : BDC6\_1

-----  
Atomic number (AN) and Cartesian coordinates

| AN | X         | Y         | Z         |
|----|-----------|-----------|-----------|
| 7  | -1.932873 | -1.047710 | -0.966327 |
| 1  | -2.430784 | -1.216392 | -1.834497 |
| 1  | -1.105368 | -0.494181 | -1.183570 |
| 1  | -2.526787 | -0.463043 | -0.372974 |
| 7  | -0.462744 | 2.225917  | -0.365429 |
| 1  | 0.110873  | 1.389960  | -0.527043 |
| 1  | 0.135924  | 2.927414  | 0.059879  |
| 1  | -0.730681 | 2.584534  | -1.277496 |
| 7  | 1.284629  | -0.338622 | -0.861217 |
| 1  | 1.432187  | -0.703902 | -1.798226 |
| 1  | 1.041685  | -1.139246 | -0.270134 |
| 1  | 2.185681  | 0.018630  | -0.538499 |
| 7  | -0.021487 | -2.771503 | 0.696949  |
| 1  | 0.104941  | -3.745834 | 0.442527  |
| 1  | -0.836302 | -2.410685 | 0.188524  |
| 1  | -0.238807 | -2.748098 | 1.688159  |
| 7  | -3.059898 | 1.137136  | 0.979656  |
| 1  | -2.949503 | 0.920060  | 1.964799  |
| 1  | -3.841752 | 1.778728  | 0.898291  |
| 1  | -2.213548 | 1.619740  | 0.661188  |
| 7  | 4.033513  | 0.702286  | 0.487186  |
| 1  | 3.778651  | 0.708869  | 1.469652  |
| 1  | 4.429129  | 1.610178  | 0.266546  |
| 1  | 4.766473  | 0.010745  | 0.367147  |

-----

Cartesian coordinates of : BDC6\_2

-----  
Atomic number (AN) and Cartesian coordinates

| AN | X         | Y         | Z         |
|----|-----------|-----------|-----------|
| 7  | -0.176001 | 2.160300  | 0.482657  |
| 1  | 0.195059  | 2.872403  | -0.139130 |
| 1  | -0.376350 | 2.618722  | 1.366526  |
| 1  | -1.070103 | 1.848828  | 0.091205  |
| 7  | -2.947209 | 1.121401  | -0.644714 |
| 1  | -3.119200 | 0.277522  | -0.086496 |
| 1  | -3.120824 | 0.870761  | -1.614193 |
| 1  | -3.653841 | 1.806728  | -0.393811 |
| 7  | -0.549718 | -1.135018 | -1.075696 |
| 1  | 0.310694  | -1.113083 | -0.518321 |
| 1  | -0.832955 | -0.163426 | -1.188353 |
| 1  | -0.315914 | -1.494026 | -1.996051 |
| 7  | 1.754525  | -0.365172 | 0.834154  |
| 1  | 1.242995  | 0.520339  | 0.807072  |
| 1  | 2.731508  | -0.189584 | 0.601228  |
| 1  | 1.724512  | -0.709834 | 1.788360  |
| 7  | -2.943374 | -1.633735 | 0.765129  |
| 1  | -2.638106 | -1.715744 | 1.729741  |
| 1  | -2.116410 | -1.736138 | 0.165496  |
| 1  | -3.570269 | -2.410535 | 0.582326  |
| 7  | 4.777662  | -0.213604 | -0.307143 |
| 1  | 4.715285  | -1.122872 | -0.753653 |
| 1  | 5.645363  | -0.184599 | 0.217502  |
| 1  | 4.837361  | 0.485343  | -1.040165 |

-----

Cartesian coordinates of : BC6\_1

-----  
Atomic number (AN) and Cartesian coordinates

| AN | X        | Y         | Z         |
|----|----------|-----------|-----------|
| 7  | 0.875452 | -1.662663 | 0.129126  |
| 1  | 1.621964 | -2.191979 | -0.311607 |

-----

|   |           |           |           |
|---|-----------|-----------|-----------|
| 1 | 0.958459  | -1.815683 | 1.129971  |
| 1 | 1.064659  | -0.670414 | -0.039957 |
| 7 | -1.403253 | 2.387182  | -0.432791 |
| 1 | -1.995246 | 1.717642  | 0.072293  |
| 1 | -1.743068 | 2.422054  | -1.389453 |
| 1 | -1.572306 | 3.304667  | -0.031164 |
| 7 | -3.131954 | 0.229395  | 1.007431  |
| 1 | -2.844803 | 0.051398  | 1.965031  |
| 1 | -2.887957 | -0.599811 | 0.454536  |
| 1 | -4.143841 | 0.311682  | 1.013646  |
| 7 | -2.091725 | -2.123796 | -0.741342 |
| 1 | -2.358816 | -3.093149 | -0.601276 |
| 1 | -1.096569 | -2.036089 | -0.508993 |
| 1 | -2.192462 | -1.929724 | -1.732908 |
| 7 | 1.555515  | 1.421661  | -0.284538 |
| 1 | 2.014341  | 1.766346  | -1.123762 |
| 1 | 2.001479  | 1.899079  | 0.494921  |
| 1 | 0.580951  | 1.746173  | -0.324101 |
| 7 | 4.242446  | -0.174164 | 0.356945  |
| 1 | 4.741051  | -0.513346 | -0.458629 |
| 1 | 3.274589  | -0.001512 | 0.093347  |
| 1 | 4.252205  | -0.910631 | 1.054277  |

-----

Cartesian coordinates of : BC6\_2

-----

Atomic number (AN) and Cartesian coordinates

| AN | X         | Y         | Z         |
|----|-----------|-----------|-----------|
| 7  | 1.192433  | -1.538219 | 0.406654  |
| 1  | 1.823562  | -2.166397 | -0.081999 |
| 1  | 1.372910  | -1.656213 | 1.399324  |
| 1  | 1.464006  | -0.582540 | 0.161312  |
| 7  | 1.830874  | 1.494686  | -0.302848 |
| 1  | 0.839028  | 1.647490  | -0.086058 |
| 1  | 1.982831  | 1.799473  | -1.260254 |
| 1  | 2.377209  | 2.116435  | 0.287283  |
| 7  | -1.192429 | 1.538215  | 0.406673  |
| 1  | -1.372897 | 1.656211  | 1.399345  |
| 1  | -1.464004 | 0.582536  | 0.161335  |
| 1  | -1.823564 | 2.166392  | -0.081974 |
| 7  | -1.830878 | -1.494688 | -0.302834 |
| 1  | -2.377207 | -2.116441 | 0.287297  |
| 1  | -0.839030 | -1.647493 | -0.086055 |
| 1  | -1.982845 | -1.799467 | -1.260241 |
| 7  | 4.608310  | -0.105262 | -0.094510 |
| 1  | 4.680022  | -0.782812 | 0.656794  |
| 1  | 4.903862  | -0.559693 | -0.951659 |
| 1  | 3.630050  | 0.160596  | -0.189926 |
| 7  | -4.608311 | 0.105266  | -0.094528 |
| 1  | -4.680047 | 0.782778  | 0.656809  |
| 1  | -4.903828 | 0.559744  | -0.951665 |
| 1  | -3.630050 | -0.160595 | -0.189920 |

-----

Cartesian coordinates of : BC6\_3

-----

Atomic number (AN) and Cartesian coordinates

| AN | X         | Y         | Z         |
|----|-----------|-----------|-----------|
| 7  | 0.889958  | -0.734532 | 1.540208  |
| 1  | 1.283410  | -1.669272 | 1.491193  |
| 1  | 1.283615  | -0.291057 | 2.364642  |
| 1  | 1.227685  | -0.217197 | 0.725267  |
| 7  | 1.798232  | 0.988312  | -1.006876 |
| 1  | 0.989564  | 1.584116  | -0.786070 |
| 1  | 1.668877  | 0.646582  | -1.955327 |
| 1  | 2.621020  | 1.584946  | -1.029272 |
| 7  | -0.711105 | 2.585164  | -0.152894 |
| 1  | -0.541517 | 3.280060  | 0.568322  |

|   |           |           |           |
|---|-----------|-----------|-----------|
| 1 | -1.279848 | 1.839078  | 0.269667  |
| 1 | -1.277822 | 3.037680  | -0.863860 |
| 7 | -2.115020 | 0.166514  | 1.131703  |
| 1 | -2.643400 | 0.242209  | 1.995160  |
| 1 | -1.232181 | -0.302988 | 1.347999  |
| 1 | -2.648939 | -0.430482 | 0.499315  |
| 7 | 3.970492  | -1.302748 | -0.446882 |
| 1 | 4.284846  | -1.381086 | 0.514275  |
| 1 | 3.685048  | -2.225638 | -0.755927 |
| 1 | 3.155860  | -0.691123 | -0.463748 |
| 7 | -3.697596 | -1.636348 | -1.052842 |
| 1 | -4.455393 | -1.121849 | -1.489401 |
| 1 | -4.066972 | -2.532451 | -0.752871 |
| 1 | -2.998589 | -1.816052 | -1.766283 |

-----

Cartesian coordinates of : BC6\_4

-----

Atomic number (AN) and Cartesian coordinates

| AN | X         | Y         | Z         |
|----|-----------|-----------|-----------|
| 7  | 2.132235  | 1.412095  | -0.368276 |
| 1  | 2.984256  | 1.395297  | 0.183651  |
| 1  | 2.410971  | 1.384464  | -1.344262 |
| 1  | 1.613561  | 0.552739  | -0.169192 |
| 7  | 0.279354  | -1.070462 | 0.284165  |
| 1  | -0.549214 | -0.490798 | 0.114823  |
| 1  | 0.221527  | -1.397015 | 1.245166  |
| 1  | 0.200182  | -1.896869 | -0.303153 |
| 7  | -2.223041 | 0.806035  | -0.176366 |
| 1  | -2.652863 | 0.898593  | -1.092861 |
| 1  | -1.673537 | 1.658790  | -0.014003 |
| 1  | -2.986595 | 0.800213  | 0.495145  |
| 7  | -0.318756 | 3.221799  | 0.286162  |
| 1  | -0.402567 | 4.031347  | -0.320863 |
| 1  | 0.574885  | 2.764845  | 0.077741  |
| 1  | -0.269849 | 3.572593  | 1.237817  |
| 7  | 3.249313  | -2.222425 | 0.034030  |
| 1  | 3.844413  | -1.927821 | -0.732615 |
| 1  | 3.798794  | -2.179823 | 0.885480  |
| 1  | 2.482564  | -1.558120 | 0.112959  |
| 7  | -3.243033 | -2.233020 | -0.050203 |
| 1  | -3.261487 | -2.724263 | -0.937447 |
| 1  | -2.836490 | -2.856923 | 0.638575  |
| 1  | -2.631062 | -1.425409 | -0.143546 |

-----

Cartesian coordinates of : BC6\_5

-----

Atomic number (AN) and Cartesian coordinates

| AN | X         | Y         | Z         |
|----|-----------|-----------|-----------|
| 7  | -2.070451 | -0.092109 | 0.811579  |
| 1  | -2.156632 | -0.046061 | 1.822453  |
| 1  | -3.012137 | -0.029862 | 0.424654  |
| 1  | -1.545920 | 0.737012  | 0.518306  |
| 7  | -0.038690 | 2.170780  | -0.070314 |
| 1  | 0.744879  | 1.565221  | 0.206284  |
| 1  | 0.075155  | 3.062704  | 0.400925  |
| 1  | 0.047481  | 2.349203  | -1.066043 |
| 7  | 2.070452  | 0.092189  | 0.811568  |
| 1  | 3.012138  | 0.029925  | 0.424647  |
| 1  | 1.545917  | -0.736938 | 0.518318  |
| 1  | 2.156631  | 0.046169  | 1.822444  |
| 7  | 0.038686  | -2.170729 | -0.070246 |
| 1  | -0.047494 | -2.349188 | -1.065968 |
| 1  | -0.744879 | -1.565156 | 0.206336  |
| 1  | -0.075160 | -3.062634 | 0.401026  |
| 7  | -4.962935 | 0.025067  | -0.680782 |
| 1  | -5.840909 | 0.026904  | -0.172663 |

```

1   -4.956183   -0.791220   -1.283340
1   -4.948367    0.847889   -1.274290
7    4.962939   -0.025183   -0.680778
1    4.948501   -0.848251   -1.273948
1    5.840910   -0.026679   -0.172651
1    4.956069    0.790855   -1.283673

```

-----

Cartesian coordinates of ammonia heptamer: (NH3)7

Cartesian coordinates of : AM7\_1

-----

Atomic number (AN) and Cartesian coordinates

| AN | X         | Y         | Z         |
|----|-----------|-----------|-----------|
| 7  | -2.794645 | -1.230003 | 0.353964  |
| 1  | -2.709212 | -0.316571 | -0.107777 |
| 1  | -3.297160 | -1.093915 | 1.226412  |
| 1  | -3.384490 | -1.815623 | -0.230227 |
| 7  | 0.000107  | -1.538300 | -1.319088 |
| 1  | -0.000008 | -2.262894 | -2.030856 |
| 1  | -0.820567 | -1.692054 | -0.730950 |
| 1  | 0.820676  | -1.692365 | -0.730886 |
| 7  | 0.000006  | -0.649360 | 1.839927  |
| 1  | 0.825010  | -1.024783 | 1.370089  |
| 1  | -0.824916 | -1.024919 | 1.370055  |
| 1  | 0.000018  | -1.018946 | 2.785892  |
| 7  | 1.752678  | 1.157322  | -1.218324 |
| 1  | 1.133469  | 0.460397  | -1.632749 |
| 1  | 2.096683  | 1.755354  | -1.962758 |
| 1  | 1.170987  | 1.730421  | -0.605738 |
| 7  | -0.000043 | 2.365299  | 1.192063  |
| 1  | 0.814827  | 2.827481  | 1.585633  |
| 1  | -0.814510 | 2.827643  | 1.586275  |
| 1  | -0.000002 | 1.394052  | 1.530973  |
| 7  | 2.794682  | -1.229898 | 0.353975  |
| 1  | 3.384403  | -1.815369 | -0.230495 |
| 1  | 3.297425  | -1.093986 | 1.226320  |
| 1  | 2.709125  | -0.316378 | -0.107567 |
| 7  | -1.752817 | 1.157245  | -1.218327 |
| 1  | -1.171272 | 1.730171  | -0.605430 |
| 1  | -1.133460 | 0.460595  | -1.632983 |
| 1  | -2.096797 | 1.755555  | -1.962551 |

-----

Cartesian coordinates of : AM7\_2

-----

Atomic number (AN) and Cartesian coordinates

| AN | X         | Y         | Z         |
|----|-----------|-----------|-----------|
| 7  | 0.592587  | -0.026241 | -1.857642 |
| 1  | 0.037763  | 0.767960  | -1.519823 |
| 1  | 0.570424  | -0.001331 | -2.872981 |
| 1  | 1.549770  | 0.169138  | -1.569534 |
| 7  | 2.401280  | 1.479118  | 0.208399  |
| 1  | 1.592198  | 1.268673  | 0.801794  |
| 1  | 3.113736  | 1.908432  | 0.790860  |
| 1  | 2.102960  | 2.179567  | -0.465349 |
| 7  | 0.010096  | 0.169283  | 1.703743  |
| 1  | 0.595888  | -0.650932 | 1.529720  |
| 1  | -0.821563 | 0.071087  | 1.122540  |
| 1  | -0.296915 | 0.134483  | 2.671108  |
| 7  | -1.080216 | -2.207855 | -0.373040 |
| 1  | -1.315673 | -3.021960 | -0.932274 |
| 1  | -0.493605 | -2.526200 | 0.394139  |
| 1  | -0.503118 | -1.581868 | -0.946457 |
| 7  | -3.092560 | 0.017242  | 0.297006  |
| 1  | -3.821553 | 0.120237  | -0.402994 |
| 1  | -3.560646 | -0.106183 | 1.189942  |

|   |           |           |           |
|---|-----------|-----------|-----------|
| 1 | -2.582692 | -0.849312 | 0.087287  |
| 7 | -0.961113 | 2.277933  | -0.381924 |
| 1 | -1.778523 | 1.701994  | -0.162649 |
| 1 | -1.284746 | 3.202631  | -0.646859 |
| 1 | -0.437377 | 2.362130  | 0.485824  |
| 7 | 2.148509  | -1.711994 | 0.408349  |
| 1 | 1.745550  | -1.965716 | -0.490135 |
| 1 | 2.887299  | -2.374837 | 0.619726  |
| 1 | 2.570742  | -0.790395 | 0.281881  |

-----

Cartesian coordinates of : AM7\_3

-----

Atomic number (AN) and Cartesian coordinates

| AN | X         | Y         | Z         |
|----|-----------|-----------|-----------|
| 7  | 0.496014  | 1.281148  | 1.425624  |
| 1  | 0.574724  | 1.918050  | 2.212649  |
| 1  | -0.311438 | 1.576559  | 0.877238  |
| 1  | 1.323488  | 1.407340  | 0.841206  |
| 7  | 1.436170  | -1.666744 | 0.770916  |
| 1  | 0.762422  | -2.029305 | 0.096394  |
| 1  | 0.979949  | -0.891796 | 1.256571  |
| 1  | 1.619360  | -2.400664 | 1.447667  |
| 7  | -1.232296 | -2.288784 | -0.949876 |
| 1  | -1.675853 | -1.760709 | -0.187416 |
| 1  | -1.316619 | -3.277254 | -0.730677 |
| 1  | -1.779495 | -2.131851 | -1.791673 |
| 7  | 3.181501  | 0.608160  | -0.255241 |
| 1  | 3.707727  | 0.518397  | -1.119366 |
| 1  | 3.837739  | 0.923977  | 0.453112  |
| 1  | 2.853420  | -0.326057 | 0.017377  |
| 7  | -2.017514 | 2.072220  | -0.589357 |
| 1  | -1.818974 | 3.067903  | -0.621134 |
| 1  | -2.905121 | 1.937047  | -1.064736 |
| 1  | -1.291209 | 1.588643  | -1.133687 |
| 7  | 0.303537  | 0.423100  | -1.730965 |
| 1  | 0.498990  | 0.391807  | -2.727437 |
| 1  | 1.176782  | 0.674791  | -1.266767 |
| 1  | 0.072331  | -0.529586 | -1.444334 |
| 7  | -2.144385 | -0.451138 | 1.345234  |
| 1  | -2.318129 | 0.449433  | 0.894908  |
| 1  | -2.881767 | -0.615979 | 2.022807  |
| 1  | -1.269514 | -0.336482 | 1.852946  |

-----

Cartesian coordinates of : AM7\_4

-----

Atomic number (AN) and Cartesian coordinates

| AN | X         | Y         | Z         |
|----|-----------|-----------|-----------|
| 7  | -3.287466 | 0.030453  | -0.100866 |
| 1  | -3.489195 | 0.087001  | -1.094188 |
| 1  | -4.156952 | -0.192701 | 0.372576  |
| 1  | -2.634209 | -0.742864 | 0.044383  |
| 7  | -0.879472 | 1.884843  | 0.637858  |
| 1  | -0.381057 | 1.269325  | 1.283881  |
| 1  | -1.813019 | 1.488405  | 0.498773  |
| 1  | -0.996069 | 2.781235  | 1.101252  |
| 7  | 1.386756  | 0.014605  | 1.964372  |
| 1  | 1.816374  | 0.291024  | 2.841854  |
| 1  | 1.820219  | 0.557824  | 1.212229  |
| 1  | 1.636588  | -0.956200 | 1.789908  |
| 7  | -0.380601 | -0.041435 | -1.865554 |
| 1  | -0.879035 | -0.807367 | -1.413857 |
| 1  | -0.809377 | 0.124516  | -2.770757 |
| 1  | -0.553987 | 0.779134  | -1.280934 |
| 7  | 2.017624  | 1.649403  | -0.644785 |
| 1  | 1.851562  | 1.109740  | -1.491138 |
| 1  | 2.652409  | 2.406939  | -0.875645 |

|   |           |           |           |
|---|-----------|-----------|-----------|
| 1 | 1.111286  | 2.050677  | -0.395295 |
| 7 | -0.866142 | -1.848533 | 0.703058  |
| 1 | 0.031520  | -2.136779 | 0.306917  |
| 1 | -1.234633 | -2.637700 | 1.226330  |
| 1 | -0.619894 | -1.124760 | 1.379198  |
| 7 | 2.016439  | -1.664302 | -0.672698 |
| 1 | 2.475553  | -2.378191 | -1.229850 |
| 1 | 1.389787  | -1.136218 | -1.285741 |
| 1 | 2.732162  | -1.008291 | -0.369590 |

-----

Cartesian coordinates of : AM7\_5

-----

Atomic number (AN) and Cartesian coordinates

| AN | X         | Y         | Z         |
|----|-----------|-----------|-----------|
| 7  | -2.946599 | -1.327477 | 0.520574  |
| 1  | -3.130794 | -0.323725 | 0.424623  |
| 1  | -3.180541 | -1.593321 | 1.472681  |
| 1  | -3.587860 | -1.828040 | -0.087362 |
| 7  | -0.618107 | -0.480007 | -1.660549 |
| 1  | -0.899717 | -0.630510 | -2.624993 |
| 1  | -1.357263 | -0.861379 | -1.068000 |
| 1  | 0.207947  | -1.063185 | -1.487245 |
| 7  | -0.102951 | -0.053145 | 1.435528  |
| 1  | 0.653679  | -0.056756 | 0.753440  |
| 1  | -0.789331 | -0.739866 | 1.119068  |
| 1  | 0.289867  | -0.391169 | 2.309203  |
| 7  | 1.048407  | 2.023889  | -0.710970 |
| 1  | 0.462678  | 1.299381  | -1.139005 |
| 1  | 1.199946  | 2.753260  | -1.400697 |
| 1  | 0.502405  | 2.427211  | 0.045768  |
| 7  | 3.188435  | 0.368374  | 0.754700  |
| 1  | 2.630562  | 1.037768  | 0.211122  |
| 1  | 3.161367  | 0.666227  | 1.725456  |
| 1  | 4.154513  | 0.446507  | 0.451535  |
| 7  | -2.368597 | 1.621619  | 0.127976  |
| 1  | -1.914325 | 1.504655  | -0.775548 |
| 1  | -2.673542 | 2.585449  | 0.210825  |
| 1  | -1.645782 | 1.437497  | 0.826356  |
| 7  | 1.776301  | -2.125718 | -0.489701 |
| 1  | 2.351544  | -1.430277 | -0.004612 |
| 1  | 2.395458  | -2.728562 | -1.022526 |
| 1  | 1.330965  | -2.703905 | 0.217005  |

-----

Cartesian coordinates of : AM7\_6

-----

Atomic number (AN) and Cartesian coordinates

| AN | X         | Y         | Z         |
|----|-----------|-----------|-----------|
| 7  | 3.042043  | 0.700447  | -0.512495 |
| 1  | 3.845832  | 0.980155  | 0.042353  |
| 1  | 3.306270  | 0.817294  | -1.486356 |
| 1  | 2.888348  | -0.301547 | -0.346282 |
| 7  | 2.058168  | -2.124114 | 0.160310  |
| 1  | 1.323883  | -1.725747 | 0.760144  |
| 1  | 2.598250  | -2.779321 | 0.717199  |
| 1  | 1.593888  | -2.664728 | -0.563702 |
| 7  | -0.218551 | -0.642946 | 1.614204  |
| 1  | -1.045336 | -0.964210 | 1.110309  |
| 1  | -0.089841 | 0.354607  | 1.423927  |
| 1  | -0.403833 | -0.744749 | 2.607063  |
| 7  | 0.558943  | 2.276824  | 0.654346  |
| 1  | 0.025756  | 2.548301  | -0.167451 |
| 1  | 1.435791  | 1.874014  | 0.309335  |
| 1  | 0.783998  | 3.124285  | 1.166311  |
| 7  | -0.152674 | -0.027158 | -1.453694 |
| 1  | -0.653967 | -0.828198 | -1.067697 |
| 1  | 0.156561  | -0.277466 | -2.388094 |

|   |           |           |           |
|---|-----------|-----------|-----------|
| 1 | 0.685227  | 0.102038  | -0.887584 |
| 7 | -2.575211 | 1.433883  | -0.169129 |
| 1 | -2.144012 | 1.732322  | 0.702058  |
| 1 | -3.111382 | 2.214567  | -0.533214 |
| 1 | -1.807214 | 1.227100  | -0.813190 |
| 7 | -2.728418 | -1.612265 | -0.246212 |
| 1 | -2.998468 | -1.939548 | -1.169179 |
| 1 | -3.011874 | -0.629844 | -0.170993 |
| 1 | -3.267975 | -2.152018 | 0.423728  |

-----

Cartesian coordinates of : AM7\_7

-----

Atomic number (AN) and Cartesian coordinates

| AN | X         | Y         | Z         |
|----|-----------|-----------|-----------|
| 7  | 2.786238  | -1.648033 | -0.574274 |
| 1  | 2.713987  | -2.517344 | -0.055161 |
| 1  | 3.442613  | -1.803959 | -1.332337 |
| 1  | 1.870654  | -1.440183 | -0.982091 |
| 7  | -0.301685 | -1.427407 | 1.379011  |
| 1  | -0.233869 | -2.040747 | 2.186069  |
| 1  | 0.385941  | -0.671041 | 1.505470  |
| 1  | 0.032045  | -1.948922 | 0.570341  |
| 7  | 1.858306  | 0.739258  | 1.221155  |
| 1  | 1.619534  | 1.513434  | 0.597816  |
| 1  | 2.487915  | 0.111157  | 0.716902  |
| 1  | 2.365815  | 1.125382  | 2.010884  |
| 7  | 0.441022  | 2.882867  | -0.637292 |
| 1  | 0.608122  | 3.812269  | -0.263899 |
| 1  | 0.342875  | 2.982808  | -1.642955 |
| 1  | -0.452369 | 2.544128  | -0.263112 |
| 7  | -1.942756 | 1.353502  | 0.589114  |
| 1  | -1.453801 | 0.619960  | 1.103469  |
| 1  | -2.506172 | 0.870658  | -0.107756 |
| 1  | -2.575563 | 1.814362  | 1.235592  |
| 7  | 0.060313  | -0.359333 | -1.466169 |
| 1  | 0.260400  | 0.400708  | -0.815103 |
| 1  | -0.936732 | -0.560539 | -1.377682 |
| 1  | 0.204605  | 0.018732  | -2.398551 |
| 7  | -2.820794 | -1.477226 | -0.492856 |
| 1  | -3.782219 | -1.395646 | -0.176374 |
| 1  | -2.743073 | -2.368456 | -0.973960 |
| 1  | -2.215214 | -1.512163 | 0.331624  |

-----

Cartesian coordinates of : AM7\_8

-----

Atomic number (AN) and Cartesian coordinates

| AN | X         | Y         | Z         |
|----|-----------|-----------|-----------|
| 7  | -0.585906 | 0.436231  | 1.567310  |
| 1  | -0.588183 | 0.735078  | 2.538122  |
| 1  | -1.432295 | 0.809993  | 1.134400  |
| 1  | 0.198455  | 0.904758  | 1.108648  |
| 7  | 1.882761  | 1.948297  | 0.000327  |
| 1  | 2.646937  | 1.261661  | -0.000116 |
| 1  | 2.017408  | 2.545915  | 0.811636  |
| 1  | 2.016647  | 2.546185  | -0.810908 |
| 7  | 3.889113  | -0.394304 | -0.000528 |
| 1  | 4.448897  | -0.619433 | -0.816775 |
| 1  | 3.064046  | -1.006692 | -0.000075 |
| 1  | 4.449612  | -0.619181 | 0.815298  |
| 7  | 1.146655  | -1.765270 | 0.000596  |
| 1  | 0.653568  | -1.376645 | -0.804027 |
| 1  | 0.653525  | -1.375553 | 0.804673  |
| 1  | 0.985629  | -2.768094 | 0.001273  |
| 7  | -2.325792 | -1.760803 | 0.000231  |
| 1  | -1.748376 | -1.527750 | 0.807726  |
| 1  | -1.748370 | -1.528163 | -0.807378 |



|   |           |           |           |
|---|-----------|-----------|-----------|
| 1 | -2.488046 | -2.762309 | 0.000489  |
| 7 | -0.585501 | 0.435419  | -1.567347 |
| 1 | -0.587235 | 0.734279  | -2.538156 |
| 1 | -1.431954 | 0.809475  | -1.134813 |
| 1 | 0.198803  | 0.903683  | -1.108335 |
| 7 | -3.421776 | 1.042335  | -0.000580 |
| 1 | -3.429171 | 0.017039  | -0.000302 |
| 1 | -3.938473 | 1.361431  | 0.813566  |
| 1 | -3.938300 | 1.360987  | -0.815010 |

-----

Cartesian coordinates of : AM7\_9

-----

Atomic number (AN) and Cartesian coordinates

| AN | X         | Y         | Z         |
|----|-----------|-----------|-----------|
| 7  | 2.827374  | 1.380711  | -0.006958 |
| 1  | 3.218342  | 0.432876  | 0.022683  |
| 1  | 3.113030  | 1.795980  | -0.889043 |
| 1  | 3.274869  | 1.918441  | 0.729365  |
| 7  | 3.349955  | -1.704642 | 0.150847  |
| 1  | 3.789461  | -2.153462 | 0.948182  |
| 1  | 2.335336  | -1.774865 | 0.268197  |
| 1  | 3.608893  | -2.240541 | -0.671388 |
| 7  | -2.090578 | 0.859192  | 1.841819  |
| 1  | -3.013305 | 1.281210  | 1.899181  |
| 1  | -1.653534 | 1.006703  | 2.747381  |
| 1  | -1.552235 | 1.400222  | 1.152225  |
| 7  | -0.399011 | 2.200564  | -0.400830 |
| 1  | 0.598631  | 2.064920  | -0.233686 |
| 1  | -0.684572 | 1.522374  | -1.111681 |
| 1  | -0.523150 | 3.130979  | -0.787559 |
| 7  | -2.493361 | -1.825651 | 0.223310  |
| 1  | -2.448738 | -1.040570 | 0.880465  |
| 1  | -3.340833 | -2.350937 | 0.412042  |
| 1  | -1.705996 | -2.436838 | 0.423498  |
| 7  | -1.635371 | -0.148192 | -2.223710 |
| 1  | -1.187202 | -0.736033 | -2.920404 |
| 1  | -2.085869 | -0.766418 | -1.539545 |
| 1  | -2.368915 | 0.365243  | -2.703457 |
| 7  | 0.431043  | -0.781567 | 0.431421  |
| 1  | -0.128681 | -0.644014 | -0.410299 |
| 1  | 1.049787  | 0.029878  | 0.471632  |
| 1  | -0.225679 | -0.668056 | 1.200917  |

-----

Cartesian coordinates of : AM7\_10

-----

Atomic number (AN) and Cartesian coordinates

| AN | X         | Y         | Z         |
|----|-----------|-----------|-----------|
| 7  | 1.774451  | -0.879919 | 1.557719  |
| 1  | 2.709483  | -0.520421 | 1.383258  |
| 1  | 1.689488  | -1.030958 | 2.558081  |
| 1  | 1.125447  | -0.135346 | 1.291585  |
| 7  | -0.224542 | 0.874612  | -0.096116 |
| 1  | 0.264699  | 0.547008  | -0.930831 |
| 1  | -0.836492 | 1.649291  | -0.355340 |
| 1  | -0.872040 | 0.127674  | 0.152909  |
| 7  | 2.219957  | -0.577477 | -1.541642 |
| 1  | 2.772843  | -0.764981 | -2.372080 |
| 1  | 2.343884  | -1.360208 | -0.903585 |
| 1  | 2.620675  | 0.238733  | -1.073192 |
| 7  | -0.284250 | -2.333041 | -0.365296 |
| 1  | 0.422883  | -2.165526 | 0.354207  |
| 1  | 0.063574  | -1.861190 | -1.198728 |
| 1  | -0.294996 | -3.329153 | -0.562922 |
| 7  | 2.670142  | 1.978333  | 0.295637  |
| 1  | 2.803781  | 2.815324  | -0.264019 |
| 1  | 3.069039  | 2.170949  | 1.209420  |

|   |           |           |           |
|---|-----------|-----------|-----------|
| 1 | 1.662788  | 1.842430  | 0.415198  |
| 7 | -3.057196 | -1.085550 | 0.390587  |
| 1 | -3.823805 | -1.483351 | -0.144270 |
| 1 | -3.246774 | -1.288950 | 1.367676  |
| 1 | -2.205655 | -1.597320 | 0.132900  |
| 7 | -3.091090 | 2.061420  | -0.288975 |
| 1 | -3.154598 | 1.067817  | -0.051153 |
| 1 | -3.528755 | 2.592100  | 0.457096  |
| 1 | -3.637777 | 2.217422  | -1.129617 |

-----

Cartesian coordinates of : AM7\_11

-----

Atomic number (AN) and Cartesian coordinates

| AN | X         | Y         | Z         |
|----|-----------|-----------|-----------|
| 7  | 1.862446  | 1.411970  | -1.055166 |
| 1  | 2.235713  | 1.860218  | -1.885936 |
| 1  | 1.478776  | 0.510677  | -1.334471 |
| 1  | 2.646704  | 1.209392  | -0.428991 |
| 7  | 1.950460  | -2.154194 | -0.073918 |
| 1  | 1.120377  | -1.669367 | -0.432420 |
| 1  | 1.622338  | -2.854209 | 0.585123  |
| 1  | 2.359798  | -2.660892 | -0.853589 |
| 7  | -0.618018 | -0.647944 | -1.087577 |
| 1  | -0.847482 | -0.522809 | -2.069724 |
| 1  | -0.743950 | 0.258689  | -0.637286 |
| 1  | -1.328189 | -1.270100 | -0.690441 |
| 7  | -0.554266 | 2.255075  | 0.622253  |
| 1  | -0.747193 | 3.252275  | 0.659018  |
| 1  | 0.290897  | 2.131539  | 0.047375  |
| 1  | -0.302939 | 1.975073  | 1.566793  |
| 7  | 3.857338  | 0.100572  | 0.949089  |
| 1  | 3.757322  | 0.283564  | 1.942291  |
| 1  | 4.833301  | -0.122140 | 0.782468  |
| 1  | 3.297104  | -0.726739 | 0.718057  |
| 7  | -3.460025 | 1.045592  | 0.132478  |
| 1  | -4.127785 | 1.644268  | 0.608679  |
| 1  | -3.655489 | 1.117183  | -0.861982 |
| 1  | -2.526097 | 1.439099  | 0.282788  |
| 7  | -2.974295 | -2.002202 | 0.495449  |
| 1  | -3.731212 | -2.584037 | 0.151462  |
| 1  | -3.303595 | -1.032423 | 0.528247  |
| 1  | -2.773892 | -2.301339 | 1.444285  |

-----

Cartesian coordinates of : AM7\_12

-----

Atomic number (AN) and Cartesian coordinates

| AN | X         | Y         | Z         |
|----|-----------|-----------|-----------|
| 7  | -3.735171 | -0.848542 | -0.097639 |
| 1  | -3.922292 | -0.712511 | -1.086764 |
| 1  | -3.599878 | 0.082057  | 0.312508  |
| 1  | -4.576084 | -1.247607 | 0.308030  |
| 7  | -2.838455 | 1.949949  | 0.879098  |
| 1  | -2.519148 | 2.081244  | 1.833628  |
| 1  | -3.259356 | 2.824710  | 0.582884  |
| 1  | -2.015560 | 1.772849  | 0.290388  |
| 7  | -0.610203 | 0.883149  | -0.958733 |
| 1  | -0.652898 | -0.095697 | -0.673484 |
| 1  | -0.872291 | 0.912846  | -1.939922 |
| 1  | 0.367558  | 1.176007  | -0.903910 |
| 7  | -0.951696 | -2.133326 | 0.324495  |
| 1  | -0.949993 | -3.133818 | 0.146707  |
| 1  | -1.918640 | -1.804679 | 0.208203  |
| 1  | -0.712002 | -2.012751 | 1.304851  |
| 7  | 2.466541  | 1.818322  | -0.628917 |
| 1  | 3.150000  | 1.986676  | -1.361572 |
| 1  | 2.204384  | 2.729862  | -0.264312 |

|   |          |           |           |
|---|----------|-----------|-----------|
| 1 | 2.946999 | 1.312832  | 0.123293  |
| 7 | 3.692749 | -0.232150 | 1.368900  |
| 1 | 3.313229 | -0.336768 | 2.304394  |
| 1 | 4.672438 | -0.493204 | 1.413094  |
| 1 | 3.210628 | -0.894876 | 0.752926  |
| 7 | 1.969468 | -1.433576 | -0.871724 |
| 1 | 1.942734 | -0.471233 | -1.206337 |
| 1 | 1.015639 | -1.676761 | -0.596463 |
| 1 | 2.221895 | -2.025966 | -1.656511 |

-----

Cartesian coordinates of : AM7\_13

-----

Atomic number (AN) and Cartesian coordinates

| AN | X         | Y         | Z         |
|----|-----------|-----------|-----------|
| 7  | 3.389282  | 0.270266  | -0.417704 |
| 1  | 3.270426  | -0.743117 | -0.332153 |
| 1  | 4.051077  | 0.562905  | 0.295333  |
| 1  | 3.819850  | 0.456679  | -1.318184 |
| 7  | 1.461946  | 2.938814  | 0.248306  |
| 1  | 2.063578  | 2.176225  | -0.058546 |
| 1  | 0.499585  | 2.660842  | 0.066143  |
| 1  | 1.667548  | 3.750743  | -0.324608 |
| 7  | 2.213829  | -2.589238 | 0.077149  |
| 1  | 1.364709  | -2.066623 | 0.297032  |
| 1  | 2.444059  | -3.167317 | 0.879063  |
| 1  | 2.001187  | -3.215994 | -0.692452 |
| 7  | -1.680890 | -2.363915 | -0.185907 |
| 1  | -0.942357 | -1.712134 | 0.096434  |
| 1  | -1.644410 | -3.169155 | 0.431036  |
| 1  | -1.464388 | -2.693058 | -1.121595 |
| 7  | -1.800630 | 2.140954  | -0.214425 |
| 1  | -2.561646 | 1.452708  | -0.173867 |
| 1  | -1.993537 | 2.848187  | 0.489372  |
| 1  | -1.858457 | 2.601537  | -1.118071 |
| 7  | -3.893573 | -0.164494 | -0.033431 |
| 1  | -3.273561 | -0.979102 | -0.088727 |
| 1  | -4.392743 | -0.219687 | 0.849167  |
| 1  | -4.587805 | -0.254832 | -0.768877 |
| 7  | 0.339140  | -0.105700 | 0.605339  |
| 1  | -0.359388 | 0.572837  | 0.287204  |
| 1  | 0.473710  | 0.093229  | 1.594470  |
| 1  | 1.218839  | 0.158320  | 0.156543  |

-----

Cartesian coordinates of : AM7\_14

-----

Atomic number (AN) and Cartesian coordinates

| AN | X         | Y         | Z         |
|----|-----------|-----------|-----------|
| 7  | -0.918735 | -0.258339 | -0.193068 |
| 1  | -1.927846 | -0.404996 | -0.249392 |
| 1  | -0.464954 | -1.123293 | -0.482433 |
| 1  | -0.652084 | 0.432463  | -0.898965 |
| 7  | 0.849911  | 1.972407  | -1.497868 |
| 1  | 1.741499  | 1.562460  | -1.226520 |
| 1  | 0.503239  | 2.464791  | -0.671522 |
| 1  | 1.026229  | 2.656705  | -2.226058 |
| 7  | 2.124118  | 0.397992  | 0.855597  |
| 1  | 2.324645  | -0.413273 | 1.439421  |
| 1  | 1.106464  | 0.439342  | 0.784886  |
| 1  | 2.434411  | 1.235266  | 1.338936  |
| 7  | 1.109208  | -2.401760 | 1.403131  |
| 1  | 0.241706  | -1.907217 | 1.595564  |
| 1  | 1.216973  | -2.423914 | 0.388349  |
| 1  | 1.007647  | -3.354329 | 1.736427  |
| 7  | -4.123956 | -0.765340 | -0.317046 |
| 1  | -4.298283 | -1.728353 | -0.585878 |
| 1  | -4.583458 | -0.171116 | -0.999444 |

|   |           |           |           |
|---|-----------|-----------|-----------|
| 1 | -4.577051 | -0.611414 | 0.577813  |
| 7 | -0.505071 | 2.430014  | 1.350291  |
| 1 | -1.347460 | 2.993777  | 1.407055  |
| 1 | -0.783862 | 1.463564  | 1.165168  |
| 1 | -0.065883 | 2.458273  | 2.265253  |
| 7 | 1.668408  | -1.391505 | -1.601893 |
| 1 | 1.149170  | -0.789008 | -2.236447 |
| 1 | 2.166798  | -0.769290 | -0.961105 |
| 1 | 2.354914  | -1.894727 | -2.155118 |

-----

Cartesian coordinates of : AM7\_15

-----

Atomic number (AN) and Cartesian coordinates

| AN | X         | Y         | Z         |
|----|-----------|-----------|-----------|
| 7  | -0.675656 | 2.238932  | -1.231554 |
| 1  | -0.814121 | 2.074312  | -2.224207 |
| 1  | -0.781435 | 3.238522  | -1.086392 |
| 1  | -1.429910 | 1.762387  | -0.722159 |
| 7  | -2.294928 | 0.372674  | 0.566444  |
| 1  | -1.581831 | -0.309168 | 0.295815  |
| 1  | -3.209963 | -0.077306 | 0.529204  |
| 1  | -2.119295 | 0.626009  | 1.534150  |
| 7  | 0.135827  | -0.992839 | -0.909063 |
| 1  | 1.037978  | -1.451103 | -0.740737 |
| 1  | 0.325889  | -0.049328 | -1.244807 |
| 1  | -0.315884 | -1.494575 | -1.668275 |
| 7  | 2.935036  | -2.244051 | -0.235584 |
| 1  | 2.923726  | -2.788405 | 0.621420  |
| 1  | 3.441436  | -2.789405 | -0.926034 |
| 1  | 3.473534  | -1.390594 | -0.052946 |
| 7  | 4.111940  | 0.560828  | 0.370416  |
| 1  | 4.365213  | 1.136896  | -0.426293 |
| 1  | 4.771581  | 0.772992  | 1.112116  |
| 1  | 3.178093  | 0.852755  | 0.681270  |
| 7  | -5.219157 | -1.009697 | 0.308350  |
| 1  | -5.911193 | -0.692410 | 0.979153  |
| 1  | -5.555385 | -0.764090 | -0.617074 |
| 1  | -5.180848 | -2.022219 | 0.362957  |
| 7  | 1.156274  | 1.086948  | 1.140302  |
| 1  | 0.889538  | 1.539405  | 2.009177  |
| 1  | 0.754508  | 0.151466  | 1.142266  |
| 1  | 0.693011  | 1.584287  | 0.376224  |

-----

Cartesian coordinates of : AM7\_16

-----

Atomic number (AN) and Cartesian coordinates

| AN | X         | Y         | Z         |
|----|-----------|-----------|-----------|
| 7  | -1.415721 | -1.334234 | -0.501869 |
| 1  | -1.921368 | -2.166737 | -0.214219 |
| 1  | -1.388680 | -1.343328 | -1.517163 |
| 1  | -1.974667 | -0.526374 | -0.219797 |
| 7  | -2.897926 | 1.360130  | 0.388704  |
| 1  | -3.581882 | 1.916574  | -0.116621 |
| 1  | -1.964326 | 1.711290  | 0.146594  |
| 1  | -3.047056 | 1.542734  | 1.376921  |
| 7  | 1.373670  | -0.662400 | 0.802004  |
| 1  | 1.283701  | -0.742466 | 1.811108  |
| 1  | 2.165051  | -1.250774 | 0.527044  |
| 1  | 0.519638  | -1.057611 | 0.396706  |
| 7  | 3.673414  | 1.351328  | -0.059088 |
| 1  | 3.471852  | 1.898309  | -0.889982 |
| 1  | 3.991717  | 1.996188  | 0.657038  |
| 1  | 2.798759  | 0.926099  | 0.257029  |
| 7  | -5.091538 | -0.956846 | -0.029490 |
| 1  | -4.937402 | -1.524683 | -0.855653 |
| 1  | -4.267981 | -0.374158 | 0.112984  |

|   |           |           |           |
|---|-----------|-----------|-----------|
| 1 | -5.184633 | -1.581840 | 0.763807  |
| 7 | 4.215069  | -1.711098 | -0.121905 |
| 1 | 4.914777  | -2.093046 | 0.506021  |
| 1 | 4.364642  | -2.137190 | -1.030729 |
| 1 | 4.380242  | -0.706061 | -0.210691 |
| 7 | 0.029512  | 1.923104  | -0.453570 |
| 1 | 0.522821  | 2.775209  | -0.204544 |
| 1 | 0.520944  | 1.141097  | -0.011401 |
| 1 | 0.128495  | 1.806878  | -1.457957 |

-----

Cartesian coordinates of ammonia octamer: (NH<sub>3</sub>)<sub>8</sub>

Cartesian coordinates of : AM8\_1

-----

Atomic number (AN) and Cartesian coordinates

| AN | X         | Y         | Z         |
|----|-----------|-----------|-----------|
| 7  | -2.523140 | -0.428678 | -1.580651 |
| 1  | -1.659312 | -0.130291 | -2.035604 |
| 1  | -3.247280 | -0.497662 | -2.288145 |
| 1  | -2.788662 | 0.306064  | -0.928190 |
| 7  | 0.501183  | 0.242218  | 2.096237  |
| 1  | 0.724151  | 0.611732  | 3.015729  |
| 1  | 1.305962  | -0.305612 | 1.782216  |
| 1  | 0.410646  | 1.036604  | 1.459475  |
| 7  | -0.534203 | 2.122722  | -0.237363 |
| 1  | -0.379640 | 1.492849  | -1.027596 |
| 1  | -0.731193 | 3.044053  | -0.616774 |
| 1  | -1.377382 | 1.800922  | 0.242303  |
| 7  | 2.532390  | -1.571045 | 0.449727  |
| 1  | 2.920261  | -1.156448 | -0.394094 |
| 1  | 3.154623  | -2.320384 | 0.736028  |
| 1  | 1.634696  | -1.987562 | 0.191706  |
| 7  | -0.578227 | -2.106195 | 0.202318  |
| 1  | -1.367636 | -1.794900 | -0.370800 |
| 1  | -0.809235 | -3.022481 | 0.574570  |
| 1  | -0.500018 | -1.463163 | 0.991765  |
| 7  | 2.603762  | 1.517554  | -0.369588 |
| 1  | 3.330273  | 2.218496  | -0.473415 |
| 1  | 1.734258  | 1.994306  | -0.125931 |
| 1  | 2.850739  | 0.924717  | 0.419548  |
| 7  | 0.609772  | -0.189465 | -2.094155 |
| 1  | 1.434320  | 0.320675  | -1.767201 |
| 1  | 0.823227  | -0.569942 | -3.011239 |
| 1  | 0.463452  | -0.977773 | -1.461450 |
| 7  | -2.611319 | 0.411158  | 1.499194  |
| 1  | -1.703840 | 0.192897  | 1.917617  |
| 1  | -3.007050 | -0.467723 | 1.174944  |
| 1  | -3.216874 | 0.762740  | 2.234502  |

-----

Cartesian coordinates of : AM8\_2

-----

Atomic number (AN) and Cartesian coordinates

| AN | X         | Y         | Z         |
|----|-----------|-----------|-----------|
| 7  | 0.935714  | 0.963209  | 1.682618  |
| 1  | 1.183814  | 1.137786  | 2.651646  |
| 1  | 0.470147  | 0.053603  | 1.645682  |
| 1  | 0.241697  | 1.658774  | 1.411621  |
| 7  | -0.543150 | -1.855828 | 1.077356  |
| 1  | -1.174888 | -1.942569 | 0.280269  |
| 1  | -0.832413 | -2.539499 | 1.770597  |
| 1  | 0.394510  | -2.116528 | 0.755296  |
| 7  | 2.435551  | -2.092222 | 0.048166  |
| 1  | 2.760832  | -1.181104 | -0.292453 |
| 1  | 3.025886  | -2.343780 | 0.835789  |

|   |           |           |           |
|---|-----------|-----------|-----------|
| 1 | 2.614146  | -2.774904 | -0.682469 |
| 7 | 2.908202  | 0.891114  | -0.687907 |
| 1 | 3.775058  | 1.415596  | -0.630543 |
| 1 | 2.365949  | 1.055514  | 0.168739  |
| 1 | 2.367747  | 1.270159  | -1.460513 |
| 7 | -2.873850 | -1.277922 | -1.196646 |
| 1 | -3.020837 | -0.520316 | -0.518840 |
| 1 | -3.183432 | -0.948248 | -2.106346 |
| 1 | -3.488275 | -2.046076 | -0.943120 |
| 7 | -2.492628 | 0.737819  | 1.045651  |
| 1 | -1.966301 | 1.541901  | 0.700176  |
| 1 | -1.809219 | 0.062667  | 1.390607  |
| 1 | -3.047856 | 1.050716  | 1.835663  |
| 7 | 0.106017  | -0.097303 | -1.495851 |
| 1 | 0.592265  | -0.417931 | -2.329002 |
| 1 | -0.784687 | -0.596949 | -1.459173 |
| 1 | 0.657910  | -0.425538 | -0.704306 |
| 7 | -0.495977 | 2.751123  | -0.465325 |
| 1 | -0.268006 | 1.884219  | -0.967473 |
| 1 | -1.100549 | 3.308455  | -1.061459 |
| 1 | 0.367351  | 3.274104  | -0.346813 |

-----

Cartesian coordinates of : AM8\_3

-----

Atomic number (AN) and Cartesian coordinates

| AN | X         | Y         | Z         |
|----|-----------|-----------|-----------|
| 7  | 1.510915  | 2.282914  | -0.544712 |
| 1  | 1.900292  | 3.116240  | -0.974881 |
| 1  | 2.287550  | 1.651262  | -0.324150 |
| 1  | 1.105556  | 2.558532  | 0.346329  |
| 7  | 3.587961  | 0.058006  | 0.259542  |
| 1  | 3.922267  | -0.028644 | 1.214773  |
| 1  | 4.410494  | 0.129115  | -0.332238 |
| 1  | 3.104072  | -0.815109 | 0.016825  |
| 7  | 1.675605  | -2.223629 | -0.465985 |
| 1  | 1.004654  | -1.621345 | -0.957472 |
| 1  | 1.916567  | -3.000583 | -1.073278 |
| 1  | 1.188855  | -2.602915 | 0.342092  |
| 7  | -0.346994 | -0.103705 | -1.521169 |
| 1  | -0.708577 | -0.028385 | -2.467576 |
| 1  | 0.216973  | 0.733451  | -1.342874 |
| 1  | -1.149433 | -0.059119 | -0.894274 |
| 7  | -1.510918 | -2.282909 | 0.544718  |
| 1  | -1.900298 | -3.116232 | 0.974891  |
| 1  | -2.287552 | -1.651258 | 0.324148  |
| 1  | -1.105555 | -2.558535 | -0.346319 |
| 7  | -3.587960 | -0.058007 | -0.259553 |
| 1  | -3.104071 | 0.815108  | -0.016833 |
| 1  | -4.410496 | -0.129116 | 0.332223  |
| 1  | -3.922261 | 0.028646  | -1.214786 |
| 7  | 0.346997  | 0.103705  | 1.521173  |
| 1  | -0.216973 | -0.733449 | 1.342877  |
| 1  | 0.708588  | 0.028377  | 2.467576  |
| 1  | 1.149431  | 0.059120  | 0.894272  |
| 7  | -1.675606 | 2.223626  | 0.465987  |
| 1  | -1.004659 | 1.621346  | 0.957484  |
| 1  | -1.188848 | 2.602908  | -0.342087 |
| 1  | -1.916576 | 3.000582  | 1.073273  |

-----

Cartesian coordinates of : AM8\_4

-----

Atomic number (AN) and Cartesian coordinates

| AN | X        | Y        | Z         |
|----|----------|----------|-----------|
| 7  | 0.527787 | 1.685689 | -1.279682 |
| 1  | 0.437310 | 2.248801 | -2.119497 |
| 1  | 0.283254 | 0.720577 | -1.519147 |

|   |           |           |           |
|---|-----------|-----------|-----------|
| 1 | -0.160827 | 2.019738  | -0.605529 |
| 7 | -0.033570 | -1.424054 | -1.542632 |
| 1 | -0.102157 | -1.933985 | -2.418381 |
| 1 | 0.875759  | -1.647001 | -1.124848 |
| 1 | -0.751104 | -1.793911 | -0.919630 |
| 7 | 3.154960  | 1.315932  | 0.302645  |
| 1 | 3.978177  | 1.708231  | -0.144678 |
| 1 | 3.042862  | 1.803489  | 1.186766  |
| 1 | 2.340093  | 1.551233  | -0.278691 |
| 7 | 2.672561  | -1.732324 | 0.050867  |
| 1 | 2.534000  | -2.154018 | 0.964778  |
| 1 | 2.996720  | -0.769149 | 0.195990  |
| 1 | 3.422088  | -2.246850 | -0.401349 |
| 7 | -2.802667 | 0.092317  | -0.968701 |
| 1 | -2.732580 | -0.768750 | -0.422768 |
| 1 | -2.002410 | 0.082624  | -1.598149 |
| 1 | -3.644188 | 0.041154  | -1.533889 |
| 7 | -1.859604 | 2.319702  | 0.909363  |
| 1 | -2.362835 | 1.644387  | 0.320233  |
| 1 | -2.090553 | 3.252994  | 0.581427  |
| 1 | -2.229613 | 2.244077  | 1.852615  |
| 7 | -1.900053 | -2.201587 | 1.042880  |
| 1 | -1.181874 | -1.538890 | 1.362479  |
| 1 | -2.662003 | -2.181392 | 1.714519  |
| 1 | -1.501079 | -3.134993 | 1.084073  |
| 7 | 0.246418  | -0.041072 | 1.443209  |
| 1 | 0.803882  | -0.189025 | 0.603001  |
| 1 | -0.242427 | 0.846903  | 1.312352  |
| 1 | 0.908673  | 0.091533  | 2.202673  |

-----

Cartesian coordinates of : AM8\_5

-----

Atomic number (AN) and Cartesian coordinates

| AN | X         | Y         | Z         |
|----|-----------|-----------|-----------|
| 7  | -1.102379 | 0.196486  | -2.006145 |
| 1  | -1.230985 | -0.716947 | -1.568941 |
| 1  | -1.487180 | 0.139413  | -2.944270 |
| 1  | -0.098047 | 0.348849  | -2.102290 |
| 7  | 2.121448  | -0.115774 | 2.161884  |
| 1  | 3.046020  | -0.459567 | 1.917874  |
| 1  | 1.909575  | 0.681524  | 1.547023  |
| 1  | 2.181798  | 0.234533  | 3.113523  |
| 7  | -2.121448 | 2.161884  | 0.115774  |
| 1  | -2.181798 | 3.113523  | -0.234533 |
| 1  | -3.046020 | 1.917875  | 0.459567  |
| 1  | -1.909575 | 1.547023  | -0.681524 |
| 7  | 1.102379  | 2.006145  | 0.196486  |
| 1  | 1.487180  | 2.944270  | 0.139413  |
| 1  | 0.098046  | 2.102290  | 0.348850  |
| 1  | 1.230984  | 1.568941  | -0.716947 |
| 7  | 1.102379  | -2.006145 | -0.196486 |
| 1  | 0.098047  | -2.102290 | -0.348850 |
| 1  | 1.230985  | -1.568941 | 0.716947  |
| 1  | 1.487180  | -2.944270 | -0.139413 |
| 7  | 2.121448  | 0.115774  | -2.161884 |
| 1  | 1.909575  | -0.681524 | -1.547023 |
| 1  | 3.046020  | 0.459567  | -1.917874 |
| 1  | 2.181798  | -0.234533 | -3.113523 |
| 7  | -2.121448 | -2.161885 | -0.115774 |
| 1  | -1.909575 | -1.547023 | 0.681524  |
| 1  | -3.046020 | -1.917875 | -0.459567 |
| 1  | -2.181798 | -3.113523 | 0.234533  |
| 7  | -1.102379 | -0.196486 | 2.006145  |
| 1  | -1.487180 | -0.139413 | 2.944270  |
| 1  | -0.098047 | -0.348849 | 2.102290  |
| 1  | -1.230985 | 0.716947  | 1.568941  |

-----

Cartesian coordinates of : AM8\_6

-----  
Atomic number (AN) and Cartesian coordinates

| AN | X         | Y         | Z         |
|----|-----------|-----------|-----------|
| 7  | 2.065824  | 1.755158  | -1.263051 |
| 1  | 3.030793  | 1.507030  | -1.462702 |
| 1  | 1.976660  | 2.747573  | -1.462444 |
| 1  | 1.914688  | 1.626533  | -0.253352 |
| 7  | 1.756241  | -2.066134 | 1.261387  |
| 1  | 2.748815  | -1.976953 | 1.459977  |
| 1  | 1.508331  | -3.031156 | 1.461048  |
| 1  | 1.626771  | -1.914792 | 0.251827  |
| 7  | -1.112815 | 1.308419  | -1.640764 |
| 1  | -1.486747 | 1.747888  | -2.476433 |
| 1  | -1.348620 | 0.316308  | -1.691374 |
| 1  | -0.095672 | 1.380579  | -1.692318 |
| 7  | -2.067219 | -1.755900 | -1.260310 |
| 1  | -1.978286 | -2.748422 | -1.459272 |
| 1  | -3.032388 | -1.507852 | -1.459087 |
| 1  | -1.915020 | -1.626737 | -0.250841 |
| 7  | -1.754826 | 2.066902  | 1.261974  |
| 1  | -2.747187 | 1.977963  | 1.461736  |
| 1  | -1.626502 | 1.914913  | 0.252365  |
| 1  | -1.506582 | 3.032023  | 1.460743  |
| 7  | 1.309741  | 1.112402  | 1.640150  |
| 1  | 0.317663  | 1.348182  | 1.691526  |
| 1  | 1.749824  | 1.486201  | 2.475555  |
| 1  | 1.381962  | 0.095252  | 1.691472  |
| 7  | -1.308037 | -1.111499 | 1.641712  |
| 1  | -1.380191 | -0.094319 | 1.692532  |
| 1  | -1.747267 | -1.484805 | 2.477787  |
| 1  | -0.315909 | -1.347248 | 1.692233  |
| 7  | 1.111080  | -1.309364 | -1.641098 |
| 1  | 1.346799  | -0.317267 | -1.692386 |
| 1  | 1.484253  | -1.749206 | -2.476911 |
| 1  | 0.093893  | -1.381584 | -1.691684 |

-----  
Cartesian coordinates of : AM8\_7-----  
Atomic number (AN) and Cartesian coordinates

| AN | X         | Y         | Z         |
|----|-----------|-----------|-----------|
| 7  | 2.399881  | 0.509968  | -1.733594 |
| 1  | 2.941528  | 0.213730  | -0.913486 |
| 1  | 2.757806  | 1.413438  | -2.029790 |
| 1  | 2.604548  | -0.146104 | -2.482055 |
| 7  | -0.773651 | 0.102343  | -1.680414 |
| 1  | -1.240560 | 0.734761  | -1.029039 |
| 1  | -1.152695 | 0.304340  | -2.601634 |
| 1  | 0.216614  | 0.362929  | -1.703078 |
| 7  | -1.957306 | 2.672053  | -0.004702 |
| 1  | -1.991484 | 3.153072  | -0.898500 |
| 1  | -0.976241 | 2.616674  | 0.290966  |
| 1  | -2.455403 | 3.254654  | 0.661659  |
| 7  | 0.696325  | 1.543201  | 0.947634  |
| 1  | 1.381457  | 1.850541  | 1.631060  |
| 1  | 1.212859  | 1.095125  | 0.191451  |
| 1  | 0.122491  | 0.819341  | 1.384228  |
| 7  | -2.505226 | -2.309968 | -0.593324 |
| 1  | -3.337636 | -2.402741 | -1.166825 |
| 1  | -2.064867 | -3.223517 | -0.552763 |
| 1  | -1.861978 | -1.669171 | -1.067080 |
| 7  | 0.636431  | -1.801452 | 0.563752  |
| 1  | 0.551289  | -2.812656 | 0.612110  |
| 1  | 0.412828  | -1.521596 | -0.391077 |
| 1  | -0.114636 | -1.406479 | 1.133403  |
| 7  | -1.944013 | -0.170502 | 1.592492  |
| 1  | -2.383233 | -0.114140 | 2.506486  |
| 1  | -2.361811 | -0.959912 | 1.092734  |



|   |           |           |          |
|---|-----------|-----------|----------|
| 1 | -2.206048 | 0.671838  | 1.077032 |
| 7 | 3.419232  | -0.545675 | 0.968123 |
| 1 | 4.143669  | -1.253129 | 1.044582 |
| 1 | 2.507931  | -1.020634 | 0.995506 |
| 1 | 3.491858  | 0.039866  | 1.794339 |

-----

Cartesian coordinates of : AM8\_8

-----

Atomic number (AN) and Cartesian coordinates

| AN | X         | Y         | Z         |
|----|-----------|-----------|-----------|
| 7  | -3.709735 | -0.010186 | 0.172890  |
| 1  | -4.586752 | -0.216178 | -0.295054 |
| 1  | -3.898325 | 0.003782  | 1.170536  |
| 1  | -3.064553 | -0.783049 | -0.008049 |
| 7  | -1.374867 | -2.032292 | -0.682506 |
| 1  | -0.453087 | -2.309324 | -0.327686 |
| 1  | -1.184409 | -1.381346 | -1.443984 |
| 1  | -1.811730 | -2.857722 | -1.081704 |
| 7  | 1.474747  | -2.076986 | 0.702085  |
| 1  | 2.319464  | -1.634269 | 0.330378  |
| 1  | 1.766568  | -2.882916 | 1.246750  |
| 1  | 1.058984  | -1.402523 | 1.345992  |
| 7  | -1.495125 | 2.022578  | -0.704731 |
| 1  | -1.057326 | 1.396389  | -1.381964 |
| 1  | -1.684765 | 2.902269  | -1.175618 |
| 1  | -2.396224 | 1.598149  | -0.467300 |
| 7  | 1.474042  | 2.051344  | 0.711458  |
| 1  | 1.854602  | 2.880324  | 1.157872  |
| 1  | 1.222070  | 1.389223  | 1.444665  |
| 1  | 0.583286  | 2.313895  | 0.282756  |
| 7  | 3.672536  | -0.014788 | -0.277476 |
| 1  | 3.038041  | 0.763193  | -0.072738 |
| 1  | 4.512663  | 0.116502  | 0.277719  |
| 1  | 3.949592  | 0.057270  | -1.251749 |
| 7  | -0.722042 | 0.030852  | 1.662189  |
| 1  | -1.155838 | -0.755687 | 1.176709  |
| 1  | -1.092516 | 0.053617  | 2.607753  |
| 1  | -1.049106 | 0.871370  | 1.182043  |
| 7  | 0.679994  | 0.015952  | -1.630615 |
| 1  | 1.193552  | -0.807025 | -1.938468 |
| 1  | 1.264489  | 0.822208  | -1.840383 |
| 1  | 0.674469  | -0.043475 | -0.611540 |

-----

Cartesian coordinates of : AM8\_9

-----

Atomic number (AN) and Cartesian coordinates

| AN | X         | Y         | Z         |
|----|-----------|-----------|-----------|
| 7  | 2.484823  | 0.837872  | -1.768769 |
| 1  | 2.597385  | 0.879035  | -0.754627 |
| 1  | 3.400380  | 0.929183  | -2.196678 |
| 1  | 1.940198  | 1.659206  | -2.016578 |
| 7  | -2.582720 | -1.474519 | -0.935930 |
| 1  | -2.954861 | -1.564723 | -1.876975 |
| 1  | -2.800081 | -2.341180 | -0.452193 |
| 1  | -1.562155 | -1.424455 | -1.017210 |
| 7  | 1.754126  | 1.519193  | 1.230916  |
| 1  | 1.173889  | 1.074441  | 1.943012  |
| 1  | 1.092874  | 1.864778  | 0.529052  |
| 1  | 2.214254  | 2.319421  | 1.653784  |
| 7  | -0.487565 | 1.590660  | -0.942664 |
| 1  | -1.325824 | 1.633349  | -0.360722 |
| 1  | -0.318404 | 0.606283  | -1.153507 |
| 1  | -0.713871 | 2.048679  | -1.820887 |
| 7  | 0.596003  | -1.565836 | -1.269851 |
| 1  | 1.229990  | -0.887383 | -1.705171 |
| 1  | 1.106357  | -1.902262 | -0.446783 |

|   |           |           |           |
|---|-----------|-----------|-----------|
| 1 | 0.511735  | -2.349838 | -1.911836 |
| 7 | 2.210823  | -1.622082 | 1.377594  |
| 1 | 3.083828  | -2.092577 | 1.592793  |
| 1 | 2.412686  | -0.635707 | 1.203507  |
| 1 | 1.631817  | -1.638059 | 2.212982  |
| 7 | -0.601830 | -0.365049 | 1.753460  |
| 1 | -0.223397 | -0.691594 | 0.863389  |
| 1 | -1.127832 | -1.143352 | 2.142164  |
| 1 | -1.283846 | 0.359262  | 1.528178  |
| 7 | -3.268581 | 1.127125  | 0.608546  |
| 1 | -3.738789 | 0.959593  | 1.493228  |
| 1 | -3.224953 | 0.239470  | 0.095004  |
| 1 | -3.856934 | 1.766890  | 0.082955  |

-----

Cartesian coordinates of : AM8\_10

-----

Atomic number (AN) and Cartesian coordinates

| AN | X         | Y         | Z         |
|----|-----------|-----------|-----------|
| 7  | 1.617792  | 2.421095  | 0.733674  |
| 1  | 2.305528  | 1.872343  | 0.204111  |
| 1  | 1.648286  | 3.374504  | 0.385156  |
| 1  | 1.936216  | 2.449755  | 1.698223  |
| 7  | -0.530046 | -1.960847 | 1.415044  |
| 1  | -0.509866 | -2.620928 | 2.186657  |
| 1  | -1.362328 | -2.159570 | 0.854622  |
| 1  | -0.681148 | -1.024543 | 1.804141  |
| 7  | 3.363498  | 0.486863  | -0.938623 |
| 1  | 3.259516  | 0.588499  | -1.944228 |
| 1  | 2.972399  | -0.426970 | -0.677752 |
| 1  | 4.362000  | 0.451725  | -0.754874 |
| 7  | 2.199694  | -2.289206 | -0.081998 |
| 1  | 2.013725  | -2.970254 | -0.813111 |
| 1  | 1.319462  | -2.159632 | 0.433727  |
| 1  | 2.856850  | -2.729380 | 0.556236  |
| 7  | -1.168484 | 1.073582  | 1.742791  |
| 1  | -0.364411 | 1.584160  | 1.373071  |
| 1  | -1.920070 | 1.140588  | 1.057156  |
| 1  | -1.480067 | 1.552123  | 2.582022  |
| 7  | -0.036186 | 0.155566  | -1.061294 |
| 1  | -0.170039 | -0.569017 | -0.354427 |
| 1  | 0.582814  | -0.248891 | -1.759210 |
| 1  | 0.506549  | 0.882402  | -0.591999 |
| 7  | -2.778227 | -1.540541 | -0.712353 |
| 1  | -3.026925 | -0.600314 | -0.405868 |
| 1  | -3.631203 | -2.014402 | -0.991288 |
| 1  | -2.202517 | -1.419472 | -1.541194 |
| 7  | -2.750284 | 1.610581  | -1.009341 |
| 1  | -2.615545 | 2.602257  | -0.834715 |
| 1  | -1.843327 | 1.213336  | -1.279594 |
| 1  | -3.380191 | 1.532044  | -1.802168 |

-----

Cartesian coordinates of : AM8\_11

-----

Atomic number (AN) and Cartesian coordinates

| AN | X         | Y         | Z         |
|----|-----------|-----------|-----------|
| 7  | 1.727662  | -2.666042 | -0.493819 |
| 1  | 1.973868  | -3.588312 | -0.147486 |
| 1  | 1.868688  | -2.678434 | -1.499918 |
| 1  | 2.397623  | -1.995746 | -0.100688 |
| 7  | -0.724526 | 2.863129  | 0.084687  |
| 1  | -1.139475 | 3.789054  | 0.048920  |
| 1  | -1.320575 | 2.230890  | -0.460428 |
| 1  | -0.778487 | 2.543394  | 1.048554  |
| 7  | -1.500051 | -2.215861 | -0.888701 |
| 1  | -1.952093 | -3.069583 | -1.200155 |
| 1  | -1.966868 | -1.917685 | -0.032320 |

|   |           |           |           |
|---|-----------|-----------|-----------|
| 1 | -0.530252 | -2.442154 | -0.662155 |
| 7 | -2.565253 | 0.642598  | -1.228040 |
| 1 | -3.014190 | 0.305718  | -0.375178 |
| 1 | -2.193660 | -0.201083 | -1.668093 |
| 1 | -3.287582 | 1.019247  | -1.834212 |
| 7 | 2.219800  | 2.213116  | -0.713310 |
| 1 | 2.865467  | 2.996370  | -0.751290 |
| 1 | 1.288663  | 2.588643  | -0.497185 |
| 1 | 2.165787  | 1.829978  | -1.653431 |
| 7 | 3.331914  | -0.340047 | 0.847885  |
| 1 | 3.058044  | 0.521502  | 0.364869  |
| 1 | 4.343298  | -0.333690 | 0.938868  |
| 1 | 2.952159  | -0.285604 | 1.789365  |
| 7 | 0.115485  | -0.001765 | 0.567550  |
| 1 | -0.437974 | 0.166374  | -0.273047 |
| 1 | 0.836000  | 0.716517  | 0.571042  |
| 1 | 0.593934  | -0.889154 | 0.415347  |
| 7 | -2.642212 | -0.506020 | 1.777293  |
| 1 | -2.702416 | -1.258946 | 2.456308  |
| 1 | -1.651303 | -0.267283 | 1.656427  |
| 1 | -3.108386 | 0.296228  | 2.191070  |

-----

Cartesian coordinates of : AM8\_12

-----

Atomic number (AN) and Cartesian coordinates

| AN | X         | Y         | Z         |
|----|-----------|-----------|-----------|
| 7  | -0.024094 | -0.082053 | 0.271799  |
| 1  | -0.758491 | -0.598565 | -0.209373 |
| 1  | 0.859905  | -0.344031 | -0.161339 |
| 1  | -0.177625 | 0.907002  | 0.082746  |
| 7  | 2.668427  | -1.761764 | -0.775565 |
| 1  | 3.528176  | -2.278816 | -0.615222 |
| 1  | 2.588836  | -1.640466 | -1.781151 |
| 1  | 1.889053  | -2.360243 | -0.475167 |
| 7  | 0.130962  | -3.061316 | 0.414564  |
| 1  | 0.126754  | -2.389755 | 1.179686  |
| 1  | -0.714704 | -2.867999 | -0.128174 |
| 1  | 0.041307  | -3.990879 | 0.812011  |
| 7  | 1.513926  | 2.659447  | -0.861810 |
| 1  | 1.993812  | 2.157047  | -0.104833 |
| 1  | 1.635287  | 2.098037  | -1.700781 |
| 1  | 2.019049  | 3.526959  | -1.018107 |
| 7  | -1.529513 | 3.022600  | -0.285058 |
| 1  | -2.007382 | 3.283331  | -1.142631 |
| 1  | -1.686443 | 3.774518  | 0.379708  |
| 1  | -0.523700 | 3.000895  | -0.489168 |
| 7  | -2.569265 | -1.953520 | -0.950939 |
| 1  | -2.886958 | -1.180293 | -0.353819 |
| 1  | -2.620667 | -1.636729 | -1.914746 |
| 1  | -3.240552 | -2.710058 | -0.856621 |
| 7  | -2.880870 | 0.424955  | 0.992970  |
| 1  | -2.531278 | 1.285223  | 0.560217  |
| 1  | -3.685318 | 0.668424  | 1.562175  |
| 1  | -2.141843 | 0.108621  | 1.617197  |
| 7  | 2.700290  | 0.738140  | 1.253959  |
| 1  | 1.859603  | 0.501368  | 1.775865  |
| 1  | 3.465338  | 0.844340  | 1.911555  |
| 1  | 2.898795  | -0.063357 | 0.650529  |

-----

Cartesian coordinates of : AM8\_13

-----

Atomic number (AN) and Cartesian coordinates

| AN | X         | Y        | Z        |
|----|-----------|----------|----------|
| 7  | 0.226871  | 2.517180 | 0.403103 |
| 1  | -0.597874 | 2.976274 | 0.779701 |
| 1  | 0.858241  | 3.249951 | 0.093460 |

|   |           |           |           |
|---|-----------|-----------|-----------|
| 1 | -0.070124 | 1.982748  | -0.419829 |
| 7 | -0.082329 | -2.576588 | 0.379205  |
| 1 | 0.195736  | -3.551935 | 0.401067  |
| 1 | -0.797788 | -2.463851 | -0.338015 |
| 1 | 0.726214  | -2.017255 | 0.108724  |
| 7 | -1.197137 | -0.011479 | 1.773314  |
| 1 | -0.800715 | -0.932867 | 1.568291  |
| 1 | -1.355652 | 0.036922  | 2.775466  |
| 1 | -0.482883 | 0.680753  | 1.547466  |
| 7 | -2.889205 | -1.492690 | -0.634437 |
| 1 | -3.434286 | -0.685027 | -0.936719 |
| 1 | -2.699416 | -1.325035 | 0.353143  |
| 1 | -3.473849 | -2.319400 | -0.707970 |
| 7 | 2.018106  | -0.167631 | 0.588896  |
| 1 | 2.995120  | -0.080695 | 0.303489  |
| 1 | 2.006481  | -0.636649 | 1.491241  |
| 1 | 1.648656  | 0.771325  | 0.748130  |
| 7 | -0.332509 | 0.217419  | -1.587544 |
| 1 | 0.478370  | -0.122264 | -1.065902 |
| 1 | -0.127957 | 0.099946  | -2.575585 |
| 1 | -1.113997 | -0.406852 | -1.371985 |
| 7 | 5.054209  | -0.023707 | -0.486379 |
| 1 | 4.985662  | -0.220359 | -1.479777 |
| 1 | 5.524951  | 0.869399  | -0.383226 |
| 1 | 5.653869  | -0.732563 | -0.076585 |
| 7 | -3.045033 | 1.492337  | -0.428721 |
| 1 | -2.294291 | 1.677764  | -1.089010 |
| 1 | -3.487626 | 2.371245  | -0.183404 |
| 1 | -2.607658 | 1.094538  | 0.405775  |

-----

Cartesian coordinates of : AM8\_14

-----

Atomic number (AN) and Cartesian coordinates

| AN | X         | Y         | Z         |
|----|-----------|-----------|-----------|
| 7  | 4.589426  | 0.001180  | 0.393227  |
| 1  | 4.805910  | -0.714555 | 1.079295  |
| 1  | 5.162782  | -0.174652 | -0.425318 |
| 1  | 4.876894  | 0.893112  | 0.782641  |
| 7  | -0.683567 | 1.744095  | 1.593598  |
| 1  | -0.560313 | 2.056721  | 2.551417  |
| 1  | -1.534183 | 1.180908  | 1.561948  |
| 1  | 0.086219  | 1.112489  | 1.365796  |
| 7  | -0.685960 | -1.742099 | 1.594586  |
| 1  | -0.562771 | -2.053555 | 2.552795  |
| 1  | -1.536209 | -1.178398 | 1.562369  |
| 1  | 0.084186  | -1.111263 | 1.365833  |
| 7  | -0.033115 | 2.820453  | -1.178957 |
| 1  | 0.809751  | 3.386801  | -1.155670 |
| 1  | -0.724847 | 3.349282  | -1.702039 |
| 1  | -0.370516 | 2.723154  | -0.214074 |
| 7  | -3.242564 | 0.002366  | 0.702077  |
| 1  | -3.848036 | 0.818162  | 0.719305  |
| 1  | -3.850377 | -0.811652 | 0.720749  |
| 1  | -2.748363 | 0.000865  | -0.200729 |
| 7  | -0.032480 | -2.823413 | -1.175309 |
| 1  | -0.723289 | -3.352974 | -1.698869 |
| 1  | 0.810219  | -3.389904 | -1.149358 |
| 1  | -0.371698 | -2.724443 | -0.211238 |
| 7  | 1.385600  | -0.000921 | -0.134870 |
| 1  | 1.138883  | -0.818475 | -0.693260 |
| 1  | 2.399495  | -0.000073 | -0.014963 |
| 1  | 1.137724  | 0.815532  | -0.694350 |
| 7  | -1.439455 | -0.001796 | -1.790487 |
| 1  | -0.846047 | 0.823962  | -1.694510 |
| 1  | -0.845901 | -0.827236 | -1.692753 |
| 1  | -1.794698 | -0.002868 | -2.742073 |

-----

Cartesian coordinates of : AM8\_15

-----  
Atomic number (AN) and Cartesian coordinates

| AN | X         | Y         | Z         |
|----|-----------|-----------|-----------|
| 7  | -4.141179 | -1.700758 | 0.300892  |
| 1  | -4.395261 | -0.739535 | 0.062251  |
| 1  | -4.553850 | -2.317621 | -0.391284 |
| 1  | -4.566635 | -1.926851 | 1.194106  |
| 7  | -0.121828 | 2.389553  | 0.378464  |
| 1  | -0.374191 | 2.782317  | 1.280649  |
| 1  | -0.367358 | 3.082429  | -0.322473 |
| 1  | -0.703822 | 1.561386  | 0.221965  |
| 7  | 4.358895  | -0.210604 | 0.315689  |
| 1  | 3.788527  | 0.231994  | -0.413964 |
| 1  | 5.043380  | 0.468316  | 0.633682  |
| 1  | 4.875468  | -0.976631 | -0.104523 |
| 7  | 1.556252  | -0.121575 | 1.657863  |
| 1  | 1.323065  | 0.815381  | 1.327557  |
| 1  | 1.422946  | -0.131445 | 2.664743  |
| 1  | 2.555885  | -0.253869 | 1.476647  |
| 7  | -3.813851 | 1.308039  | -0.422120 |
| 1  | -2.861397 | 0.955400  | -0.306413 |
| 1  | -3.945218 | 2.075797  | 0.228539  |
| 1  | -3.897790 | 1.689692  | -1.358756 |
| 7  | 1.360333  | -2.101059 | -0.807073 |
| 1  | 0.728242  | -2.893896 | -0.747350 |
| 1  | 2.285754  | -2.471040 | -1.003591 |
| 1  | 1.397281  | -1.662468 | 0.116812  |
| 7  | -1.235872 | -0.489481 | 0.045808  |
| 1  | -0.780322 | -0.795211 | -0.812387 |
| 1  | -2.038610 | -1.104566 | 0.205671  |
| 1  | -0.546181 | -0.655016 | 0.780029  |
| 7  | 2.089588  | 0.863599  | -1.463665 |
| 1  | 1.525082  | 1.453160  | -0.851723 |
| 1  | 2.095357  | 1.290400  | -2.384420 |
| 1  | 1.623290  | -0.042119 | -1.536766 |

-----  
Cartesian coordinates of : AM8\_16-----  
Atomic number (AN) and Cartesian coordinates

| AN | X         | Y         | Z         |
|----|-----------|-----------|-----------|
| 7  | -3.056623 | -0.458051 | 0.732617  |
| 1  | -2.798539 | -1.445051 | 0.796115  |
| 1  | -2.963720 | -0.195628 | -0.249879 |
| 1  | -4.037633 | -0.378873 | 0.981957  |
| 7  | -2.155103 | 1.124722  | -1.995400 |
| 1  | -3.056719 | 1.308405  | -2.425689 |
| 1  | -1.452923 | 1.307067  | -2.706518 |
| 1  | -2.020216 | 1.806418  | -1.240038 |
| 7  | -1.595085 | 2.398077  | 0.729846  |
| 1  | -2.025426 | 1.548098  | 1.099432  |
| 1  | -0.582743 | 2.293816  | 0.802256  |
| 1  | -1.873772 | 3.176923  | 1.317484  |
| 7  | -1.447593 | -3.163531 | 0.351266  |
| 1  | -0.695126 | -2.517694 | 0.112365  |
| 1  | -1.668427 | -3.708144 | -0.476091 |
| 1  | -1.095728 | -3.806441 | 1.053132  |
| 7  | 2.450108  | -2.239221 | -0.181740 |
| 1  | 1.556454  | -1.739081 | -0.127795 |
| 1  | 2.406023  | -2.878699 | -0.968887 |
| 1  | 2.542787  | -2.804479 | 0.656485  |
| 7  | 1.732850  | 2.291639  | 0.693257  |
| 1  | 2.541379  | 1.743224  | 0.375053  |
| 1  | 1.733943  | 3.160485  | 0.166143  |
| 1  | 1.903045  | 2.538388  | 1.664188  |
| 7  | 4.031276  | 0.445692  | -0.317811 |
| 1  | 3.622285  | -0.494593 | -0.289348 |
| 1  | 4.313467  | 0.622936  | -1.277262 |

|   |           |           |           |
|---|-----------|-----------|-----------|
| 1 | 4.881868  | 0.425606  | 0.236697  |
| 7 | -0.033895 | -0.380545 | 0.029517  |
| 1 | 0.588904  | 0.422573  | 0.142269  |
| 1 | -0.637887 | -0.161602 | -0.765055 |
| 1 | -0.662843 | -0.355135 | 0.832125  |

-----

Cartesian coordinates of : AM8\_17

-----

Atomic number (AN) and Cartesian coordinates

| AN | X         | Y         | Z         |
|----|-----------|-----------|-----------|
| 7  | -0.900429 | 2.364557  | 1.540587  |
| 1  | -0.829409 | 3.133805  | 2.198336  |
| 1  | -0.342837 | 1.590798  | 1.899001  |
| 1  | -0.483965 | 2.662956  | 0.657248  |
| 7  | -0.263177 | 2.440588  | -1.602267 |
| 1  | 0.417879  | 2.043873  | -2.243753 |
| 1  | -0.684987 | 3.238632  | -2.067410 |
| 1  | -0.994781 | 1.736786  | -1.462305 |
| 7  | -0.398276 | -1.258886 | -2.298627 |
| 1  | 0.277667  | -0.800571 | -1.673775 |
| 1  | 0.059839  | -1.476859 | -3.177171 |
| 1  | -1.134704 | -0.582308 | -2.481964 |
| 7  | 1.224169  | 0.128245  | -0.069439 |
| 1  | 1.060317  | 1.125364  | -0.194160 |
| 1  | 0.746299  | -0.149673 | 0.789486  |
| 1  | 2.225752  | -0.008017 | 0.070931  |
| 7  | -0.739684 | -0.748779 | 2.375237  |
| 1  | -1.592606 | -0.221638 | 2.545091  |
| 1  | -0.450903 | -1.148897 | 3.262706  |
| 1  | -0.979741 | -1.521681 | 1.745178  |
| 7  | -1.259191 | -2.905247 | 0.142774  |
| 1  | -0.602892 | -3.652109 | 0.352437  |
| 1  | -2.171926 | -3.339859 | 0.042554  |
| 1  | -0.996052 | -2.523260 | -0.774196 |
| 7  | -2.226092 | 0.368528  | -0.386956 |
| 1  | -3.166384 | -0.009864 | -0.449112 |
| 1  | -2.201909 | 1.044966  | 0.379236  |
| 1  | -1.612769 | -0.401885 | -0.122745 |
| 7  | 4.431127  | -0.327867 | 0.271229  |
| 1  | 4.966975  | 0.476006  | -0.039057 |
| 1  | 4.699283  | -0.522808 | 1.230201  |
| 1  | 4.712723  | -1.121727 | -0.294516 |

-----

Cartesian coordinates of : AM8\_18

-----

Atomic number (AN) and Cartesian coordinates

| AN | X         | Y         | Z         |
|----|-----------|-----------|-----------|
| 7  | 2.879033  | 2.034214  | 0.597814  |
| 1  | 3.571140  | 2.139214  | 1.333967  |
| 1  | 2.672424  | 2.968537  | 0.257252  |
| 1  | 3.316627  | 1.506640  | -0.164758 |
| 7  | 3.822285  | -0.220495 | -1.308362 |
| 1  | 3.472165  | -0.765319 | -0.512465 |
| 1  | 4.799044  | -0.459709 | -1.447877 |
| 1  | 3.323819  | -0.525198 | -2.138623 |
| 7  | 2.491931  | -1.123023 | 1.316817  |
| 1  | 1.584391  | -1.556083 | 1.131651  |
| 1  | 2.332814  | -0.131432 | 1.489503  |
| 1  | 2.862172  | -1.531684 | 2.169022  |
| 7  | 0.266850  | 0.561082  | -0.520865 |
| 1  | 0.682361  | 0.418027  | -1.438076 |
| 1  | 0.151108  | -0.367893 | -0.113427 |
| 1  | 0.978654  | 1.044333  | 0.030687  |
| 7  | -2.352093 | -1.168274 | -1.283106 |
| 1  | -1.849374 | -0.287257 | -1.374017 |
| 1  | -3.206503 | -0.955515 | -0.760362 |

|   |           |           |           |
|---|-----------|-----------|-----------|
| 1 | -2.625331 | -1.464637 | -2.214863 |
| 7 | -2.306467 | 2.272013  | 0.072207  |
| 1 | -2.504478 | 2.869122  | -0.725363 |
| 1 | -2.078904 | 2.887319  | 0.847691  |
| 1 | -1.458944 | 1.738608  | -0.150131 |
| 7 | -0.322879 | -2.522810 | 0.574299  |
| 1 | -0.770438 | -2.734839 | 1.461634  |
| 1 | -1.066212 | -2.227243 | -0.072900 |
| 1 | 0.053628  | -3.398190 | 0.221139  |
| 7 | -4.526078 | 0.117956  | 0.538370  |
| 1 | -4.578554 | -0.174616 | 1.508738  |
| 1 | -3.879414 | 0.911416  | 0.479090  |
| 1 | -5.450272 | 0.441764  | 0.272271  |

-----

Cartesian coordinates of : AM8\_19

-----

Atomic number (AN) and Cartesian coordinates

| AN | X         | Y         | Z         |
|----|-----------|-----------|-----------|
| 7  | 4.598860  | -0.971579 | -0.032672 |
| 1  | 4.386745  | -1.958614 | 0.071154  |
| 1  | 5.135529  | -0.860736 | -0.886584 |
| 1  | 5.197923  | -0.703506 | 0.741324  |
| 7  | -1.067242 | -0.704788 | 1.647780  |
| 1  | -0.957259 | -0.707957 | 2.657891  |
| 1  | -1.444576 | -1.616837 | 1.377120  |
| 1  | -0.131763 | -0.629074 | 1.242210  |
| 7  | -0.483955 | -1.097985 | -1.546221 |
| 1  | -1.180974 | -0.355042 | -1.549949 |
| 1  | 0.269240  | -0.779016 | -0.931284 |
| 1  | -0.106971 | -1.176807 | -2.485650 |
| 7  | -0.155196 | 2.368844  | 1.675884  |
| 1  | -0.631226 | 3.163300  | 2.089709  |
| 1  | -0.000772 | 2.564857  | 0.687487  |
| 1  | -0.774057 | 1.561517  | 1.724749  |
| 7  | -1.908012 | -3.299646 | 0.104385  |
| 1  | -1.431812 | -2.730146 | -0.602842 |
| 1  | -1.380480 | -4.157383 | 0.229938  |
| 1  | -2.821341 | -3.557633 | -0.254554 |
| 7  | -0.060886 | 2.324840  | -1.633315 |
| 1  | 0.322077  | 1.815657  | -2.425027 |
| 1  | -0.959387 | 1.892340  | -1.399512 |
| 1  | -0.243755 | 3.271364  | -1.953297 |
| 7  | 1.677452  | 0.383902  | 0.310332  |
| 1  | 1.468613  | 1.128368  | -0.355608 |
| 1  | 2.624864  | 0.045811  | 0.138018  |
| 1  | 1.664978  | 0.844207  | 1.219374  |
| 7  | -2.646913 | 1.010844  | -0.386537 |
| 1  | -2.233882 | 0.456609  | 0.374852  |
| 1  | -2.981709 | 1.877435  | 0.026762  |
| 1  | -3.468768 | 0.510269  | -0.713733 |

-----

Cartesian coordinates of : AM8\_20

-----

Atomic number (AN) and Cartesian coordinates

| AN | X         | Y         | Z         |
|----|-----------|-----------|-----------|
| 7  | -0.365780 | -0.603967 | 0.484973  |
| 1  | -0.266741 | -0.594744 | 1.497277  |
| 1  | 0.436441  | -1.128757 | 0.124575  |
| 1  | -1.211634 | -1.146740 | 0.275325  |
| 7  | -3.065020 | -2.089117 | -0.162117 |
| 1  | -3.776735 | -1.351972 | -0.127963 |
| 1  | -3.342069 | -2.815393 | 0.491239  |
| 1  | -3.098613 | -2.501856 | -1.089333 |
| 7  | -4.922013 | 0.413651  | -0.037986 |
| 1  | -4.109826 | 1.039001  | -0.042108 |
| 1  | -5.449577 | 0.592637  | 0.810588  |

|   |           |           |           |
|---|-----------|-----------|-----------|
| 1 | -5.519405 | 0.669597  | -0.817665 |
| 7 | 1.377583  | 1.830684  | -0.552029 |
| 1 | 1.387886  | 1.873349  | -1.567604 |
| 1 | 0.995132  | 2.713775  | -0.226488 |
| 1 | 0.712896  | 1.096282  | -0.290640 |
| 7 | 4.259788  | 0.423007  | -0.691419 |
| 1 | 5.068718  | 0.801389  | -1.172161 |
| 1 | 4.511900  | 0.238270  | 0.277761  |
| 1 | 3.533147  | 1.138705  | -0.656028 |
| 7 | 2.278480  | -1.926866 | -0.785784 |
| 1 | 2.752607  | -2.767407 | -0.467120 |
| 1 | 1.863897  | -2.155543 | -1.684954 |
| 1 | 3.002202  | -1.216961 | -0.950549 |
| 7 | -2.205990 | 1.952634  | -0.055228 |
| 1 | -2.008406 | 2.606977  | 0.695957  |
| 1 | -1.570718 | 1.157617  | 0.054710  |
| 1 | -1.960625 | 2.417014  | -0.924456 |
| 7 | 2.765936  | -0.064587 | 1.841269  |
| 1 | 2.407989  | -0.869155 | 1.330048  |
| 1 | 2.403396  | -0.100421 | 2.788102  |
| 1 | 2.377260  | 0.756271  | 1.379730  |

-----

Cartesian coordinates of : AM8\_21

-----

Atomic number (AN) and Cartesian coordinates

| AN | X         | Y         | Z         |
|----|-----------|-----------|-----------|
| 7  | -0.844304 | 2.308780  | -0.915470 |
| 1  | -1.199656 | 3.124902  | -1.402112 |
| 1  | -1.640603 | 1.757844  | -0.582687 |
| 1  | -0.327116 | 1.742035  | -1.585602 |
| 7  | -2.620815 | 0.321583  | 0.675067  |
| 1  | -3.515601 | -0.164895 | 0.617182  |
| 1  | -2.549416 | 0.730726  | 1.601774  |
| 1  | -1.869507 | -0.363286 | 0.588303  |
| 7  | -0.195331 | -1.461387 | -0.446723 |
| 1  | -0.178825 | -0.795039 | -1.218192 |
| 1  | 0.751850  | -1.845909 | -0.403545 |
| 1  | -0.820301 | -2.218370 | -0.708546 |
| 7  | 1.730358  | 0.564209  | -1.676754 |
| 1  | 2.158396  | -0.341919 | -1.490256 |
| 1  | 2.342186  | 1.073930  | -2.306451 |
| 1  | 1.716291  | 1.060021  | -0.786371 |
| 7  | 0.776691  | 1.008783  | 1.361631  |
| 1  | 0.380215  | 0.108972  | 1.082447  |
| 1  | 0.567926  | 1.142967  | 2.346654  |
| 1  | 0.259498  | 1.719776  | 0.835391  |
| 7  | 2.927305  | -2.199558 | -0.194124 |
| 1  | 3.366195  | -1.394596 | 0.269111  |
| 1  | 2.817998  | -2.927186 | 0.506908  |
| 1  | 3.585622  | -2.557882 | -0.879951 |
| 7  | 3.830737  | 0.469211  | 1.052762  |
| 1  | 2.860949  | 0.761111  | 1.223629  |
| 1  | 4.347913  | 0.573859  | 1.920250  |
| 1  | 4.233940  | 1.122851  | 0.387991  |
| 7  | -5.551255 | -0.919344 | 0.139776  |
| 1  | -6.206158 | -0.189026 | 0.399822  |
| 1  | -5.919426 | -1.799431 | 0.484987  |
| 1  | -5.536075 | -0.967388 | -0.873890 |

-----

Cartesian coordinates of : AM8\_22

-----

Atomic number (AN) and Cartesian coordinates

| AN | X        | Y         | Z        |
|----|----------|-----------|----------|
| 7  | 2.049612 | -0.288495 | 0.069913 |
| 1  | 2.740271 | -1.029147 | 0.190756 |
| 1  | 1.432867 | -0.295018 | 0.879769 |



|   |           |           |           |
|---|-----------|-----------|-----------|
| 1 | 2.530909  | 0.611129  | 0.072752  |
| 7 | -0.284484 | 2.129702  | 1.396012  |
| 1 | -1.178820 | 2.597465  | 1.515529  |
| 1 | 0.284953  | 2.391193  | 2.196751  |
| 1 | -0.463643 | 1.120470  | 1.472605  |
| 7 | -0.932242 | -0.882415 | 1.183555  |
| 1 | -0.809692 | -0.907451 | 0.172419  |
| 1 | -0.515945 | -1.729827 | 1.558181  |
| 1 | -1.939576 | -0.927781 | 1.362575  |
| 7 | -0.333679 | 0.700520  | -1.585015 |
| 1 | -0.177224 | 1.140394  | -2.487434 |
| 1 | 0.537038  | 0.231627  | -1.308423 |
| 1 | -0.463891 | 1.445264  | -0.900674 |
| 7 | -4.062820 | -0.821911 | 1.091751  |
| 1 | -4.696626 | -1.581354 | 1.318344  |
| 1 | -4.540672 | 0.044536  | 1.317112  |
| 1 | -3.889465 | -0.839361 | 0.081301  |
| 7 | -2.993822 | -0.949328 | -1.824728 |
| 1 | -3.520823 | -0.617279 | -2.626858 |
| 1 | -2.728913 | -1.909267 | -2.026197 |
| 1 | -2.126934 | -0.401651 | -1.775764 |
| 7 | 4.299476  | -2.630053 | 0.163065  |
| 1 | 4.368291  | -3.288776 | 0.931596  |
| 1 | 4.121458  | -3.160959 | -0.683188 |
| 1 | 5.204692  | -2.182986 | 0.060757  |
| 7 | 2.237721  | 2.779100  | -0.436018 |
| 1 | 1.332072  | 2.682048  | 0.029004  |
| 1 | 2.546194  | 3.740432  | -0.334256 |
| 1 | 2.095141  | 2.606459  | -1.426399 |

-----

Cartesian coordinates of : AM8\_23

-----

Atomic number (AN) and Cartesian coordinates

| AN | X         | Y         | Z         |
|----|-----------|-----------|-----------|
| 7  | 0.437707  | -1.664689 | 0.317387  |
| 1  | 0.793378  | -2.592216 | 0.106625  |
| 1  | 0.476581  | -1.554446 | 1.326360  |
| 1  | 1.086799  | -0.984854 | -0.086344 |
| 7  | 2.306056  | 0.649463  | -0.844171 |
| 1  | 3.158071  | 1.114483  | -0.519764 |
| 1  | 1.496276  | 1.163653  | -0.484793 |
| 1  | 2.286199  | 0.738123  | -1.856211 |
| 7  | 5.206935  | 1.229822  | 0.292469  |
| 1  | 5.177688  | 0.213592  | 0.402166  |
| 1  | 5.358163  | 1.641842  | 1.207471  |
| 1  | 6.013081  | 1.463850  | -0.277725 |
| 7  | -2.306056 | -0.649461 | -0.844173 |
| 1  | -2.286195 | -0.738123 | -1.856213 |
| 1  | -3.158070 | -1.114482 | -0.519768 |
| 1  | -1.496276 | -1.163647 | -0.484792 |
| 7  | -4.149689 | 1.696411  | 0.209029  |
| 1  | -3.785590 | 2.188513  | 1.018710  |
| 1  | -4.414275 | 2.397626  | -0.475383 |
| 1  | -3.389749 | 1.135452  | -0.184092 |
| 7  | 4.149687  | -1.696413 | 0.209028  |
| 1  | 3.785589  | -2.188516 | 1.018709  |
| 1  | 3.389747  | -1.135452 | -0.184091 |
| 1  | 4.414270  | -2.397627 | -0.475385 |
| 7  | -5.206933 | -1.229825 | 0.292469  |
| 1  | -6.013080 | -1.463854 | -0.277723 |
| 1  | -5.358158 | -1.641846 | 1.207471  |
| 1  | -5.177687 | -0.213595 | 0.402167  |
| 7  | -0.437707 | 1.664692  | 0.317386  |
| 1  | -0.793380 | 2.592221  | 0.106632  |
| 1  | -1.086799 | 0.984859  | -0.086348 |
| 1  | -0.476579 | 1.554442  | 1.326358  |

-----

Cartesian coordinates of : AM8\_24

-----  
Atomic number (AN) and Cartesian coordinates

| AN | X         | Y         | Z         |
|----|-----------|-----------|-----------|
| 7  | -2.992572 | -0.243789 | 0.837232  |
| 1  | -2.874095 | -0.686295 | 1.743132  |
| 1  | -2.300013 | -0.649369 | 0.202762  |
| 1  | -3.926092 | -0.479141 | 0.500353  |
| 7  | -0.473199 | -0.605356 | -0.989713 |
| 1  | -0.379753 | -0.856899 | -1.968974 |
| 1  | 0.298668  | -1.042784 | -0.480301 |
| 1  | -0.343590 | 0.402473  | -0.920344 |
| 7  | -1.415342 | 2.337573  | 0.287137  |
| 1  | -2.058083 | 1.582605  | 0.559167  |
| 1  | -1.561889 | 3.111057  | 0.929298  |
| 1  | -1.707389 | 2.666202  | -0.628959 |
| 7  | -5.973144 | -0.776133 | -0.338640 |
| 1  | -5.905234 | -1.161447 | -1.274866 |
| 1  | -6.626851 | -1.350603 | 0.182846  |
| 1  | -6.373582 | 0.152999  | -0.416206 |
| 7  | 4.539153  | -0.384328 | 0.674320  |
| 1  | 4.502634  | 0.480558  | 1.205357  |
| 1  | 5.495555  | -0.721465 | 0.713968  |
| 1  | 4.316577  | -0.142888 | -0.296385 |
| 7  | 1.552923  | 1.310299  | 0.744175  |
| 1  | 0.605768  | 1.689751  | 0.656533  |
| 1  | 1.476951  | 0.317426  | 0.960943  |
| 1  | 1.992937  | 1.764730  | 1.538291  |
| 7  | 2.979566  | 0.395480  | -1.830252 |
| 1  | 2.384077  | -0.392232 | -2.069452 |
| 1  | 2.481903  | 0.926026  | -1.106802 |
| 1  | 3.063509  | 0.975581  | -2.658690 |
| 7  | 1.916836  | -2.008035 | 0.650797  |
| 1  | 2.840062  | -1.580371 | 0.788855  |
| 1  | 2.051989  | -2.814199 | 0.046720  |
| 1  | 1.606393  | -2.371693 | 1.547359  |

-----  
Cartesian coordinates of : AM8\_25-----  
Atomic number (AN) and Cartesian coordinates

| AN | X         | Y         | Z         |
|----|-----------|-----------|-----------|
| 7  | 2.624617  | 2.952683  | 0.151138  |
| 1  | 3.412956  | 2.311934  | 0.026063  |
| 1  | 2.633644  | 3.614166  | -0.618533 |
| 1  | 2.783139  | 3.482600  | 1.002008  |
| 7  | 4.341166  | 0.368456  | -0.235623 |
| 1  | 4.866299  | -0.075462 | 0.510837  |
| 1  | 3.381126  | 0.010311  | -0.207322 |
| 1  | 4.762437  | 0.077938  | -1.112028 |
| 7  | -0.905209 | -1.312637 | 2.218687  |
| 1  | -1.572445 | -2.007497 | 2.541599  |
| 1  | -0.607580 | -0.794911 | 3.040670  |
| 1  | -1.411565 | -0.658556 | 1.606241  |
| 7  | -2.014213 | 0.638399  | 0.125961  |
| 1  | -1.440898 | 1.475769  | 0.180849  |
| 1  | -1.695032 | 0.116420  | -0.692859 |
| 1  | -2.977730 | 0.934968  | -0.031512 |
| 7  | 0.796741  | -2.895037 | 0.051926  |
| 1  | 0.317925  | -2.517171 | 0.874037  |
| 1  | 1.077508  | -3.848935 | 0.253173  |
| 1  | 1.637258  | -2.334603 | -0.069307 |
| 7  | -0.855081 | -1.417132 | -2.081604 |
| 1  | -0.292340 | -1.342514 | -2.924185 |
| 1  | -0.388480 | -2.088719 | -1.460155 |
| 1  | -1.743797 | -1.822163 | -2.361074 |
| 7  | 1.262342  | 0.097875  | -0.025007 |
| 1  | 0.615818  | -0.068302 | -0.795088 |
| 1  | 1.389825  | 1.108248  | 0.068558  |

|   |           |           |           |
|---|-----------|-----------|-----------|
| 1 | 0.778400  | -0.234728 | 0.807744  |
| 7 | -5.120347 | 1.537631  | -0.205924 |
| 1 | -5.303551 | 2.400075  | 0.296381  |
| 1 | -5.452413 | 1.660650  | -1.156790 |
| 1 | -5.680611 | 0.808813  | 0.223812  |

-----

Cartesian coordinates of : AM8\_26

-----

Atomic number (AN) and Cartesian coordinates

| AN | X         | Y         | Z         |
|----|-----------|-----------|-----------|
| 7  | -4.515564 | 1.176821  | -0.512081 |
| 1  | -5.053274 | 1.141266  | 0.348834  |
| 1  | -4.361969 | 0.207896  | -0.813392 |
| 1  | -5.102781 | 1.627734  | -1.206900 |
| 7  | -3.680935 | -1.741941 | -1.139043 |
| 1  | -3.208421 | -1.937346 | -2.016076 |
| 1  | -4.248326 | -2.554719 | -0.920392 |
| 1  | -2.963177 | -1.647000 | -0.409359 |
| 7  | -1.660777 | -0.982785 | 1.054615  |
| 1  | -1.621105 | 0.020275  | 0.868274  |
| 1  | -1.998590 | -1.091239 | 2.006547  |
| 1  | -0.700646 | -1.333206 | 1.038632  |
| 7  | -1.598850 | 2.112995  | -0.003966 |
| 1  | -1.558376 | 3.085301  | 0.288372  |
| 1  | -2.584166 | 1.892588  | -0.194700 |
| 1  | -1.102385 | 2.055360  | -0.889164 |
| 7  | 1.363251  | -2.092851 | 0.770772  |
| 1  | 2.002527  | -2.434416 | 1.482730  |
| 1  | 1.036923  | -2.909014 | 0.260750  |
| 1  | 1.912726  | -1.519282 | 0.117760  |
| 7  | 2.825091  | 0.067190  | -0.870400 |
| 1  | 2.460533  | 0.321356  | -1.783115 |
| 1  | 3.835900  | 0.202848  | -0.896445 |
| 1  | 2.424847  | 0.713061  | -0.185758 |
| 7  | 1.086524  | 1.110264  | 1.508057  |
| 1  | 1.011458  | 0.102050  | 1.638423  |
| 1  | 0.170893  | 1.432500  | 1.191277  |
| 1  | 1.260530  | 1.527201  | 2.417039  |
| 7  | 6.056117  | 0.354170  | -0.814003 |
| 1  | 6.514118  | 0.921857  | -1.519212 |
| 1  | 6.308397  | 0.730824  | 0.093869  |
| 1  | 6.440363  | -0.582936 | -0.875648 |

-----

Cartesian coordinates of : AM8\_27

-----

Atomic number (AN) and Cartesian coordinates

| AN | X         | Y         | Z         |
|----|-----------|-----------|-----------|
| 7  | 1.261650  | 2.412168  | -0.755983 |
| 1  | 1.834072  | 3.250122  | -0.791710 |
| 1  | 1.129254  | 2.105062  | -1.715056 |
| 1  | 1.807980  | 1.683787  | -0.276632 |
| 7  | -1.261723 | -2.411758 | 0.756619  |
| 1  | -1.808032 | -1.683524 | 0.277018  |
| 1  | -1.129273 | -2.104300 | 1.715571  |
| 1  | -1.834180 | -3.249673 | 0.792678  |
| 7  | -2.793670 | -0.137759 | -0.675520 |
| 1  | -2.540838 | -0.096975 | -1.658301 |
| 1  | -2.439775 | 0.719226  | -0.240265 |
| 1  | -3.812216 | -0.117225 | -0.623238 |
| 7  | -1.489078 | 2.409259  | 0.719344  |
| 1  | -1.908518 | 3.333080  | 0.680956  |
| 1  | -0.583541 | 2.461503  | 0.238543  |
| 1  | -1.297952 | 2.212544  | 1.697149  |
| 7  | 1.488909  | -2.409281 | -0.718889 |
| 1  | 1.908299  | -3.333121 | -0.680397 |
| 1  | 1.297695  | -2.212711 | -1.696705 |

|   |           |           |           |
|---|-----------|-----------|-----------|
| 1 | 0.583416  | -2.461400 | -0.237992 |
| 7 | 2.793858  | 0.137877  | 0.675431  |
| 1 | 2.541495  | 0.097059  | 1.658331  |
| 1 | 3.812380  | 0.117377  | 0.622673  |
| 1 | 2.439799  | -0.719117 | 0.240328  |
| 7 | 5.984126  | 0.030493  | 0.063981  |
| 1 | 6.125371  | 0.796344  | -0.586377 |
| 1 | 6.061215  | -0.836267 | -0.458009 |
| 1 | 6.741461  | 0.053467  | 0.738426  |
| 7 | -5.984094 | -0.030960 | -0.064983 |
| 1 | -6.124886 | -0.796962 | 0.585294  |
| 1 | -6.741448 | -0.054271 | -0.739394 |
| 1 | -6.061634 | 0.835698  | 0.457110  |

-----

Cartesian coordinates of ammonia nanomer: (NH<sub>3</sub>)<sub>9</sub>

Cartesian coordinates of : AM9\_1

-----

Atomic number (AN) and Cartesian coordinates

| AN | X         | Y         | Z         |
|----|-----------|-----------|-----------|
| 7  | -3.145520 | 0.940525  | -0.726905 |
| 1  | -4.016899 | 1.235678  | -0.294523 |
| 1  | -3.282025 | 1.035290  | -1.730301 |
| 1  | -2.427228 | 1.627576  | -0.458710 |
| 7  | 2.892620  | -1.309894 | -1.115717 |
| 1  | 2.124181  | -0.884845 | -1.637171 |
| 1  | 3.656385  | -1.506120 | -1.753786 |
| 1  | 3.206490  | -0.605293 | -0.452469 |
| 7  | 0.148215  | 0.022869  | -1.247505 |
| 1  | 0.501212  | 0.104893  | -0.292760 |
| 1  | -0.542952 | -0.726445 | -1.222861 |
| 1  | -0.365109 | 0.885833  | -1.414581 |
| 7  | -2.342546 | -2.132498 | -0.669935 |
| 1  | -2.692106 | -2.610585 | -1.495186 |
| 1  | -2.718625 | -1.179063 | -0.676889 |
| 1  | -2.741404 | -2.605097 | 0.136671  |
| 7  | -1.178680 | -0.146588 | 1.820986  |
| 1  | -1.837798 | -0.023531 | 1.052232  |
| 1  | -1.718983 | -0.339545 | 2.659203  |
| 1  | -0.629958 | -0.982798 | 1.605049  |
| 7  | -0.852422 | 2.681956  | 0.388809  |
| 1  | -0.735747 | 1.986485  | 1.127775  |
| 1  | -1.097022 | 3.563282  | 0.830428  |
| 1  | 0.065330  | 2.804493  | -0.049841 |
| 7  | 2.041257  | 2.309422  | -0.757827 |
| 1  | 1.962054  | 1.752587  | -1.604742 |
| 1  | 2.218265  | 1.656702  | 0.009861  |
| 1  | 2.847207  | 2.917928  | -0.855965 |
| 7  | 0.615821  | -2.546352 | 0.599659  |
| 1  | 0.706230  | -3.449088 | 1.056203  |
| 1  | 1.425260  | -2.432210 | -0.017977 |
| 1  | -0.220437 | -2.583748 | 0.013358  |
| 7  | 1.936363  | 0.215455  | 1.645558  |
| 1  | 1.104774  | 0.615955  | 2.078141  |
| 1  | 2.691833  | 0.269381  | 2.322478  |
| 1  | 1.711316  | -0.771977 | 1.506503  |

-----

Cartesian coordinates of : AM9\_2

-----

Atomic number (AN) and Cartesian coordinates

| AN | X         | Y         | Z         |
|----|-----------|-----------|-----------|
| 7  | -0.098187 | 0.004583  | -1.315994 |
| 1  | 0.485745  | -0.829445 | -1.367739 |
| 1  | -0.478752 | 0.012078  | -0.369434 |
| 1  | 0.533080  | 0.804143  | -1.363484 |

|   |           |           |           |
|---|-----------|-----------|-----------|
| 7 | -1.846393 | -0.002459 | 1.619954  |
| 1 | -2.426557 | -0.004003 | 2.453633  |
| 1 | -1.245293 | 0.822864  | 1.667315  |
| 1 | -1.240763 | -0.824592 | 1.667197  |
| 7 | -0.049595 | -2.581232 | 0.758108  |
| 1 | -0.898670 | -2.611815 | 0.183468  |
| 1 | 0.744136  | -2.648382 | 0.117852  |
| 1 | -0.043967 | -3.420292 | 1.331107  |
| 7 | -2.534520 | -1.832795 | -0.921481 |
| 1 | -3.396205 | -2.188216 | -1.321445 |
| 1 | -2.041353 | -1.302035 | -1.637209 |
| 1 | -2.766438 | -1.169879 | -0.182362 |
| 7 | 1.685719  | -0.002395 | 1.571272  |
| 1 | 1.075544  | 0.817561  | 1.506549  |
| 1 | 1.077594  | -0.823579 | 1.501249  |
| 1 | 2.084887  | -0.005338 | 2.505813  |
| 7 | 2.657689  | 1.840582  | -0.804326 |
| 1 | 3.324289  | 2.557260  | -0.532811 |
| 1 | 3.015087  | 1.418152  | -1.655873 |
| 1 | 2.646277  | 1.128685  | -0.070490 |
| 7 | -2.540701 | 1.842887  | -0.915818 |
| 1 | -2.029920 | 1.318882  | -1.624417 |
| 1 | -3.397595 | 2.193807  | -1.329720 |
| 1 | -2.781003 | 1.175353  | -0.183775 |
| 7 | -0.049567 | 2.574869  | 0.750486  |
| 1 | -0.906574 | 2.612960  | 0.188054  |
| 1 | -0.024366 | 3.417249  | 1.318065  |
| 1 | 0.734348  | 2.628330  | 0.097295  |
| 7 | 2.640091  | -1.847703 | -0.817695 |
| 1 | 3.370181  | -2.510417 | -0.574451 |
| 1 | 2.621751  | -1.122135 | -0.097694 |
| 1 | 2.912781  | -1.421547 | -1.698230 |

-----

Cartesian coordinates of : AM9\_3

-----

Atomic number (AN) and Cartesian coordinates

| AN | X         | Y         | Z         |
|----|-----------|-----------|-----------|
| 7  | -2.974654 | -0.900144 | -1.300204 |
| 1  | -3.706876 | -1.592561 | -1.415959 |
| 1  | -2.805034 | -0.767671 | -0.300614 |
| 1  | -2.116630 | -1.269183 | -1.699822 |
| 7  | -1.876603 | -0.185191 | 1.671412  |
| 1  | -1.465635 | -1.116341 | 1.587062  |
| 1  | -2.256915 | -0.105681 | 2.610032  |
| 1  | -1.104353 | 0.481545  | 1.599896  |
| 7  | 0.308646  | 2.166398  | 0.990576  |
| 1  | -0.469950 | 2.352977  | 0.354570  |
| 1  | 0.342557  | 2.927024  | 1.662949  |
| 1  | 1.171339  | 2.201754  | 0.438416  |
| 7  | -2.495522 | 2.000350  | -0.574031 |
| 1  | -2.755636 | 1.560321  | 0.308216  |
| 1  | -2.893931 | 1.392417  | -1.290078 |
| 1  | -2.955145 | 2.903601  | -0.632553 |
| 7  | 2.949534  | 1.722777  | -0.701315 |
| 1  | 3.032850  | 2.281374  | -1.545591 |
| 1  | 3.740609  | 1.962668  | -0.110753 |
| 1  | 3.060559  | 0.738818  | -0.966585 |
| 7  | 2.819436  | -1.366271 | -1.009483 |
| 1  | 2.048436  | -1.754897 | -1.545139 |
| 1  | 2.510174  | -1.294675 | -0.032778 |
| 1  | 3.592761  | -2.021340 | -1.060268 |
| 7  | -0.424945 | -2.653160 | 0.379095  |
| 1  | -0.258698 | -1.881559 | -0.277804 |
| 1  | -1.210654 | -3.195920 | 0.032489  |
| 1  | 0.391290  | -3.258273 | 0.361968  |
| 7  | 1.595768  | -0.715284 | 1.753990  |
| 1  | 0.824780  | -1.373896 | 1.852267  |
| 1  | 1.181305  | 0.213577  | 1.647360  |
| 1  | 2.115128  | -0.716191 | 2.626515  |

|   |           |           |           |
|---|-----------|-----------|-----------|
| 7 | 0.039070  | -0.027395 | -1.242693 |
| 1 | 0.270714  | 0.110123  | -2.223805 |
| 1 | 0.849898  | 0.300380  | -0.718013 |
| 1 | -0.718047 | 0.627041  | -1.033405 |

-----

Cartesian coordinates of : AM9\_4

-----

Atomic number (AN) and Cartesian coordinates

| AN | X         | Y         | Z         |
|----|-----------|-----------|-----------|
| 7  | 3.259040  | -0.011895 | -0.006340 |
| 1  | 3.611068  | -0.910226 | 0.313321  |
| 1  | 4.060663  | 0.607902  | -0.079841 |
| 1  | 2.649220  | 0.355624  | 0.729391  |
| 7  | -1.681639 | 0.212419  | -1.874446 |
| 1  | -2.179905 | 0.184359  | -2.759166 |
| 1  | -1.951810 | -0.620786 | -1.347058 |
| 1  | -2.015828 | 1.032471  | -1.359890 |
| 7  | 1.001491  | -1.521412 | -1.659497 |
| 1  | 0.268600  | -0.846073 | -1.890704 |
| 1  | 1.248313  | -2.007477 | -2.516711 |
| 1  | 1.823773  | -0.989930 | -1.366457 |
| 7  | -1.703384 | -2.588196 | -0.332933 |
| 1  | -1.482933 | -2.716065 | 0.652051  |
| 1  | -0.803496 | -2.588207 | -0.815710 |
| 1  | -2.231848 | -3.398183 | -0.641446 |
| 7  | 0.997369  | 1.944697  | -1.338462 |
| 1  | 1.140711  | 2.648392  | -2.056710 |
| 1  | 0.206490  | 1.366761  | -1.634933 |
| 1  | 1.819157  | 1.341199  | -1.335000 |
| 7  | 1.010554  | 1.371821  | 1.727205  |
| 1  | 0.997944  | 1.857055  | 0.825968  |
| 1  | 1.241940  | 2.054670  | 2.442715  |
| 1  | 0.048352  | 1.072154  | 1.895036  |
| 7  | -1.871770 | -0.137452 | 1.813038  |
| 1  | -1.144181 | -0.838569 | 1.975679  |
| 1  | -2.522422 | -0.174779 | 2.592258  |
| 1  | -2.372143 | -0.464441 | 0.988062  |
| 7  | 0.750887  | -1.817986 | 1.562680  |
| 1  | 1.168244  | -0.930181 | 1.842219  |
| 1  | 1.283082  | -2.568389 | 1.991811  |
| 1  | 0.865913  | -1.891134 | 0.549239  |
| 7  | -1.856100 | 2.584499  | 0.088565  |
| 1  | -1.833296 | 1.911588  | 0.856140  |
| 1  | -2.348264 | 3.413271  | 0.404766  |
| 1  | -0.892478 | 2.843530  | -0.113701 |

-----

Cartesian coordinates of : AM9\_5

-----

Atomic number (AN) and Cartesian coordinates

| AN | X         | Y         | Z         |
|----|-----------|-----------|-----------|
| 7  | 0.396000  | 3.249617  | -0.151880 |
| 1  | 0.552681  | 3.730622  | -1.033248 |
| 1  | 0.390858  | 3.964738  | 0.569927  |
| 1  | -0.546833 | 2.847103  | -0.191536 |
| 7  | -0.660161 | -0.062130 | 1.517360  |
| 1  | -0.986758 | 0.798954  | 1.077017  |
| 1  | -1.139457 | -0.127153 | 2.411367  |
| 1  | -1.018986 | -0.817694 | 0.931606  |
| 7  | 0.539867  | 0.191200  | -1.438924 |
| 1  | 0.849089  | 1.036382  | -0.956959 |
| 1  | 0.850583  | -0.592705 | -0.863928 |
| 1  | 1.067916  | 0.134877  | -2.305632 |
| 7  | -2.187496 | 1.630275  | -0.755414 |
| 1  | -2.888842 | 1.038270  | -0.300975 |
| 1  | -2.672716 | 2.186732  | -1.453435 |
| 1  | -1.538811 | 1.011779  | -1.247642 |

|   |           |           |           |
|---|-----------|-----------|-----------|
| 7 | 2.279058  | 1.078507  | 1.275882  |
| 1 | 1.433980  | 0.585952  | 1.575105  |
| 1 | 2.798883  | 1.338784  | 2.108618  |
| 1 | 1.942630  | 1.936922  | 0.836803  |
| 7 | 1.305782  | -2.443947 | 0.491991  |
| 1 | 2.203122  | -2.182939 | 0.071796  |
| 1 | 1.118179  | -1.765714 | 1.229187  |
| 1 | 1.423003  | -3.350609 | 0.934343  |
| 7 | 3.723877  | -0.876579 | -0.637772 |
| 1 | 3.345133  | -0.125807 | -0.046979 |
| 1 | 4.683870  | -1.044614 | -0.352964 |
| 1 | 3.753809  | -0.539165 | -1.594784 |
| 7 | -3.886347 | -0.660589 | 0.572295  |
| 1 | -4.789645 | -0.985807 | 0.242437  |
| 1 | -3.896117 | -0.728108 | 1.585068  |
| 1 | -3.169187 | -1.300371 | 0.218612  |
| 7 | -1.503074 | -2.147334 | -0.871072 |
| 1 | -0.589782 | -2.475823 | -0.540210 |
| 1 | -1.298774 | -1.387469 | -1.518625 |
| 1 | -1.930370 | -2.900285 | -1.402233 |

-----

Cartesian coordinates of : AM9\_6

-----

Atomic number (AN) and Cartesian coordinates

| AN | X         | Y         | Z         |
|----|-----------|-----------|-----------|
| 7  | -1.035612 | -2.151585 | -1.470471 |
| 1  | -1.670437 | -1.359372 | -1.558995 |
| 1  | -1.546905 | -2.999918 | -1.688514 |
| 1  | -0.731947 | -2.191530 | -0.496129 |
| 7  | 2.194647  | 0.728057  | 1.235244  |
| 1  | 2.745523  | 0.979593  | 2.050876  |
| 1  | 2.672473  | -0.050963 | 0.774794  |
| 1  | 2.194691  | 1.537283  | 0.606861  |
| 7  | 1.157544  | 2.964695  | -0.673042 |
| 1  | 0.992962  | 2.318504  | -1.444206 |
| 1  | 1.326936  | 3.887711  | -1.058518 |
| 1  | 0.291924  | 2.996012  | -0.136557 |
| 7  | -0.031112 | -1.567803 | 1.539832  |
| 1  | 0.125211  | -2.183542 | 2.333096  |
| 1  | 0.606783  | -0.774756 | 1.643177  |
| 1  | -0.985935 | -1.211850 | 1.619994  |
| 7  | -0.884270 | 1.760007  | 1.491651  |
| 1  | -1.525814 | 0.993723  | 1.695452  |
| 1  | 0.063425  | 1.377450  | 1.532660  |
| 1  | -0.967350 | 2.432663  | 2.248409  |
| 7  | 2.648937  | -2.143008 | -0.052666 |
| 1  | 2.713355  | -2.309765 | -1.052437 |
| 1  | 3.145322  | -2.901025 | 0.406308  |
| 1  | 1.662143  | -2.222165 | 0.199401  |
| 7  | 0.979372  | 0.073678  | -1.738841 |
| 1  | 1.976347  | 0.096574  | -1.938054 |
| 1  | 0.607144  | -0.812967 | -2.083713 |
| 1  | 0.899744  | 0.017723  | -0.722190 |
| 7  | -3.012332 | -0.667197 | 0.974436  |
| 1  | -3.232908 | -1.641512 | 0.786092  |
| 1  | -2.813069 | -0.220987 | 0.073325  |
| 1  | -3.856458 | -0.243231 | 1.348648  |
| 7  | -1.933048 | 1.053816  | -1.399544 |
| 1  | -2.540848 | 1.608803  | -1.994334 |
| 1  | -1.058654 | 0.900500  | -1.904488 |
| 1  | -1.682542 | 1.622427  | -0.587151 |

-----

Cartesian coordinates of : AM9\_7

-----

Atomic number (AN) and Cartesian coordinates

| AN | X | Y | Z |
|----|---|---|---|
|----|---|---|---|

-----

|   |           |           |           |
|---|-----------|-----------|-----------|
| 7 | 3.000502  | -1.694948 | -0.017674 |
| 1 | 2.666706  | -0.949318 | -0.637315 |
| 1 | 3.930154  | -1.437003 | 0.299829  |
| 1 | 3.102890  | -2.539138 | -0.573217 |
| 7 | -0.762187 | -1.576243 | -1.888343 |
| 1 | -0.469999 | -2.315616 | -2.520690 |
| 1 | -1.778662 | -1.544351 | -1.913023 |
| 1 | -0.505817 | -1.859346 | -0.935924 |
| 7 | 1.601531  | 0.559689  | -1.724888 |
| 1 | 1.271256  | 1.495525  | -1.470286 |
| 1 | 0.779182  | -0.027106 | -1.889759 |
| 1 | 2.092719  | 0.645413  | -2.610121 |
| 7 | -2.111493 | 1.215573  | -1.128218 |
| 1 | -2.654424 | 0.451104  | -0.716703 |
| 1 | -1.418271 | 0.759159  | -1.720095 |
| 1 | -2.730186 | 1.742264  | -1.737941 |
| 7 | 0.062134  | -2.027412 | 1.088271  |
| 1 | 1.068959  | -1.952768 | 0.924086  |
| 1 | -0.261732 | -1.144329 | 1.486222  |
| 1 | -0.076343 | -2.741977 | 1.796935  |
| 7 | 1.951995  | 0.914748  | 1.504478  |
| 1 | 2.678809  | 1.571300  | 1.774591  |
| 1 | 2.229820  | -0.000122 | 1.852516  |
| 1 | 1.969951  | 0.843390  | 0.485250  |
| 7 | 0.355240  | 3.053794  | -0.327276 |
| 1 | 0.614339  | 2.849855  | 0.635032  |
| 1 | 0.313088  | 4.062204  | -0.432175 |
| 1 | -0.583888 | 2.676758  | -0.469453 |
| 7 | -1.157143 | 0.885401  | 1.943109  |
| 1 | -1.586147 | 1.428562  | 2.686211  |
| 1 | -0.144748 | 1.026764  | 1.997474  |
| 1 | -1.464525 | 1.280233  | 1.053076  |
| 7 | -2.978081 | -1.305126 | 0.554031  |
| 1 | -2.369644 | -2.110274 | 0.424445  |
| 1 | -3.872328 | -1.641387 | 0.896758  |
| 1 | -2.538637 | -0.748131 | 1.289844  |

-----

Cartesian coordinates of : AM9\_8

-----

Atomic number (AN) and Cartesian coordinates

| AN | X         | Y         | Z         |
|----|-----------|-----------|-----------|
| 7  | -1.315756 | 0.589631  | 1.843106  |
| 1  | -1.804821 | 0.474376  | 2.725957  |
| 1  | -1.339302 | -0.311386 | 1.365434  |
| 1  | -1.858973 | 1.238173  | 1.266109  |
| 7  | -0.376336 | 0.093195  | -1.683773 |
| 1  | -0.570707 | 0.139613  | -2.680104 |
| 1  | -1.198395 | -0.319021 | -1.243724 |
| 1  | 0.406970  | -0.554778 | -1.559434 |
| 7  | 2.203709  | -1.722303 | -1.159709 |
| 1  | 2.148673  | -2.208516 | -0.267921 |
| 1  | 2.703558  | -2.321517 | -1.809437 |
| 1  | 2.781816  | -0.894579 | -0.988079 |
| 7  | 1.568701  | -0.644884 | 1.738860  |
| 1  | 2.133836  | -0.786301 | 2.570768  |
| 1  | 0.820836  | 0.009388  | 1.978129  |
| 1  | 2.157812  | -0.174081 | 1.052838  |
| 7  | 3.616107  | 1.015906  | -0.323455 |
| 1  | 4.004060  | 1.353551  | -1.199789 |
| 1  | 2.801994  | 1.604391  | -0.100517 |
| 1  | 4.322901  | 1.177656  | 0.388008  |
| 7  | 0.889843  | 2.279180  | 0.173341  |
| 1  | 0.370597  | 2.075528  | 1.026577  |
| 1  | 0.698289  | 3.247733  | -0.065927 |
| 1  | 0.461556  | 1.686847  | -0.545547 |
| 7  | -2.647835 | 2.020062  | -0.567649 |
| 1  | -1.752594 | 2.083411  | -1.046504 |
| 1  | -3.039213 | 1.108835  | -0.809896 |
| 1  | -3.256804 | 2.746281  | -0.929183 |



|   |           |           |           |
|---|-----------|-----------|-----------|
| 7 | -0.603432 | -2.444157 | 0.412872  |
| 1 | 0.157274  | -1.968473 | 0.913204  |
| 1 | -0.245854 | -2.613179 | -0.525517 |
| 1 | -0.732855 | -3.351550 | 0.851816  |
| 7 | -3.317119 | -1.084354 | -0.396018 |
| 1 | -2.527479 | -1.639190 | -0.051163 |
| 1 | -3.883497 | -1.683708 | -0.988670 |
| 1 | -3.884850 | -0.835432 | 0.409551  |

-----

Cartesian coordinates of : AM9\_9

-----

Atomic number (AN) and Cartesian coordinates

| AN | X         | Y         | Z         |
|----|-----------|-----------|-----------|
| 7  | -2.328523 | 0.713165  | 1.118279  |
| 1  | -1.394984 | 0.920949  | 1.480007  |
| 1  | -2.474948 | -0.295652 | 1.210713  |
| 1  | -3.000783 | 1.168544  | 1.729082  |
| 7  | -1.602264 | -0.717905 | -1.654967 |
| 1  | -2.076878 | -0.030758 | -1.068433 |
| 1  | -2.101972 | -0.786456 | -2.535987 |
| 1  | -0.665076 | -0.352068 | -1.847210 |
| 7  | 1.162531  | 0.749709  | -1.562667 |
| 1  | 1.854004  | 0.978087  | -2.271704 |
| 1  | 0.625959  | 1.598481  | -1.377486 |
| 1  | 1.688619  | 0.531189  | -0.716292 |
| 7  | -1.271306 | 2.739264  | -1.058068 |
| 1  | -1.614975 | 3.681393  | -0.896266 |
| 1  | -1.800741 | 2.103872  | -0.453347 |
| 1  | -1.505653 | 2.503072  | -2.018725 |
| 7  | 3.259660  | 0.214730  | 1.055977  |
| 1  | 4.162478  | 0.612886  | 1.295843  |
| 1  | 2.960869  | -0.358114 | 1.841726  |
| 1  | 3.396455  | -0.438868 | 0.279088  |
| 7  | 2.614443  | -1.959059 | -0.998337 |
| 1  | 2.096402  | -1.634709 | -1.810879 |
| 1  | 1.924199  | -2.070443 | -0.250384 |
| 1  | 3.002462  | -2.870047 | -1.219817 |
| 7  | 0.643912  | 1.949127  | 1.450421  |
| 1  | 1.602124  | 1.639660  | 1.266908  |
| 1  | 0.312173  | 2.453529  | 0.628423  |
| 1  | 0.678410  | 2.607749  | 2.222694  |
| 7  | -2.708406 | -2.458199 | 0.688198  |
| 1  | -2.315511 | -2.196943 | -0.220015 |
| 1  | -2.229167 | -3.295432 | 1.005804  |
| 1  | -3.680925 | -2.712886 | 0.545317  |
| 7  | 0.317248  | -1.299462 | 0.976702  |
| 1  | -0.285783 | -1.687952 | 1.697811  |
| 1  | -0.255568 | -1.260742 | 0.132712  |
| 1  | 0.487749  | -0.327921 | 1.241640  |

-----

Cartesian coordinates of : AM9\_10

-----

Atomic number (AN) and Cartesian coordinates

| AN | X         | Y         | Z         |
|----|-----------|-----------|-----------|
| 7  | 1.607033  | 0.108641  | 1.751908  |
| 1  | 2.048642  | 0.342416  | 2.636238  |
| 1  | 1.836362  | 0.850836  | 1.088983  |
| 1  | 0.594671  | 0.135550  | 1.897836  |
| 7  | 2.218205  | 1.830408  | -0.985258 |
| 1  | 2.934695  | 2.518857  | -1.194721 |
| 1  | 2.641838  | 0.902248  | -1.076463 |
| 1  | 1.517678  | 1.883752  | -1.722903 |
| 7  | 0.469063  | -2.752082 | 0.379904  |
| 1  | 0.506470  | -3.529731 | 1.031242  |
| 1  | -0.501456 | -2.625581 | 0.093844  |
| 1  | 0.770948  | -1.913488 | 0.877875  |

|   |           |           |           |
|---|-----------|-----------|-----------|
| 7 | 2.985571  | -1.279664 | -0.722523 |
| 1 | 3.945041  | -1.552816 | -0.910794 |
| 1 | 2.394723  | -2.100420 | -0.859054 |
| 1 | 2.897584  | -1.062562 | 0.271105  |
| 7 | -0.399672 | 2.762078  | 0.712636  |
| 1 | -0.432425 | 3.716899  | 1.056347  |
| 1 | 0.526917  | 2.613884  | 0.307564  |
| 1 | -0.477278 | 2.140616  | 1.515295  |
| 7 | -1.558754 | -0.069909 | 1.753685  |
| 1 | -2.070232 | 0.400995  | 1.004624  |
| 1 | -2.124384 | -0.015330 | 2.595843  |
| 1 | -1.514749 | -1.050397 | 1.481419  |
| 7 | -2.591380 | 1.323035  | -1.010909 |
| 1 | -2.021211 | 1.053794  | -1.812349 |
| 1 | -3.422832 | 1.791211  | -1.358160 |
| 1 | -2.023586 | 2.016771  | -0.512346 |
| 7 | -0.008554 | -0.076544 | -1.371252 |
| 1 | -0.619784 | -0.873056 | -1.204067 |
| 1 | -0.063273 | 0.491227  | -0.525859 |
| 1 | 0.939058  | -0.452302 | -1.399457 |
| 7 | -2.630232 | -1.878886 | -0.641487 |
| 1 | -2.728105 | -2.264859 | -1.576790 |
| 1 | -2.841037 | -0.878226 | -0.699923 |
| 1 | -3.353240 | -2.309826 | -0.072263 |

-----

Cartesian coordinates of : AM9\_11

-----

Atomic number (AN) and Cartesian coordinates

| AN | X         | Y         | Z         |
|----|-----------|-----------|-----------|
| 7  | 0.946668  | 2.085376  | -1.326171 |
| 1  | 1.046381  | 2.703501  | -2.125814 |
| 1  | 1.053080  | 1.124676  | -1.659026 |
| 1  | 1.723231  | 2.275855  | -0.687698 |
| 7  | 0.291419  | -0.971035 | -1.925221 |
| 1  | 0.374780  | -1.440932 | -2.822175 |
| 1  | -0.610301 | -0.486415 | -1.913888 |
| 1  | 0.234068  | -1.700064 | -1.215185 |
| 7  | -2.007552 | -1.608988 | 0.345134  |
| 1  | -1.513500 | -0.896116 | 0.886955  |
| 1  | -2.302892 | -1.128521 | -0.504527 |
| 1  | -2.849995 | -1.859835 | 0.854293  |
| 7  | -0.040475 | 0.680159  | 1.323415  |
| 1  | 0.231873  | 1.217819  | 2.142826  |
| 1  | 0.023617  | 1.316761  | 0.524688  |
| 1  | 0.706835  | -0.002180 | 1.176397  |
| 7  | 0.431094  | -3.463284 | 0.443974  |
| 1  | -0.493982 | -3.019392 | 0.395340  |
| 1  | 0.436026  | -4.247798 | -0.201131 |
| 1  | 0.533751  | -3.851659 | 1.377092  |
| 7  | 2.534430  | -1.075890 | 0.239930  |
| 1  | 2.283853  | -0.760189 | -0.697315 |
| 1  | 3.515486  | -1.340600 | 0.224932  |
| 1  | 1.992853  | -1.933925 | 0.382306  |
| 7  | 3.087604  | 1.941934  | 0.977785  |
| 1  | 4.093873  | 2.054660  | 0.904066  |
| 1  | 2.808273  | 2.339038  | 1.869154  |
| 1  | 2.883811  | 0.939646  | 0.998081  |
| 7  | -2.107532 | 1.057363  | -1.549293 |
| 1  | -1.274411 | 1.636960  | -1.423556 |
| 1  | -2.705716 | 1.228935  | -0.737602 |
| 1  | -2.596770 | 1.405659  | -2.368481 |
| 7  | -3.174641 | 1.396014  | 1.383862  |
| 1  | -3.293527 | 2.303056  | 1.823527  |
| 1  | -2.219660 | 1.079049  | 1.558817  |
| 1  | -3.808139 | 0.750461  | 1.844022  |

-----

Cartesian coordinates of : AM9\_12

-----  
Atomic number (AN) and Cartesian coordinates

| AN | X         | Y         | Z         |
|----|-----------|-----------|-----------|
| 7  | 4.110781  | -0.126938 | -0.237634 |
| 1  | 4.938151  | 0.025723  | -0.805685 |
| 1  | 4.416478  | -0.176291 | 0.729399  |
| 1  | 3.505305  | 0.692798  | -0.331106 |
| 7  | 1.831908  | 2.009633  | -0.787711 |
| 1  | 1.049480  | 2.423090  | -0.268021 |
| 1  | 1.408635  | 1.346198  | -1.436587 |
| 1  | 2.259056  | 2.748544  | -1.338393 |
| 7  | -0.685500 | 2.478849  | 1.027687  |
| 1  | -1.602988 | 2.292044  | 0.612964  |
| 1  | -0.794047 | 3.246690  | 1.683041  |
| 1  | -0.419430 | 1.651744  | 1.561230  |
| 7  | 1.702412  | -2.042816 | -0.865949 |
| 1  | 1.110357  | -1.376670 | -1.365912 |
| 1  | 1.806703  | -2.865236 | -1.452507 |
| 1  | 2.625827  | -1.610464 | -0.773064 |
| 7  | -0.820048 | -2.378274 | 1.078196  |
| 1  | -0.868882 | -3.186942 | 1.690842  |
| 1  | -0.626802 | -1.565969 | 1.661946  |
| 1  | 0.011099  | -2.489015 | 0.490225  |
| 7  | -3.418146 | 1.605495  | -0.390299 |
| 1  | -4.223173 | 1.890374  | 0.159958  |
| 1  | -3.587715 | 1.929171  | -1.338435 |
| 1  | -3.412893 | 0.580740  | -0.416159 |
| 7  | 1.303531  | -0.034992 | 1.595743  |
| 1  | 1.739693  | 0.741956  | 1.096789  |
| 1  | 1.690396  | -0.056228 | 2.534815  |
| 1  | 1.606332  | -0.885756 | 1.118061  |
| 7  | -0.554658 | 0.089101  | -1.080328 |
| 1  | -0.960272 | 1.015298  | -1.201541 |
| 1  | -1.340460 | -0.557558 | -1.121197 |
| 1  | -0.237757 | 0.063771  | -0.109136 |
| 7  | -3.428620 | -1.597038 | -0.398090 |
| 1  | -4.250750 | -1.798158 | 0.164197  |
| 1  | -2.611651 | -1.956440 | 0.111957  |
| 1  | -3.522320 | -2.144543 | -1.248987 |

-----  
Cartesian coordinates of : AM9\_13-----  
Atomic number (AN) and Cartesian coordinates

| AN | X         | Y         | Z         |
|----|-----------|-----------|-----------|
| 7  | -2.437025 | 0.167545  | -1.773195 |
| 1  | -2.751800 | 0.799152  | -1.031960 |
| 1  | -1.581278 | 0.582499  | -2.140190 |
| 1  | -3.129293 | 0.173031  | -2.515699 |
| 7  | 0.000025  | -1.858864 | -0.928802 |
| 1  | -0.000051 | -2.668463 | -1.544334 |
| 1  | 0.817212  | -1.302785 | -1.187835 |
| 1  | -0.817056 | -1.302632 | -1.187845 |
| 7  | -2.725470 | 1.498824  | 1.038131  |
| 1  | -1.784365 | 1.736437  | 1.343675  |
| 1  | -2.866044 | 0.524549  | 1.309740  |
| 1  | -3.380397 | 2.074920  | 1.556727  |
| 7  | -2.578972 | -1.707951 | 0.808352  |
| 1  | -3.373981 | -2.268258 | 1.098595  |
| 1  | -1.773808 | -2.325234 | 0.718855  |
| 1  | -2.757920 | -1.350533 | -0.131988 |
| 7  | 2.725322  | 1.498946  | 1.038134  |
| 1  | 2.865919  | 0.524667  | 1.309718  |
| 1  | 3.380199  | 2.075051  | 1.556784  |
| 1  | 1.784191  | 1.736509  | 1.343636  |
| 7  | -0.000046 | 0.075503  | 1.706889  |
| 1  | 0.818196  | -0.499040 | 1.498211  |
| 1  | -0.000027 | 0.228732  | 2.712396  |
| 1  | -0.818282 | -0.499063 | 1.498242  |

|   |           |           |           |
|---|-----------|-----------|-----------|
| 7 | 2.579060  | -1.707893 | 0.808445  |
| 1 | 3.374062  | -2.268185 | 1.098736  |
| 1 | 2.758037  | -1.350505 | -0.131900 |
| 1 | 1.773902  | -2.325181 | 0.718946  |
| 7 | 0.000009  | 1.861181  | -0.965980 |
| 1 | 0.819572  | 2.459407  | -0.892477 |
| 1 | -0.000148 | 1.267034  | -0.131352 |
| 1 | -0.819384 | 2.459656  | -0.892629 |
| 7 | 2.437102  | 0.167514  | -1.773157 |
| 1 | 3.129320  | 0.173024  | -2.515707 |
| 1 | 2.751885  | 0.799163  | -1.031962 |
| 1 | 1.581309  | 0.582416  | -2.140107 |

-----

Cartesian coordinates of : AM9\_14

-----

Atomic number (AN) and Cartesian coordinates

| AN | X         | Y         | Z         |
|----|-----------|-----------|-----------|
| 7  | 2.126754  | 1.971259  | -0.604372 |
| 1  | 1.366432  | 2.472629  | -0.139709 |
| 1  | 2.551283  | 1.338477  | 0.071711  |
| 1  | 2.832689  | 2.652848  | -0.864270 |
| 7  | -1.378544 | -1.109125 | -1.853993 |
| 1  | -1.758693 | -1.236586 | -2.787396 |
| 1  | -1.485163 | -1.990734 | -1.356547 |
| 1  | -0.368632 | -0.980423 | -1.949048 |
| 7  | -0.476769 | 3.456263  | 0.483183  |
| 1  | -0.760095 | 3.837978  | 1.381085  |
| 1  | -1.248145 | 2.869523  | 0.140726  |
| 1  | -0.389484 | 4.245204  | -0.151275 |
| 7  | -2.660964 | 1.410810  | -0.308918 |
| 1  | -2.884778 | 0.956783  | 0.574050  |
| 1  | -2.230591 | 0.685295  | -0.890157 |
| 1  | -3.537643 | 1.679476  | -0.745673 |
| 7  | 1.828799  | -0.854590 | -1.663055 |
| 1  | 1.784523  | 0.161807  | -1.779911 |
| 1  | 2.501226  | -0.975763 | -0.901520 |
| 1  | 2.244251  | -1.246370 | -2.503559 |
| 7  | -2.651135 | -1.519011 | 1.149972  |
| 1  | -3.159398 | -1.317334 | 0.293151  |
| 1  | -1.872752 | -2.131197 | 0.894734  |
| 1  | -3.271643 | -2.035019 | 1.765567  |
| 7  | 0.174150  | -2.739899 | 0.411790  |
| 1  | 0.430348  | -2.259209 | 1.271456  |
| 1  | 0.670057  | -2.251965 | -0.338141 |
| 1  | 0.535168  | -3.687493 | 0.461302  |
| 7  | 0.076600  | 0.225597  | 1.084330  |
| 1  | -0.829824 | -0.143473 | 1.377684  |
| 1  | 0.042154  | 1.234093  | 1.228746  |
| 1  | 0.101493  | 0.107979  | 0.070176  |
| 7  | 2.975795  | -0.766662 | 1.293636  |
| 1  | 2.004582  | -0.480162 | 1.466628  |
| 1  | 3.573748  | -0.273292 | 1.949820  |
| 1  | 3.056094  | -1.755573 | 1.512366  |

-----

Cartesian coordinates of : AM9\_15

-----

Atomic number (AN) and Cartesian coordinates

| AN | X         | Y         | Z        |
|----|-----------|-----------|----------|
| 7  | 2.503446  | 1.644392  | 1.027264 |
| 1  | 2.889156  | 2.289055  | 1.709814 |
| 1  | 3.242959  | 1.406627  | 0.369714 |
| 1  | 1.779269  | 2.136707  | 0.493949 |
| 7  | -2.727814 | -1.788778 | 0.665749 |
| 1  | -3.467378 | -2.417302 | 0.961460 |
| 1  | -1.910064 | -2.348135 | 0.406532 |
| 1  | -2.449410 | -1.228163 | 1.467897 |

|   |           |           |           |
|---|-----------|-----------|-----------|
| 7 | 2.666982  | -1.603316 | 0.928126  |
| 1 | 3.322362  | -1.494430 | 0.157535  |
| 1 | 3.110921  | -2.177199 | 1.638224  |
| 1 | 2.542977  | -0.665136 | 1.312937  |
| 7 | 0.026365  | -2.553055 | -0.631751 |
| 1 | 0.192822  | -3.343826 | -1.246207 |
| 1 | 0.894986  | -2.357453 | -0.125822 |
| 1 | -0.192557 | -1.743540 | -1.212244 |
| 7 | -1.791498 | 0.016024  | -1.655489 |
| 1 | -2.165571 | 0.935658  | -1.424012 |
| 1 | -2.316085 | -0.646127 | -1.072949 |
| 1 | -2.025922 | -0.171403 | -2.626201 |
| 7 | 0.048893  | 2.486988  | -0.755590 |
| 1 | -0.084369 | 1.707428  | -1.398618 |
| 1 | 0.119362  | 3.333895  | -1.312358 |
| 1 | -0.825732 | 2.543331  | -0.228940 |
| 7 | -2.720287 | 1.758744  | 0.811701  |
| 1 | -2.027945 | 1.220627  | 1.339968  |
| 1 | -3.126916 | 2.452964  | 1.431017  |
| 1 | -3.461458 | 1.106309  | 0.566383  |
| 7 | -0.296514 | -0.030879 | 1.274831  |
| 1 | 0.520128  | 0.565873  | 1.406883  |
| 1 | 0.006652  | -0.977471 | 1.493790  |
| 1 | -0.503034 | -0.030241 | 0.274065  |
| 7 | 2.305256  | 0.034469  | -1.568196 |
| 1 | 1.643190  | 0.057522  | -0.793138 |
| 1 | 2.057515  | -0.770828 | -2.136651 |
| 1 | 2.130341  | 0.863138  | -2.129547 |

-----

Cartesian coordinates of : AM9\_16

-----

Atomic number (AN) and Cartesian coordinates

| AN | X         | Y         | Z         |
|----|-----------|-----------|-----------|
| 7  | 3.863987  | 1.841583  | 0.173140  |
| 1  | 3.946283  | 0.844277  | 0.388273  |
| 1  | 4.401634  | 2.030006  | -0.666703 |
| 1  | 4.294288  | 2.364034  | 0.929187  |
| 7  | -1.537803 | 1.561626  | 1.574078  |
| 1  | -1.524568 | 2.009301  | 2.484809  |
| 1  | -2.102698 | 0.715519  | 1.652383  |
| 1  | -0.585789 | 1.271021  | 1.350476  |
| 7  | -0.516996 | -1.740806 | 0.983628  |
| 1  | -0.059403 | -2.255068 | 1.730872  |
| 1  | -1.467275 | -1.531176 | 1.292807  |
| 1  | -0.028718 | -0.847474 | 0.875967  |
| 7  | -1.582103 | 2.518453  | -1.338143 |
| 1  | -1.029890 | 3.363010  | -1.456012 |
| 1  | -2.468994 | 2.680289  | -1.806339 |
| 1  | -1.770906 | 2.406729  | -0.335439 |
| 7  | -3.620059 | -0.819220 | 1.023105  |
| 1  | -4.343543 | -0.138108 | 1.234959  |
| 1  | -4.046307 | -1.736687 | 1.116071  |
| 1  | -3.355133 | -0.700909 | 0.038907  |
| 7  | 1.316255  | -2.347059 | -1.446508 |
| 1  | 0.922218  | -1.961459 | -2.300353 |
| 1  | 1.647636  | -3.280145 | -1.671891 |
| 1  | 0.557698  | -2.433522 | -0.764750 |
| 7  | 0.951118  | 0.744606  | -0.280423 |
| 1  | 1.323495  | -0.016727 | -0.848267 |
| 1  | 1.741591  | 1.372276  | -0.108729 |
| 1  | 0.276565  | 1.245184  | -0.860453 |
| 7  | -2.009981 | -0.604913 | -1.578326 |
| 1  | -1.652257 | 0.348966  | -1.649111 |
| 1  | -1.338597 | -1.164571 | -1.055288 |
| 1  | -2.082451 | -0.986880 | -2.515543 |
| 7  | 3.145055  | -1.090877 | 0.890097  |
| 1  | 2.741246  | -1.538128 | 0.064531  |
| 1  | 2.368190  | -0.691295 | 1.411042  |
| 1  | 3.569377  | -1.812209 | 1.464063  |

-----  
 Cartesian coordinates of : AM9\_17  
 -----

Atomic number (AN) and Cartesian coordinates

| AN | X         | Y         | Z         |
|----|-----------|-----------|-----------|
| 7  | -2.370922 | -1.047123 | 1.032861  |
| 1  | -2.952500 | -1.556649 | 1.691274  |
| 1  | -2.102345 | -1.686478 | 0.280230  |
| 1  | -2.953738 | -0.340638 | 0.588749  |
| 7  | -0.844275 | -2.590059 | -1.238937 |
| 1  | -1.105546 | -3.492405 | -1.624079 |
| 1  | -0.251770 | -2.750754 | -0.420400 |
| 1  | -0.233397 | -2.126053 | -1.911687 |
| 7  | 1.627622  | -0.875691 | -1.439908 |
| 1  | 1.125405  | -0.264057 | -0.793080 |
| 1  | 1.874096  | -1.695836 | -0.889665 |
| 1  | 2.494650  | -0.397468 | -1.669231 |
| 7  | 0.031362  | 1.082301  | 0.710477  |
| 1  | 0.816818  | 0.978886  | 1.351667  |
| 1  | -0.641734 | 0.344723  | 0.935066  |
| 1  | -0.460428 | 1.952274  | 0.920551  |
| 7  | 2.325696  | 2.199374  | -1.090487 |
| 1  | 2.457635  | 3.194148  | -0.934743 |
| 1  | 2.342058  | 2.054980  | -2.095936 |
| 1  | 1.390784  | 1.952343  | -0.757660 |
| 7  | 3.127362  | 0.235303  | 1.297943  |
| 1  | 3.725421  | -0.536312 | 1.014193  |
| 1  | 3.621363  | 0.726342  | 2.037817  |
| 1  | 3.064112  | 0.869940  | 0.496229  |
| 7  | -1.998013 | 0.498675  | -1.589717 |
| 1  | -1.932036 | -0.518982 | -1.635403 |
| 1  | -2.163034 | 0.829860  | -2.535596 |
| 1  | -1.069415 | 0.816550  | -1.310618 |
| 7  | -2.667908 | 2.517536  | 0.778072  |
| 1  | -2.955739 | 1.992389  | 1.598534  |
| 1  | -2.708443 | 1.890470  | -0.028758 |
| 1  | -3.345187 | 3.259928  | 0.638555  |
| 7  | 0.735687  | -2.014512 | 1.482145  |
| 1  | -0.178455 | -1.612039 | 1.690889  |
| 1  | 1.421546  | -1.257762 | 1.537376  |
| 1  | 0.953591  | -2.668035 | 2.228575  |

-----  
 Cartesian coordinates of : AM9\_18  
 -----

Atomic number (AN) and Cartesian coordinates

| AN | X         | Y         | Z         |
|----|-----------|-----------|-----------|
| 7  | 0.949811  | 2.650066  | 0.124922  |
| 1  | 1.201602  | 2.649580  | 1.110089  |
| 1  | 1.201552  | 3.559362  | -0.250603 |
| 1  | 1.553791  | 1.946661  | -0.314055 |
| 7  | 2.383430  | 0.010107  | -0.539450 |
| 1  | 1.894988  | -0.152540 | 0.345475  |
| 1  | 3.366585  | -0.238081 | -0.431698 |
| 1  | 1.970719  | -0.614145 | -1.226524 |
| 7  | 0.332295  | -0.150884 | 1.867349  |
| 1  | -0.006265 | -1.091441 | 1.664882  |
| 1  | -0.429787 | 0.487958  | 1.631289  |
| 1  | 0.474338  | -0.091153 | 2.871291  |
| 7  | -2.031727 | 1.796573  | 0.688893  |
| 1  | -2.576648 | 2.471217  | 1.217444  |
| 1  | -2.575482 | 1.543358  | -0.137122 |
| 1  | -1.179298 | 2.266750  | 0.369997  |
| 7  | -2.867987 | -1.307186 | 1.059638  |
| 1  | -2.046327 | -1.889263 | 0.891304  |
| 1  | -3.335845 | -1.671869 | 1.883386  |
| 1  | -2.526747 | -0.370732 | 1.282510  |

|   |           |           |           |
|---|-----------|-----------|-----------|
| 7 | -0.124450 | -2.654583 | 0.020059  |
| 1 | -0.442383 | -3.496354 | -0.450879 |
| 1 | -0.228385 | -1.866400 | -0.631536 |
| 1 | 0.868989  | -2.771942 | 0.201035  |
| 7 | -3.791396 | 0.079481  | -1.484890 |
| 1 | -4.680852 | 0.557716  | -1.375684 |
| 1 | -3.852948 | -0.454283 | -2.347024 |
| 1 | -3.693905 | -0.584363 | -0.707304 |
| 7 | 5.586120  | -0.431885 | -0.274452 |
| 1 | 5.902322  | -0.459393 | 0.689298  |
| 1 | 6.060233  | -1.176951 | -0.773916 |
| 1 | 5.892325  | 0.449686  | -0.673236 |
| 7 | -0.564479 | -0.005577 | -1.484124 |
| 1 | -1.568011 | 0.173896  | -1.541925 |
| 1 | -0.157193 | 0.294711  | -2.365725 |
| 1 | -0.188695 | 0.625230  | -0.776382 |

-----

Cartesian coordinates of : AM9\_19

-----

Atomic number (AN) and Cartesian coordinates

| AN | X         | Y         | Z         |
|----|-----------|-----------|-----------|
| 7  | 3.903192  | 1.767146  | 0.888328  |
| 1  | 4.258525  | 0.967655  | 0.359185  |
| 1  | 4.237219  | 2.615376  | 0.442646  |
| 1  | 4.312775  | 1.736173  | 1.816371  |
| 7  | 0.659258  | -2.805877 | 0.193317  |
| 1  | 1.028886  | -3.280690 | 1.011775  |
| 1  | 0.970416  | -3.330845 | -0.618569 |
| 1  | 1.085514  | -1.874531 | 0.151509  |
| 7  | -4.081023 | -0.231702 | 0.077086  |
| 1  | -3.360371 | -0.582183 | -0.567616 |
| 1  | -4.622331 | -1.027956 | 0.400814  |
| 1  | -4.716325 | 0.355292  | -0.455809 |
| 7  | -2.038011 | 2.079184  | 0.883043  |
| 1  | -2.276475 | 2.908656  | 1.417011  |
| 1  | -2.867885 | 1.487249  | 0.821980  |
| 1  | -1.359537 | 1.544295  | 1.421626  |
| 7  | 3.964492  | -0.906324 | -0.719510 |
| 1  | 2.978913  | -0.748195 | -0.495636 |
| 1  | 4.236024  | -1.801563 | -0.325843 |
| 1  | 4.050137  | -0.982277 | -1.727957 |
| 7  | -0.661773 | 1.926480  | -1.859343 |
| 1  | 0.080468  | 2.613680  | -1.955870 |
| 1  | -1.298884 | 2.074664  | -2.636767 |
| 1  | -1.170804 | 2.138840  | -0.991762 |
| 7  | 1.187060  | 0.241168  | 0.241015  |
| 1  | 0.741808  | 0.668937  | -0.571276 |
| 1  | 1.863599  | 0.915138  | 0.607921  |
| 1  | 0.446372  | 0.112666  | 0.933812  |
| 7  | -1.581902 | -1.114741 | -1.470509 |
| 1  | -1.012365 | -1.726357 | -0.885834 |
| 1  | -1.636694 | -1.549648 | -2.386882 |
| 1  | -1.074833 | -0.234912 | -1.587269 |
| 7  | -1.361320 | -0.886083 | 1.808152  |
| 1  | -2.258257 | -0.645770 | 1.386260  |
| 1  | -1.534032 | -1.097947 | 2.786133  |
| 1  | -1.031661 | -1.740512 | 1.359002  |

-----

Cartesian coordinates of : AM9\_20

-----

Atomic number (AN) and Cartesian coordinates

| AN | X         | Y         | Z        |
|----|-----------|-----------|----------|
| 7  | -2.109220 | 0.438655  | 1.743366 |
| 1  | -2.098206 | -0.537808 | 1.444164 |
| 1  | -2.857048 | 0.873741  | 1.206081 |
| 1  | -2.382520 | 0.461946  | 2.721146 |

|   |           |           |           |
|---|-----------|-----------|-----------|
| 7 | -1.960846 | 0.692255  | -1.651381 |
| 1 | -2.904320 | 0.676771  | -1.260914 |
| 1 | -2.048720 | 0.888986  | -2.643998 |
| 1 | -1.469528 | 1.486082  | -1.226802 |
| 7 | -0.376030 | 2.701382  | 0.152901  |
| 1 | -0.749729 | 2.126295  | 0.908654  |
| 1 | 0.627402  | 2.522442  | 0.098022  |
| 1 | -0.508611 | 3.676242  | 0.402143  |
| 7 | -1.803943 | -2.079268 | -0.197385 |
| 1 | -0.855039 | -2.205001 | 0.151035  |
| 1 | -1.742250 | -1.334522 | -0.900034 |
| 1 | -2.064176 | -2.940941 | -0.668183 |
| 7 | 2.586958  | -2.687889 | 0.049597  |
| 1 | 1.832677  | -1.995452 | 0.129591  |
| 1 | 2.420246  | -3.240430 | -0.785473 |
| 1 | 2.526691  | -3.317981 | 0.843076  |
| 7 | 2.875747  | 2.125653  | -0.206801 |
| 1 | 3.537184  | 1.341644  | -0.148447 |
| 1 | 2.905800  | 2.473846  | -1.160996 |
| 1 | 3.234996  | 2.866893  | 0.387875  |
| 7 | 4.706372  | -0.391242 | 0.013969  |
| 1 | 4.087971  | -1.210025 | 0.010748  |
| 1 | 5.375364  | -0.515382 | -0.740174 |
| 1 | 5.236733  | -0.420934 | 0.879831  |
| 7 | 0.676333  | -0.288349 | 0.196506  |
| 1 | 1.448533  | 0.380000  | 0.177732  |
| 1 | 0.110648  | -0.076891 | -0.626726 |
| 1 | 0.086643  | -0.013447 | 0.982010  |
| 7 | -4.545005 | -0.456885 | -0.114470 |
| 1 | -3.834998 | -1.165705 | 0.078450  |
| 1 | -5.131001 | -0.799883 | -0.869784 |
| 1 | -5.137307 | -0.380676 | 0.706864  |

-----  
 Cartesian coordinates of : AM9\_21

-----  
 Atomic number (AN) and Cartesian coordinates

| AN | X         | Y         | Z         |
|----|-----------|-----------|-----------|
| 7  | 0.416645  | -0.561874 | 1.898249  |
| 1  | -0.435534 | -1.077839 | 1.670857  |
| 1  | 0.569788  | -0.670727 | 2.896623  |
| 1  | 0.198512  | 0.421611  | 1.735326  |
| 7  | 0.429012  | 2.401076  | 0.358269  |
| 1  | 0.882964  | 3.066158  | 0.978442  |
| 1  | 0.033880  | 2.945978  | -0.404176 |
| 1  | 1.166862  | 1.804050  | -0.039719 |
| 7  | -2.371721 | -1.735443 | 0.646985  |
| 1  | -2.450520 | -1.696643 | -0.367144 |
| 1  | -2.513439 | -0.772257 | 0.976172  |
| 1  | -3.137344 | -2.303032 | 0.997206  |
| 7  | -2.495999 | 1.307118  | 1.234398  |
| 1  | -3.066938 | 1.486741  | 0.405064  |
| 1  | -1.597767 | 1.774436  | 1.104648  |
| 1  | -2.954734 | 1.732562  | 2.033568  |
| 7  | 2.398943  | 0.183650  | -0.447065 |
| 1  | 2.028343  | -0.247920 | 0.401664  |
| 1  | 2.123226  | -0.424878 | -1.213256 |
| 1  | 3.418298  | 0.186134  | -0.401333 |
| 7  | -3.817251 | 0.811283  | -1.523869 |
| 1  | -4.135353 | 1.225243  | -2.394104 |
| 1  | -2.886842 | 0.410242  | -1.679656 |
| 1  | -4.452112 | 0.049872  | -1.303577 |
| 7  | -0.826747 | -0.074665 | -1.424319 |
| 1  | -0.266934 | 0.488104  | -2.060669 |
| 1  | -0.355527 | -0.980984 | -1.352408 |
| 1  | -0.717280 | 0.361067  | -0.507755 |
| 7  | 5.639660  | 0.363672  | -0.372531 |
| 1  | 5.867783  | 1.285071  | -0.731406 |
| 1  | 6.119973  | -0.318237 | -0.950425 |
| 1  | 6.024556  | 0.295519  | 0.563901  |



|   |           |           |           |
|---|-----------|-----------|-----------|
| 7 | 0.486358  | -2.730088 | -0.387574 |
| 1 | 1.125053  | -2.324491 | 0.292714  |
| 1 | 0.811843  | -3.663164 | -0.617195 |
| 1 | -0.413063 | -2.805728 | 0.088832  |

-----

Cartesian coordinates of : AM9\_22

-----

Atomic number (AN) and Cartesian coordinates

| AN | X         | Y         | Z         |
|----|-----------|-----------|-----------|
| 7  | -5.333626 | -0.372811 | -0.010106 |
| 1  | -5.636126 | -0.149239 | 0.932402  |
| 1  | -5.899226 | 0.173683  | -0.651363 |
| 1  | -5.546447 | -1.351577 | -0.173806 |
| 7  | 0.679940  | -0.141118 | -1.485218 |
| 1  | 0.428223  | -0.718801 | -0.683261 |
| 1  | 0.265381  | 0.773937  | -1.315465 |
| 1  | 1.688277  | -0.021394 | -1.421740 |
| 7  | 3.091396  | -0.472436 | 0.728976  |
| 1  | 2.994569  | -1.273255 | 0.097044  |
| 1  | 3.879147  | -0.662235 | 1.341284  |
| 1  | 2.249460  | -0.451105 | 1.306494  |
| 7  | -0.271753 | -2.285257 | 1.002659  |
| 1  | -0.616834 | -3.127354 | 1.452469  |
| 1  | 0.206818  | -1.723551 | 1.704393  |
| 1  | -1.076775 | -1.726804 | 0.711325  |
| 7  | 0.299819  | 0.667883  | 1.789724  |
| 1  | -0.562608 | 0.479048  | 1.274642  |
| 1  | 0.833961  | 1.329154  | 1.226050  |
| 1  | 0.045798  | 1.137590  | 2.653697  |
| 7  | -0.657424 | 2.867850  | -0.518092 |
| 1  | -1.083121 | 3.283152  | 0.305873  |
| 1  | 0.353977  | 2.843567  | -0.355360 |
| 1  | -0.832337 | 3.499886  | -1.293717 |
| 7  | -2.127384 | -0.024004 | -0.348828 |
| 1  | -1.861967 | 0.952032  | -0.498095 |
| 1  | -3.142189 | -0.070041 | -0.248571 |
| 1  | -1.881154 | -0.508831 | -1.209811 |
| 7  | 2.468353  | 2.417804  | -0.145414 |
| 1  | 3.011202  | 3.073857  | 0.409728  |
| 1  | 2.721244  | 2.590638  | -1.115460 |
| 1  | 2.809317  | 1.473048  | 0.083572  |
| 7  | 2.042947  | -2.782149 | -1.121260 |
| 1  | 2.371810  | -3.723123 | -1.310245 |
| 1  | 1.685527  | -2.394427 | -1.990772 |
| 1  | 1.248200  | -2.838189 | -0.478394 |

-----

Cartesian coordinates of : AM9\_23

-----

Atomic number (AN) and Cartesian coordinates

| AN | X         | Y         | Z         |
|----|-----------|-----------|-----------|
| 7  | -0.392275 | -2.422338 | -1.735244 |
| 1  | -0.544411 | -3.398313 | -1.971123 |
| 1  | 0.318225  | -2.379877 | -0.999671 |
| 1  | -0.014445 | -1.971297 | -2.562924 |
| 7  | 1.095711  | -1.860470 | 0.982064  |
| 1  | 1.383673  | -0.957435 | 1.367185  |
| 1  | 1.626314  | -2.578815 | 1.466164  |
| 1  | 0.108139  | -1.986034 | 1.230454  |
| 7  | -2.059629 | -2.116128 | 0.977612  |
| 1  | -1.927896 | -2.208576 | -0.030013 |
| 1  | -2.671949 | -2.865888 | 1.283425  |
| 1  | -2.547784 | -1.234154 | 1.136711  |
| 7  | -0.704479 | 0.568674  | -0.276703 |
| 1  | 0.093784  | 0.507405  | 0.355668  |
| 1  | -0.739912 | -0.318501 | -0.779695 |
| 1  | -1.534603 | 0.569001  | 0.318278  |

|   |           |           |           |
|---|-----------|-----------|-----------|
| 7 | -3.715583 | 0.785851  | 0.984141  |
| 1 | -4.593131 | 0.318789  | 0.774849  |
| 1 | -3.832957 | 1.241207  | 1.884448  |
| 1 | -3.586646 | 1.521371  | 0.281250  |
| 7 | -2.685246 | 2.722755  | -1.250850 |
| 1 | -2.469708 | 3.706387  | -1.123734 |
| 1 | -3.032018 | 2.614129  | -2.198674 |
| 1 | -1.813178 | 2.192619  | -1.171506 |
| 7 | 1.823491  | 1.187647  | 1.746214  |
| 1 | 2.784172  | 1.238038  | 1.390790  |
| 1 | 1.866251  | 1.234621  | 2.760225  |
| 1 | 1.356078  | 2.036566  | 1.437836  |
| 7 | 4.474445  | 1.199825  | 0.144895  |
| 1 | 3.854796  | 0.815085  | -0.575739 |
| 1 | 4.899131  | 2.047703  | -0.216290 |
| 1 | 5.223073  | 0.533564  | 0.304953  |
| 7 | 2.187604  | -0.060374 | -1.508156 |
| 1 | 1.392562  | 0.572262  | -1.572305 |
| 1 | 1.935594  | -0.778925 | -0.826334 |
| 1 | 2.298567  | -0.509019 | -2.412032 |

-----

Cartesian coordinates of : AM9\_24

-----

Atomic number (AN) and Cartesian coordinates

| AN | X         | Y         | Z         |
|----|-----------|-----------|-----------|
| 7  | 4.474433  | -1.199864 | -0.144967 |
| 1  | 3.854804  | -0.815117 | 0.575680  |
| 1  | 4.899134  | -2.047735 | 0.216215  |
| 1  | 5.223054  | -0.533603 | -0.305057 |
| 7  | -0.392172 | 2.422404  | 1.735221  |
| 1  | -0.544217 | 3.398396  | 1.971089  |
| 1  | -0.014369 | 1.971341  | 2.562902  |
| 1  | 0.318314  | 2.379873  | 0.999639  |
| 7  | -2.685279 | -2.722803 | 1.250781  |
| 1  | -1.813181 | -2.192711 | 1.171496  |
| 1  | -3.032099 | -2.614164 | 2.198587  |
| 1  | -2.469784 | -3.706447 | 1.123677  |
| 7  | -2.059585 | 2.116175  | -0.977615 |
| 1  | -2.671916 | 2.865937  | -1.283401 |
| 1  | -2.547763 | 1.234203  | -1.136659 |
| 1  | -1.927781 | 2.208646  | 0.029999  |
| 7  | 2.187630  | 0.060326  | 1.508144  |
| 1  | 1.935635  | 0.778910  | 0.826352  |
| 1  | 2.298601  | 0.508930  | 2.412040  |
| 1  | 1.392574  | -0.572296 | 1.572262  |
| 7  | 1.823396  | -1.187707 | -1.746143 |
| 1  | 1.355984  | -2.036591 | -1.437665 |
| 1  | 1.866065  | -1.234750 | -2.760155 |
| 1  | 2.784106  | -1.238100 | -1.390799 |
| 7  | 1.095753  | 1.860439  | -0.982086 |
| 1  | 1.383669  | 0.957359  | -1.367137 |
| 1  | 1.626432  | 2.578715  | -1.466202 |
| 1  | 0.108202  | 1.986053  | -1.230531 |
| 7  | -0.704523 | -0.568628 | 0.276783  |
| 1  | -0.739966 | 0.318540  | 0.779787  |
| 1  | 0.093712  | -0.507324 | -0.355620 |
| 1  | -1.534670 | -0.568973 | -0.318166 |
| 7  | -3.715612 | -0.785768 | -0.984098 |
| 1  | -3.832976 | -1.241076 | -1.884431 |
| 1  | -4.593159 | -0.318711 | -0.774792 |
| 1  | -3.586683 | -1.521328 | -0.281248 |

-----

Cartesian coordinates of : AM9\_25

-----

Atomic number (AN) and Cartesian coordinates

| AN | X | Y | Z |
|----|---|---|---|
|----|---|---|---|

-----

|   |           |           |           |
|---|-----------|-----------|-----------|
| 7 | 1.220917  | 1.416402  | -1.884024 |
| 1 | 1.889407  | 1.248264  | -1.119989 |
| 1 | 1.217980  | 2.414162  | -2.075766 |
| 1 | 1.588398  | 0.959567  | -2.713812 |
| 7 | -1.630439 | 0.021291  | -1.628483 |
| 1 | -2.180152 | 0.438937  | -0.876857 |
| 1 | -2.152918 | 0.175126  | -2.486725 |
| 1 | -0.762823 | 0.561292  | -1.708436 |
| 7 | -3.383457 | 2.037055  | 0.314457  |
| 1 | -3.619032 | 2.509629  | -0.553014 |
| 1 | -2.403679 | 2.247052  | 0.536707  |
| 1 | -3.966003 | 2.444745  | 1.039618  |
| 7 | -0.452548 | 1.674042  | 1.017377  |
| 1 | 0.159127  | 2.118094  | 1.695663  |
| 1 | 0.129779  | 1.435680  | 0.215149  |
| 1 | -0.767981 | 0.789632  | 1.420771  |
| 7 | -2.454168 | -2.862974 | -0.663513 |
| 1 | -3.233717 | -3.196806 | -1.221359 |
| 1 | -1.738530 | -3.582341 | -0.684257 |
| 1 | -2.073744 | -2.025740 | -1.115106 |
| 7 | 0.462050  | -1.484676 | 0.377063  |
| 1 | 0.699800  | -2.472165 | 0.362541  |
| 1 | 0.106772  | -1.241550 | -0.547033 |
| 1 | -0.336528 | -1.373066 | 1.004395  |
| 7 | -2.434644 | -0.774772 | 1.649223  |
| 1 | -2.796496 | -0.926872 | 2.585887  |
| 1 | -2.629946 | -1.615052 | 1.098718  |
| 1 | -2.978142 | -0.016266 | 1.232805  |
| 7 | 2.774229  | 0.620916  | 0.620303  |
| 1 | 2.090596  | -0.136111 | 0.724262  |
| 1 | 2.749383  | 1.175866  | 1.470281  |
| 1 | 3.706483  | 0.210496  | 0.556657  |
| 7 | 5.759085  | -0.625272 | 0.276319  |
| 1 | 6.271747  | -0.035104 | -0.370611 |
| 1 | 5.686533  | -1.547388 | -0.140997 |
| 1 | 6.316501  | -0.714163 | 1.119458  |

-----

Cartesian coordinates of : AM9\_26

-----

Atomic number (AN) and Cartesian coordinates

| AN | X         | Y         | Z         |
|----|-----------|-----------|-----------|
| 7  | 4.728031  | -1.500473 | -0.707130 |
| 1  | 4.645345  | -1.916793 | -1.628736 |
| 1  | 5.412057  | -0.753312 | -0.767108 |
| 1  | 5.099922  | -2.207606 | -0.081874 |
| 7  | -0.594003 | -1.979875 | -0.314063 |
| 1  | -0.424249 | -2.899650 | -0.709597 |
| 1  | -1.379759 | -1.575151 | -0.821298 |
| 1  | 0.223204  | -1.396933 | -0.515466 |
| 7  | -0.952119 | 1.681537  | 1.398041  |
| 1  | -1.767702 | 1.069613  | 1.279502  |
| 1  | -0.231898 | 1.078269  | 1.798725  |
| 1  | -1.198059 | 2.362366  | 2.111872  |
| 7  | 0.128346  | -1.051975 | 2.572570  |
| 1  | -0.230065 | -1.497458 | 1.721661  |
| 1  | 0.679043  | -1.740160 | 3.076798  |
| 1  | -0.669368 | -0.818155 | 3.157201  |
| 7  | -0.613243 | 1.093086  | -1.728026 |
| 1  | -0.882060 | 1.538974  | -0.848999 |
| 1  | 0.262598  | 0.612696  | -1.512422 |
| 1  | -0.395134 | 1.830095  | -2.392348 |
| 7  | 1.502897  | 3.110627  | -0.053425 |
| 1  | 1.325245  | 3.591170  | -0.929604 |
| 1  | 0.604308  | 2.787751  | 0.313191  |
| 1  | 1.878536  | 3.795998  | 0.594345  |
| 7  | 1.886251  | -0.042722 | -0.044885 |
| 1  | 2.072982  | 0.959123  | -0.123388 |
| 1  | 2.768676  | -0.537570 | -0.179397 |
| 1  | 1.584855  | -0.201745 | 0.917219  |

|   |           |           |           |
|---|-----------|-----------|-----------|
| 7 | -3.080143 | -0.625219 | 1.046106  |
| 1 | -2.485921 | -1.428242 | 1.239582  |
| 1 | -3.954680 | -0.756590 | 1.544650  |
| 1 | -3.279501 | -0.670604 | 0.043882  |
| 7 | -3.081396 | -0.647440 | -2.146206 |
| 1 | -2.976973 | -1.361712 | -2.860639 |
| 1 | -2.258463 | -0.031471 | -2.187304 |
| 1 | -3.895290 | -0.095728 | -2.401324 |

-----

Cartesian coordinates of : AM9\_27

-----

Atomic number (AN) and Cartesian coordinates

| AN | X         | Y         | Z         |
|----|-----------|-----------|-----------|
| 7  | 5.183035  | -0.323098 | -1.028864 |
| 1  | 5.621908  | -0.080494 | -0.146451 |
| 1  | 5.600514  | -1.188538 | -1.354233 |
| 1  | 5.418144  | 0.401996  | -1.698476 |
| 7  | 1.328062  | 2.493257  | 1.671481  |
| 1  | 2.016654  | 3.237115  | 1.609999  |
| 1  | 1.091807  | 2.395292  | 2.653918  |
| 1  | 1.776841  | 1.622909  | 1.359701  |
| 7  | -3.594485 | -1.059256 | 0.682347  |
| 1  | -2.712618 | -0.810653 | 1.152770  |
| 1  | -4.359234 | -0.789332 | 1.294354  |
| 1  | -3.627656 | -2.072379 | 0.609733  |
| 7  | -1.154200 | -1.223645 | -1.428488 |
| 1  | -1.223848 | -1.454801 | -2.414967 |
| 1  | -2.102834 | -1.150438 | -1.063788 |
| 1  | -0.752575 | -0.284811 | -1.360467 |
| 7  | -3.418908 | 1.437568  | -1.288580 |
| 1  | -3.569889 | 0.604691  | -0.713569 |
| 1  | -4.144319 | 2.109224  | -1.057156 |
| 1  | -3.564279 | 1.165432  | -2.256265 |
| 7  | 0.549300  | -2.849767 | 0.582744  |
| 1  | 1.310560  | -3.370564 | 0.157495  |
| 1  | -0.028307 | -3.523004 | 1.077730  |
| 1  | -0.017096 | -2.445253 | -0.173591 |
| 7  | 2.176439  | -0.039635 | 0.157706  |
| 1  | 1.855882  | -0.928581 | 0.539039  |
| 1  | 3.044758  | -0.208787 | -0.349673 |
| 1  | 1.465748  | 0.263537  | -0.508132 |
| 7  | -0.823425 | -0.213756 | 1.645450  |
| 1  | -0.542917 | 0.389078  | 0.871538  |
| 1  | -0.635231 | 0.309834  | 2.495189  |
| 1  | -0.180658 | -1.006326 | 1.627886  |
| 7  | -0.319098 | 1.819210  | -0.928102 |
| 1  | -1.335775 | 1.933692  | -0.979141 |
| 1  | 0.075849  | 2.291838  | -1.736294 |
| 1  | 0.031543  | 2.303173  | -0.097005 |

-----

Cartesian coordinates of : AM9\_28

-----

Atomic number (AN) and Cartesian coordinates

| AN | X         | Y         | Z         |
|----|-----------|-----------|-----------|
| 7  | -0.194506 | -1.296946 | 0.977107  |
| 1  | -0.893778 | -1.752877 | 1.562245  |
| 1  | 0.653428  | -1.862636 | 0.984063  |
| 1  | -0.569879 | -1.326008 | 0.027103  |
| 7  | 1.479351  | -1.177939 | -1.780861 |
| 1  | 1.923954  | -1.548323 | -2.615554 |
| 1  | 0.483315  | -1.391324 | -1.846471 |
| 1  | 1.849666  | -1.702439 | -0.985029 |
| 7  | 2.965828  | -2.192352 | 0.947365  |
| 1  | 3.038742  | -1.191855 | 1.153826  |
| 1  | 2.880748  | -2.687628 | 1.830250  |
| 1  | 3.846025  | -2.486349 | 0.534232  |

|   |           |           |           |
|---|-----------|-----------|-----------|
| 7 | 2.252002  | 0.725124  | 0.691841  |
| 1 | 2.248549  | 1.738009  | 0.770049  |
| 1 | 1.319542  | 0.390802  | 0.946421  |
| 1 | 2.346981  | 0.504585  | -0.298438 |
| 7 | -1.745766 | -0.736856 | -1.844092 |
| 1 | -2.107131 | -1.065487 | -2.734606 |
| 1 | -2.543307 | -0.538114 | -1.243548 |
| 1 | -1.298160 | 0.169904  | -1.996141 |
| 7 | -3.223045 | -1.822261 | 1.176862  |
| 1 | -3.130620 | -0.834806 | 0.934350  |
| 1 | -4.179586 | -1.994138 | 1.467228  |
| 1 | -3.051335 | -2.368071 | 0.337440  |
| 7 | 0.160277  | 1.797787  | -1.709691 |
| 1 | 0.498539  | 2.389255  | -0.948671 |
| 1 | 0.277705  | 2.321694  | -2.572182 |
| 1 | 0.778591  | 0.984350  | -1.757883 |
| 7 | -2.058681 | 1.100083  | 0.597811  |
| 1 | -1.632402 | 1.558166  | -0.208491 |
| 1 | -2.422757 | 1.808765  | 1.226205  |
| 1 | -1.312319 | 0.580887  | 1.064312  |
| 7 | 0.409006  | 3.517004  | 1.006600  |
| 1 | 1.037061  | 3.991886  | 1.647968  |
| 1 | -0.021277 | 2.744813  | 1.509113  |
| 1 | -0.331559 | 4.171429  | 0.771607  |

-----

Cartesian coordinates of : AM9\_29

-----

Atomic number (AN) and Cartesian coordinates

| AN | X         | Y         | Z         |
|----|-----------|-----------|-----------|
| 7  | 1.989351  | 0.041216  | -0.441480 |
| 1  | 1.503106  | -0.728309 | 0.026974  |
| 1  | 1.892555  | -0.128126 | -1.439404 |
| 1  | 2.981978  | -0.025078 | -0.213201 |
| 7  | 0.276237  | 2.250011  | 0.980802  |
| 1  | 0.853525  | 2.908666  | 1.494874  |
| 1  | -0.169654 | 2.763043  | 0.224309  |
| 1  | 0.902315  | 1.569476  | 0.533199  |
| 7  | 0.220590  | -2.237671 | 0.983233  |
| 1  | -0.468049 | -2.774782 | 0.462237  |
| 1  | -0.304726 | -1.537296 | 1.517413  |
| 1  | 0.658006  | -2.868227 | 1.648302  |
| 7  | -1.425804 | 0.033236  | 2.433503  |
| 1  | -2.378343 | 0.195310  | 2.116459  |
| 1  | -0.860765 | 0.792868  | 2.038065  |
| 1  | -1.418818 | 0.135975  | 3.443766  |
| 7  | 5.135978  | -0.068559 | 0.379401  |
| 1  | 5.558499  | 0.849379  | 0.287527  |
| 1  | 5.182607  | -0.330745 | 1.358624  |
| 1  | 5.709203  | -0.724500 | -0.140850 |
| 7  | -2.813351 | -1.573138 | -0.049597 |
| 1  | -2.871396 | -0.549368 | -0.070560 |
| 1  | -3.735891 | -1.939740 | -0.263230 |
| 1  | -2.599217 | -1.826425 | 0.911606  |
| 7  | -2.740725 | 1.585894  | -0.092097 |
| 1  | -3.534934 | 2.110924  | -0.445704 |
| 1  | -2.000620 | 1.626383  | -0.802042 |
| 1  | -2.382896 | 2.085281  | 0.718313  |
| 7  | -0.417310 | -1.583269 | -2.111252 |
| 1  | -0.533252 | -2.190483 | -2.916579 |
| 1  | -1.257567 | -1.664449 | -1.530183 |
| 1  | 0.345843  | -1.954923 | -1.550683 |
| 7  | -0.347941 | 1.546896  | -2.132543 |
| 1  | 0.574921  | 1.748530  | -1.755007 |
| 1  | -0.400740 | 1.966645  | -3.055684 |
| 1  | -0.384864 | 0.527664  | -2.248327 |

-----

Cartesian coordinates of : AM9\_30

-----  
Atomic number (AN) and Cartesian coordinates

| AN | X         | Y         | Z         |
|----|-----------|-----------|-----------|
| 7  | 5.183946  | -1.068707 | -0.574299 |
| 1  | 5.352431  | -2.061871 | -0.696628 |
| 1  | 5.565434  | -0.592655 | -1.385196 |
| 1  | 5.714006  | -0.766191 | 0.236553  |
| 7  | -1.278136 | 0.680610  | 1.268231  |
| 1  | -0.522138 | 1.311226  | 1.536674  |
| 1  | -0.930919 | 0.125013  | 0.485246  |
| 1  | -1.416307 | 0.026074  | 2.034009  |
| 7  | -0.828823 | -2.509714 | 1.006258  |
| 1  | -0.131699 | -2.150834 | 1.652583  |
| 1  | -0.690267 | -3.513037 | 0.938645  |
| 1  | -0.650514 | -2.094780 | 0.085244  |
| 7  | 2.116721  | -0.299406 | 0.138497  |
| 1  | 3.060960  | -0.558884 | -0.149499 |
| 1  | 1.541415  | -1.136429 | 0.093888  |
| 1  | 1.726763  | 0.345329  | -0.551294 |
| 7  | -0.629554 | -0.981865 | -1.699968 |
| 1  | 0.140159  | -0.357229 | -1.932053 |
| 1  | -1.470261 | -0.402279 | -1.748137 |
| 1  | -0.699385 | -1.677169 | -2.437330 |
| 7  | -2.903399 | 1.240607  | -1.261716 |
| 1  | -3.485618 | 1.943439  | -1.705602 |
| 1  | -3.466369 | 0.399755  | -1.119793 |
| 1  | -2.670989 | 1.551232  | -0.317231 |
| 7  | 0.297209  | 1.967864  | -1.213747 |
| 1  | -0.696070 | 1.805363  | -1.392075 |
| 1  | 0.593536  | 2.718573  | -1.830060 |
| 1  | 0.385391  | 2.307856  | -0.255311 |
| 7  | -3.708852 | -1.170785 | 0.496758  |
| 1  | -4.524610 | -1.707634 | 0.774120  |
| 1  | -3.660301 | -0.350944 | 1.097303  |
| 1  | -2.881297 | -1.730479 | 0.714186  |
| 7  | 1.506402  | 2.177326  | 1.833559  |
| 1  | 2.189848  | 2.873929  | 1.551319  |
| 1  | 1.846543  | 1.261907  | 1.516331  |
| 1  | 1.491663  | 2.179210  | 2.849092  |

-----  
Cartesian coordinates of : AM9\_31-----  
Atomic number (AN) and Cartesian coordinates

| AN | X         | Y         | Z         |
|----|-----------|-----------|-----------|
| 7  | -4.559587 | 1.301013  | 0.053209  |
| 1  | -4.986292 | 1.375908  | 0.971541  |
| 1  | -4.331036 | 0.313917  | -0.101838 |
| 1  | -5.268477 | 1.566643  | -0.623335 |
| 7  | -3.369867 | -1.546661 | -0.360973 |
| 1  | -3.197775 | -1.795761 | -1.330077 |
| 1  | -3.683833 | -2.386609 | 0.114692  |
| 1  | -2.478263 | -1.257971 | 0.053584  |
| 7  | -0.714088 | -0.382185 | 0.834874  |
| 1  | -1.011826 | 0.575081  | 0.622798  |
| 1  | -0.542715 | -0.421796 | 1.836118  |
| 1  | 0.186582  | -0.517276 | 0.369228  |
| 7  | -1.696356 | 2.511647  | -0.181685 |
| 1  | -1.647911 | 3.432361  | 0.245786  |
| 1  | -2.671474 | 2.197029  | -0.111042 |
| 1  | -1.494490 | 2.642126  | -1.169667 |
| 7  | 1.790694  | -1.116515 | -0.979769 |
| 1  | 1.627464  | -2.110653 | -0.817904 |
| 1  | 1.288797  | -0.880273 | -1.832512 |
| 1  | 2.779573  | -0.929754 | -1.164115 |
| 7  | 4.290667  | 0.660294  | -0.949475 |
| 1  | 5.260694  | 0.801018  | -1.210323 |
| 1  | 4.223991  | 0.673753  | 0.068979  |
| 1  | 3.755184  | 1.455487  | -1.292417 |

|   |           |           |           |
|---|-----------|-----------|-----------|
| 7 | 1.584202  | 2.086192  | -0.301284 |
| 1 | 1.655481  | 1.073264  | -0.387403 |
| 1 | 0.617484  | 2.287386  | -0.051400 |
| 1 | 2.170991  | 2.353590  | 0.484274  |
| 7 | 2.921000  | 0.027705  | 1.839019  |
| 1 | 2.249814  | 0.578138  | 2.366174  |
| 1 | 2.407382  | -0.454928 | 1.100716  |
| 1 | 3.302998  | -0.671732 | 2.467878  |
| 7 | -0.095683 | -3.442689 | -0.073683 |
| 1 | -0.592119 | -2.608937 | 0.240601  |
| 1 | 0.015957  | -4.057430 | 0.726388  |
| 1 | -0.693050 | -3.924185 | -0.738361 |

-----

Cartesian coordinates of : AM9\_32

-----

Atomic number (AN) and Cartesian coordinates

| AN | X         | Y         | Z         |
|----|-----------|-----------|-----------|
| 7  | -4.012696 | -1.481698 | 1.341210  |
| 1  | -4.522661 | -0.652993 | 1.018121  |
| 1  | -4.504765 | -2.299662 | 0.995293  |
| 1  | -4.076034 | -1.507271 | 2.354182  |
| 7  | -5.286802 | 1.139884  | 0.191486  |
| 1  | -5.516895 | 1.889554  | 0.836290  |
| 1  | -4.451024 | 1.422867  | -0.331229 |
| 1  | -6.056098 | 1.071790  | -0.467494 |
| 7  | 4.578320  | 1.792876  | 1.495200  |
| 1  | 4.502523  | 1.479276  | 2.457657  |
| 1  | 5.291859  | 2.514012  | 1.464891  |
| 1  | 3.693016  | 2.222600  | 1.243068  |
| 7  | 1.649793  | -0.034151 | 1.309817  |
| 1  | 1.522080  | 0.646819  | 2.051581  |
| 1  | 2.599250  | -0.395478 | 1.365524  |
| 1  | 1.575279  | 0.441240  | 0.408439  |
| 7  | 4.059409  | -0.384618 | -0.751060 |
| 1  | 4.516431  | 0.219066  | -0.066584 |
| 1  | 4.731536  | -0.585322 | -1.485113 |
| 1  | 3.298698  | 0.155931  | -1.164947 |
| 7  | 1.676309  | -2.433523 | -0.653836 |
| 1  | 1.707853  | -3.440068 | -0.778704 |
| 1  | 2.635435  | -2.080766 | -0.615115 |
| 1  | 1.272322  | -2.240961 | 0.260540  |
| 7  | -1.217612 | -0.813574 | 0.039780  |
| 1  | -0.918119 | -1.556287 | -0.588050 |
| 1  | -2.063492 | -1.131966 | 0.522758  |
| 1  | -0.470491 | -0.709655 | 0.726633  |
| 7  | -2.571307 | 1.663734  | -1.252985 |
| 1  | -2.097277 | 0.860446  | -0.822201 |
| 1  | -2.032443 | 2.497776  | -1.041309 |
| 1  | -2.544384 | 1.537438  | -2.260121 |
| 7  | 1.055940  | 0.402026  | -1.747214 |
| 1  | 1.153741  | -0.618037 | -1.738701 |
| 1  | 1.134897  | 0.721911  | -2.707901 |
| 1  | 0.099279  | 0.581038  | -1.444289 |

-----

Cartesian coordinates of : AM9\_33

-----

Atomic number (AN) and Cartesian coordinates

| AN | X         | Y         | Z         |
|----|-----------|-----------|-----------|
| 7  | -3.110354 | -0.234617 | 0.215931  |
| 1  | -4.124094 | -0.330279 | 0.165509  |
| 1  | -2.732607 | -1.052490 | 0.689844  |
| 1  | -2.725672 | -0.255858 | -0.729440 |
| 7  | -0.315743 | -1.374806 | 0.570945  |
| 1  | -0.515827 | -1.297215 | -0.424761 |
| 1  | 0.667591  | -1.623469 | 0.663751  |
| 1  | -0.426909 | -0.432662 | 0.940813  |

|   |           |           |           |
|---|-----------|-----------|-----------|
| 7 | -1.222377 | 1.998626  | 1.013546  |
| 1 | -1.996167 | 1.337584  | 0.840044  |
| 1 | -1.152561 | 2.113412  | 2.021541  |
| 1 | -1.509796 | 2.901872  | 0.645758  |
| 7 | -0.932701 | 0.513288  | -1.965386 |
| 1 | -0.000596 | 0.160565  | -2.194497 |
| 1 | -1.255774 | 1.069500  | -2.751280 |
| 1 | -0.809954 | 1.143002  | -1.172566 |
| 7 | 2.983894  | -1.883486 | 0.952643  |
| 1 | 3.152390  | -2.795859 | 0.537884  |
| 1 | 3.805460  | -1.298269 | 0.769018  |
| 1 | 2.928453  | -2.032993 | 1.956521  |
| 7 | 1.948441  | 1.272621  | 0.828980  |
| 1 | 0.976204  | 1.543665  | 0.657260  |
| 1 | 1.949601  | 0.260394  | 0.961729  |
| 1 | 2.199799  | 1.686851  | 1.723231  |
| 7 | 4.860687  | 0.428018  | 0.086966  |
| 1 | 5.112201  | 0.341615  | -0.892943 |
| 1 | 4.020910  | 1.008565  | 0.140756  |
| 1 | 5.618506  | 0.921782  | 0.547783  |
| 7 | 2.093156  | -0.284368 | -1.853403 |
| 1 | 2.230690  | -0.975549 | -1.117555 |
| 1 | 2.312799  | 0.616125  | -1.431964 |
| 1 | 2.765064  | -0.470387 | -2.590875 |
| 7 | -6.352826 | -0.547300 | 0.110746  |
| 1 | -6.651421 | -1.125799 | -0.667500 |
| 1 | -6.814037 | 0.352002  | 0.021602  |
| 1 | -6.689497 | -0.981943 | 0.963556  |

-----

Cartesian coordinates of : AM9\_34

-----

Atomic number (AN) and Cartesian coordinates

| AN | X         | Y         | Z         |
|----|-----------|-----------|-----------|
| 7  | 0.022195  | -0.226675 | 1.083378  |
| 1  | 0.422270  | -0.578968 | 1.948602  |
| 1  | -0.066874 | -1.027011 | 0.459125  |
| 1  | -0.915580 | 0.117151  | 1.302144  |
| 7  | 0.935676  | -2.830694 | -0.740070 |
| 1  | 1.415276  | -3.309178 | -1.497516 |
| 1  | 0.227443  | -3.474105 | -0.397485 |
| 1  | 1.622153  | -2.695698 | 0.011464  |
| 7  | 3.112209  | -2.054814 | 1.335781  |
| 1  | 3.209022  | -1.160306 | 0.838269  |
| 1  | 2.957261  | -1.848542 | 2.317836  |
| 1  | 3.999103  | -2.545681 | 1.277194  |
| 7  | 2.730131  | 0.458084  | -0.336466 |
| 1  | 3.153261  | 1.382482  | -0.419950 |
| 1  | 1.817922  | 0.547023  | 0.117544  |
| 1  | 2.555343  | 0.109780  | -1.274997 |
| 7  | -2.797171 | 1.075848  | 1.946794  |
| 1  | -3.467354 | 1.368960  | 1.227254  |
| 1  | -3.338131 | 0.707182  | 2.723875  |
| 1  | -2.336491 | 1.914994  | 2.287877  |
| 7  | -4.760126 | 1.475608  | -0.444579 |
| 1  | -4.423231 | 0.537492  | -0.686442 |
| 1  | -4.518974 | 2.097597  | -1.209680 |
| 1  | -5.773038 | 1.447686  | -0.389304 |
| 7  | -0.441974 | -0.239090 | -1.979422 |
| 1  | -0.115328 | 0.528202  | -1.397706 |
| 1  | -0.257557 | -0.001068 | -2.948188 |
| 1  | 0.112190  | -1.061677 | -1.729269 |
| 7  | -3.100151 | -1.076948 | -0.519329 |
| 1  | -2.312405 | -0.820210 | -1.122213 |
| 1  | -2.829899 | -0.842820 | 0.434310  |
| 1  | -3.215063 | -2.083879 | -0.573445 |
| 7  | 4.164163  | 3.366517  | -0.387273 |
| 1  | 4.833812  | 3.299558  | 0.372280  |
| 1  | 3.517429  | 4.115277  | -0.162065 |
| 1  | 4.672786  | 3.640919  | -1.221207 |



-----  
 Cartesian coordinates of : AM9\_35  
 -----

Atomic number (AN) and Cartesian coordinates

| AN | X         | Y         | Z         |
|----|-----------|-----------|-----------|
| 7  | -3.756399 | 0.170759  | 0.451648  |
| 1  | -3.839962 | -0.231613 | 1.380791  |
| 1  | -3.588871 | -0.608535 | -0.190190 |
| 1  | -4.659094 | 0.584904  | 0.217687  |
| 7  | -2.665774 | -2.285676 | -1.213869 |
| 1  | -2.268864 | -2.173579 | -2.141302 |
| 1  | -2.996199 | -3.242767 | -1.144217 |
| 1  | -1.910500 | -2.156498 | -0.529790 |
| 7  | -0.651053 | -1.451096 | 0.969892  |
| 1  | -0.760454 | -0.439803 | 0.886607  |
| 1  | -0.944088 | -1.698818 | 1.910633  |
| 1  | 0.348498  | -1.655292 | 0.906152  |
| 7  | -1.130818 | 1.740449  | 0.292240  |
| 1  | -1.205706 | 2.687624  | 0.652233  |
| 1  | -2.070378 | 1.320007  | 0.330531  |
| 1  | -0.876565 | 1.820883  | -0.688467 |
| 7  | 2.483261  | -2.103275 | 0.519893  |
| 1  | 3.172510  | -2.420854 | 1.195301  |
| 1  | 2.246211  | -2.909199 | -0.051982 |
| 1  | 2.947453  | -1.418108 | -0.090411 |
| 7  | 3.633888  | 0.329169  | -0.985311 |
| 1  | 3.233906  | 0.578719  | -1.884336 |
| 1  | 4.614390  | 0.610167  | -0.997452 |
| 1  | 3.147130  | 0.872855  | -0.268207 |
| 7  | 1.797931  | 0.997455  | 1.447772  |
| 1  | 1.850763  | -0.018323 | 1.514517  |
| 1  | 0.841194  | 1.225059  | 1.168731  |
| 1  | 1.939260  | 1.373461  | 2.380098  |
| 7  | 6.781560  | 1.104389  | -0.802196 |
| 1  | 7.205604  | 1.722042  | -1.486236 |
| 1  | 6.892821  | 1.533970  | 0.110398  |
| 1  | 7.308416  | 0.237272  | -0.800914 |
| 7  | -6.524227 | 1.450501  | -0.653371 |
| 1  | -7.357915 | 1.581602  | -0.090395 |
| 1  | -6.757927 | 0.810903  | -1.405849 |
| 1  | -6.290210 | 2.345199  | -1.070821 |

-----

Cartesian coordinates of ammonia decamer: (NH3)10

Cartesian coordinates of : AM10\_1

Atomic number (AN) and Cartesian coordinates

| AN | X         | Y         | Z         |
|----|-----------|-----------|-----------|
| 7  | 2.097545  | 2.171213  | -0.107042 |
| 1  | 2.238258  | 1.393651  | 0.546624  |
| 1  | 2.809871  | 2.868519  | 0.090841  |
| 1  | 2.312148  | 1.774128  | -1.020793 |
| 7  | -2.569830 | -1.916855 | -1.251441 |
| 1  | -1.690256 | -1.417163 | -1.430998 |
| 1  | -3.078942 | -1.991056 | -2.126796 |
| 1  | -2.334528 | -2.861337 | -0.959422 |
| 7  | -0.113973 | -0.097194 | -1.116740 |
| 1  | -0.090668 | -0.205643 | -0.102119 |
| 1  | -0.430322 | 0.858644  | -1.281284 |
| 1  | 0.859991  | -0.144449 | -1.421903 |
| 7  | -0.775423 | 3.140979  | -1.049716 |
| 1  | -0.709641 | 3.696987  | -1.897134 |
| 1  | 0.177875  | 2.971152  | -0.713656 |
| 1  | -1.239900 | 3.716301  | -0.352194 |

|   |           |           |           |
|---|-----------|-----------|-----------|
| 7 | -0.487716 | 1.387290  | 1.880425  |
| 1 | 0.163479  | 1.875090  | 1.264673  |
| 1 | -0.601572 | 1.955145  | 2.714878  |
| 1 | -1.393358 | 1.349128  | 1.397699  |
| 7 | 3.053131  | -0.700520 | -1.341660 |
| 1 | 3.448280  | -0.317301 | -0.486054 |
| 1 | 3.815911  | -0.922782 | -1.973255 |
| 1 | 2.599729  | -1.574029 | -1.067317 |
| 7 | 0.883534  | -2.843012 | -0.321547 |
| 1 | 0.480893  | -2.596427 | -1.223205 |
| 1 | 0.172297  | -2.601754 | 0.379681  |
| 1 | 1.013915  | -3.849920 | -0.304263 |
| 7 | -2.934999 | 1.000678  | 0.022305  |
| 1 | -3.871649 | 1.373028  | 0.142559  |
| 1 | -3.025410 | 0.055315  | -0.352601 |
| 1 | -2.456768 | 1.574614  | -0.672596 |
| 7 | -1.274982 | -1.710523 | 1.620628  |
| 1 | -1.000758 | -0.793936 | 1.977389  |
| 1 | -1.596390 | -2.260444 | 2.411718  |
| 1 | -2.077970 | -1.552705 | 1.012081  |
| 7 | 2.092902  | -0.462609 | 1.648803  |
| 1 | 1.214740  | -0.090427 | 2.015304  |
| 1 | 2.646039  | -0.776072 | 2.440937  |
| 1 | 1.853386  | -1.292386 | 1.103096  |

-----

Cartesian coordinates of : AM10\_2

-----

Atomic number (AN) and Cartesian coordinates

| AN | X         | Y         | Z         |
|----|-----------|-----------|-----------|
| 7  | 0.287833  | -1.828430 | 1.783265  |
| 1  | 0.217473  | -2.492947 | 2.548256  |
| 1  | -0.519548 | -1.203556 | 1.845278  |
| 1  | 0.192759  | -2.354786 | 0.912774  |
| 7  | -2.492422 | 1.559456  | -1.291163 |
| 1  | -3.275925 | 2.069875  | -1.686778 |
| 1  | -1.794561 | 2.244544  | -0.984411 |
| 1  | -2.046656 | 1.041919  | -2.046468 |
| 7  | 1.440757  | 1.162965  | 1.782925  |
| 1  | 2.050717  | 1.433862  | 2.548625  |
| 1  | 1.945190  | 1.343432  | 0.912996  |
| 1  | 1.302696  | 0.151382  | 1.844763  |
| 7  | 0.049878  | 3.179065  | -0.146429 |
| 1  | 0.946764  | 2.951959  | -0.579039 |
| 1  | 0.158220  | 2.921434  | 0.833697  |
| 1  | -0.071510 | 4.186023  | -0.196089 |
| 7  | -1.725655 | 0.664188  | 1.783879  |
| 1  | -2.264237 | 1.056984  | 2.550289  |
| 1  | -2.135524 | 1.010521  | 0.914489  |
| 1  | -0.780545 | 1.050583  | 1.844351  |
| 7  | -2.779327 | -1.547052 | -0.145831 |
| 1  | -2.612106 | -1.328180 | 0.835385  |
| 1  | -3.591556 | -2.154134 | -0.199447 |
| 1  | -3.028534 | -0.654920 | -0.576163 |
| 7  | -0.105002 | -2.934700 | -1.293916 |
| 1  | -1.047162 | -2.674916 | -0.985212 |
| 1  | 0.119283  | -2.285311 | -2.045651 |
| 1  | -0.155415 | -3.866181 | -1.694793 |
| 7  | 2.596171  | 1.376663  | -1.292961 |
| 1  | 2.840988  | 0.430094  | -0.985485 |
| 1  | 1.923901  | 1.248441  | -2.047058 |
| 1  | 3.429409  | 1.799457  | -1.690305 |
| 7  | -0.000755 | 0.000483  | -1.033232 |
| 1  | -0.799805 | -0.496410 | -0.642337 |
| 1  | -0.032241 | 0.942417  | -0.646043 |
| 1  | 0.830105  | -0.441720 | -0.642990 |
| 7  | 2.728762  | -1.633127 | -0.146484 |
| 1  | 2.081807  | -2.294816 | -0.578704 |
| 1  | 2.453524  | -1.598827 | 0.834220  |
| 1  | 3.660804  | -2.032804 | -0.198507 |

-----  
 Cartesian coordinates of : AM10\_3  
 -----

Atomic number (AN) and Cartesian coordinates

| AN | X         | Y         | Z         |
|----|-----------|-----------|-----------|
| 7  | 2.210464  | -0.348613 | 1.543381  |
| 1  | 3.051984  | -0.239933 | 2.101872  |
| 1  | 1.473842  | 0.207220  | 1.982477  |
| 1  | 2.400982  | 0.078011  | 0.635962  |
| 7  | 0.052589  | -0.277297 | -1.002966 |
| 1  | -0.811107 | -0.194366 | -1.541635 |
| 1  | 0.602616  | 0.555918  | -1.209123 |
| 1  | -0.217309 | -0.180603 | -0.023909 |
| 7  | -0.650903 | 0.721219  | 2.363211  |
| 1  | -0.794720 | -0.288707 | 2.313699  |
| 1  | -0.909291 | 1.017930  | 3.299681  |
| 1  | -1.314256 | 1.148973  | 1.711744  |
| 7  | -0.197321 | -2.335528 | 1.285436  |
| 1  | -0.209267 | -3.225519 | 1.774656  |
| 1  | 0.722021  | -1.907366 | 1.434512  |
| 1  | -0.249104 | -2.533691 | 0.288210  |
| 7  | -2.125883 | 1.955296  | -0.207872 |
| 1  | -2.754909 | 2.752914  | -0.225867 |
| 1  | -1.169395 | 2.318629  | -0.272108 |
| 1  | -2.296146 | 1.414943  | -1.057494 |
| 7  | -3.097885 | -1.031173 | 0.589531  |
| 1  | -2.950515 | -0.024364 | 0.672339  |
| 1  | -3.879767 | -1.282060 | 1.186327  |
| 1  | -2.266346 | -1.489782 | 0.964735  |
| 7  | 2.630712  | -1.984595 | -1.100059 |
| 1  | 1.659333  | -1.670923 | -1.191157 |
| 1  | 2.756283  | -2.834259 | -1.639875 |
| 1  | 2.768634  | -2.206858 | -0.117580 |
| 7  | 0.910796  | 2.678872  | 0.293011  |
| 1  | 1.713699  | 2.236817  | -0.159087 |
| 1  | 0.722520  | 2.167654  | 1.155500  |
| 1  | 1.184869  | 3.622794  | 0.547788  |
| 7  | 3.129938  | 1.021319  | -1.411530 |
| 1  | 3.181571  | -0.002995 | -1.467030 |
| 1  | 4.071545  | 1.366058  | -1.246978 |
| 1  | 2.857093  | 1.356894  | -2.331694 |
| 7  | -2.859966 | -0.418967 | -2.389263 |
| 1  | -3.707212 | -0.015941 | -2.778194 |
| 1  | -3.106199 | -0.878753 | -1.505759 |
| 1  | -2.549245 | -1.132372 | -3.042172 |

-----  
 Cartesian coordinates of : AM10\_4  
 -----

Atomic number (AN) and Cartesian coordinates

| AN | X         | Y         | Z         |
|----|-----------|-----------|-----------|
| 7  | -1.312548 | -1.508385 | -1.753940 |
| 1  | -1.471681 | -2.185758 | -1.001259 |
| 1  | -1.639378 | -1.929746 | -2.618627 |
| 1  | -0.300456 | -1.381978 | -1.837450 |
| 7  | 1.653528  | -0.426489 | -1.819343 |
| 1  | 2.199779  | -0.605368 | -2.656910 |
| 1  | 2.310765  | -0.351367 | -1.042082 |
| 1  | 1.216126  | 0.489278  | -1.928958 |
| 7  | -1.584174 | -2.853156 | 1.012326  |
| 1  | -2.111178 | -2.034352 | 1.312387  |
| 1  | -0.597374 | -2.699826 | 1.225257  |
| 1  | -1.903729 | -3.651254 | 1.550851  |
| 7  | 1.589947  | -2.541768 | 0.615103  |
| 1  | 2.387443  | -1.908164 | 0.692133  |
| 1  | 1.243693  | -2.425327 | -0.336209 |
| 1  | 1.935197  | -3.492911 | 0.701458  |

|   |           |           |           |
|---|-----------|-----------|-----------|
| 7 | -0.821297 | 1.669712  | -1.730256 |
| 1 | -1.180804 | 0.715314  | -1.821869 |
| 1 | -1.340985 | 2.109807  | -0.968035 |
| 1 | -1.071482 | 2.162970  | -2.582778 |
| 7 | -3.070445 | -0.005119 | 0.463180  |
| 1 | -2.971233 | 1.008934  | 0.427989  |
| 1 | -2.699971 | -0.378799 | -0.413958 |
| 1 | -4.063838 | -0.213851 | 0.490897  |
| 7 | -0.032705 | 0.184081  | 1.123205  |
| 1 | -0.999728 | -0.107577 | 1.276820  |
| 1 | 0.083635  | 0.176164  | 0.108110  |
| 1 | 0.555183  | -0.579723 | 1.455677  |
| 7 | -1.666412 | 2.830104  | 1.119901  |
| 1 | -1.006696 | 2.108276  | 1.419444  |
| 1 | -1.140633 | 3.689148  | 0.985888  |
| 1 | -2.314534 | 2.994405  | 1.884706  |
| 7 | 3.487146  | 0.069411  | 0.846063  |
| 1 | 3.350846  | 0.044025  | 1.853387  |
| 1 | 3.105578  | 0.965718  | 0.523201  |
| 1 | 4.490030  | 0.081423  | 0.685566  |
| 7 | 1.717675  | 2.491808  | 0.132836  |
| 1 | 1.080026  | 2.414276  | -0.660944 |
| 1 | 1.935324  | 3.472367  | 0.276713  |
| 1 | 1.195068  | 2.142505  | 0.935070  |

-----

Cartesian coordinates of : AM10\_5

-----

Atomic number (AN) and Cartesian coordinates

| AN | X         | Y         | Z         |
|----|-----------|-----------|-----------|
| 7  | -1.451320 | 2.319491  | -0.890604 |
| 1  | -0.546068 | 2.705875  | -0.619636 |
| 1  | -1.225734 | 1.613768  | -1.591492 |
| 1  | -1.976853 | 3.054309  | -1.354790 |
| 7  | -1.033598 | 1.126239  | 2.051671  |
| 1  | -1.455346 | 1.589607  | 2.851096  |
| 1  | -1.386359 | 0.166095  | 2.028448  |
| 1  | -1.392968 | 1.580281  | 1.209421  |
| 7  | 1.496904  | 2.298102  | 0.458591  |
| 1  | 2.294312  | 1.659612  | 0.440323  |
| 1  | 0.845181  | 1.948890  | 1.164456  |
| 1  | 1.840518  | 3.198213  | 0.780352  |
| 7  | 1.387893  | -2.211043 | -0.713752 |
| 1  | 1.738169  | -3.157945 | -0.826225 |
| 1  | 0.418666  | -2.207079 | -1.041569 |
| 1  | 1.355378  | -2.012952 | 0.289263  |
| 7  | -1.542336 | -1.483752 | -1.823379 |
| 1  | -0.965397 | -0.700815 | -2.137275 |
| 1  | -1.766746 | -2.043812 | -2.640483 |
| 1  | -2.418562 | -1.089752 | -1.468131 |
| 7  | 1.562131  | -0.758678 | 2.106137  |
| 1  | 0.849410  | -0.031591 | 2.204035  |
| 1  | 1.898543  | -0.978913 | 3.038912  |
| 1  | 2.339689  | -0.341223 | 1.594181  |
| 7  | -1.413395 | -1.915284 | 1.385384  |
| 1  | -1.394759 | -1.948699 | 0.363034  |
| 1  | -1.853774 | -2.772570 | 1.705763  |
| 1  | -0.442153 | -1.934821 | 1.696663  |
| 7  | 3.610451  | 0.004872  | -0.318410 |
| 1  | 3.004790  | -0.754236 | -0.643456 |
| 1  | 3.814050  | 0.588843  | -1.125311 |
| 1  | 4.491834  | -0.406680 | -0.025062 |
| 7  | 0.850463  | 0.584203  | -2.211517 |
| 1  | 1.279476  | -0.304995 | -1.953584 |
| 1  | 1.086419  | 1.256001  | -1.478143 |
| 1  | 1.278097  | 0.902982  | -3.075440 |
| 7  | -3.588345 | 0.006794  | -0.060456 |
| 1  | -3.214623 | -0.481101 | 0.752074  |
| 1  | -4.564894 | 0.217016  | 0.116609  |
| 1  | -3.082221 | 0.889088  | -0.139678 |

-----  
Cartesian coordinates of : AM10\_6  
-----

Atomic number (AN) and Cartesian coordinates

| AN | X         | Y         | Z         |
|----|-----------|-----------|-----------|
| 7  | 0.388368  | 1.482206  | 1.902227  |
| 1  | -0.513862 | 1.004690  | 1.956966  |
| 1  | 1.086712  | 0.736609  | 1.840094  |
| 1  | 0.533249  | 1.956964  | 2.788824  |
| 7  | -2.869108 | 1.513763  | -0.488192 |
| 1  | -2.633061 | 1.189742  | 0.449643  |
| 1  | -3.751161 | 2.013155  | -0.425349 |
| 1  | -2.147313 | 2.191946  | -0.747229 |
| 7  | -1.921195 | -0.757639 | 1.707512  |
| 1  | -1.188210 | -1.442401 | 1.893241  |
| 1  | -2.439259 | -1.138602 | 0.909280  |
| 1  | -2.544783 | -0.757873 | 2.509884  |
| 7  | -2.801074 | -1.516810 | -1.197014 |
| 1  | -1.928626 | -1.674558 | -1.695600 |
| 1  | -2.971860 | -0.506045 | -1.225736 |
| 1  | -3.541694 | -1.979305 | -1.714531 |
| 7  | -0.228804 | 3.189248  | -0.701687 |
| 1  | 0.010862  | 2.723581  | 0.179792  |
| 1  | 0.492679  | 2.950041  | -1.376310 |
| 1  | -0.187535 | 4.192865  | -0.554139 |
| 7  | -0.166977 | -2.902982 | 0.349053  |
| 1  | -0.012298 | -2.144207 | -0.319186 |
| 1  | 0.463340  | -3.663911 | 0.114005  |
| 1  | -1.119094 | -3.227968 | 0.198094  |
| 7  | -0.075753 | -0.064890 | -0.972055 |
| 1  | -0.615155 | 0.495505  | -1.630091 |
| 1  | 0.795670  | 0.445470  | -0.813190 |
| 1  | -0.596750 | -0.001076 | -0.095196 |
| 7  | 2.225595  | -1.157492 | 1.360668  |
| 1  | 2.571381  | -1.442907 | 0.438794  |
| 1  | 1.368109  | -1.693196 | 1.502729  |
| 1  | 2.895260  | -1.479040 | 2.053883  |
| 7  | 2.737730  | 1.534857  | -0.276109 |
| 1  | 2.229169  | 2.290866  | 0.176422  |
| 1  | 3.685254  | 1.860325  | -0.443481 |
| 1  | 2.778136  | 0.776279  | 0.407266  |
| 7  | 2.655210  | -1.338151 | -1.720029 |
| 1  | 3.168763  | -1.783666 | -2.473020 |
| 1  | 2.845209  | -0.337209 | -1.748524 |
| 1  | 1.658920  | -1.430842 | -1.907954 |

-----  
Cartesian coordinates of : AM10\_7  
-----

Atomic number (AN) and Cartesian coordinates

| AN | X         | Y         | Z         |
|----|-----------|-----------|-----------|
| 7  | 3.137052  | 1.817556  | -0.208588 |
| 1  | 2.123502  | 1.957169  | -0.280313 |
| 1  | 3.543065  | 2.671162  | 0.163054  |
| 1  | 3.489148  | 1.708467  | -1.156108 |
| 7  | 1.325816  | -0.445928 | -2.068692 |
| 1  | 1.201384  | 0.423912  | -1.550718 |
| 1  | 1.559570  | -0.202721 | -3.027029 |
| 1  | 2.137557  | -0.917914 | -1.659002 |
| 7  | -0.029551 | 1.899661  | -0.242990 |
| 1  | -0.278180 | 1.537514  | 0.680607  |
| 1  | -0.661923 | 1.436392  | -0.901690 |
| 1  | -0.274763 | 2.886434  | -0.245363 |
| 7  | -1.818489 | -0.010163 | -2.136261 |
| 1  | -2.409521 | -0.716948 | -1.688846 |
| 1  | -0.888782 | -0.420411 | -2.246316 |
| 1  | -2.186990 | 0.154961  | -3.068347 |

|   |           |           |           |
|---|-----------|-----------|-----------|
| 7 | 3.610460  | -1.368880 | -0.173861 |
| 1 | 3.858438  | -0.393687 | -0.010127 |
| 1 | 3.029980  | -1.642387 | 0.615919  |
| 1 | 4.456448  | -1.928501 | -0.158167 |
| 7 | 1.802501  | -0.095562 | 2.075625  |
| 1 | 0.904128  | 0.344998  | 2.278832  |
| 1 | 2.331830  | -0.131980 | 2.941568  |
| 1 | 2.309173  | 0.516526  | 1.435002  |
| 7 | -3.456982 | 1.488551  | 0.172461  |
| 1 | -2.886300 | 1.164199  | -0.612469 |
| 1 | -4.428469 | 1.325744  | -0.076795 |
| 1 | -3.335329 | 2.494521  | 0.244568  |
| 7 | -1.340817 | 0.315488  | 2.183123  |
| 1 | -2.180061 | 0.726135  | 1.767193  |
| 1 | -1.174437 | -0.568350 | 1.698395  |
| 1 | -1.552336 | 0.095680  | 3.152140  |
| 7 | -3.208255 | -1.709174 | 0.018041  |
| 1 | -3.504966 | -0.946106 | 0.622018  |
| 1 | -2.241724 | -1.931830 | 0.269642  |
| 1 | -3.785521 | -2.516816 | 0.227937  |
| 7 | -0.040468 | -2.011181 | 0.357750  |
| 1 | 0.126557  | -3.014009 | 0.363799  |
| 1 | 0.664187  | -1.588327 | 0.968762  |
| 1 | 0.185454  | -1.686392 | -0.584400 |

-----

Cartesian coordinates of : AM10\_8

-----

Atomic number (AN) and Cartesian coordinates

| AN | X         | Y         | Z         |
|----|-----------|-----------|-----------|
| 7  | 2.971255  | -1.215290 | 0.383173  |
| 1  | 3.918224  | -1.501180 | 0.611985  |
| 1  | 2.688884  | -0.505119 | 1.059479  |
| 1  | 3.003370  | -0.767037 | -0.533655 |
| 7  | 2.157156  | 2.143924  | -0.123606 |
| 1  | 2.687015  | 3.005415  | -0.035335 |
| 1  | 2.647868  | 1.550135  | -0.793054 |
| 1  | 2.172043  | 1.668266  | 0.780044  |
| 7  | 1.024567  | 0.427544  | 2.305599  |
| 1  | 0.693129  | -0.527625 | 2.166222  |
| 1  | 1.151481  | 0.555831  | 3.305436  |
| 1  | 0.262690  | 1.047393  | 2.014060  |
| 7  | 0.327838  | -2.603255 | 1.067507  |
| 1  | 0.427797  | -3.324651 | 1.776295  |
| 1  | 1.271225  | -2.370071 | 0.730885  |
| 1  | -0.177574 | -3.026825 | 0.292556  |
| 7  | -0.968633 | 2.453783  | 0.848894  |
| 1  | -1.274818 | 3.325046  | 1.271915  |
| 1  | -0.081035 | 2.637762  | 0.377278  |
| 1  | -1.650863 | 2.207084  | 0.126104  |
| 7  | -2.228033 | -0.658300 | 1.459022  |
| 1  | -1.873845 | 0.296690  | 1.379821  |
| 1  | -2.811613 | -0.694743 | 2.289538  |
| 1  | -1.421275 | -1.262122 | 1.625137  |
| 7  | -0.045868 | -0.029890 | -0.937480 |
| 1  | 0.503435  | 0.789853  | -0.675251 |
| 1  | -1.009386 | 0.297029  | -1.012483 |
| 1  | -0.013305 | -0.654430 | -0.132485 |
| 7  | 2.536748  | -0.014410 | -2.563341 |
| 1  | 1.566223  | -0.236086 | -2.320693 |
| 1  | 2.921325  | -0.800837 | -3.078400 |
| 1  | 2.513937  | 0.772720  | -3.205480 |
| 7  | -3.247988 | 1.231079  | -1.018020 |
| 1  | -3.780903 | 1.888162  | -1.579737 |
| 1  | -3.803393 | 1.010740  | -0.194904 |
| 1  | -3.181643 | 0.351685  | -1.537592 |
| 7  | -2.556525 | -1.710474 | -1.513818 |
| 1  | -2.995635 | -2.599176 | -1.726411 |
| 1  | -2.553818 | -1.570367 | -0.499929 |
| 1  | -1.593154 | -1.736529 | -1.836862 |

-----  
Cartesian coordinates of : AM10\_9  
-----

Atomic number (AN) and Cartesian coordinates

| AN | X         | Y         | Z         |
|----|-----------|-----------|-----------|
| 7  | -2.137908 | -2.250615 | -0.156299 |
| 1  | -1.913869 | -1.963015 | 0.795185  |
| 1  | -2.681060 | -3.107125 | -0.098730 |
| 1  | -1.235610 | -2.490042 | -0.570951 |
| 7  | 2.863022  | 1.532306  | -1.513769 |
| 1  | 3.367471  | 1.285921  | -2.360412 |
| 1  | 2.802474  | 2.546573  | -1.497220 |
| 1  | 1.905567  | 1.161805  | -1.596213 |
| 7  | -0.022093 | -1.017280 | 1.943251  |
| 1  | 0.170390  | -1.491843 | 2.820715  |
| 1  | 0.525709  | -0.149513 | 1.931676  |
| 1  | 0.340822  | -1.607381 | 1.194144  |
| 7  | 1.513651  | 1.693792  | 1.451791  |
| 1  | 0.727262  | 2.241538  | 1.084099  |
| 1  | 2.212845  | 1.656551  | 0.710027  |
| 1  | 1.918812  | 2.219915  | 2.220546  |
| 7  | 0.167835  | 0.205665  | -1.127557 |
| 1  | 0.004307  | 0.532140  | -0.176064 |
| 1  | -0.725416 | 0.307452  | -1.615143 |
| 1  | 0.340444  | -0.795504 | -1.048483 |
| 7  | -2.726028 | 0.590385  | 1.388629  |
| 1  | -3.189106 | 0.859615  | 2.251605  |
| 1  | -3.330384 | -0.075479 | 0.913974  |
| 1  | -1.875759 | 0.078055  | 1.641890  |
| 7  | -1.030252 | 2.857847  | 0.031863  |
| 1  | -1.408238 | 3.798234  | 0.088608  |
| 1  | -1.725295 | 2.213978  | 0.421481  |
| 1  | -0.928472 | 2.630060  | -0.954272 |
| 7  | -2.866197 | 0.368146  | -1.833135 |
| 1  | -3.187786 | 1.036217  | -1.138260 |
| 1  | -2.814385 | -0.545874 | -1.375105 |
| 1  | -3.556124 | 0.324733  | -2.575437 |
| 7  | 1.085934  | -2.925469 | -0.709303 |
| 1  | 1.212058  | -3.082430 | -1.705883 |
| 1  | 1.137990  | -3.837947 | -0.264721 |
| 1  | 1.892565  | -2.375800 | -0.382627 |
| 7  | 3.149972  | -0.963157 | 0.449389  |
| 1  | 2.690011  | -0.582949 | 1.274181  |
| 1  | 3.255973  | -0.173555 | -0.192664 |
| 1  | 4.081258  | -1.255668 | 0.730030  |

-----  
Cartesian coordinates of : AM10\_10  
-----

Atomic number (AN) and Cartesian coordinates

| AN | X         | Y         | Z         |
|----|-----------|-----------|-----------|
| 7  | -0.715493 | 2.654902  | -0.836722 |
| 1  | -0.999994 | 3.402595  | -1.462495 |
| 1  | 0.104258  | 2.976489  | -0.312385 |
| 1  | -1.470112 | 2.520140  | -0.163785 |
| 7  | 1.842086  | 2.664411  | 0.893697  |
| 1  | 2.281084  | 3.232278  | 1.610819  |
| 1  | 2.579540  | 2.250126  | 0.328890  |
| 1  | 1.352564  | 1.884503  | 1.337798  |
| 7  | 0.166983  | 0.107037  | 0.923582  |
| 1  | -0.263181 | 0.529745  | 0.099743  |
| 1  | 0.977112  | -0.400385 | 0.570978  |
| 1  | -0.496667 | -0.600115 | 1.241464  |
| 7  | -2.631905 | 0.151693  | -1.327524 |
| 1  | -3.396592 | 0.209579  | -1.993515 |
| 1  | -1.836305 | 0.642510  | -1.736224 |
| 1  | -2.886187 | 0.701193  | -0.504000 |

|   |           |           |           |
|---|-----------|-----------|-----------|
| 7 | 1.519353  | -2.797858 | 0.849792  |
| 1 | 1.869952  | -3.750812 | 0.840088  |
| 1 | 0.997941  | -2.681715 | 1.714755  |
| 1 | 0.860826  | -2.695826 | 0.067982  |
| 7 | -0.280928 | -2.118028 | -1.591419 |
| 1 | -0.308202 | -2.776505 | -2.365069 |
| 1 | 0.367650  | -1.365356 | -1.852474 |
| 1 | -1.197660 | -1.671907 | -1.546721 |
| 7 | -2.480546 | 1.230194  | 1.663321  |
| 1 | -1.534290 | 1.470262  | 1.954648  |
| 1 | -2.553028 | 0.220982  | 1.802940  |
| 1 | -3.126173 | 1.680183  | 2.304753  |
| 7 | -2.253990 | -1.995224 | 0.986324  |
| 1 | -1.546321 | -2.645407 | 0.649140  |
| 1 | -2.570598 | -1.488353 | 0.156572  |
| 1 | -3.029597 | -2.547025 | 1.340066  |
| 7 | 1.439377  | 0.465986  | -1.997551 |
| 1 | 0.807060  | 1.225929  | -1.742220 |
| 1 | 1.912900  | 0.736321  | -2.853850 |
| 1 | 2.148047  | 0.374879  | -1.265937 |
| 7 | 3.416881  | -0.334337 | 0.407521  |
| 1 | 3.455967  | 0.111273  | 1.320536  |
| 1 | 4.375874  | -0.498637 | 0.116004  |
| 1 | 2.971396  | -1.248381 | 0.544349  |

-----

Cartesian coordinates of : AM10\_11

-----

Atomic number (AN) and Cartesian coordinates

| AN | X         | Y         | Z         |
|----|-----------|-----------|-----------|
| 7  | 0.373542  | 1.443876  | -1.662771 |
| 1  | 0.802409  | 1.834086  | -2.497572 |
| 1  | 0.472570  | 0.426224  | -1.724227 |
| 1  | -0.625066 | 1.669922  | -1.703883 |
| 7  | 0.760970  | -1.720630 | -1.420373 |
| 1  | 0.824955  | -2.288730 | -2.260860 |
| 1  | 1.702541  | -1.666507 | -1.019702 |
| 1  | 0.179133  | -2.236912 | -0.758306 |
| 7  | 2.961818  | 1.760883  | 0.218725  |
| 1  | 3.450779  | 2.648364  | 0.270326  |
| 1  | 2.580657  | 1.545450  | 1.138048  |
| 1  | 2.153227  | 1.873593  | -0.396207 |
| 7  | 3.658957  | -1.196775 | -0.217891 |
| 1  | 4.149217  | -1.512493 | 0.614380  |
| 1  | 3.602571  | -0.172165 | -0.165674 |
| 1  | 4.256976  | -1.430027 | -1.005595 |
| 7  | -2.374705 | -1.209002 | -1.325013 |
| 1  | -2.140508 | -2.072172 | -0.833869 |
| 1  | -1.490557 | -0.879850 | -1.712059 |
| 1  | -2.978617 | -1.447997 | -2.105949 |
| 7  | -2.631487 | 1.962799  | -1.022411 |
| 1  | -2.920924 | 0.985377  | -1.023116 |
| 1  | -3.429552 | 2.532812  | -1.281918 |
| 1  | -2.366580 | 2.200092  | -0.067469 |
| 7  | -2.207557 | -0.201733 | 1.696926  |
| 1  | -3.023861 | -0.169878 | 2.300713  |
| 1  | -1.792006 | 0.733349  | 1.702304  |
| 1  | -2.537342 | -0.366457 | 0.743871  |
| 7  | -1.042788 | -3.022087 | 0.984292  |
| 1  | -1.342351 | -2.158813 | 1.447774  |
| 1  | -0.143316 | -3.286095 | 1.377256  |
| 1  | -1.697286 | -3.754468 | 1.244331  |
| 7  | -0.467606 | 2.457733  | 1.309874  |
| 1  | -0.492012 | 3.444387  | 1.549074  |
| 1  | -0.073061 | 2.374682  | 0.370251  |
| 1  | 0.203724  | 2.002719  | 1.926324  |
| 7  | 0.990022  | -0.185564 | 1.451736  |
| 1  | 0.157447  | -0.542572 | 1.917031  |
| 1  | 1.665652  | -0.941841 | 1.367726  |
| 1  | 0.703019  | 0.029417  | 0.495349  |



-----  
 Cartesian coordinates of : AM10\_12  
 -----

Atomic number (AN) and Cartesian coordinates

| AN | X         | Y         | Z         |
|----|-----------|-----------|-----------|
| 7  | 2.631311  | -0.450579 | -2.118850 |
| 1  | 3.134067  | -0.115594 | -1.294027 |
| 1  | 3.292820  | -0.950348 | -2.705365 |
| 1  | 2.330017  | 0.366754  | -2.642936 |
| 7  | -2.649768 | 0.359616  | 1.473459  |
| 1  | -3.294581 | 0.356554  | 2.258440  |
| 1  | -1.696772 | 0.309039  | 1.850914  |
| 1  | -2.706454 | 1.279709  | 1.028762  |
| 7  | 1.472502  | -2.219965 | 0.351520  |
| 1  | 0.462352  | -2.405255 | 0.386192  |
| 1  | 1.939668  | -3.103507 | 0.536100  |
| 1  | 1.697429  | -1.952101 | -0.607738 |
| 7  | 0.415473  | 0.307704  | 2.071093  |
| 1  | 0.799388  | 1.110857  | 1.568609  |
| 1  | 0.861043  | -0.536031 | 1.707310  |
| 1  | 0.671972  | 0.396637  | 3.049416  |
| 7  | -1.648556 | -2.533696 | 0.384445  |
| 1  | -1.944449 | -2.459457 | -0.586700 |
| 1  | -2.053650 | -1.723071 | 0.856751  |
| 1  | -2.079667 | -3.366630 | 0.773815  |
| 7  | -0.401512 | 0.074693  | -1.183565 |
| 1  | 0.393852  | -0.434439 | -1.568507 |
| 1  | -1.252056 | -0.300761 | -1.606494 |
| 1  | -0.458462 | -0.174354 | -0.194735 |
| 7  | 1.591365  | 2.252564  | -0.135568 |
| 1  | 2.496400  | 1.787167  | -0.171839 |
| 1  | 0.942770  | 1.721013  | -0.720318 |
| 1  | 1.694806  | 3.178041  | -0.539558 |
| 7  | 3.637535  | 0.030991  | 0.852016  |
| 1  | 4.548939  | -0.376617 | 1.039206  |
| 1  | 3.452258  | 0.697107  | 1.597582  |
| 1  | 2.938088  | -0.712297 | 0.938569  |
| 7  | -1.695932 | 2.757750  | -0.228356 |
| 1  | -0.949039 | 3.018519  | 0.411645  |
| 1  | -1.923956 | 3.575899  | -0.783649 |
| 1  | -1.300420 | 2.044572  | -0.843607 |
| 7  | -3.451383 | -0.569762 | -1.443573 |
| 1  | -3.344990 | -0.346445 | -0.449488 |
| 1  | -4.214800 | -1.233242 | -1.534494 |
| 1  | -3.743829 | 0.283067  | -1.912201 |

-----  
 Cartesian coordinates of : AM10\_13  
 -----

Atomic number (AN) and Cartesian coordinates

| AN | X         | Y         | Z         |
|----|-----------|-----------|-----------|
| 7  | -0.245658 | -3.146401 | 0.159040  |
| 1  | -0.298856 | -2.647211 | 1.044378  |
| 1  | -0.212772 | -4.138422 | 0.374248  |
| 1  | 0.650899  | -2.891291 | -0.268659 |
| 7  | -0.090416 | 2.909217  | -1.368940 |
| 1  | 0.164821  | 2.570569  | -2.293340 |
| 1  | -1.003877 | 2.500937  | -1.141001 |
| 1  | -0.218958 | 3.913696  | -1.450566 |
| 7  | -2.855519 | -1.701458 | -0.972410 |
| 1  | -2.835284 | -1.746558 | -1.988163 |
| 1  | -3.674783 | -2.229055 | -0.683629 |
| 1  | -2.033411 | -2.218255 | -0.640595 |
| 7  | -2.746941 | 1.445745  | -0.382065 |
| 1  | -2.531326 | 1.454838  | 0.614576  |
| 1  | -2.975582 | 0.470279  | -0.597121 |
| 1  | -3.587100 | 1.998733  | -0.522314 |

|   |           |           |           |
|---|-----------|-----------|-----------|
| 7 | 2.695896  | 1.227682  | -0.926169 |
| 1 | 2.837676  | 0.830211  | 0.004361  |
| 1 | 2.069335  | 2.025884  | -0.820311 |
| 1 | 3.590080  | 1.579333  | -1.253884 |
| 7 | 2.530326  | -2.014137 | -0.968540 |
| 1 | 2.504041  | -1.110465 | -1.442584 |
| 1 | 3.164644  | -2.613175 | -1.488131 |
| 1 | 2.957205  | -1.813472 | -0.065176 |
| 7 | -0.064620 | -0.215565 | -0.840960 |
| 1 | -0.060894 | -1.124134 | -1.295945 |
| 1 | -0.898120 | 0.288636  | -1.134882 |
| 1 | 0.756249  | 0.296788  | -1.162240 |
| 7 | -1.537902 | -0.220407 | 1.916110  |
| 1 | -0.959575 | -0.303864 | 1.072816  |
| 1 | -0.995324 | -0.552162 | 2.708410  |
| 1 | -2.337254 | -0.836741 | 1.798822  |
| 7 | 0.412214  | 2.212062  | 1.768370  |
| 1 | 0.464799  | 3.114058  | 2.231095  |
| 1 | -0.473078 | 1.776406  | 2.023391  |
| 1 | 0.376379  | 2.387016  | 0.762899  |
| 7 | 1.989374  | -0.441622 | 1.644612  |
| 1 | 1.257258  | -0.720517 | 0.989782  |
| 1 | 1.681532  | 0.462967  | 2.012270  |
| 1 | 2.014010  | -1.110840 | 2.408168  |

-----

Cartesian coordinates of : AM10\_14

-----

Atomic number (AN) and Cartesian coordinates

| AN | X         | Y         | Z         |
|----|-----------|-----------|-----------|
| 7  | -1.591625 | 0.070860  | 1.788870  |
| 1  | -1.108176 | 0.829471  | 1.299298  |
| 1  | -2.588989 | 0.265518  | 1.705204  |
| 1  | -1.346438 | 0.130693  | 2.772542  |
| 7  | 1.822067  | 0.508465  | -1.700011 |
| 1  | 1.938328  | 0.408860  | -2.703655 |
| 1  | 2.748608  | 0.465259  | -1.279084 |
| 1  | 1.289277  | -0.297627 | -1.361164 |
| 7  | -4.070384 | 1.252282  | 0.259668  |
| 1  | -3.822735 | 2.127323  | 0.713130  |
| 1  | -3.380049 | 1.073677  | -0.476774 |
| 1  | -4.967560 | 1.401875  | -0.192633 |
| 7  | 3.258816  | -1.977238 | 0.074901  |
| 1  | 3.814257  | -2.617088 | 0.635279  |
| 1  | 3.198333  | -2.378176 | -0.857447 |
| 1  | 3.790671  | -1.107194 | -0.014497 |
| 7  | -0.331559 | 2.180328  | -0.238409 |
| 1  | -1.166079 | 1.941834  | -0.773524 |
| 1  | 0.463189  | 1.891274  | -0.818973 |
| 1  | -0.297383 | 3.190109  | -0.138222 |
| 7  | -3.452421 | -1.903627 | 0.138200  |
| 1  | -2.663611 | -1.849929 | 0.780227  |
| 1  | -4.051431 | -1.115282 | 0.381557  |
| 1  | -3.960200 | -2.761235 | 0.328166  |
| 7  | 0.066143  | -1.689954 | -0.260408 |
| 1  | -0.507791 | -2.456693 | -0.600697 |
| 1  | -0.442075 | -1.247250 | 0.510240  |
| 1  | 0.936194  | -2.076364 | 0.104987  |
| 7  | -2.049655 | 0.042220  | -1.810555 |
| 1  | -1.090925 | -0.204617 | -1.559768 |
| 1  | -2.606182 | -0.773568 | -1.541589 |
| 1  | -2.086185 | 0.129643  | -2.821882 |
| 7  | 4.468271  | 0.986611  | 0.144262  |
| 1  | 5.326093  | 0.927309  | 0.684771  |
| 1  | 3.686940  | 1.109886  | 0.799219  |
| 1  | 4.536848  | 1.828241  | -0.420701 |
| 7  | 1.848740  | 0.542302  | 1.596801  |
| 1  | 1.549015  | 0.501301  | 2.565964  |
| 1  | 1.927435  | -0.416834 | 1.259227  |
| 1  | 1.101874  | 0.993845  | 1.067559  |

-----  
 Cartesian coordinates of : AM10\_15  
 -----

Atomic number (AN) and Cartesian coordinates

| AN | X         | Y         | Z         |
|----|-----------|-----------|-----------|
| 7  | 3.709379  | -0.962711 | -0.696556 |
| 1  | 4.525690  | -1.239914 | -0.158010 |
| 1  | 3.726163  | 0.061447  | -0.768559 |
| 1  | 3.844528  | -1.334910 | -1.632870 |
| 7  | 3.087745  | 2.060940  | -0.460622 |
| 1  | 2.354978  | 2.418522  | -1.066668 |
| 1  | 3.688502  | 2.842612  | -0.218438 |
| 1  | 2.635162  | 1.722179  | 0.394302  |
| 7  | 1.936169  | 0.286291  | 1.791201  |
| 1  | 2.372469  | -0.467616 | 1.260762  |
| 1  | 2.358157  | 0.281401  | 2.715634  |
| 1  | 0.957149  | 0.014093  | 1.908012  |
| 7  | 0.970909  | -2.641011 | 0.067683  |
| 1  | 1.005093  | -3.655220 | 0.081599  |
| 1  | 0.435882  | -2.349441 | -0.746938 |
| 1  | 1.918712  | -2.291999 | -0.078611 |
| 7  | -2.768100 | 1.615100  | -1.341458 |
| 1  | -3.030114 | 2.335857  | -2.005319 |
| 1  | -2.686018 | 0.726340  | -1.838443 |
| 1  | -1.850067 | 1.846565  | -0.963993 |
| 7  | -0.500287 | 2.082081  | 0.852590  |
| 1  | 0.413219  | 2.293274  | 1.247015  |
| 1  | -1.134448 | 2.832247  | 1.111348  |
| 1  | -0.816956 | 1.225846  | 1.317068  |
| 7  | -1.010511 | -0.897076 | 1.861092  |
| 1  | -1.961711 | -0.841300 | 1.487272  |
| 1  | -1.087118 | -1.294812 | 2.793301  |
| 1  | -0.472783 | -1.563715 | 1.299649  |
| 7  | 0.569635  | 0.073703  | -1.364198 |
| 1  | 0.212644  | 0.785457  | -0.721911 |
| 1  | 1.490708  | -0.194398 | -1.019974 |
| 1  | 0.708919  | 0.527271  | -2.263395 |
| 7  | -2.185859 | -1.398393 | -1.586159 |
| 1  | -1.219549 | -1.069833 | -1.514778 |
| 1  | -2.186218 | -2.324872 | -1.999610 |
| 1  | -2.561560 | -1.470698 | -0.643034 |
| 7  | -3.939770 | -0.199077 | 0.838611  |
| 1  | -3.709814 | 0.576010  | 0.206156  |
| 1  | -4.330474 | 0.197623  | 1.688358  |
| 1  | -4.686313 | -0.726949 | 0.394784  |

-----  
 Cartesian coordinates of : AM10\_16  
 -----

Atomic number (AN) and Cartesian coordinates

| AN | X         | Y         | Z         |
|----|-----------|-----------|-----------|
| 7  | 2.387501  | -0.277950 | -1.569653 |
| 1  | 2.157899  | 0.715004  | -1.433368 |
| 1  | 2.853764  | -0.589960 | -0.720403 |
| 1  | 3.067165  | -0.331806 | -2.322808 |
| 7  | -2.593181 | -0.110171 | -1.398790 |
| 1  | -3.210055 | -0.075387 | -2.205448 |
| 1  | -3.085613 | -0.614959 | -0.664546 |
| 1  | -1.795406 | -0.702931 | -1.653413 |
| 7  | 1.653179  | 2.574666  | -0.686080 |
| 1  | 1.948051  | 2.377623  | 0.269188  |
| 1  | 0.636870  | 2.710449  | -0.680106 |
| 1  | 2.079940  | 3.451169  | -0.969150 |
| 7  | -1.476708 | 2.741986  | -0.513948 |
| 1  | -1.658687 | 2.723206  | 0.486524  |
| 1  | -1.858812 | 1.870582  | -0.893840 |
| 1  | -2.000630 | 3.516286  | -0.909671 |

|   |           |           |           |
|---|-----------|-----------|-----------|
| 7 | -0.144139 | -2.051892 | -1.843504 |
| 1 | 0.683779  | -1.442218 | -1.813942 |
| 1 | -0.052228 | -2.711079 | -1.074735 |
| 1 | -0.093761 | -2.590940 | -2.703334 |
| 7 | 3.067752  | 0.752898  | 1.675152  |
| 1 | 3.881848  | 1.067755  | 1.154566  |
| 1 | 3.246307  | 0.950823  | 2.655065  |
| 1 | 3.011928  | -0.263257 | 1.568305  |
| 7 | -2.118173 | -2.176392 | 0.930885  |
| 1 | -1.243121 | -1.650987 | 0.845006  |
| 1 | -2.232704 | -2.722436 | 0.081859  |
| 1 | -2.022296 | -2.827729 | 1.703769  |
| 7 | 0.026112  | 0.077198  | 0.715277  |
| 1 | 0.867202  | 0.548400  | 1.053542  |
| 1 | -0.038850 | 0.297212  | -0.278176 |
| 1 | -0.776201 | 0.530157  | 1.159312  |
| 7 | 2.128634  | -2.183499 | 0.933137  |
| 1 | 1.256388  | -1.652191 | 0.844920  |
| 1 | 2.012678  | -2.866028 | 1.675768  |
| 1 | 2.271932  | -2.695351 | 0.067311  |
| 7 | -2.939687 | 0.794122  | 1.718111  |
| 1 | -2.949184 | -0.223009 | 1.620293  |
| 1 | -3.391134 | 1.173755  | 0.890177  |
| 1 | -3.506090 | 1.041070  | 2.523233  |

-----

Cartesian coordinates of : AM10\_17

-----

Atomic number (AN) and Cartesian coordinates

| AN | X         | Y         | Z         |
|----|-----------|-----------|-----------|
| 7  | -3.222152 | -0.226660 | -1.299677 |
| 1  | -3.211206 | 0.704799  | -0.876107 |
| 1  | -4.123325 | -0.356052 | -1.749384 |
| 1  | -2.515052 | -0.191213 | -2.030655 |
| 7  | 2.171616  | -2.237827 | -1.624111 |
| 1  | 1.988047  | -2.291686 | -0.621560 |
| 1  | 2.988691  | -2.806742 | -1.823837 |
| 1  | 1.382619  | -2.674900 | -2.092787 |
| 7  | 0.994452  | -2.091791 | 1.437169  |
| 1  | 0.382778  | -2.642557 | 0.832324  |
| 1  | 0.359270  | -1.393325 | 1.833988  |
| 1  | 1.291531  | -2.697281 | 2.197541  |
| 7  | -1.467292 | -0.050449 | 1.875410  |
| 1  | -2.078304 | 0.074501  | 2.677677  |
| 1  | -2.054525 | 0.049099  | 1.046495  |
| 1  | -0.809709 | 0.737045  | 1.868790  |
| 7  | 3.006292  | 0.143853  | 0.288613  |
| 1  | 2.512207  | -0.593484 | 0.800197  |
| 1  | 3.939495  | 0.224313  | 0.682042  |
| 1  | 3.107297  | -0.219403 | -0.658779 |
| 7  | -0.010745 | 0.005239  | -0.933165 |
| 1  | 0.764531  | -0.350135 | -1.493222 |
| 1  | -0.567844 | -0.815899 | -0.688075 |
| 1  | 0.417820  | 0.308369  | -0.057302 |
| 7  | 0.794494  | 2.129548  | 1.646006  |
| 1  | 0.764409  | 2.774290  | 0.853710  |
| 1  | 1.645080  | 1.585348  | 1.494588  |
| 1  | 0.929209  | 2.677717  | 2.490584  |
| 7  | -2.023352 | 2.396313  | -0.275804 |
| 1  | -1.243925 | 1.838408  | -0.633606 |
| 1  | -1.775940 | 2.644412  | 0.678455  |
| 1  | -2.042332 | 3.261501  | -0.807893 |
| 7  | -1.827758 | -2.654528 | 0.117937  |
| 1  | -1.816489 | -2.343476 | 1.087971  |
| 1  | -2.242673 | -3.580828 | 0.088596  |
| 1  | -2.459871 | -2.010594 | -0.367136 |
| 7  | 1.508059  | 2.683845  | -1.260233 |
| 1  | 2.003251  | 3.255205  | -1.936571 |
| 1  | 0.826185  | 2.117299  | -1.759009 |
| 1  | 2.173487  | 2.032470  | -0.842049 |

-----  
 Cartesian coordinates of : AM10\_18  
 -----

Atomic number (AN) and Cartesian coordinates

| AN | X         | Y         | Z         |
|----|-----------|-----------|-----------|
| 7  | -0.829649 | -3.411821 | -0.219364 |
| 1  | -0.945940 | -4.102055 | 0.516366  |
| 1  | -1.017333 | -3.880574 | -1.100606 |
| 1  | 0.156893  | -3.128090 | -0.226696 |
| 7  | -0.191618 | 2.770494  | -0.410684 |
| 1  | -0.239533 | 3.778833  | -0.299221 |
| 1  | -1.085082 | 2.461084  | -0.799631 |
| 1  | -0.144056 | 2.360975  | 0.519608  |
| 7  | -3.455145 | -1.319783 | 0.052148  |
| 1  | -4.326825 | -1.837428 | 0.103674  |
| 1  | -3.333109 | -0.825493 | 0.938314  |
| 1  | -2.699183 | -2.001731 | -0.032457 |
| 7  | -3.066299 | 1.401209  | -1.352943 |
| 1  | -3.877709 | 2.005034  | -1.253317 |
| 1  | -3.344459 | 0.460494  | -1.041848 |
| 1  | -2.874168 | 1.339577  | -2.349428 |
| 7  | 2.058810  | 0.837969  | -1.691654 |
| 1  | 2.973792  | 0.905620  | -1.240551 |
| 1  | 1.489947  | 1.636457  | -1.397642 |
| 1  | 2.205816  | 0.927816  | -2.692461 |
| 7  | 2.017595  | -2.059307 | -0.183776 |
| 1  | 2.045050  | -1.302564 | -0.871766 |
| 1  | 2.841414  | -2.635780 | -0.327844 |
| 1  | 2.122165  | -1.600345 | 0.719889  |
| 7  | 1.847555  | 0.690863  | 1.739953  |
| 1  | 0.980614  | 0.371044  | 1.293295  |
| 1  | 1.667953  | 0.814339  | 2.731872  |
| 1  | 2.051817  | 1.609205  | 1.352108  |
| 7  | -0.471119 | -0.211380 | -0.080817 |
| 1  | -0.668310 | -1.211066 | -0.066037 |
| 1  | -1.304306 | 0.242519  | -0.451888 |
| 1  | 0.269941  | -0.064611 | -0.769193 |
| 7  | 4.534454  | 0.271129  | 0.170907  |
| 1  | 3.786741  | 0.154398  | 0.857905  |
| 1  | 5.306797  | 0.752277  | 0.620435  |
| 1  | 4.865817  | -0.651043 | -0.093569 |
| 7  | -2.477731 | 0.984759  | 1.925721  |
| 1  | -2.638817 | 1.615837  | 1.143171  |
| 1  | -1.545091 | 0.597852  | 1.789214  |
| 1  | -2.488794 | 1.528491  | 2.781866  |

-----  
 Cartesian coordinates of : AM10\_19  
 -----

Atomic number (AN) and Cartesian coordinates

| AN | X         | Y         | Z         |
|----|-----------|-----------|-----------|
| 7  | -1.232696 | 2.057254  | 0.156876  |
| 1  | -2.045587 | 1.670295  | 0.640235  |
| 1  | -1.269599 | 3.064598  | 0.290763  |
| 1  | -0.399028 | 1.732958  | 0.651272  |
| 7  | 1.514990  | 1.236728  | 1.803829  |
| 1  | 2.402060  | 0.946236  | 1.385806  |
| 1  | 1.085337  | 0.368336  | 2.120634  |
| 1  | 1.718472  | 1.796515  | 2.626629  |
| 7  | 3.597664  | 0.182027  | -0.370209 |
| 1  | 3.276257  | 1.054276  | -0.795553 |
| 1  | 3.238083  | -0.559720 | -0.968778 |
| 1  | 4.610981  | 0.161136  | -0.428775 |
| 7  | -1.543118 | -1.399901 | 0.870228  |
| 1  | -0.573852 | -1.312245 | 1.183223  |
| 1  | -1.951563 | -2.150900 | 1.421094  |
| 1  | -2.048036 | -0.550188 | 1.124159  |

|   |           |           |           |
|---|-----------|-----------|-----------|
| 7 | 0.293206  | -3.325687 | -0.894565 |
| 1 | 0.151019  | -4.172433 | -1.434384 |
| 1 | 0.733407  | -2.623930 | -1.489188 |
| 1 | -0.617266 | -2.944387 | -0.641304 |
| 7 | 1.681873  | 2.728441  | -1.014296 |
| 1 | 2.107820  | 3.646620  | -1.093860 |
| 1 | 0.750422  | 2.787128  | -1.420505 |
| 1 | 1.541262  | 2.520675  | -0.024340 |
| 7 | 0.839989  | -0.364299 | -1.323483 |
| 1 | 0.905760  | -0.368914 | -0.305141 |
| 1 | 1.192403  | 0.547106  | -1.612648 |
| 1 | -0.158078 | -0.355659 | -1.524806 |
| 7 | 1.605491  | -1.845661 | 1.459255  |
| 1 | 1.865495  | -2.297307 | 2.331363  |
| 1 | 1.348690  | -2.581945 | 0.793390  |
| 1 | 2.441968  | -1.385740 | 1.098567  |
| 7 | -4.038587 | 0.662312  | 0.918985  |
| 1 | -4.599617 | 1.503698  | 1.014786  |
| 1 | -4.555464 | -0.084084 | 1.374771  |
| 1 | -3.978890 | 0.436625  | -0.079068 |
| 7 | -2.721148 | -0.018750 | -1.718761 |
| 1 | -2.126736 | 0.788826  | -1.525595 |
| 1 | -2.708310 | -0.214805 | -2.713406 |
| 1 | -2.321056 | -0.810030 | -1.214356 |

-----

Cartesian coordinates of : AM10\_20

-----

Atomic number (AN) and Cartesian coordinates

| AN | X         | Y         | Z         |
|----|-----------|-----------|-----------|
| 7  | -3.243929 | -0.819167 | 0.118113  |
| 1  | -2.801578 | -0.447817 | -0.729933 |
| 1  | -3.007762 | -1.807574 | 0.157263  |
| 1  | -4.249215 | -0.760471 | -0.016950 |
| 7  | -2.067158 | 1.417507  | 2.035016  |
| 1  | -2.795382 | 1.905407  | 2.547513  |
| 1  | -1.477828 | 0.952644  | 2.720387  |
| 1  | -2.515563 | 0.686590  | 1.473926  |
| 7  | -1.840488 | 0.403576  | -2.427152 |
| 1  | -1.079565 | -0.038275 | -2.936275 |
| 1  | -1.433027 | 1.166031  | -1.870331 |
| 1  | -2.453968 | 0.826007  | -3.117904 |
| 7  | -0.723178 | 2.626034  | -0.567830 |
| 1  | 0.275826  | 2.572987  | -0.384499 |
| 1  | -1.179372 | 2.358847  | 0.309676  |
| 1  | -0.952181 | 3.597206  | -0.756315 |
| 7  | 2.461039  | -1.685299 | 0.750774  |
| 1  | 1.667671  | -1.672568 | 1.389235  |
| 1  | 2.069041  | -1.561151 | -0.182225 |
| 1  | 2.869780  | -2.613996 | 0.788376  |
| 7  | 1.397610  | 0.190262  | -1.636514 |
| 1  | 1.179074  | 0.582890  | -0.715953 |
| 1  | 2.413458  | 0.260903  | -1.718731 |
| 1  | 1.003765  | 0.833509  | -2.318768 |
| 7  | 1.148968  | 1.047350  | 1.420138  |
| 1  | 2.036958  | 0.777582  | 1.835887  |
| 1  | 0.509875  | 0.261453  | 1.570652  |
| 1  | 0.778180  | 1.834691  | 1.945256  |
| 7  | -0.524812 | -2.276834 | -1.247836 |
| 1  | -0.196834 | -3.153301 | -1.642218 |
| 1  | 0.161320  | -1.550271 | -1.480264 |
| 1  | -1.381339 | -2.021797 | -1.733512 |
| 7  | -0.634575 | -1.620906 | 1.789224  |
| 1  | -1.583131 | -1.276853 | 1.922148  |
| 1  | -0.519201 | -2.417397 | 2.410080  |
| 1  | -0.601928 | -1.968127 | 0.822500  |
| 7  | 4.128352  | 0.751207  | -0.298697 |
| 1  | 3.792217  | -0.030319 | 0.267964  |
| 1  | 3.639935  | 1.584935  | 0.015059  |
| 1  | 5.117973  | 0.882126  | -0.118688 |

-----  
Cartesian coordinates of : AM10\_21  
-----

Atomic number (AN) and Cartesian coordinates

| AN | X         | Y         | Z         |
|----|-----------|-----------|-----------|
| 7  | 0.020332  | -2.105415 | 1.456252  |
| 1  | -0.778265 | -2.161301 | 0.818087  |
| 1  | 0.837943  | -2.495861 | 0.978147  |
| 1  | -0.185352 | -2.721562 | 2.238160  |
| 7  | -0.260666 | 2.794263  | 1.735637  |
| 1  | -0.130723 | 3.377146  | 2.556761  |
| 1  | -0.216806 | 3.404887  | 0.924836  |
| 1  | 0.530171  | 2.148445  | 1.677189  |
| 7  | -2.756657 | -1.692212 | -0.130309 |
| 1  | -3.044088 | -1.258949 | -1.010355 |
| 1  | -2.919293 | -1.019566 | 0.623841  |
| 1  | -3.359392 | -2.493526 | 0.028700  |
| 7  | -2.071574 | 0.225946  | 2.283443  |
| 1  | -2.448569 | 0.127353  | 3.221259  |
| 1  | -1.745857 | 1.188430  | 2.182332  |
| 1  | -1.241639 | -0.366187 | 2.218284  |
| 7  | 1.916616  | 0.431439  | 1.243904  |
| 1  | 1.329581  | -0.343018 | 1.572942  |
| 1  | 2.312950  | 0.120597  | 0.354959  |
| 1  | 2.688228  | 0.527914  | 1.898158  |
| 7  | -2.811789 | 0.053089  | -2.814431 |
| 1  | -3.459805 | 0.808288  | -3.013742 |
| 1  | -1.936169 | 0.466517  | -2.495439 |
| 1  | -2.629957 | -0.427163 | -3.689800 |
| 7  | -0.693330 | 0.605583  | -0.619569 |
| 1  | -1.452707 | 1.129116  | -0.183166 |
| 1  | 0.071533  | 0.668337  | 0.053324  |
| 1  | -1.006709 | -0.366663 | -0.571786 |
| 7  | 2.113100  | -0.287815 | -1.957057 |
| 1  | 2.398569  | 0.692930  | -1.993460 |
| 1  | 2.396449  | -0.721170 | -2.831396 |
| 1  | 1.093605  | -0.259399 | -1.949067 |
| 7  | 2.733248  | -2.706385 | -0.000023 |
| 1  | 2.657969  | -1.921447 | -0.652137 |
| 1  | 2.941944  | -3.542471 | -0.536562 |
| 1  | 3.530317  | -2.532134 | 0.604315  |
| 7  | 1.715416  | 2.624491  | -1.204324 |
| 1  | 1.776492  | 3.625516  | -1.354271 |
| 1  | 1.891441  | 2.429585  | -0.221218 |
| 1  | 0.765264  | 2.314473  | -1.403566 |

-----  
Cartesian coordinates of : AM10\_22  
-----

Atomic number (AN) and Cartesian coordinates

| AN | X         | Y         | Z         |
|----|-----------|-----------|-----------|
| 7  | -2.635465 | -2.301884 | -0.503008 |
| 1  | -3.180350 | -3.103907 | -0.201552 |
| 1  | -1.866365 | -2.657032 | -1.064394 |
| 1  | -2.230490 | -1.856463 | 0.329099  |
| 7  | 0.989061  | -1.750046 | 0.035162  |
| 1  | 0.667338  | -2.696909 | 0.213469  |
| 1  | 0.316528  | -1.303540 | -0.593863 |
| 1  | 1.888191  | -1.803831 | -0.453955 |
| 7  | -4.168390 | 0.468185  | -0.452230 |
| 1  | -4.785475 | 0.621665  | -1.244850 |
| 1  | -4.763930 | 0.417296  | 0.369857  |
| 1  | -3.750661 | -0.459798 | -0.570283 |
| 7  | -0.934330 | 0.009297  | -1.803585 |
| 1  | -1.091910 | 0.980047  | -1.527609 |
| 1  | -1.846172 | -0.441188 | -1.848017 |
| 1  | -0.542284 | 0.010765  | -2.740288 |

|   |           |           |           |
|---|-----------|-----------|-----------|
| 7 | 1.175175  | -0.540207 | 2.908423  |
| 1 | 2.056295  | -0.054438 | 3.049401  |
| 1 | 1.222826  | -1.008439 | 1.995112  |
| 1 | 1.117906  | -1.258082 | 3.624425  |
| 7 | -1.636686 | -0.212578 | 1.479795  |
| 1 | -0.885212 | -0.189920 | 2.171425  |
| 1 | -2.370404 | 0.419440  | 1.787918  |
| 1 | -1.246237 | 0.185673  | 0.625888  |
| 7 | 4.132417  | 1.610532  | -0.531135 |
| 1 | 4.253118  | 2.286447  | -1.279177 |
| 1 | 3.190028  | 1.738215  | -0.145292 |
| 1 | 4.799409  | 1.854986  | 0.194360  |
| 7 | -1.886735 | 2.615876  | -0.297117 |
| 1 | -1.691124 | 2.846435  | 0.673396  |
| 1 | -2.121931 | 3.485158  | -0.766745 |
| 1 | -2.719176 | 2.015346  | -0.309968 |
| 7 | 3.826854  | -1.426438 | -1.295573 |
| 1 | 3.927244  | -1.536111 | -2.300031 |
| 1 | 4.575758  | -1.961634 | -0.866629 |
| 1 | 3.993083  | -0.438362 | -1.076102 |
| 7 | 1.211746  | 1.507898  | 0.493969  |
| 1 | 0.944569  | 1.573696  | 1.474137  |
| 1 | 1.156713  | 0.512814  | 0.274488  |
| 1 | 0.467197  | 1.957225  | -0.037118 |

-----

Cartesian coordinates of : AM10\_23

-----

Atomic number (AN) and Cartesian coordinates

| AN | X         | Y         | Z         |
|----|-----------|-----------|-----------|
| 7  | 0.204798  | -0.581418 | -2.163110 |
| 1  | 1.102047  | -0.945930 | -1.841312 |
| 1  | 0.230541  | -0.570972 | -3.178411 |
| 1  | 0.146120  | 0.388905  | -1.846941 |
| 7  | -0.116886 | 2.304920  | -0.661231 |
| 1  | -0.489275 | 3.163667  | -1.055243 |
| 1  | 0.455639  | 2.567217  | 0.141543  |
| 1  | -0.909900 | 1.750231  | -0.318334 |
| 7  | 3.087542  | -1.613468 | -0.658536 |
| 1  | 3.350369  | -1.828135 | 0.300285  |
| 1  | 3.145672  | -0.592956 | -0.755988 |
| 1  | 3.802273  | -2.020002 | -1.255112 |
| 7  | 2.880248  | 1.513215  | -0.900716 |
| 1  | 2.804292  | 2.021803  | -0.017328 |
| 1  | 2.028890  | 1.746105  | -1.411791 |
| 1  | 3.667225  | 1.900169  | -1.412952 |
| 7  | -2.214670 | 0.069115  | -0.066266 |
| 1  | -1.804353 | -0.439744 | -0.849429 |
| 1  | -2.288369 | -0.589859 | 0.712326  |
| 1  | -3.158351 | 0.353995  | -0.329747 |
| 7  | 1.917998  | 2.472651  | 2.039419  |
| 1  | 1.259084  | 3.067436  | 2.533492  |
| 1  | 1.572115  | 1.509106  | 2.096429  |
| 1  | 2.791986  | 2.519077  | 2.555129  |
| 7  | 0.797466  | -0.180597 | 1.105139  |
| 1  | -0.175335 | 0.053670  | 0.898025  |
| 1  | 0.843335  | -1.196649 | 1.045925  |
| 1  | 1.336633  | 0.158388  | 0.308497  |
| 7  | -1.482551 | -1.998540 | 2.220778  |
| 1  | -0.853404 | -1.454504 | 2.804995  |
| 1  | -0.907507 | -2.525136 | 1.558088  |
| 1  | -1.962060 | -2.660326 | 2.822047  |
| 7  | 0.200854  | -3.083083 | -0.247326 |
| 1  | -0.315351 | -2.480982 | -0.889981 |
| 1  | -0.001004 | -4.047054 | -0.494820 |
| 1  | 1.184205  | -2.905324 | -0.458894 |
| 7  | -5.272720 | 1.041148  | -0.633094 |
| 1  | -5.885059 | 0.316776  | -0.272604 |
| 1  | -5.581341 | 1.265185  | -1.573196 |
| 1  | -5.403675 | 1.868244  | -0.060103 |



-----  
Cartesian coordinates of : AM10\_24  
-----

Atomic number (AN) and Cartesian coordinates

| AN | X         | Y         | Z         |
|----|-----------|-----------|-----------|
| 7  | 0.501457  | 1.688830  | -0.037892 |
| 1  | -0.419257 | 2.028220  | -0.325096 |
| 1  | 1.200262  | 2.367287  | -0.330207 |
| 1  | 0.697441  | 0.832623  | -0.556723 |
| 7  | -1.809413 | -0.570294 | -0.387043 |
| 1  | -1.846746 | 0.388356  | -0.731103 |
| 1  | -1.381758 | -1.141606 | -1.119618 |
| 1  | -1.160291 | -0.560340 | 0.398434  |
| 7  | -2.542444 | 2.653006  | -0.666541 |
| 1  | -2.506889 | 3.499561  | -0.105641 |
| 1  | -3.334543 | 2.097076  | -0.325114 |
| 1  | -2.766652 | 2.942117  | -1.614385 |
| 7  | -4.604815 | 0.494829  | 0.275361  |
| 1  | -4.917889 | 0.425130  | 1.238382  |
| 1  | -3.833821 | -0.166951 | 0.142783  |
| 1  | -5.378104 | 0.197267  | -0.311017 |
| 7  | 0.310267  | -0.292349 | 2.357730  |
| 1  | 0.314120  | 0.516929  | 1.727466  |
| 1  | -0.235555 | -0.043289 | 3.177519  |
| 1  | 1.274358  | -0.411710 | 2.661596  |
| 7  | 2.108085  | -1.165497 | -0.200633 |
| 1  | 2.751599  | -1.939249 | -0.349492 |
| 1  | 2.499402  | -0.591956 | 0.552325  |
| 1  | 1.248960  | -1.585916 | 0.156654  |
| 7  | 0.025064  | -2.431355 | -2.164587 |
| 1  | 0.054118  | -3.082774 | -2.941162 |
| 1  | 0.057724  | -2.954560 | -1.288924 |
| 1  | 0.860957  | -1.853485 | -2.193648 |
| 7  | -0.477578 | -3.013448 | 0.929716  |
| 1  | -0.275651 | -2.251006 | 1.583054  |
| 1  | -1.455764 | -2.916265 | 0.665979  |
| 1  | -0.379431 | -3.890793 | 1.430835  |
| 7  | 3.268518  | 1.368170  | -1.650559 |
| 1  | 4.183542  | 1.174681  | -2.046349 |
| 1  | 2.737042  | 1.857147  | -2.364755 |
| 1  | 2.807440  | 0.471293  | -1.476869 |
| 7  | 3.165569  | 1.236296  | 1.522971  |
| 1  | 3.423371  | 1.542133  | 0.582119  |
| 1  | 3.875892  | 1.561989  | 2.170449  |
| 1  | 2.293145  | 1.710777  | 1.742843  |

-----  
Cartesian coordinates of : AM10\_25  
-----

Atomic number (AN) and Cartesian coordinates

| AN | X         | Y         | Z         |
|----|-----------|-----------|-----------|
| 7  | 0.648529  | 2.671004  | 0.171886  |
| 1  | 0.653742  | 3.686801  | 0.158244  |
| 1  | 1.581399  | 2.366310  | 0.460921  |
| 1  | 0.557072  | 2.355500  | -0.792525 |
| 7  | 3.075770  | -1.598647 | 0.433565  |
| 1  | 3.666055  | -2.311006 | 0.851993  |
| 1  | 2.165674  | -1.626857 | 0.902045  |
| 1  | 2.898868  | -1.876367 | -0.529030 |
| 7  | -1.750293 | 1.201183  | 1.565573  |
| 1  | -1.926370 | 1.434232  | 2.538647  |
| 1  | -2.594207 | 1.437736  | 1.039030  |
| 1  | -0.991295 | 1.808357  | 1.234103  |
| 7  | 0.199288  | -1.481587 | 1.811660  |
| 1  | -0.603750 | -2.095545 | 1.667679  |
| 1  | -0.195479 | -0.539422 | 1.776373  |
| 1  | 0.532607  | -1.627125 | 2.760745  |

|   |           |           |           |
|---|-----------|-----------|-----------|
| 7 | 3.566361  | 1.417186  | 0.770202  |
| 1 | 4.410052  | 1.743652  | 0.308088  |
| 1 | 3.546434  | 0.392214  | 0.697973  |
| 1 | 3.666107  | 1.649053  | 1.754463  |
| 7 | 1.826159  | 0.579541  | -2.004310 |
| 1 | 2.326680  | 0.850643  | -1.158301 |
| 1 | 2.421653  | 0.806289  | -2.794601 |
| 1 | 1.711199  | -0.435623 | -1.974031 |
| 7 | -1.286715 | 0.352373  | -1.469747 |
| 1 | -1.096116 | 0.338732  | -0.465881 |
| 1 | -0.370936 | 0.469256  | -1.911319 |
| 1 | -1.781476 | 1.228241  | -1.627476 |
| 7 | -2.528670 | -1.856700 | 0.547718  |
| 1 | -2.355196 | -1.678717 | -0.439237 |
| 1 | -3.447567 | -2.276215 | 0.641504  |
| 1 | -2.529762 | -0.945875 | 1.009564  |
| 7 | 0.524472  | -2.187729 | -1.408986 |
| 1 | 0.391701  | -2.025892 | -0.408837 |
| 1 | 0.531849  | -3.194180 | -1.545934 |
| 1 | -0.308544 | -1.824845 | -1.868919 |
| 7 | -4.217155 | 0.881513  | -0.450006 |
| 1 | -3.633314 | 0.266433  | -1.014290 |
| 1 | -4.741396 | 1.479736  | -1.081143 |
| 1 | -4.889905 | 0.297523  | 0.037264  |

-----

Cartesian coordinates of : AM10\_26

-----

Atomic number (AN) and Cartesian coordinates

| AN | X         | Y         | Z         |
|----|-----------|-----------|-----------|
| 7  | 1.436235  | -3.014290 | 0.512308  |
| 1  | 2.160952  | -2.509134 | -0.004290 |
| 1  | 1.471502  | -2.675233 | 1.469767  |
| 1  | 1.682751  | -3.998880 | 0.525435  |
| 7  | -2.684485 | 0.261238  | -0.275709 |
| 1  | -3.697855 | 0.278234  | -0.386668 |
| 1  | -2.341976 | 1.218151  | -0.283990 |
| 1  | -2.450611 | -0.125826 | 0.637586  |
| 7  | 2.974553  | -0.989025 | -1.345455 |
| 1  | 3.473326  | -0.096202 | -1.300648 |
| 1  | 2.013208  | -0.780868 | -1.625504 |
| 1  | 3.396183  | -1.537704 | -2.089206 |
| 7  | -0.216123 | -1.168410 | -1.514826 |
| 1  | -0.348934 | -1.662984 | -2.392618 |
| 1  | -1.133255 | -0.807814 | -1.231190 |
| 1  | 0.084873  | -1.861259 | -0.825798 |
| 7  | -0.854199 | -1.123115 | 1.999437  |
| 1  | -0.952052 | -1.912930 | 1.364552  |
| 1  | 0.118725  | -0.808089 | 1.902507  |
| 1  | -0.968414 | -1.487463 | 2.941129  |
| 7  | 3.736103  | 1.981338  | -0.807480 |
| 1  | 4.106266  | 2.685230  | -1.438250 |
| 1  | 2.716183  | 2.084896  | -0.776163 |
| 1  | 4.100110  | 2.186513  | 0.117706  |
| 7  | -1.007226 | 2.046150  | 1.847651  |
| 1  | -0.350303 | 2.372478  | 2.550318  |
| 1  | -1.100236 | 1.034019  | 1.959179  |
| 1  | -1.907877 | 2.461833  | 2.065640  |
| 7  | 0.591422  | 1.870156  | -0.862617 |
| 1  | 0.355970  | 2.489453  | -1.633144 |
| 1  | 0.364899  | 0.918430  | -1.166521 |
| 1  | -0.035435 | 2.097700  | -0.086324 |
| 7  | 1.947234  | 0.104195  | 1.443127  |
| 1  | 2.492865  | -0.426168 | 0.761321  |
| 1  | 2.596437  | 0.442069  | 2.147890  |
| 1  | 1.603415  | 0.917112  | 0.930893  |
| 7  | -5.799312 | 0.003180  | -1.058436 |
| 1  | -6.314125 | 0.809329  | -1.396797 |
| 1  | -6.416082 | -0.518782 | -0.444779 |
| 1  | -5.589920 | -0.586039 | -1.858044 |

-----  
Cartesian coordinates of : AM10\_27  
-----

Atomic number (AN) and Cartesian coordinates

| AN | X         | Y         | Z         |
|----|-----------|-----------|-----------|
| 7  | -0.462693 | 1.195175  | 1.640652  |
| 1  | 0.072546  | 0.354818  | 1.869099  |
| 1  | 0.224285  | 1.875888  | 1.314675  |
| 1  | -0.864202 | 1.552149  | 2.502597  |
| 7  | -0.848067 | -2.525479 | 0.441866  |
| 1  | -0.343256 | -2.007082 | 1.160674  |
| 1  | -1.344253 | -3.279809 | 0.906953  |
| 1  | -1.550716 | -1.883228 | 0.060211  |
| 7  | 1.832362  | -0.984921 | 1.684140  |
| 1  | 2.449015  | -0.221657 | 1.408170  |
| 1  | 2.027417  | -1.744623 | 1.022146  |
| 1  | 2.137374  | -1.295254 | 2.602529  |
| 7  | 2.001624  | -2.918680 | -0.737364 |
| 1  | 2.058243  | -2.262915 | -1.512793 |
| 1  | 1.003101  | -3.036467 | -0.536471 |
| 1  | 2.375866  | -3.809306 | -1.047833 |
| 7  | -2.554337 | -0.061994 | -0.446580 |
| 1  | -1.985486 | 0.427316  | 0.248939  |
| 1  | -2.330189 | 0.345930  | -1.349836 |
| 1  | -3.540389 | 0.117303  | -0.258000 |
| 7  | 3.546467  | 0.154769  | -0.729700 |
| 1  | 2.643557  | -0.018524 | -1.188329 |
| 1  | 4.199352  | 0.489609  | -1.432148 |
| 1  | 3.887099  | -0.750896 | -0.415166 |
| 7  | 0.598251  | -0.230855 | -1.347826 |
| 1  | -0.040128 | -0.937971 | -1.706864 |
| 1  | 0.212592  | 0.679952  | -1.608710 |
| 1  | 0.497016  | -0.286094 | -0.333075 |
| 7  | 2.228802  | 2.716481  | 0.568247  |
| 1  | 2.645125  | 3.507646  | 0.083895  |
| 1  | 2.707927  | 1.877581  | 0.223322  |
| 1  | 2.482926  | 2.821201  | 1.547238  |
| 7  | -0.533688 | 2.689491  | -1.203177 |
| 1  | -1.272136 | 2.469149  | -0.539655 |
| 1  | -0.790344 | 3.540617  | -1.692146 |
| 1  | 0.306578  | 2.873055  | -0.653756 |
| 7  | -5.752109 | -0.120923 | 0.012343  |
| 1  | -6.062852 | -0.088858 | 0.977594  |
| 1  | -5.774185 | -1.090876 | -0.286015 |
| 1  | -6.428171 | 0.389908  | -0.545453 |

-----  
Cartesian coordinates of : AM10\_28  
-----

Atomic number (AN) and Cartesian coordinates

| AN | X         | Y        | Z         |
|----|-----------|----------|-----------|
| 7  | 2.991877  | 1.326635 | 1.137992  |
| 1  | 3.452267  | 0.608147 | 0.570499  |
| 1  | 3.657286  | 1.657905 | 1.829438  |
| 1  | 2.240401  | 0.849174 | 1.634269  |
| 7  | -2.599436 | 0.406035 | -0.832643 |
| 1  | -3.604777 | 0.434505 | -0.654497 |
| 1  | -2.134381 | 1.005312 | -0.142282 |
| 1  | -2.450008 | 0.830065 | -1.744169 |
| 7  | 1.590452  | 3.115198 | -0.921728 |
| 1  | 1.484569  | 4.084682 | -0.637748 |
| 1  | 2.098837  | 3.124667 | -1.801412 |
| 1  | 2.180597  | 2.642431 | -0.224164 |
| 7  | -0.647137 | 1.841036 | 1.129056  |
| 1  | -0.727874 | 2.492209 | 1.903930  |
| 1  | -0.064424 | 2.283662 | 0.416987  |
| 1  | -0.131254 | 1.026600 | 1.463815  |

|   |           |           |           |
|---|-----------|-----------|-----------|
| 7 | -1.794323 | -2.272771 | 0.481592  |
| 1 | -2.078748 | -3.073899 | -0.076128 |
| 1 | -2.038987 | -1.432648 | -0.059766 |
| 1 | -2.395383 | -2.272798 | 1.301826  |
| 7 | 0.874772  | -1.051358 | 1.833231  |
| 1 | -0.004509 | -1.482083 | 1.534836  |
| 1 | 0.962824  | -1.203930 | 2.834248  |
| 1 | 1.603827  | -1.606284 | 1.383249  |
| 7 | 1.238923  | -2.951303 | -0.629956 |
| 1 | 1.117648  | -2.176770 | -1.284181 |
| 1 | 1.365181  | -3.802823 | -1.168070 |
| 1 | 0.357640  | -3.030044 | -0.123255 |
| 7 | 0.671306  | 0.032865  | -1.222047 |
| 1 | 0.951136  | -0.040178 | -0.242432 |
| 1 | -0.322693 | -0.197872 | -1.230451 |
| 1 | 0.730413  | 1.028978  | -1.437080 |
| 7 | 3.646420  | -0.938208 | -0.886444 |
| 1 | 2.913787  | -0.575704 | -1.496291 |
| 1 | 3.306914  | -1.843394 | -0.565152 |
| 1 | 4.482597  | -1.091073 | -1.440398 |
| 7 | -5.770347 | 0.511111  | -0.147821 |
| 1 | -5.863693 | 1.092746  | 0.678627  |
| 1 | -6.172189 | -0.395397 | 0.067551  |
| 1 | -6.334550 | 0.929137  | -0.880429 |

-----

Cartesian coordinates of : AM10\_29

-----

Atomic number (AN) and Cartesian coordinates

| AN | X         | Y         | Z         |
|----|-----------|-----------|-----------|
| 7  | -1.843644 | 2.851842  | 0.036840  |
| 1  | -1.691057 | 2.068283  | 0.682724  |
| 1  | -1.309840 | 3.648034  | 0.372345  |
| 1  | -2.824844 | 3.111252  | 0.084763  |
| 7  | -4.313954 | 0.302918  | 0.511874  |
| 1  | -3.895287 | 0.919755  | 1.201845  |
| 1  | -5.257503 | 0.629690  | 0.331272  |
| 1  | -3.767990 | 0.395341  | -0.349945 |
| 7  | -1.438224 | 0.125133  | 1.507332  |
| 1  | -0.465778 | -0.132976 | 1.694148  |
| 1  | -1.729121 | -0.414432 | 0.691719  |
| 1  | -1.991470 | -0.235752 | 2.280787  |
| 7  | -3.024107 | -2.373748 | -0.339907 |
| 1  | -3.134050 | -1.903191 | -1.236127 |
| 1  | -3.612118 | -1.842662 | 0.304051  |
| 1  | -3.413144 | -3.307663 | -0.423772 |
| 7  | -2.161871 | 0.364098  | -1.835416 |
| 1  | -1.905990 | 1.295803  | -1.500028 |
| 1  | -1.368141 | -0.251967 | -1.646887 |
| 1  | -2.266859 | 0.424018  | -2.843952 |
| 7  | 1.005432  | 1.329321  | -0.586599 |
| 1  | 0.886236  | 1.357878  | 0.424157  |
| 1  | 0.391032  | 2.049781  | -0.958987 |
| 1  | 0.600614  | 0.433965  | -0.866294 |
| 7  | 6.528534  | 0.340726  | -0.298252 |
| 1  | 6.853666  | 0.302929  | 0.662235  |
| 1  | 7.204385  | -0.155009 | -0.870129 |
| 1  | 6.538005  | 1.313507  | -0.587518 |
| 7  | 3.426306  | -0.567034 | -0.450354 |
| 1  | 4.421269  | -0.340945 | -0.423424 |
| 1  | 3.291929  | -1.251292 | -1.188728 |
| 1  | 2.909332  | 0.271762  | -0.723734 |
| 7  | 0.035214  | -1.745360 | -0.641894 |
| 1  | 0.550681  | -1.568422 | 0.220118  |
| 1  | 0.576396  | -2.411383 | -1.184717 |
| 1  | -0.852298 | -2.190817 | -0.390529 |
| 7  | 1.671171  | -0.649331 | 2.049720  |
| 1  | 2.378158  | -0.718494 | 1.304136  |
| 1  | 1.751765  | -1.481567 | 2.627521  |
| 1  | 1.938038  | 0.134623  | 2.639543  |

-----  
Cartesian coordinates of : AM10\_30  
-----

Atomic number (AN) and Cartesian coordinates

| AN | X         | Y         | Z         |
|----|-----------|-----------|-----------|
| 7  | 5.142723  | 0.622204  | -0.322323 |
| 1  | 5.004195  | -0.391196 | -0.316962 |
| 1  | 5.626539  | 0.868125  | -1.180026 |
| 1  | 5.760954  | 0.859813  | 0.446641  |
| 7  | 0.081773  | -1.892329 | 0.625531  |
| 1  | -0.568579 | -1.418248 | 1.251556  |
| 1  | 0.589275  | -2.584634 | 1.167798  |
| 1  | 0.756613  | -1.198811 | 0.296710  |
| 7  | -4.305774 | 0.740979  | -0.767586 |
| 1  | -3.409491 | 0.675208  | -1.255367 |
| 1  | -4.720279 | -0.187086 | -0.776852 |
| 1  | -4.915061 | 1.356131  | -1.296361 |
| 7  | -0.070436 | 1.365453  | 2.069359  |
| 1  | 0.600101  | 0.744359  | 2.516262  |
| 1  | -0.302607 | 2.077202  | 2.757136  |
| 1  | -0.920418 | 0.813141  | 1.909319  |
| 7  | 3.696630  | -2.126521 | -0.178604 |
| 1  | 3.527928  | -2.835922 | -0.884549 |
| 1  | 2.942157  | -1.438993 | -0.235169 |
| 1  | 3.637013  | -2.583909 | 0.725633  |
| 7  | 0.015334  | 3.123935  | -0.662307 |
| 1  | 0.937241  | 3.521931  | -0.813079 |
| 1  | -0.650468 | 3.890248  | -0.668279 |
| 1  | 0.008874  | 2.703615  | 0.269120  |
| 7  | 1.994564  | 0.541817  | -0.315318 |
| 1  | 1.635948  | 0.858992  | -1.212524 |
| 1  | 2.970723  | 0.845505  | -0.253004 |
| 1  | 1.452208  | 1.042873  | 0.388207  |
| 7  | -1.267137 | 0.327417  | -1.344097 |
| 1  | -0.598134 | -0.350237 | -1.702287 |
| 1  | -0.847596 | 1.254047  | -1.445301 |
| 1  | -1.320585 | 0.155296  | -0.339545 |
| 7  | -2.686022 | -0.348787 | 1.584268  |
| 1  | -3.042673 | -0.550782 | 2.514569  |
| 1  | -2.859722 | -1.178073 | 1.005813  |
| 1  | -3.294559 | 0.366469  | 1.177400  |
| 7  | -2.681448 | -2.348937 | -0.799668 |
| 1  | -2.680413 | -1.638156 | -1.528123 |
| 1  | -3.058628 | -3.205335 | -1.191611 |
| 1  | -1.702001 | -2.508186 | -0.551915 |

-----  
Cartesian coordinates of : AM10\_31  
-----

Atomic number (AN) and Cartesian coordinates

| AN | X         | Y         | Z         |
|----|-----------|-----------|-----------|
| 7  | 3.383526  | 1.279784  | 1.257419  |
| 1  | 3.306817  | 0.262320  | 1.266633  |
| 1  | 4.279703  | 1.493863  | 0.826903  |
| 1  | 3.416341  | 1.605138  | 2.218378  |
| 7  | -1.122766 | -1.931307 | 0.991009  |
| 1  | -1.062893 | -2.218332 | 1.963535  |
| 1  | -0.707723 | -2.674607 | 0.436670  |
| 1  | -0.548938 | -1.088739 | 0.869215  |
| 7  | -5.551442 | -0.365143 | -1.159077 |
| 1  | -4.585180 | -0.315428 | -1.496986 |
| 1  | -5.975755 | -1.207415 | -1.533485 |
| 1  | -6.063424 | 0.424652  | -1.538077 |
| 7  | -2.331580 | 2.256255  | 0.574182  |
| 1  | -1.996584 | 2.871458  | 1.310384  |
| 1  | -2.973979 | 2.806900  | 0.010993  |
| 1  | -2.883056 | 1.508182  | 1.018426  |

|   |           |           |           |
|---|-----------|-----------|-----------|
| 7 | 5.582890  | -0.520584 | -0.231387 |
| 1 | 6.212854  | -0.343614 | 0.545242  |
| 1 | 4.780184  | -1.041306 | 0.128926  |
| 1 | 6.079157  | -1.126094 | -0.878460 |
| 7 | 3.133578  | 0.754212  | -1.798789 |
| 1 | 2.808482  | 1.456364  | -1.137022 |
| 1 | 4.110300  | 0.575487  | -1.559578 |
| 1 | 3.102069  | 1.160671  | -2.728168 |
| 7 | 0.415509  | 0.639886  | 0.188364  |
| 1 | 0.632795  | 0.489157  | -0.794730 |
| 1 | 1.215156  | 1.137874  | 0.581659  |
| 1 | -0.402102 | 1.253242  | 0.230506  |
| 7 | -2.471193 | -0.234954 | -1.460576 |
| 1 | -2.219575 | -0.943787 | -0.771571 |
| 1 | -1.875405 | -0.372822 | -2.271242 |
| 1 | -2.217859 | 0.658975  | -1.040451 |
| 7 | -3.856347 | -0.229148 | 1.486181  |
| 1 | -4.594748 | -0.318104 | 0.783627  |
| 1 | -4.269859 | -0.415195 | 2.394331  |
| 1 | -3.166267 | -0.958652 | 1.304871  |
| 7 | 2.623587  | -1.596808 | 0.155696  |
| 1 | 2.611698  | -1.094874 | -0.736914 |
| 1 | 1.743934  | -1.356635 | 0.610887  |
| 1 | 2.603512  | -2.594030 | -0.035656 |

-----

Cartesian coordinates of : AM10\_32

-----

Atomic number (AN) and Cartesian coordinates

| AN | X         | Y         | Z         |
|----|-----------|-----------|-----------|
| 7  | 0.694029  | 1.312493  | 1.805242  |
| 1  | 1.368511  | 0.550015  | 1.943646  |
| 1  | 1.142373  | 2.002339  | 1.205796  |
| 1  | 0.539625  | 1.752763  | 2.707494  |
| 7  | -1.425048 | -2.351482 | -0.837036 |
| 1  | -2.186820 | -3.001515 | -0.665313 |
| 1  | -1.406507 | -2.174791 | -1.841482 |
| 1  | -1.683624 | -1.456583 | -0.405621 |
| 7  | 2.796839  | -0.947525 | 1.648957  |
| 1  | 3.283679  | -0.470350 | 0.892080  |
| 1  | 2.307266  | -1.756486 | 1.252630  |
| 1  | 3.496262  | -1.299505 | 2.295122  |
| 7  | 1.134900  | -3.415407 | 0.585913  |
| 1  | 1.579804  | -4.100878 | -0.017455 |
| 1  | 0.284315  | -3.092065 | 0.108588  |
| 1  | 0.839681  | -3.911602 | 1.421887  |
| 7  | -1.979408 | 0.585895  | 0.220636  |
| 1  | -1.193320 | 0.809607  | 0.838171  |
| 1  | -1.920900 | 1.220724  | -0.571325 |
| 1  | -2.847189 | 0.792015  | 0.717073  |
| 7  | 3.457474  | 1.642148  | -0.253274 |
| 1  | 3.751716  | 1.915250  | 0.680596  |
| 1  | 4.227062  | 1.851661  | -0.881762 |
| 1  | 2.671789  | 2.244523  | -0.512487 |
| 7  | -1.374597 | -0.253232 | -3.107644 |
| 1  | -0.600619 | -0.040939 | -2.474498 |
| 1  | -2.237319 | 0.022359  | -2.648762 |
| 1  | -1.270348 | 0.305073  | -3.948076 |
| 7  | 0.966709  | -0.291102 | -0.993402 |
| 1  | 1.917605  | 0.037048  | -0.816833 |
| 1  | 0.509899  | -0.347274 | -0.082847 |
| 1  | 1.031420  | -1.253417 | -1.317701 |
| 7  | 0.591026  | 2.770493  | -1.014586 |
| 1  | 0.467691  | 1.776888  | -1.228033 |
| 1  | 0.480595  | 3.293309  | -1.878041 |
| 1  | -0.167168 | 3.044985  | -0.395862 |
| 7  | -4.752473 | 0.813793  | 1.862504  |
| 1  | -5.412232 | 1.584118  | 1.835998  |
| 1  | -4.504653 | 0.655957  | 2.833933  |
| 1  | -5.234754 | -0.015757 | 1.531911  |

-----  
Cartesian coordinates of : AM10\_33  
-----

Atomic number (AN) and Cartesian coordinates

| AN | X         | Y         | Z         |
|----|-----------|-----------|-----------|
| 7  | 1.105263  | 3.005263  | -0.142833 |
| 1  | 2.058418  | 2.657939  | -0.016258 |
| 1  | 1.163252  | 4.012308  | -0.258176 |
| 1  | 0.573399  | 2.824115  | 0.712397  |
| 7  | -0.409549 | -2.838062 | 0.644097  |
| 1  | -1.133924 | -3.549125 | 0.655136  |
| 1  | -0.135712 | -2.672111 | -0.328174 |
| 1  | 0.413137  | -3.220940 | 1.109467  |
| 7  | -0.439882 | 1.358816  | -2.214829 |
| 1  | -1.405568 | 1.677212  | -2.198149 |
| 1  | -0.097682 | 1.533764  | -3.156126 |
| 1  | 0.086614  | 1.981530  | -1.584166 |
| 7  | 0.932569  | -1.517535 | -1.890831 |
| 1  | 1.753693  | -1.162078 | -1.405729 |
| 1  | 0.337547  | -0.702276 | -2.062139 |
| 1  | 1.236691  | -1.868619 | -2.793929 |
| 7  | -2.143195 | -0.132910 | 0.181977  |
| 1  | -3.136241 | -0.260984 | -0.015182 |
| 1  | -1.786780 | -1.000283 | 0.585164  |
| 1  | -1.658208 | -0.020650 | -0.707052 |
| 7  | -1.049901 | 2.124404  | 2.033717  |
| 1  | -1.487280 | 1.414418  | 1.430177  |
| 1  | -1.669309 | 2.929726  | 2.054335  |
| 1  | -1.039734 | 1.748603  | 2.977975  |
| 7  | -5.365895 | -0.448909 | -0.146046 |
| 1  | -5.691228 | -0.036923 | 0.722537  |
| 1  | -5.832635 | 0.033026  | -0.907237 |
| 1  | -5.674269 | -1.415498 | -0.161734 |
| 7  | 1.049783  | -0.028133 | 0.791450  |
| 1  | 0.431353  | -0.821162 | 0.980341  |
| 1  | 0.922123  | 0.618579  | 1.568765  |
| 1  | 0.628244  | 0.457860  | -0.002196 |
| 7  | 2.665904  | -2.801952 | 0.803661  |
| 1  | 2.574998  | -3.108736 | -0.160359 |
| 1  | 3.635975  | -2.911996 | 1.078466  |
| 1  | 2.428399  | -1.810321 | 0.837304  |
| 7  | 3.766873  | 1.262593  | 0.057989  |
| 1  | 4.139462  | 0.986714  | -0.844793 |
| 1  | 3.054128  | 0.583279  | 0.332677  |
| 1  | 4.527347  | 1.217611  | 0.728188  |

-----  
Cartesian coordinates of : AM10\_34  
-----

Atomic number (AN) and Cartesian coordinates

| AN | X         | Y         | Z         |
|----|-----------|-----------|-----------|
| 7  | 1.857583  | -1.436047 | 1.833053  |
| 1  | 1.759480  | -2.085091 | 2.606551  |
| 1  | 2.025176  | -1.970561 | 0.982286  |
| 1  | 0.981015  | -0.926627 | 1.727077  |
| 7  | 0.603441  | -1.239109 | -1.357313 |
| 1  | 0.429908  | -1.219843 | -2.358073 |
| 1  | -0.161364 | -1.760080 | -0.926705 |
| 1  | 1.461549  | -1.776284 | -1.211931 |
| 7  | 3.555005  | -2.336488 | -0.753021 |
| 1  | 3.714446  | -1.322915 | -0.709942 |
| 1  | 4.108212  | -2.759191 | -0.012953 |
| 1  | 3.930295  | -2.679937 | -1.631973 |
| 7  | 3.073790  | 0.596712  | -0.208802 |
| 1  | 3.350720  | 1.577413  | -0.214812 |
| 1  | 2.930278  | 0.293746  | 0.754266  |
| 1  | 2.176420  | 0.499395  | -0.680668 |

|   |           |           |           |
|---|-----------|-----------|-----------|
| 7 | -5.621898 | 0.556118  | -0.534518 |
| 1 | -4.857748 | 0.052313  | -0.995414 |
| 1 | -6.196179 | -0.121067 | -0.042783 |
| 1 | -6.204346 | 0.972739  | -1.253827 |
| 7 | -2.794451 | -0.318338 | -1.337101 |
| 1 | -2.379480 | -1.123993 | -0.868613 |
| 1 | -2.580867 | 0.494948  | -0.759609 |
| 1 | -2.305675 | -0.198941 | -2.219092 |
| 7 | -0.351017 | 0.679707  | 0.967253  |
| 1 | 0.346838  | 1.332707  | 1.313937  |
| 1 | -1.230765 | 1.190481  | 0.870805  |
| 1 | -0.046608 | 0.379565  | 0.037779  |
| 7 | -1.475887 | -2.220392 | 0.888285  |
| 1 | -1.200674 | -1.305791 | 1.256630  |
| 1 | -2.369502 | -2.472988 | 1.299701  |
| 1 | -0.792981 | -2.896246 | 1.219666  |
| 7 | 4.406475  | 3.541277  | -0.311606 |
| 1 | 5.171392  | 3.267016  | -0.919660 |
| 1 | 4.804655  | 3.800622  | 0.584898  |
| 1 | 3.977694  | 4.370370  | -0.708988 |
| 7 | -3.271272 | 2.100918  | 0.822038  |
| 1 | -3.223576 | 3.057377  | 0.482527  |
| 1 | -3.334631 | 2.155930  | 1.834901  |
| 1 | -4.156070 | 1.704423  | 0.486145  |

-----

Cartesian coordinates of : AM10\_35

-----

Atomic number (AN) and Cartesian coordinates

| AN | X         | Y         | Z         |
|----|-----------|-----------|-----------|
| 7  | -1.510456 | 2.229475  | -1.573103 |
| 1  | -0.492927 | 2.338839  | -1.635977 |
| 1  | -1.714509 | 1.310520  | -1.958985 |
| 1  | -1.936155 | 2.920949  | -2.182665 |
| 7  | -1.641407 | 2.210703  | 1.562744  |
| 1  | -2.235843 | 2.929049  | 1.964767  |
| 1  | -2.071691 | 1.309905  | 1.758224  |
| 1  | -1.665576 | 2.317115  | 0.542264  |
| 7  | 1.644391  | 2.223861  | -1.549003 |
| 1  | 2.073893  | 1.324838  | -1.754105 |
| 1  | 1.668357  | 2.319448  | -0.527463 |
| 1  | 2.239612  | 2.945882  | -1.943204 |
| 7  | 1.513175  | 2.212526  | 1.587410  |
| 1  | 1.717019  | 1.290678  | 1.966428  |
| 1  | 0.495636  | 2.321731  | 1.650682  |
| 1  | 1.938791  | 2.899317  | 2.202304  |
| 7  | -4.244708 | -3.175549 | -0.074311 |
| 1  | -3.700756 | -4.008937 | -0.272115 |
| 1  | -4.666113 | -3.293745 | 0.841080  |
| 1  | -4.994987 | -3.129675 | -0.755738 |
| 7  | 2.240046  | -0.604718 | -0.024307 |
| 1  | 1.561353  | -0.666550 | 0.739780  |
| 1  | 2.871299  | -1.403463 | 0.043908  |
| 1  | 2.786943  | 0.234214  | 0.151946  |
| 7  | -0.033093 | -0.556363 | 2.250058  |
| 1  | -0.140506 | -1.335166 | 2.892912  |
| 1  | -0.783056 | -0.624353 | 1.551641  |
| 1  | -0.210749 | 0.296544  | 2.774909  |
| 7  | 0.031331  | -0.534774 | -2.259812 |
| 1  | 0.135391  | -1.309066 | -2.908638 |
| 1  | 0.781568  | -0.610655 | -1.562488 |
| 1  | 0.211314  | 0.321518  | -2.778304 |
| 7  | -2.241740 | -0.602617 | 0.013317  |
| 1  | -2.790343 | 0.236590  | -0.156179 |
| 1  | -2.871388 | -1.402071 | -0.061153 |
| 1  | -1.562753 | -0.656956 | -0.751093 |
| 7  | 4.242934  | -3.178563 | 0.065788  |
| 1  | 4.431186  | -3.471628 | -0.887182 |
| 1  | 3.786228  | -3.950247 | 0.540618  |
| 1  | 5.135446  | -3.022503 | 0.522367  |



-----  
 Cartesian coordinates of all the proposed isomers of ammonia clusters (NH<sub>3</sub>)<sub>n</sub>=2-10 at MP2/6-31++G(d,p) level of theory

Cartesian coordinates of ammonia dimer: (NH<sub>3</sub>)<sub>2</sub>

Cartesian coordinates of : NH3\_N2\_2.log

-----  
 Atomic number (AN) and Cartesian coordinates

| AN  | X         | Y         | Z         |
|-----|-----------|-----------|-----------|
| 7.0 | -1.672416 | 0.000000  | -0.099941 |
| 1.0 | -0.689906 | -0.000002 | 0.160913  |
| 1.0 | -2.108960 | -0.816367 | 0.309707  |
| 1.0 | -2.108959 | 0.816366  | 0.309706  |
| 7.0 | 1.558958  | 0.000000  | 0.035708  |
| 1.0 | 1.526855  | 0.000098  | -0.977305 |
| 1.0 | 2.087558  | -0.815243 | 0.323227  |
| 1.0 | 2.087622  | 0.815145  | 0.323385  |

-----

Cartesian coordinates of ammonia trimer: (NH<sub>3</sub>)<sub>3</sub>

Cartesian coordinates of : NH3\_N3\_2.log

-----  
 Atomic number (AN) and Cartesian coordinates

| AN | X         | Y         | Z         |
|----|-----------|-----------|-----------|
| 7  | -0.727259 | 1.677926  | -0.000011 |
| 1  | -1.073226 | 2.174029  | 0.813451  |
| 1  | -1.144814 | 0.747171  | -0.000070 |
| 1  | -1.073274 | 2.174162  | -0.813372 |
| 7  | 1.816773  | -0.209147 | 0.000020  |
| 1  | 2.419656  | -0.157526 | 0.813285  |
| 1  | 1.219490  | 0.617841  | 0.000086  |
| 1  | 2.419273  | -0.157650 | -0.813537 |
| 7  | -1.089508 | -1.468777 | -0.000003 |
| 1  | -1.346166 | -2.016554 | -0.813392 |
| 1  | -1.346314 | -2.016415 | 0.813432  |
| 1  | -0.074668 | -1.365074 | 0.000079  |

-----

Cartesian coordinates of ammonia tetramer: (NH<sub>3</sub>)<sub>4</sub>

Cartesian coordinates of : CY4

-----  
 Atomic number (AN) and Cartesian coordinates

| AN | X         | Y         | Z         |
|----|-----------|-----------|-----------|
| 7  | 2.134740  | -0.618723 | -0.151696 |
| 1  | 2.805893  | -0.922624 | 0.545324  |
| 1  | 2.549015  | -0.822702 | -1.054751 |
| 1  | 1.305745  | -1.209996 | -0.056885 |
| 7  | -0.618721 | -2.134731 | 0.151697  |
| 1  | -1.210002 | -1.305742 | 0.056889  |
| 1  | -0.822690 | -2.549011 | 1.054752  |
| 1  | -0.922617 | -2.805886 | -0.545325 |
| 7  | -2.134741 | 0.618716  | -0.151696 |
| 1  | -2.549021 | 0.822692  | -1.054750 |
| 1  | -1.305747 | 1.209989  | -0.056890 |
| 1  | -2.805891 | 0.922622  | 0.545326  |
| 7  | 0.618722  | 2.134739  | 0.151696  |
| 1  | 0.922627  | 2.805887  | -0.545329 |
| 1  | 1.209990  | 1.305741  | 0.056888  |
| 1  | 0.822705  | 2.549018  | 1.054749  |

-----

Cartesian coordinates of : P4

-----  
Atomic number (AN) and Cartesian coordinates

| AN | X         | Y         | Z         |
|----|-----------|-----------|-----------|
| 7  | -0.540719 | -1.476443 | 1.149284  |
| 1  | -1.406509 | -1.975887 | 1.322649  |
| 1  | 0.175604  | -1.951239 | 1.688557  |
| 1  | -0.304517 | -1.587434 | 0.160923  |
| 7  | 0.360852  | -0.769719 | -1.712072 |
| 1  | 1.271592  | -0.495550 | -1.353536 |
| 1  | -0.218096 | 0.065716  | -1.678320 |
| 1  | 0.472403  | -1.039906 | -2.682217 |
| 7  | 1.785119  | 0.858567  | 0.598655  |
| 1  | 2.443538  | 1.156136  | 1.308760  |
| 1  | 1.023180  | 0.370880  | 1.059965  |
| 1  | 1.392712  | 1.689186  | 0.170686  |
| 7  | -1.538968 | 1.349978  | -0.111810 |
| 1  | -1.490417 | 2.207915  | 0.425936  |
| 1  | -1.320551 | 0.578498  | 0.515810  |
| 1  | -2.502937 | 1.245008  | -0.407615 |

-----

Cartesian coordinates of : BC4\_2

-----  
Atomic number (AN) and Cartesian coordinates

| AN | X         | Y         | Z         |
|----|-----------|-----------|-----------|
| 7  | 1.890320  | 1.581699  | 0.332849  |
| 1  | 2.464085  | 2.166181  | -0.264573 |
| 1  | 1.622201  | 2.151504  | 1.127214  |
| 1  | 1.041660  | 1.341784  | -0.183886 |
| 7  | -0.441691 | 0.064164  | -1.098729 |
| 1  | -1.369220 | -0.031511 | -0.690399 |
| 1  | 0.123241  | -0.727395 | -0.795480 |
| 1  | -0.549283 | -0.005683 | -2.104415 |
| 7  | -3.330840 | -0.062771 | 0.442178  |
| 1  | -3.932424 | 0.718558  | 0.208667  |
| 1  | -3.058247 | 0.046709  | 1.412054  |
| 1  | -3.892759 | -0.903796 | 0.380352  |
| 7  | 1.976961  | -1.595148 | 0.262485  |
| 1  | 2.753866  | -1.992265 | -0.253335 |
| 1  | 1.947880  | -2.068094 | 1.158430  |
| 1  | 2.185754  | -0.611602 | 0.433887  |

-----

Cartesian coordinates of ammonia pentamer: (NH3)5

Cartesian coordinates of : MP2\_AM5\_1

-----  
Atomic number (AN) and Cartesian coordinates

| AN | X         | Y         | Z         |
|----|-----------|-----------|-----------|
| 7  | 2.148530  | -0.781362 | 0.964641  |
| 1  | 1.839127  | -0.554926 | 1.903526  |
| 1  | 3.020593  | -1.289640 | 1.062369  |
| 1  | 1.460839  | -1.423309 | 0.563333  |
| 7  | -0.076250 | -2.496942 | -0.458428 |
| 1  | -0.901442 | -1.903219 | -0.343140 |
| 1  | -0.329824 | -3.427812 | -0.145345 |
| 1  | 0.104595  | -2.569729 | -1.453879 |
| 7  | -2.533337 | -0.548740 | -0.020680 |
| 1  | -3.159642 | -0.434650 | -0.810541 |
| 1  | -2.116913 | 0.366886  | 0.166431  |
| 1  | -3.119714 | -0.776587 | 0.775216  |
| 7  | 1.588532  | 1.612729  | -0.996322 |
| 1  | 2.359049  | 2.265974  | -1.085638 |

|   |           |          |           |
|---|-----------|----------|-----------|
| 1 | 1.439083  | 1.214307 | -1.916893 |
| 1 | 1.896249  | 0.853954 | -0.383662 |
| 7 | -1.105717 | 2.226533 | 0.511881  |
| 1 | -0.861578 | 2.392600 | 1.482406  |
| 1 | -1.554625 | 3.074350 | 0.182212  |
| 1 | -0.228101 | 2.126277 | -0.004035 |

-----

Cartesian coordinates of :     MP2\_AM5\_2

-----

Atomic number (AN) and Cartesian coordinates

| AN | X         | Y         | Z         |
|----|-----------|-----------|-----------|
| 7  | -0.695861 | -2.082414 | 0.623687  |
| 1  | -1.349458 | -1.303387 | 0.511691  |
| 1  | -0.646568 | -2.294974 | 1.614717  |
| 1  | -1.107452 | -2.896768 | 0.179967  |
| 7  | -2.327672 | 0.546283  | 0.107120  |
| 1  | -2.730764 | 0.627561  | -0.820182 |
| 1  | -1.527573 | 1.181638  | 0.150901  |
| 1  | -3.027442 | 0.893148  | 0.754353  |
| 7  | 0.339132  | 2.224858  | 0.387285  |
| 1  | 0.961515  | 1.469942  | 0.687205  |
| 1  | 0.261446  | 2.878168  | 1.159892  |
| 1  | 0.822723  | 2.721976  | -0.353680 |
| 7  | 0.689731  | -0.365669 | -1.944432 |
| 1  | 0.309274  | -1.006834 | -1.253222 |
| 1  | 0.505775  | -0.746423 | -2.865152 |
| 1  | 0.168461  | 0.499557  | -1.859133 |
| 7  | 2.092005  | -0.330166 | 0.822992  |
| 1  | 1.400711  | -1.074589 | 0.874670  |
| 1  | 2.888799  | -0.597665 | 1.389391  |
| 1  | 2.389201  | -0.301601 | -0.147985 |

-----

Cartesian coordinates of :     MP2\_AM5\_3

-----

Atomic number (AN) and Cartesian coordinates

| AN | X         | Y         | Z         |
|----|-----------|-----------|-----------|
| 7  | -0.304684 | 2.045427  | -0.255844 |
| 1  | -1.127535 | 1.434740  | -0.264253 |
| 1  | -0.203775 | 2.418204  | -1.194754 |
| 1  | -0.523807 | 2.840729  | 0.335788  |
| 7  | 1.000550  | 0.086921  | 1.992895  |
| 1  | 0.330578  | 0.132002  | 2.752570  |
| 1  | 0.717433  | 0.771597  | 1.293736  |
| 1  | 1.893510  | 0.382144  | 2.371301  |
| 7  | 1.987606  | -0.071293 | -1.404516 |
| 1  | 2.668136  | -0.411399 | -0.734893 |
| 1  | 1.409198  | 0.616552  | -0.928735 |
| 1  | 2.496839  | 0.406299  | -2.139017 |
| 7  | -2.559960 | -0.114417 | -0.263497 |
| 1  | -3.212218 | -0.245656 | 0.502118  |
| 1  | -1.878512 | -0.878405 | -0.223929 |
| 1  | -3.095340 | -0.227989 | -1.117608 |
| 7  | -0.142009 | -2.052515 | -0.122060 |
| 1  | 0.423045  | -1.772454 | -0.920522 |
| 1  | -0.098081 | -3.063142 | -0.052713 |
| 1  | 0.330017  | -1.662086 | 0.692065  |

-----

Cartesian coordinates of :     MP2\_AM5\_4

-----

Atomic number (AN) and Cartesian coordinates

| AN | X        | Y         | Z        |
|----|----------|-----------|----------|
| 7  | 2.528176 | -1.543265 | 0.658146 |
| 1  | 2.711174 | -0.548183 | 0.536114 |

|   |           |           |           |
|---|-----------|-----------|-----------|
| 1 | 3.332998  | -2.054262 | 0.314054  |
| 1 | 2.464885  | -1.730164 | 1.652335  |
| 7 | 2.228033  | 1.473655  | -0.277421 |
| 1 | 1.980440  | 2.289188  | 0.271172  |
| 1 | 1.364235  | 1.040416  | -0.600468 |
| 1 | 2.731626  | 1.809449  | -1.090742 |
| 7 | -0.078874 | -0.657157 | -1.009356 |
| 1 | -0.998164 | -1.017397 | -0.750013 |
| 1 | 0.623585  | -1.202112 | -0.508001 |
| 1 | 0.041296  | -0.863735 | -1.996102 |
| 7 | -1.618708 | 1.700250  | 0.549000  |
| 1 | -1.166616 | 1.916346  | 1.429983  |
| 1 | -1.784197 | 2.580234  | 0.074405  |
| 1 | -0.968927 | 1.152918  | -0.013469 |
| 7 | -3.086279 | -1.059098 | 0.070715  |
| 1 | -3.309083 | -1.610190 | 0.891641  |
| 1 | -3.910464 | -1.063544 | -0.519165 |
| 1 | -2.919215 | -0.099661 | 0.370667  |

-----

Cartesian coordinates of :     MP2\_AM5\_5

-----

Atomic number (AN) and Cartesian coordinates

| AN | X         | Y         | Z         |
|----|-----------|-----------|-----------|
| 7  | -0.490174 | 1.351105  | 1.438209  |
| 1  | -0.715442 | 1.988720  | 2.193292  |
| 1  | 0.178478  | 0.678381  | 1.798216  |
| 1  | -1.333479 | 0.831600  | 1.201334  |
| 7  | -2.662375 | -0.292348 | -0.272864 |
| 1  | -1.893546 | -0.150413 | -0.926902 |
| 1  | -3.427047 | 0.309782  | -0.557469 |
| 1  | -2.987793 | -1.246429 | -0.381467 |
| 7  | 0.090906  | 0.677457  | -1.612518 |
| 1  | 1.083874  | 0.448282  | -1.608374 |
| 1  | -0.037440 | 1.318281  | -0.829876 |
| 1  | -0.093247 | 1.189585  | -2.468944 |
| 7  | 2.809300  | 0.094086  | -0.104747 |
| 1  | 2.830804  | 0.989109  | 0.370580  |
| 1  | 3.738472  | -0.304941 | -0.040554 |
| 1  | 2.169076  | -0.514508 | 0.401206  |
| 7  | 0.309097  | -1.783614 | 0.524718  |
| 1  | 0.556236  | -2.740039 | 0.294953  |
| 1  | 0.069240  | -1.305588 | -0.340840 |
| 1  | -0.535455 | -1.818621 | 1.085263  |

-----

Cartesian coordinates of :     MP2\_AM5\_6

-----

Atomic number (AN) and Cartesian coordinates

| AN | X         | Y         | Z         |
|----|-----------|-----------|-----------|
| 7  | 2.827999  | -1.231549 | 0.334487  |
| 1  | 1.870675  | -1.540470 | 0.154406  |
| 1  | 3.039329  | -1.440879 | 1.303964  |
| 1  | 3.447989  | -1.805836 | -0.225893 |
| 7  | -0.222756 | -1.721462 | -0.302470 |
| 1  | -0.812888 | -2.368666 | 0.208605  |
| 1  | -0.405997 | -1.879194 | -1.287491 |
| 1  | -0.541356 | -0.777341 | -0.082006 |
| 7  | 2.113332  | 1.761208  | -0.353822 |
| 1  | 2.323104  | 1.948346  | -1.328498 |
| 1  | 2.479715  | 0.831207  | -0.138742 |
| 1  | 2.650725  | 2.430560  | 0.186601  |
| 7  | -0.931573 | 1.341636  | 0.351690  |
| 1  | -1.075905 | 1.660849  | 1.304612  |
| 1  | -1.526281 | 1.921690  | -0.232255 |
| 1  | 0.039239  | 1.562504  | 0.112462  |
| 7  | -3.840990 | -0.068195 | -0.059471 |
| 1  | -4.310773 | -0.318963 | 0.801519  |

```

1    -2.851426    0.044316    0.135970
1    -3.948233   -0.839577   -0.706147
-----

```

Cartesian coordinates of ammonia hexamer: (NH<sub>3</sub>)<sub>6</sub>

Cartesian coordinates of : MP2\_AM6\_1

-----  
Atomic number (AN) and Cartesian coordinates

| AN | X         | Y         | Z         |
|----|-----------|-----------|-----------|
| 7  | -1.440792 | -1.095558 | 1.488676  |
| 1  | -1.519084 | -0.087761 | 1.353300  |
| 1  | -0.586741 | -1.251086 | 2.013827  |
| 1  | -2.211433 | -1.393318 | 2.077153  |
| 7  | 1.440792  | 1.095555  | -1.488680 |
| 1  | 1.519087  | 0.087758  | -1.353303 |
| 1  | 2.211429  | 1.393314  | -2.077164 |
| 1  | 0.586737  | 1.251081  | -2.013825 |
| 7  | 1.440798  | -1.837019 | -0.204354 |
| 1  | 0.586741  | -2.369581 | -0.076529 |
| 1  | 1.519031  | -1.215880 | 0.600741  |
| 1  | 2.211440  | -2.495532 | -0.167925 |
| 7  | -1.440681 | -0.741528 | -1.693160 |
| 1  | -1.518983 | -1.128188 | -0.752695 |
| 1  | -0.586597 | -1.118516 | -2.090397 |
| 1  | -2.211285 | -1.102329 | -2.245289 |
| 7  | 1.440684  | 0.741533  | 1.693166  |
| 1  | 2.211288  | 1.102334  | 2.245296  |
| 1  | 0.586600  | 1.118520  | 2.090402  |
| 1  | 1.518988  | 1.128194  | 0.752701  |
| 7  | -1.440802 | 1.837017  | 0.204352  |
| 1  | -0.586747 | 2.369584  | 0.076527  |
| 1  | -2.211447 | 2.495526  | 0.167923  |
| 1  | -1.519031 | 1.215878  | -0.600743 |

-----

Cartesian coordinates of : MP2\_AM6\_2

-----  
Atomic number (AN) and Cartesian coordinates

| AN | X         | Y         | Z         |
|----|-----------|-----------|-----------|
| 7  | -0.604489 | -0.012173 | 2.052063  |
| 1  | -0.684751 | -0.150091 | 3.053107  |
| 1  | 0.365836  | 0.207486  | 1.846950  |
| 1  | -0.825510 | -0.893265 | 1.589190  |
| 7  | -2.404279 | 1.128626  | -0.248908 |
| 1  | -2.545947 | 2.130089  | -0.328901 |
| 1  | -1.905557 | 0.953217  | 0.626192  |
| 1  | -3.326545 | 0.716718  | -0.151967 |
| 7  | 1.953334  | -1.534851 | -0.209514 |
| 1  | 1.947964  | -2.200686 | 0.556404  |
| 1  | 2.021435  | -0.605303 | 0.205158  |
| 1  | 2.812105  | -1.695836 | -0.725402 |
| 7  | -1.213243 | -2.045925 | -0.268723 |
| 1  | -0.234603 | -2.015823 | -0.547384 |
| 1  | -1.693292 | -1.294945 | -0.754398 |
| 1  | -1.607360 | -2.923008 | -0.588799 |
| 7  | 0.312385  | 0.866601  | -1.928297 |
| 1  | 0.651877  | -0.089536 | -1.886221 |
| 1  | 0.272922  | 1.135124  | -2.905177 |
| 1  | -0.642142 | 0.868001  | -1.568780 |
| 7  | 1.915155  | 1.599688  | 0.621652  |
| 1  | 1.422616  | 1.616884  | -0.275041 |
| 1  | 2.835776  | 2.000911  | 0.477086  |
| 1  | 1.423147  | 2.226300  | 1.250079  |

-----

Cartesian coordinates of : MP2\_AM6\_3

-----  
Atomic number (AN) and Cartesian coordinates

| AN | X         | Y         | Z         |
|----|-----------|-----------|-----------|
| 7  | 1.400343  | 2.118960  | -0.340143 |
| 1  | 1.697075  | 2.904965  | 0.228798  |
| 1  | 1.539663  | 2.400020  | -1.305185 |
| 1  | 2.037351  | 1.340927  | -0.152695 |
| 7  | 0.343110  | -2.213198 | -0.384504 |
| 1  | -0.097695 | -1.477961 | -0.947345 |
| 1  | -0.398188 | -2.652173 | 0.152437  |
| 1  | 0.678798  | -2.923922 | -1.026877 |
| 7  | -0.987466 | 0.244440  | -1.743953 |
| 1  | -1.132062 | 0.488659  | -2.717457 |
| 1  | -0.445481 | 0.992377  | -1.318704 |
| 1  | -1.899711 | 0.239303  | -1.287608 |
| 7  | -0.457825 | 0.305293  | 1.685869  |
| 1  | -0.266253 | 0.600842  | 2.637126  |
| 1  | -0.026871 | 0.986646  | 1.063063  |
| 1  | 0.046031  | -0.563060 | 1.533724  |
| 7  | 2.948206  | -0.531780 | 0.345813  |
| 1  | 3.243923  | -0.635141 | 1.310603  |
| 1  | 3.710163  | -0.880357 | -0.225904 |
| 1  | 2.150071  | -1.153648 | 0.203156  |
| 7  | -3.329382 | 0.091793  | 0.384191  |
| 1  | -3.807214 | -0.774695 | 0.603919  |
| 1  | -3.952662 | 0.846931  | 0.646438  |
| 1  | -2.495835 | 0.151726  | 0.971599  |

-----  
Cartesian coordinates of : MP2\_AM6\_4

-----  
Atomic number (AN) and Cartesian coordinates

| AN | X         | Y         | Z         |
|----|-----------|-----------|-----------|
| 7  | 2.352710  | -1.247749 | -0.094691 |
| 1  | 1.918231  | -1.647371 | 0.730730  |
| 1  | 3.054644  | -1.903556 | -0.418311 |
| 1  | 1.619775  | -1.185998 | -0.797810 |
| 7  | -0.153423 | 0.028071  | -1.718861 |
| 1  | 0.350167  | 0.793940  | -1.276347 |
| 1  | -1.144784 | 0.204232  | -1.545484 |
| 1  | -0.006913 | 0.111648  | -2.719713 |
| 7  | -0.615720 | 0.824313  | 1.632351  |
| 1  | 0.154543  | 1.270364  | 1.137757  |
| 1  | -0.436014 | -0.177602 | 1.626619  |
| 1  | -0.579359 | 1.138048  | 2.595947  |
| 7  | 2.112782  | 1.852582  | 0.074744  |
| 1  | 2.463479  | 0.893212  | 0.094192  |
| 1  | 2.491665  | 2.340542  | 0.879275  |
| 1  | 2.500892  | 2.307847  | -0.744565 |
| 7  | -2.950369 | 0.759172  | -0.445542 |
| 1  | -3.334126 | 1.662282  | -0.701503 |
| 1  | -2.339271 | 0.897339  | 0.363108  |
| 1  | -3.732713 | 0.185001  | -0.151622 |
| 7  | -0.767169 | -2.193145 | 0.566287  |
| 1  | -0.439916 | -3.137952 | 0.396955  |
| 1  | -0.624525 | -1.661413 | -0.291067 |
| 1  | -1.767450 | -2.253280 | 0.721828  |

-----  
Cartesian coordinates of : MP2\_AM6\_5

-----  
Atomic number (AN) and Cartesian coordinates

| AN | X        | Y         | Z        |
|----|----------|-----------|----------|
| 7  | 0.278215 | -1.613878 | 1.312605 |

|   |           |           |           |
|---|-----------|-----------|-----------|
| 1 | 1.129377  | -1.577335 | 0.750492  |
| 1 | 0.462777  | -2.225342 | 2.100452  |
| 1 | 0.119711  | -0.679896 | 1.683687  |
| 7 | -1.271512 | 1.220172  | -1.588054 |
| 1 | -0.628340 | 1.160252  | -2.371292 |
| 1 | -2.069901 | 1.752841  | -1.918493 |
| 1 | -1.597875 | 0.267141  | -1.399924 |
| 7 | 1.550862  | 1.821448  | -0.010542 |
| 1 | 0.655706  | 1.860377  | -0.492980 |
| 1 | 1.998900  | 2.725316  | -0.113475 |
| 1 | 1.328381  | 1.702892  | 0.972793  |
| 7 | 2.747679  | -1.032235 | -0.633137 |
| 1 | 2.498542  | -0.045859 | -0.543178 |
| 1 | 2.647440  | -1.293609 | -1.607411 |
| 1 | 3.730378  | -1.127855 | -0.403173 |
| 7 | -2.041263 | -1.694881 | -0.746279 |
| 1 | -1.889372 | -2.411891 | -1.448034 |
| 1 | -2.929427 | -1.913858 | -0.307254 |
| 1 | -1.311617 | -1.808406 | -0.034764 |
| 7 | -1.200656 | 1.229508  | 1.711888  |
| 1 | -1.256974 | 1.297414  | 0.697665  |
| 1 | -1.358612 | 2.157762  | 2.088140  |
| 1 | -1.972364 | 0.649111  | 2.021384  |

-----

Cartesian coordinates of : MP2\_AM6\_6

-----

Atomic number (AN) and Cartesian coordinates

| AN | X         | Y         | Z         |
|----|-----------|-----------|-----------|
| 7  | 2.794529  | -0.938451 | -0.443028 |
| 1  | 3.691192  | -0.837992 | 0.020931  |
| 1  | 2.909610  | -1.673526 | -1.132579 |
| 1  | 2.116179  | -1.259968 | 0.252763  |
| 7  | 0.412015  | -1.088857 | 1.509994  |
| 1  | 0.485194  | -0.073895 | 1.542039  |
| 1  | 0.350601  | -1.426216 | 2.464210  |
| 1  | -0.467142 | -1.319849 | 1.050960  |
| 7  | -2.033280 | 1.630051  | 0.072820  |
| 1  | -1.376286 | 1.379470  | -0.665821 |
| 1  | -1.481800 | 1.930062  | 0.869548  |
| 1  | -2.579194 | 2.426286  | -0.236066 |
| 7  | 1.429687  | 1.867184  | 0.593611  |
| 1  | 0.888649  | 2.350817  | -0.114803 |
| 1  | 1.982072  | 1.166251  | 0.104103  |
| 1  | 2.073477  | 2.543327  | 0.990082  |
| 7  | -2.525190 | -1.442445 | 0.088937  |
| 1  | -2.633013 | -0.430573 | 0.183181  |
| 1  | -3.004538 | -1.882935 | 0.866833  |
| 1  | -3.020367 | -1.726676 | -0.749663 |
| 7  | -0.089487 | -0.034487 | -1.791529 |
| 1  | 0.892850  | -0.129684 | -1.544602 |
| 1  | -0.162632 | -0.193466 | -2.790783 |
| 1  | -0.582768 | -0.792402 | -1.325965 |

-----

Cartesian coordinates of : MP2\_AM6\_7

-----

Atomic number (AN) and Cartesian coordinates

| AN | X         | Y         | Z         |
|----|-----------|-----------|-----------|
| 7  | -0.053788 | -0.242752 | 1.980746  |
| 1  | 0.567010  | -1.044748 | 1.948982  |
| 1  | -0.047192 | 0.091869  | 2.938685  |
| 1  | 0.381283  | 0.475484  | 1.404695  |
| 7  | 0.236456  | -2.047479 | -1.018068 |
| 1  | 0.366084  | -3.000873 | -1.337040 |
| 1  | -0.467050 | -2.066046 | -0.287783 |
| 1  | 1.108921  | -1.735166 | -0.593690 |
| 7  | -2.952904 | -0.130189 | 0.630126  |

|   |           |           |           |
|---|-----------|-----------|-----------|
| 1 | -3.570451 | 0.444869  | 1.192062  |
| 1 | -2.085309 | -0.257480 | 1.152282  |
| 1 | -3.399949 | -1.035732 | 0.540190  |
| 7 | -1.070154 | 0.748808  | -1.808470 |
| 1 | -0.628879 | -0.163422 | -1.919904 |
| 1 | -1.425913 | 1.032113  | -2.714928 |
| 1 | -1.871720 | 0.598970  | -1.195958 |
| 7 | 0.973828  | 2.169881  | -0.026972 |
| 1 | 0.280988  | 1.810925  | -0.696536 |
| 1 | 1.671295  | 2.680392  | -0.559900 |
| 1 | 0.504428  | 2.864118  | 0.546489  |
| 7 | 2.796471  | -0.504658 | 0.122025  |
| 1 | 3.417325  | -0.477401 | -0.679519 |
| 1 | 3.386640  | -0.559955 | 0.944935  |
| 1 | 2.303122  | 0.386805  | 0.161230  |

-----

Cartesian coordinates of : MP2\_AM6\_8

-----

Atomic number (AN) and Cartesian coordinates

| AN | X         | Y         | Z         |
|----|-----------|-----------|-----------|
| 7  | 0.120089  | -1.313572 | -1.025284 |
| 1  | 0.119682  | -1.831143 | -1.898234 |
| 1  | 0.101276  | -0.328349 | -1.270147 |
| 1  | -0.768227 | -1.514476 | -0.560728 |
| 7  | -2.691088 | -1.590529 | 0.422202  |
| 1  | -2.968031 | -0.642459 | 0.160037  |
| 1  | -2.748644 | -1.658038 | 1.432423  |
| 1  | -3.385703 | -2.229513 | 0.051235  |
| 7  | -0.120093 | 1.313568  | 1.025278  |
| 1  | 0.768225  | 1.514475  | 0.560729  |
| 1  | -0.101280 | 0.328342  | 1.270133  |
| 1  | -0.119690 | 1.831132  | 1.898232  |
| 7  | 2.896343  | -1.418825 | 0.442047  |
| 1  | 1.969427  | -1.541667 | 0.027422  |
| 1  | 2.813563  | -1.587448 | 1.438628  |
| 1  | 3.498128  | -2.147719 | 0.074781  |
| 7  | -2.896343 | 1.418823  | -0.442058 |
| 1  | -2.813561 | 1.587439  | -1.438640 |
| 1  | -1.969427 | 1.541666  | -0.027433 |
| 1  | -3.498127 | 2.147722  | -0.074798 |
| 7  | 2.691091  | 1.590536  | -0.422184 |
| 1  | 2.748652  | 1.658057  | -1.432404 |
| 1  | 2.968032  | 0.642463  | -0.160030 |
| 1  | 3.385706  | 2.229514  | -0.051207 |

-----

Cartesian coordinates of : MP2\_AM6\_9

-----

Atomic number (AN) and Cartesian coordinates

| AN | X         | Y         | Z         |
|----|-----------|-----------|-----------|
| 7  | -2.322395 | 1.215330  | 0.014541  |
| 1  | -3.206081 | 1.349375  | 0.493333  |
| 1  | -2.157339 | 0.212358  | -0.050451 |
| 1  | -2.438947 | 1.566087  | -0.929988 |
| 7  | 0.658543  | 2.129980  | -0.715936 |
| 1  | 1.355141  | 1.550368  | -0.258098 |
| 1  | -0.213228 | 2.033512  | -0.201482 |
| 1  | 0.960628  | 3.094589  | -0.646395 |
| 7  | -0.285372 | -0.262205 | 2.144995  |
| 1  | -0.814431 | -0.836432 | 1.492021  |
| 1  | -0.663087 | 0.675260  | 2.049377  |
| 1  | -0.503578 | -0.579357 | 3.083391  |
| 7  | 2.572763  | -0.345125 | 0.845112  |
| 1  | 3.211108  | 0.315024  | 1.276259  |
| 1  | 3.001057  | -1.259551 | 0.943077  |
| 1  | 1.709403  | -0.346738 | 1.393523  |
| 7  | 0.921009  | -0.748490 | -1.946987 |



|   |           |           |           |
|---|-----------|-----------|-----------|
| 1 | 0.685457  | 0.222905  | -2.137930 |
| 1 | 1.340557  | -1.130978 | -2.787501 |
| 1 | 1.646617  | -0.702733 | -1.232995 |
| 7 | -1.500007 | -1.928939 | -0.410891 |
| 1 | -1.239328 | -2.808199 | 0.024624  |
| 1 | -0.710688 | -1.634156 | -0.996769 |
| 1 | -2.275046 | -2.145191 | -1.029832 |

-----

Cartesian coordinates of : MP2\_AM6\_10

-----

Atomic number (AN) and Cartesian coordinates

| AN | X         | Y         | Z         |
|----|-----------|-----------|-----------|
| 7  | -0.109825 | -0.702344 | 1.673402  |
| 1  | -0.127428 | -1.058683 | 2.623220  |
| 1  | 0.811726  | -0.917807 | 1.292911  |
| 1  | -0.785374 | -1.242925 | 1.140684  |
| 7  | 1.799874  | 1.722224  | -0.572681 |
| 1  | 2.070902  | 2.488931  | -1.177574 |
| 1  | 1.334405  | 2.122049  | 0.234309  |
| 1  | 1.121056  | 1.142634  | -1.068153 |
| 7  | 2.868092  | -1.009749 | 0.420181  |
| 1  | 3.470493  | -1.030965 | 1.236088  |
| 1  | 2.800122  | -0.039995 | 0.105009  |
| 1  | 3.349865  | -1.533462 | -0.302845 |
| 7  | 0.109841  | -0.702473 | -1.673322 |
| 1  | 0.127499  | -1.058920 | -2.623098 |
| 1  | -0.811726 | -0.917902 | -1.292849 |
| 1  | 0.785370  | -1.242981 | -1.140505 |
| 7  | -2.868094 | -1.009773 | -0.420170 |
| 1  | -3.470430 | -1.030948 | -1.236127 |
| 1  | -2.800147 | -0.040030 | -0.104957 |
| 1  | -3.349930 | -1.533517 | 0.302792  |
| 7  | -1.799889 | 1.722237  | 0.572591  |
| 1  | -1.121095 | 1.142689  | 1.068145  |
| 1  | -2.070909 | 2.489027  | 1.177383  |
| 1  | -1.334393 | 2.121951  | -0.234438 |

-----

Cartesian coordinates of : MP2\_AM6\_11

-----

Atomic number (AN) and Cartesian coordinates

| AN | X         | Y         | Z         |
|----|-----------|-----------|-----------|
| 7  | 0.168428  | -0.073207 | 1.959775  |
| 1  | 0.403777  | -0.515918 | 2.840986  |
| 1  | 0.275102  | -0.766020 | 1.221392  |
| 1  | -0.817047 | 0.164023  | 1.996862  |
| 7  | 1.181470  | 1.802799  | -0.368428 |
| 1  | 2.005780  | 1.301973  | -0.695436 |
| 1  | 1.050004  | 1.498228  | 0.595782  |
| 1  | 1.421515  | 2.788710  | -0.354735 |
| 7  | 3.238249  | -0.624378 | -0.201827 |
| 1  | 3.483848  | -0.446280 | 0.765297  |
| 1  | 3.926263  | -1.268764 | -0.573851 |
| 1  | 2.333476  | -1.091251 | -0.212956 |
| 7  | 0.249322  | -1.401129 | -0.987781 |
| 1  | 0.515827  | -2.015391 | -1.750344 |
| 1  | 0.302008  | -0.447704 | -1.336701 |
| 1  | -0.732157 | -1.589283 | -0.776884 |
| 7  | -2.756608 | -1.379553 | -0.040988 |
| 1  | -3.565670 | -1.637540 | -0.594798 |
| 1  | -2.660650 | -0.363300 | -0.077531 |
| 7  | -1.992956 | 1.671912  | -0.415710 |
| 1  | -2.186110 | 2.393089  | 0.271953  |
| 1  | -2.428673 | 1.981913  | -1.278374 |
| 1  | -0.982649 | 1.684375  | -0.571699 |
| 1  | -2.959978 | -1.645967 | 0.915753  |

-----

Cartesian coordinates of : MP2\_AM6\_12

-----  
Atomic number (AN) and Cartesian coordinates

| AN | X         | Y         | Z         |
|----|-----------|-----------|-----------|
| 7  | -1.130512 | -2.522886 | -0.758428 |
| 1  | -1.637846 | -3.401183 | -0.761054 |
| 1  | -1.053465 | -2.233149 | -1.727387 |
| 1  | -1.718408 | -1.833615 | -0.283065 |
| 7  | 1.130482  | 2.522944  | 0.758286  |
| 1  | 1.718421  | 1.833653  | 0.283005  |
| 1  | 1.053438  | 2.233300  | 1.727273  |
| 1  | 1.637771  | 3.401268  | 0.760831  |
| 7  | 2.750308  | 0.282416  | -0.758269 |
| 1  | 2.461049  | 0.204287  | -1.727284 |
| 1  | 2.447236  | -0.571360 | -0.282977 |
| 1  | 3.764603  | 0.282190  | -0.760706 |
| 7  | 1.619650  | -2.240501 | 0.758355  |
| 1  | 2.126586  | -3.119030 | 0.760910  |
| 1  | 0.728760  | -2.404950 | 0.283006  |
| 1  | 1.407278  | -2.028979 | 1.727335  |
| 7  | -1.619736 | 2.240471  | -0.758364 |
| 1  | -2.126701 | 3.118981  | -0.760911 |
| 1  | -1.407421 | 2.028921  | -1.727350 |
| 1  | -0.728821 | 2.404955  | -0.283073 |
| 7  | -2.750195 | -0.282451 | 0.758414  |
| 1  | -2.460770 | -0.204337 | 1.727380  |
| 1  | -3.764490 | -0.282226 | 0.761023  |
| 1  | -2.447200 | 0.571327  | 0.283080  |

-----

Cartesian coordinates of : MP2\_AM6\_13

-----  
Atomic number (AN) and Cartesian coordinates

| AN | X         | Y         | Z         |
|----|-----------|-----------|-----------|
| 7  | -2.077617 | -2.089352 | 0.135043  |
| 1  | -2.766605 | -1.335651 | 0.103789  |
| 1  | -2.047220 | -2.431768 | 1.089266  |
| 1  | -2.434746 | -2.851148 | -0.431302 |
| 7  | 0.608243  | -0.656627 | -0.835769 |
| 1  | 0.663728  | -0.783119 | -1.842103 |
| 1  | -0.216777 | -1.179235 | -0.530887 |
| 1  | 1.426720  | -1.122819 | -0.442413 |
| 7  | -0.989164 | 1.826217  | 0.437782  |
| 1  | -0.738167 | 1.864171  | 1.419783  |
| 1  | -0.703051 | 2.709128  | 0.029266  |
| 1  | -0.423646 | 1.091909  | 0.009319  |
| 7  | 3.485487  | -1.356367 | 0.480832  |
| 1  | 3.562397  | -0.343572 | 0.398729  |
| 1  | 4.286841  | -1.770570 | 0.018794  |
| 1  | 3.555160  | -1.597155 | 1.462894  |
| 7  | -3.829252 | 0.535275  | -0.026649 |
| 1  | -4.199150 | 0.774979  | -0.939782 |
| 1  | -2.983206 | 1.089032  | 0.120404  |
| 1  | -4.518920 | 0.834865  | 0.653443  |
| 7  | 2.790056  | 1.654395  | -0.202860 |
| 1  | 2.552692  | 2.395490  | 0.446473  |
| 1  | 1.930751  | 1.161463  | -0.439958 |
| 1  | 3.138928  | 2.099210  | -1.044374 |

-----

Cartesian coordinates of : MP2\_AM6\_14

-----  
Atomic number (AN) and Cartesian coordinates

| AN | X         | Y        | Z         |
|----|-----------|----------|-----------|
| 7  | -2.892584 | 0.614757 | -0.291027 |

-----

|   |           |           |           |
|---|-----------|-----------|-----------|
| 1 | -3.752783 | 0.545720  | 0.242365  |
| 1 | -3.141343 | 1.048389  | -1.174003 |
| 1 | -2.271416 | 1.261311  | 0.199299  |
| 7 | -0.441643 | 2.200052  | 0.822077  |
| 1 | 0.005946  | 1.779815  | 0.008184  |
| 1 | 0.023640  | 1.828060  | 1.643023  |
| 1 | -0.263658 | 3.197914  | 0.804792  |
| 7 | 0.306054  | 0.298884  | -1.621286 |
| 1 | 0.431409  | 0.482394  | -2.611546 |
| 1 | -0.677316 | 0.081350  | -1.481869 |
| 1 | 0.819326  | -0.557150 | -1.397888 |
| 7 | -1.458026 | -2.096106 | 0.734128  |
| 1 | -1.917876 | -2.933846 | 0.394009  |
| 1 | -1.918304 | -1.300054 | 0.292523  |
| 1 | -1.657047 | -2.039295 | 1.727168  |
| 7 | 2.900932  | 0.910641  | 0.431964  |
| 1 | 3.005169  | 1.844645  | 0.810576  |
| 1 | 2.139611  | 0.930464  | -0.240989 |
| 1 | 3.750567  | 0.697011  | -0.078034 |
| 7 | 1.648620  | -1.995789 | -0.067118 |
| 1 | 0.708346  | -2.134720 | 0.303673  |
| 1 | 2.147014  | -1.369134 | 0.558602  |
| 1 | 2.125247  | -2.889954 | -0.061048 |

-----

Cartesian coordinates of : MP2\_AM6\_15

-----

Atomic number (AN) and Cartesian coordinates

| AN | X         | Y         | Z         |
|----|-----------|-----------|-----------|
| 7  | 2.174862  | -1.746266 | -0.958659 |
| 1  | 3.039288  | -2.277514 | -0.962061 |
| 1  | 1.599183  | -2.138406 | -1.696513 |
| 1  | 1.698342  | -1.949043 | -0.076776 |
| 7  | 0.398586  | -2.064357 | 1.615343  |
| 1  | 0.664952  | -1.598348 | 2.475590  |
| 1  | -0.110284 | -2.900062 | 1.881273  |
| 1  | -0.245893 | -1.446109 | 1.113212  |
| 7  | 2.552913  | 1.407263  | -0.889350 |
| 1  | 2.382982  | 1.771552  | -1.820875 |
| 1  | 2.444990  | 0.391321  | -0.940353 |
| 1  | 3.529693  | 1.591183  | -0.686096 |
| 7  | 0.378126  | 2.431299  | 1.178089  |
| 1  | 1.148616  | 2.169818  | 0.559637  |
| 1  | 0.679383  | 2.274454  | 2.133264  |
| 1  | 0.226003  | 3.428636  | 1.078753  |
| 7  | -1.091946 | -0.051095 | -0.199426 |
| 1  | -2.068611 | 0.012567  | -0.478391 |
| 1  | -0.538056 | -0.107901 | -1.047646 |
| 1  | -0.831720 | 0.824430  | 0.254456  |
| 7  | -4.340081 | 0.014570  | -0.714254 |
| 1  | -4.818962 | -0.114570 | -1.597836 |
| 1  | -4.688679 | 0.874184  | -0.306374 |
| 1  | -4.618452 | -0.746091 | -0.105473 |

-----

Cartesian coordinates of : MP2\_AM6\_16

-----

Atomic number (AN) and Cartesian coordinates

| AN | X         | Y         | Z         |
|----|-----------|-----------|-----------|
| 7  | 3.062451  | 1.194749  | 0.317558  |
| 1  | 3.700249  | 1.413374  | -0.440497 |
| 1  | 3.387601  | 1.719287  | 1.122748  |
| 1  | 2.148337  | 1.576461  | 0.061775  |
| 7  | 0.159887  | 2.284257  | -0.348380 |
| 1  | -0.427512 | 1.573856  | 0.099610  |
| 1  | -0.173204 | 2.379334  | -1.302167 |
| 1  | -0.035426 | 3.169384  | 0.107790  |
| 7  | 0.418701  | -1.257304 | -1.579045 |

|   |           |           |           |
|---|-----------|-----------|-----------|
| 1 | 1.122866  | -1.645276 | -0.949402 |
| 1 | 0.780714  | -0.370151 | -1.912099 |
| 1 | 0.346531  | -1.870532 | -2.383132 |
| 7 | 2.527864  | -1.900904 | 0.665334  |
| 1 | 2.781782  | -0.910857 | 0.646154  |
| 1 | 3.384621  | -2.441818 | 0.631128  |
| 1 | 2.095901  | -2.093537 | 1.562092  |
| 7 | -1.429916 | -0.152278 | 0.754813  |
| 1 | -1.146512 | -0.577052 | 1.630840  |
| 1 | -1.004788 | -0.694657 | 0.002404  |
| 1 | -2.440800 | -0.249203 | 0.686164  |
| 7 | -4.666041 | -0.226738 | 0.217124  |
| 1 | -5.229155 | 0.388805  | 0.792235  |
| 1 | -5.144469 | -1.118863 | 0.172452  |
| 1 | -4.657356 | 0.158964  | -0.719918 |

-----

Cartesian coordinates of : MP2\_AM6\_17

-----

Atomic number (AN) and Cartesian coordinates

| AN | X         | Y         | Z         |
|----|-----------|-----------|-----------|
| 7  | 0.163232  | -0.658890 | 1.968250  |
| 1  | 1.042203  | -1.024605 | 2.317266  |
| 1  | -0.325429 | -0.262650 | 2.763702  |
| 1  | 0.379431  | 0.105211  | 1.330528  |
| 7  | 0.565384  | 1.717854  | -0.243042 |
| 1  | -0.458360 | 1.775807  | -0.278261 |
| 1  | 0.902203  | 1.827277  | -1.195563 |
| 1  | 0.885533  | 2.544343  | 0.253913  |
| 7  | -2.548359 | 1.599407  | -0.271519 |
| 1  | -3.106441 | 2.018492  | 0.464727  |
| 1  | -2.622491 | 0.582564  | -0.172662 |
| 1  | -2.996400 | 1.850654  | -1.146468 |
| 7  | -2.253446 | -1.478198 | -0.005728 |
| 1  | -2.928880 | -2.216656 | 0.156418  |
| 1  | -1.563226 | -1.512191 | 0.742694  |
| 1  | -1.746207 | -1.701490 | -0.858342 |
| 7  | 3.496287  | 0.282534  | -0.108322 |
| 1  | 4.071055  | 0.582685  | 0.669657  |
| 1  | 3.546301  | -0.727394 | -0.157550 |
| 1  | 2.534990  | 0.543876  | 0.086555  |
| 7  | 0.541012  | -1.480664 | -1.476618 |
| 1  | 1.225885  | -1.384319 | -2.217533 |
| 1  | 0.838274  | -2.243785 | -0.879669 |
| 1  | 0.572786  | -0.632117 | -0.920565 |

-----

Cartesian coordinates of : MP2\_AM6\_18

-----

Atomic number (AN) and Cartesian coordinates

| AN | X         | Y         | Z         |
|----|-----------|-----------|-----------|
| 7  | 1.130920  | -0.364794 | 2.150849  |
| 1  | 1.692830  | -0.799802 | 2.873210  |
| 1  | 1.638560  | 0.445425  | 1.813862  |
| 1  | 1.063371  | -1.013066 | 1.369354  |
| 7  | -1.361915 | -0.034404 | 0.250158  |
| 1  | -2.355242 | -0.155133 | 0.066499  |
| 1  | -1.222245 | -0.010382 | 1.255910  |
| 1  | -0.872094 | -0.866259 | -0.066086 |
| 7  | -4.589333 | -0.055321 | -0.403527 |
| 1  | -5.196353 | -0.224310 | 0.390102  |
| 1  | -4.934147 | -0.622105 | -1.169480 |
| 1  | -4.702674 | 0.915418  | -0.671163 |
| 7  | 1.116033  | -2.133252 | -0.678035 |
| 1  | 1.612140  | -3.001618 | -0.507623 |
| 1  | 1.808497  | -1.420997 | -0.921041 |
| 1  | 0.540694  | -2.290090 | -1.498891 |
| 7  | 0.702065  | 2.245597  | -0.173547 |

|   |           |          |           |
|---|-----------|----------|-----------|
| 1 | 0.493054  | 2.915481 | -0.906677 |
| 1 | 0.660125  | 2.761953 | 0.699288  |
| 1 | -0.066660 | 1.567575 | -0.149180 |
| 7 | 3.038543  | 0.316913 | -1.067412 |
| 1 | 3.807813  | 0.331569 | -0.406412 |
| 1 | 2.359840  | 1.019729 | -0.764505 |
| 1 | 3.418306  | 0.623439 | -1.956569 |

-----

Cartesian coordinates of : MP2\_AM6\_19

-----

Atomic number (AN) and Cartesian coordinates

| AN | X         | Y         | Z         |
|----|-----------|-----------|-----------|
| 7  | -2.861546 | -0.578901 | -0.389076 |
| 1  | -2.168704 | -1.332007 | -0.339632 |
| 1  | -3.092069 | -0.457534 | -1.370344 |
| 1  | -3.708198 | -0.915484 | 0.058385  |
| 7  | -1.162634 | 0.888562  | 1.977867  |
| 1  | -1.074889 | 0.203494  | 2.719994  |
| 1  | -1.770418 | 0.493093  | 1.262211  |
| 1  | -1.637707 | 1.692298  | 2.372939  |
| 7  | -1.115386 | 2.123163  | -1.247565 |
| 1  | -0.668663 | 2.594648  | -0.469739 |
| 1  | -1.727868 | 1.413647  | -0.855300 |
| 1  | -1.691026 | 2.802424  | -1.731088 |
| 7  | 1.143734  | 0.035045  | -0.160108 |
| 1  | 0.700289  | 0.470120  | 0.646190  |
| 1  | 2.149811  | 0.165771  | -0.081472 |
| 1  | 0.824125  | 0.566504  | -0.965339 |
| 7  | -0.473389 | -2.587171 | -0.229905 |
| 1  | -0.274334 | -3.148108 | -1.051345 |
| 1  | -0.272212 | -3.173153 | 0.573220  |
| 1  | 0.191580  | -1.805407 | -0.218980 |
| 7  | 4.440211  | 0.142426  | -0.018131 |
| 1  | 4.876955  | 0.684403  | -0.754525 |
| 1  | 4.668730  | -0.831156 | -0.181135 |
| 1  | 4.877667  | 0.414585  | 0.854382  |

-----

Cartesian coordinates of : MP2\_AM6\_20

-----

Atomic number (AN) and Cartesian coordinates

| AN | X         | Y         | Z         |
|----|-----------|-----------|-----------|
| 7  | 4.375533  | 0.419113  | -0.105415 |
| 1  | 4.907013  | -0.442589 | -0.149935 |
| 1  | 4.487834  | 0.796167  | 0.828484  |
| 1  | 4.809899  | 1.070566  | -0.748778 |
| 7  | 1.118161  | 0.046596  | -0.154249 |
| 1  | 0.860741  | -0.917128 | -0.355307 |
| 1  | 2.128960  | 0.131983  | -0.238268 |
| 1  | 0.701527  | 0.612898  | -0.885935 |
| 7  | -0.561303 | -2.760853 | 0.018720  |
| 1  | -0.063111 | -3.404390 | 0.623439  |
| 1  | -1.260815 | -3.304680 | -0.474043 |
| 1  | -1.050956 | -2.091342 | 0.611123  |
| 7  | -1.999589 | -0.108145 | -1.535647 |
| 1  | -2.144484 | -0.373229 | -0.564291 |
| 1  | -1.381547 | -0.805641 | -1.936353 |
| 1  | -2.889471 | -0.181316 | -2.016473 |
| 7  | -1.627917 | 2.598898  | 0.117751  |
| 1  | -1.631535 | 1.919431  | -0.640625 |
| 1  | -0.661884 | 2.796743  | 0.352417  |
| 1  | -2.040814 | 3.457576  | -0.226768 |
| 7  | -1.436796 | -0.148063 | 1.681231  |
| 1  | -0.458753 | 0.022874  | 1.442331  |
| 1  | -1.485607 | -0.368545 | 2.670485  |
| 1  | -1.903625 | 0.747792  | 1.551763  |

-----

Cartesian coordinates of : MP2\_AM6\_21

-----  
Atomic number (AN) and Cartesian coordinates

| AN | X         | Y         | Z         |
|----|-----------|-----------|-----------|
| 7  | -0.411036 | -3.544774 | -0.616421 |
| 1  | 0.535431  | -3.857179 | -0.432536 |
| 1  | -0.665959 | -3.879250 | -1.538337 |
| 1  | -1.017792 | -4.006609 | 0.051027  |
| 7  | 0.059422  | -0.414109 | 0.281390  |
| 1  | 0.983615  | -0.480503 | 0.706354  |
| 1  | -0.185458 | -1.351326 | -0.034016 |
| 1  | -0.602296 | -0.160143 | 1.014103  |
| 7  | 3.213490  | 0.030038  | 1.062792  |
| 1  | 3.463554  | 0.502416  | 1.923982  |
| 1  | 3.036906  | 0.741395  | 0.354455  |
| 1  | 4.024793  | -0.503969 | 0.773391  |
| 7  | -2.529431 | 0.874524  | 1.798243  |
| 1  | -3.375535 | 0.393858  | 2.081393  |
| 1  | -2.640789 | 1.160612  | 0.826361  |
| 1  | -2.462795 | 1.712417  | 2.364591  |
| 7  | -2.104158 | 1.259172  | -1.332972 |
| 1  | -2.598544 | 0.682971  | -2.004880 |
| 1  | -1.265019 | 0.754821  | -1.046721 |
| 1  | -1.811641 | 2.096698  | -1.823425 |
| 7  | 1.792783  | 1.855832  | -1.104335 |
| 1  | 1.076553  | 1.181196  | -0.833437 |
| 1  | 1.912076  | 1.803320  | -2.109435 |
| 1  | 1.445405  | 2.784500  | -0.893744 |

-----

Cartesian coordinates of : MP2\_AM6\_22

-----  
Atomic number (AN) and Cartesian coordinates

| AN | X         | Y         | Z         |
|----|-----------|-----------|-----------|
| 7  | -2.185666 | -0.035661 | 0.940157  |
| 1  | -2.487759 | 0.029237  | 1.906317  |
| 1  | -3.019582 | 0.054826  | 0.363761  |
| 1  | -1.589254 | 0.773294  | 0.760387  |
| 7  | 0.019782  | 2.228696  | 0.369755  |
| 1  | 0.798152  | 1.587759  | 0.550122  |
| 1  | 0.140309  | 3.033564  | 0.974924  |
| 1  | 0.118943  | 2.567175  | -0.581086 |
| 7  | 2.185719  | 0.035795  | 0.940233  |
| 1  | 3.019642  | -0.054740 | 0.363855  |
| 1  | 1.589312  | -0.773176 | 0.760521  |
| 1  | 2.487797  | -0.029017 | 1.906403  |
| 7  | -0.019714 | -2.228612 | 0.369945  |
| 1  | -0.118839 | -2.567180 | -0.580867 |
| 1  | -0.798090 | -1.587657 | 0.550224  |
| 1  | -0.140266 | -3.033423 | 0.975185  |
| 7  | -4.668703 | 0.036832  | -1.223804 |
| 1  | -5.042861 | 0.936727  | -1.500887 |
| 1  | -5.455610 | -0.581976 | -1.067400 |
| 1  | -4.145698 | -0.330861 | -2.009855 |
| 7  | 4.668599  | -0.037028 | -1.223873 |
| 1  | 5.043411  | -0.936855 | -1.500294 |
| 1  | 5.455051  | 0.582504  | -1.068047 |
| 1  | 4.145219  | 0.329646  | -2.010150 |

-----

Cartesian coordinates of : MP2\_AM6\_23

-----  
Atomic number (AN) and Cartesian coordinates

| AN | X         | Y        | Z        |
|----|-----------|----------|----------|
| 7  | -1.120032 | 1.651460 | 0.327865 |

-----

|   |           |           |           |
|---|-----------|-----------|-----------|
| 1 | -1.699965 | 2.347283  | -0.128400 |
| 1 | -1.274520 | 1.757040  | 1.324874  |
| 1 | -1.479542 | 0.734284  | 0.062160  |
| 7 | -1.917075 | -1.353344 | -0.466523 |
| 1 | -0.947063 | -1.562609 | -0.216761 |
| 1 | -2.038553 | -1.631863 | -1.435091 |
| 1 | -2.512257 | -1.966206 | 0.082211  |
| 7 | 1.120031  | -1.651459 | 0.327868  |
| 1 | 1.274517  | -1.757039 | 1.324878  |
| 1 | 1.479541  | -0.734283 | 0.062163  |
| 1 | 1.699965  | -2.347282 | -0.128396 |
| 7 | 1.917076  | 1.353345  | -0.466520 |
| 1 | 2.512257  | 1.966206  | 0.082215  |
| 1 | 0.947063  | 1.562610  | -0.216760 |
| 1 | 2.038555  | 1.631864  | -1.435087 |
| 7 | -4.784037 | 0.062600  | 0.169691  |
| 1 | -4.836219 | 0.818746  | 0.840687  |
| 1 | -5.308665 | 0.340477  | -0.650341 |
| 1 | -3.812081 | -0.057715 | -0.096587 |
| 7 | 4.784038  | -0.062602 | 0.169688  |
| 1 | 4.836219  | -0.818747 | 0.840686  |
| 1 | 5.308663  | -0.340481 | -0.650344 |
| 1 | 3.812080  | 0.057714  | -0.096587 |

-----

Cartesian coordinates of ammonia heptamer: (NH3)7

Cartesian coordinates of : MP2\_AM7\_1

-----

Atomic number (AN) and Cartesian coordinates

| AN | X         | Y         | Z         |
|----|-----------|-----------|-----------|
| 7  | 2.821503  | -1.251282 | -0.226265 |
| 1  | 2.736331  | -0.303126 | 0.148803  |
| 1  | 3.299757  | -1.190100 | -1.119058 |
| 1  | 3.436030  | -1.772125 | 0.390698  |
| 7  | 0.000005  | -1.341010 | 1.613079  |
| 1  | 0.000007  | -2.022729 | 2.364789  |
| 1  | 0.815345  | -1.535319 | 1.035487  |
| 1  | -0.815334 | -1.535323 | 1.035488  |
| 7  | -0.000002 | -0.982290 | -1.845757 |
| 1  | -0.821273 | -1.286201 | -1.325920 |
| 1  | 0.821272  | -1.286200 | -1.325921 |
| 1  | -0.000002 | -1.490641 | -2.723794 |
| 7  | -1.827794 | 1.355673  | 1.101098  |
| 1  | -1.238191 | 0.771442  | 1.688035  |
| 1  | -2.223550 | 2.085028  | 1.683658  |
| 1  | -1.209703 | 1.802785  | 0.427119  |
| 7  | -0.000010 | 2.133193  | -1.499358 |
| 1  | -0.811861 | 2.550783  | -1.942808 |
| 1  | 0.811834  | 2.550789  | -1.942814 |
| 1  | -0.000007 | 1.136262  | -1.736344 |
| 7  | -2.821501 | -1.251285 | -0.226263 |
| 1  | -3.436018 | -1.772137 | 0.390702  |
| 1  | -3.299765 | -1.190095 | -1.119049 |
| 1  | -2.736328 | -0.303132 | 0.148814  |
| 7  | 1.827797  | 1.355681  | 1.101085  |
| 1  | 1.209700  | 1.802789  | 0.427109  |
| 1  | 1.238201  | 0.771452  | 1.688030  |
| 1  | 2.223557  | 2.085040  | 1.683638  |

-----

Cartesian coordinates of : MP2\_AM7\_2

-----

Atomic number (AN) and Cartesian coordinates

| AN | X         | Y        | Z         |
|----|-----------|----------|-----------|
| 7  | 0.489115  | 0.029494 | -2.078444 |
| 1  | -0.043773 | 0.809958 | -1.689465 |

|   |           |           |           |
|---|-----------|-----------|-----------|
| 1 | 0.458158  | 0.114245  | -3.089276 |
| 1 | 1.453186  | 0.183746  | -1.799136 |
| 7 | 2.374318  | 1.524615  | 0.193279  |
| 1 | 1.597521  | 1.360743  | 0.836154  |
| 1 | 3.125397  | 1.963727  | 0.714830  |
| 1 | 2.061292  | 2.198722  | -0.496971 |
| 7 | 0.079424  | 0.236460  | 1.908837  |
| 1 | 0.599083  | -0.602764 | 1.656600  |
| 1 | -0.833045 | 0.171819  | 1.465894  |
| 1 | -0.076180 | 0.213657  | 2.911057  |
| 7 | -1.025340 | -2.260197 | -0.512089 |
| 1 | -1.297802 | -3.061439 | -1.071275 |
| 1 | -0.379117 | -2.596372 | 0.194559  |
| 1 | -0.498358 | -1.621362 | -1.112307 |
| 7 | -3.031258 | -0.125833 | 0.499082  |
| 1 | -3.777954 | 0.024663  | -0.171683 |
| 1 | -3.481617 | -0.382006 | 1.371663  |
| 1 | -2.492718 | -0.936639 | 0.179153  |
| 7 | -1.118511 | 2.274851  | -0.463434 |
| 1 | -1.804131 | 1.617693  | -0.090342 |
| 1 | -1.624047 | 3.086016  | -0.803675 |
| 1 | -0.562053 | 2.582368  | 0.327265  |
| 7 | 2.234180  | -1.694252 | 0.456099  |
| 1 | 2.027129  | -2.165734 | -0.417703 |
| 1 | 3.068475  | -2.127925 | 0.836656  |
| 1 | 2.467061  | -0.729075 | 0.224696  |

-----

Cartesian coordinates of : MP2\_AM7\_3

-----

Atomic number (AN) and Cartesian coordinates

| AN | X         | Y         | Z         |
|----|-----------|-----------|-----------|
| 7  | -0.352090 | 0.418144  | 1.879527  |
| 1  | -1.233477 | 0.623385  | 1.412744  |
| 1  | -0.544914 | 0.410487  | 2.875777  |
| 1  | -0.091185 | -0.531436 | 1.619466  |
| 7  | 1.265364  | -2.290210 | 0.980775  |
| 1  | 1.749607  | -1.765376 | 0.247300  |
| 1  | 1.331605  | -3.275907 | 0.749041  |
| 1  | 1.785850  | -2.165822 | 1.842993  |
| 7  | 2.306986  | -0.429437 | -1.302554 |
| 1  | 3.150096  | -0.513192 | -1.860087 |
| 1  | 2.321889  | 0.484485  | -0.852041 |
| 1  | 1.521433  | -0.409539 | -1.945138 |
| 7  | 1.908894  | 2.136816  | 0.609877  |
| 1  | 2.795871  | 2.035126  | 1.092392  |
| 1  | 1.196926  | 1.647961  | 1.161699  |
| 1  | 1.686689  | 3.126745  | 0.628521  |
| 7  | -1.400450 | -1.692013 | -0.912882 |
| 1  | -0.996941 | -0.924564 | -1.446725 |
| 1  | -0.699633 | -1.980534 | -0.234135 |
| 1  | -1.554563 | -2.471224 | -1.542797 |
| 7  | -0.538983 | 1.333823  | -1.543269 |
| 1  | 0.295885  | 1.637197  | -1.048559 |
| 1  | -1.313106 | 1.403294  | -0.886781 |
| 1  | -0.709308 | 2.006257  | -2.283503 |
| 7  | -3.218933 | 0.503003  | 0.272620  |
| 1  | -2.854688 | -0.387482 | -0.075363 |
| 1  | -3.789000 | 0.312337  | 1.089692  |
| 1  | -3.844558 | 0.876915  | -0.433166 |

-----

Cartesian coordinates of : MP2\_AM7\_4

-----

Atomic number (AN) and Cartesian coordinates

| AN | X        | Y         | Z        |
|----|----------|-----------|----------|
| 7  | 2.286791 | -1.527582 | 0.585002 |
| 1  | 2.298151 | -1.070010 | 1.490208 |



|   |           |           |           |
|---|-----------|-----------|-----------|
| 1 | 2.885040  | -2.343692 | 0.655037  |
| 1 | 1.330843  | -1.848319 | 0.436477  |
| 7 | -3.349395 | -0.269617 | 0.025110  |
| 1 | -2.740025 | 0.537245  | -0.116121 |
| 1 | -3.661121 | -0.266405 | 0.989696  |
| 1 | -4.174104 | -0.143159 | -0.550861 |
| 7 | -1.096347 | 1.802836  | -0.798370 |
| 1 | -0.877478 | 1.198413  | -1.585533 |
| 1 | -0.201093 | 1.988203  | -0.344182 |
| 1 | -1.420274 | 2.684714  | -1.182793 |
| 7 | 1.751979  | 1.902960  | 0.743790  |
| 1 | 2.071757  | 2.688357  | 1.300406  |
| 1 | 2.578477  | 1.416529  | 0.413040  |
| 1 | 1.256291  | 1.259151  | 1.361483  |
| 7 | -0.699571 | -1.915905 | -0.558757 |
| 1 | -0.765057 | -2.862202 | -0.920153 |
| 1 | -0.251211 | -1.347637 | -1.276425 |
| 1 | -1.655716 | -1.574221 | -0.450982 |
| 7 | -0.345821 | -0.017912 | 2.074927  |
| 1 | -0.480068 | -0.757313 | 1.386189  |
| 1 | -0.565245 | -0.404954 | 2.986627  |
| 1 | -1.044610 | 0.689333  | 1.870908  |
| 7 | 1.450334  | 0.000100  | -2.101713 |
| 1 | 1.537598  | 1.005964  | -2.001422 |
| 1 | 1.938438  | -0.414980 | -1.307918 |
| 1 | 1.953607  | -0.259175 | -2.943601 |

-----

Cartesian coordinates of : MP2\_AM7\_5

-----

Atomic number (AN) and Cartesian coordinates

| AN | X         | Y         | Z         |
|----|-----------|-----------|-----------|
| 7  | -3.354345 | 0.754120  | -0.370482 |
| 1  | -4.085020 | 0.420246  | -0.989294 |
| 1  | -3.797608 | 1.383638  | 0.289276  |
| 1  | -2.994996 | -0.047951 | 0.152423  |
| 7  | -1.616574 | -1.414847 | 1.032127  |
| 1  | -1.049612 | -0.739644 | 1.540832  |
| 1  | -1.032016 | -1.787753 | 0.287697  |
| 1  | -1.835688 | -2.179045 | 1.661159  |
| 7  | -0.119084 | 1.333363  | 1.645327  |
| 1  | -0.889833 | 1.920618  | 1.945524  |
| 1  | -0.123538 | 1.327562  | 0.627278  |
| 1  | 0.736854  | 1.793885  | 1.935427  |
| 7  | -0.414992 | 0.693902  | -1.584186 |
| 1  | -0.373800 | 0.916856  | -2.574198 |
| 1  | -1.382302 | 0.858300  | -1.297834 |
| 1  | -0.252787 | -0.309389 | -1.501739 |
| 7  | 2.300566  | -0.852799 | 1.085642  |
| 1  | 3.106528  | -1.141426 | 1.629569  |
| 1  | 1.546569  | -0.664856 | 1.739276  |
| 1  | 2.525953  | 0.040496  | 0.646743  |
| 7  | 2.419739  | 1.819868  | -0.648262 |
| 1  | 1.495731  | 1.564189  | -1.001196 |
| 1  | 3.078504  | 1.738324  | -1.415101 |
| 1  | 2.389560  | 2.802323  | -0.398164 |
| 7  | 0.745988  | -2.365754 | -1.140850 |
| 1  | 0.604168  | -3.348697 | -0.932256 |
| 1  | 1.390538  | -1.989132 | -0.439775 |
| 1  | 1.213704  | -2.333513 | -2.040861 |

-----

Cartesian coordinates of : MP2\_AM7\_6

-----

Atomic number (AN) and Cartesian coordinates

| AN | X        | Y         | Z         |
|----|----------|-----------|-----------|
| 7  | 3.066076 | -1.296751 | -0.094386 |
| 1  | 3.227529 | -2.054240 | 0.560587  |

|   |           |           |           |
|---|-----------|-----------|-----------|
| 1 | 3.804380  | -1.355682 | -0.787424 |
| 1 | 2.179039  | -1.482248 | -0.572015 |
| 7 | -1.668848 | -2.010595 | 1.132667  |
| 1 | -1.450741 | -1.105886 | 1.556537  |
| 1 | -1.037167 | -2.698716 | 1.528523  |
| 1 | -2.601428 | -2.267810 | 1.438744  |
| 7 | -1.184913 | 1.021569  | 1.749025  |
| 1 | -1.849128 | 1.134411  | 0.984011  |
| 1 | -0.272972 | 1.320555  | 1.415202  |
| 1 | -1.458091 | 1.649817  | 2.496445  |
| 7 | 2.086414  | 1.438671  | 1.068718  |
| 1 | 2.792819  | 2.163894  | 0.991845  |
| 1 | 2.504487  | 0.570599  | 0.720254  |
| 1 | 1.933453  | 1.303637  | 2.063464  |
| 7 | 0.259591  | -1.451717 | -1.422269 |
| 1 | 0.059741  | -1.948694 | -2.283730 |
| 1 | 0.120535  | -0.459961 | -1.605462 |
| 1 | -0.450332 | -1.728965 | -0.745820 |
| 7 | -2.768458 | 0.442091  | -0.901978 |
| 1 | -1.980302 | 0.702458  | -1.487622 |
| 1 | -2.644695 | -0.535917 | -0.657366 |
| 1 | -3.613860 | 0.521495  | -1.455232 |
| 7 | 0.167652  | 1.828470  | -1.514849 |
| 1 | 0.774083  | 2.143856  | -2.265125 |
| 1 | 0.745929  | 1.740610  | -0.677518 |
| 1 | -0.485879 | 2.584620  | -1.336789 |

-----  
 Cartesian coordinates of : MP2\_AM7\_7

-----  
 Atomic number (AN) and Cartesian coordinates

| AN | X         | Y         | Z         |
|----|-----------|-----------|-----------|
| 7  | -0.314353 | 1.038790  | -1.828254 |
| 1  | -0.409020 | 1.640314  | -2.638709 |
| 1  | 0.312721  | 1.497234  | -1.171998 |
| 1  | -1.228032 | 0.974279  | -1.389442 |
| 7  | -2.833078 | 1.447248  | 0.384651  |
| 1  | -1.996525 | 1.259969  | 0.943527  |
| 1  | -3.633156 | 1.455069  | 1.008217  |
| 1  | -2.750189 | 2.385680  | 0.008757  |
| 7  | -0.149581 | 0.435025  | 1.592220  |
| 1  | 0.584795  | 0.963053  | 1.123144  |
| 1  | -0.094936 | -0.508755 | 1.218701  |
| 1  | 0.105062  | 0.382109  | 2.573009  |
| 7  | 0.443428  | -1.906923 | -0.952517 |
| 1  | 0.686219  | -2.668932 | -1.577675 |
| 1  | 0.354036  | -1.063215 | -1.519872 |
| 1  | -0.497897 | -2.097714 | -0.607363 |
| 7  | -2.555278 | -1.768064 | 0.179576  |
| 1  | -2.685293 | -1.873737 | 1.180049  |
| 1  | -3.281584 | -2.316643 | -0.267833 |
| 1  | -2.734581 | -0.788495 | -0.035016 |
| 7  | 2.340835  | 1.846911  | -0.032775 |
| 1  | 2.735017  | 0.925669  | 0.177304  |
| 1  | 2.791096  | 2.520620  | 0.578181  |
| 1  | 2.628003  | 2.083908  | -0.977018 |
| 7  | 3.068795  | -1.129544 | 0.587037  |
| 1  | 3.833583  | -1.619690 | 0.135155  |
| 1  | 2.198212  | -1.473379 | 0.170777  |
| 1  | 3.077090  | -1.421455 | 1.558541  |

-----  
 Cartesian coordinates of : MP2\_AM7\_8

-----  
 Atomic number (AN) and Cartesian coordinates

| AN | X        | Y         | Z        |
|----|----------|-----------|----------|
| 7  | 0.347664 | -1.571135 | 1.050781 |
| 1  | 0.688845 | -2.361971 | 1.587187 |

|   |           |           |           |
|---|-----------|-----------|-----------|
| 1 | 0.771472  | -0.737411 | 1.448364  |
| 1 | 0.729146  | -1.658544 | 0.109500  |
| 7 | 3.417815  | 0.529416  | 0.244428  |
| 1 | 2.622756  | 0.811166  | 0.818876  |
| 1 | 3.863161  | 1.379996  | -0.083304 |
| 1 | 4.084825  | 0.076391  | 0.860156  |
| 7 | 0.754631  | 1.635652  | 1.682527  |
| 1 | 0.012225  | 1.385781  | 2.327811  |
| 1 | 0.350624  | 1.627518  | 0.739580  |
| 1 | 1.012149  | 2.592113  | 1.903091  |
| 7 | -0.265555 | 1.174510  | -1.190483 |
| 1 | -1.285274 | 1.200090  | -1.249208 |
| 1 | 0.021534  | 0.204588  | -1.286713 |
| 1 | 0.095106  | 1.667898  | -2.000352 |
| 7 | 1.919276  | -1.382003 | -1.767006 |
| 1 | 1.764875  | -0.980204 | -2.685370 |
| 1 | 2.429130  | -2.246369 | -1.914898 |
| 1 | 2.525401  | -0.748172 | -1.241496 |
| 7 | -3.414245 | 1.048433  | -0.965350 |
| 1 | -3.324887 | 0.260460  | -0.319987 |
| 1 | -4.047865 | 0.769326  | -1.706028 |
| 1 | -3.864055 | 1.808435  | -0.467316 |
| 7 | -2.813137 | -1.419085 | 0.916864  |
| 1 | -3.156955 | -1.400960 | 1.871234  |
| 1 | -1.791712 | -1.461772 | 0.967013  |
| 1 | -3.125641 | -2.298864 | 0.519532  |

-----  
 Cartesian coordinates of : MP2\_AM7\_9

-----  
 Atomic number (AN) and Cartesian coordinates

| AN | X         | Y         | Z         |
|----|-----------|-----------|-----------|
| 7  | 0.754629  | -1.635660 | -1.682519 |
| 1  | 1.012147  | -2.592122 | -1.903079 |
| 1  | 0.012223  | -1.385792 | -2.327803 |
| 1  | 0.350624  | -1.627522 | -0.739571 |
| 7  | -0.265555 | -1.174504 | 1.190489  |
| 1  | 0.021533  | -0.204582 | 1.286715  |
| 1  | 0.095104  | -1.667888 | 2.000362  |
| 1  | -1.285274 | -1.200085 | 1.249213  |
| 7  | 0.347664  | 1.571131  | -1.050786 |
| 1  | 0.688845  | 2.361964  | -1.587196 |
| 1  | 0.771471  | 0.737404  | -1.448366 |
| 1  | 0.729148  | 1.658544  | -0.109507 |
| 7  | -2.813137 | 1.419087  | -0.916865 |
| 1  | -3.125638 | 2.298864  | -0.519528 |
| 1  | -1.791712 | 1.461771  | -0.967016 |
| 1  | -3.156956 | 1.400967  | -1.871235 |
| 7  | -3.414248 | -1.048432 | 0.965348  |
| 1  | -3.324889 | -0.260460 | 0.319984  |
| 1  | -4.047872 | -0.769325 | 1.706023  |
| 1  | -3.864053 | -1.808436 | 0.467314  |
| 7  | 3.417816  | -0.529417 | -0.244428 |
| 1  | 3.863163  | -1.379996 | 0.083307  |
| 1  | 4.084825  | -0.076395 | -0.860160 |
| 1  | 2.622756  | -0.811170 | -0.818874 |
| 7  | 1.919279  | 1.382010  | 1.767000  |
| 1  | 1.764877  | 0.980213  | 2.685365  |
| 1  | 2.429135  | 2.246375  | 1.914889  |
| 1  | 2.525403  | 0.748177  | 1.241492  |

-----  
 Cartesian coordinates of : MP2\_AM7\_10

-----  
 Atomic number (AN) and Cartesian coordinates

| AN | X        | Y        | Z         |
|----|----------|----------|-----------|
| 7  | 1.775661 | 2.301139 | 0.419385  |
| 1  | 2.250969 | 3.062509 | -0.055565 |

|   |           |           |           |
|---|-----------|-----------|-----------|
| 1 | 1.817532  | 2.522858  | 1.409550  |
| 1 | 0.786027  | 2.360874  | 0.152994  |
| 7 | -1.158193 | 2.171100  | -0.565137 |
| 1 | -0.935372 | 1.422026  | -1.216538 |
| 1 | -1.630577 | 2.902232  | -1.085470 |
| 1 | -1.828133 | 1.796860  | 0.107743  |
| 7 | 0.623458  | -0.188509 | -1.838421 |
| 1 | 0.654955  | -1.006977 | -1.235546 |
| 1 | 1.235983  | 0.502451  | -1.415896 |
| 1 | 1.023061  | -0.449260 | -2.733159 |
| 7 | 3.169813  | -0.566174 | 0.658485  |
| 1 | 3.789589  | -0.517556 | 1.460161  |
| 1 | 2.763398  | 0.363410  | 0.533028  |
| 1 | 3.758116  | -0.746241 | -0.148233 |
| 7 | -2.149332 | -1.644794 | -0.707951 |
| 1 | -1.893627 | -1.013167 | -1.460541 |
| 1 | -2.731508 | -2.372632 | -1.107770 |
| 1 | -1.277521 | -2.075861 | -0.406141 |
| 7 | 0.703326  | -2.522452 | 0.619428  |
| 1 | 1.539622  | -1.940887 | 0.719298  |
| 1 | 1.017258  | -3.485341 | 0.552548  |
| 1 | 0.185887  | -2.447872 | 1.489590  |
| 7 | -3.079854 | 0.518420  | 1.393683  |
| 1 | -2.754465 | 0.312815  | 2.331486  |
| 1 | -4.087108 | 0.619542  | 1.448709  |
| 1 | -2.878240 | -0.290896 | 0.803448  |

-----

Cartesian coordinates of : MP2\_AM7\_11

-----

Atomic number (AN) and Cartesian coordinates

| AN | X         | Y         | Z         |
|----|-----------|-----------|-----------|
| 7  | 1.776806  | 1.999339  | -0.637833 |
| 1  | 2.274552  | 2.868224  | -0.479022 |
| 1  | 2.212774  | 1.542407  | -1.431040 |
| 1  | 1.917570  | 1.398477  | 0.170198  |
| 7  | -1.097677 | 1.718848  | 0.804445  |
| 1  | -1.894968 | 1.384026  | 0.260685  |
| 1  | -0.412668 | 2.087547  | 0.147232  |
| 1  | -1.434985 | 2.503163  | 1.353373  |
| 7  | -3.530819 | 0.376878  | -0.815766 |
| 1  | -3.525847 | 0.271581  | -1.824135 |
| 1  | -4.491693 | 0.556434  | -0.546415 |
| 1  | -3.250638 | -0.515234 | -0.405445 |
| 7  | 1.199707  | -0.162862 | 1.812531  |
| 1  | 0.915415  | -1.127263 | 1.669127  |
| 1  | 1.402730  | -0.063876 | 2.802423  |
| 1  | 0.372166  | 0.408824  | 1.614419  |
| 7  | -1.979899 | -1.845973 | 0.680174  |
| 1  | -1.177515 | -1.702117 | 0.065053  |
| 1  | -2.013121 | -2.823954 | 0.943463  |
| 1  | -1.825604 | -1.303023 | 1.522339  |
| 7  | 0.219608  | -0.978244 | -1.420142 |
| 1  | 0.017222  | 0.015344  | -1.360241 |
| 1  | 1.232295  | -1.072384 | -1.351570 |
| 1  | -0.049095 | -1.277572 | -2.351757 |
| 7  | 3.291903  | -1.087538 | -0.462261 |
| 1  | 4.118967  | -0.526169 | -0.631166 |
| 1  | 2.843439  | -0.735687 | 0.382289  |
| 1  | 3.611607  | -2.031888 | -0.277843 |

-----

Cartesian coordinates of : MP2\_AM7\_12

-----

Atomic number (AN) and Cartesian coordinates

| AN | X         | Y        | Z        |
|----|-----------|----------|----------|
| 7  | -3.408616 | 1.741963 | 0.022034 |
| 1  | -3.731701 | 0.774649 | 0.001318 |

|   |           |           |           |
|---|-----------|-----------|-----------|
| 1 | -3.799279 | 2.181975  | 0.847486  |
| 1 | -3.805347 | 2.218975  | -0.779624 |
| 7 | -3.504299 | -1.432885 | -0.055501 |
| 1 | -3.705894 | -1.970445 | -0.890930 |
| 1 | -2.503594 | -1.230479 | -0.044388 |
| 1 | -3.712839 | -2.030501 | 0.736239  |
| 7 | 2.138058  | 0.438991  | -2.141215 |
| 1 | 3.071475  | 0.248634  | -2.490758 |
| 1 | 1.656876  | 0.942646  | -2.879045 |
| 1 | 2.233668  | 1.076755  | -1.347212 |
| 7 | 2.095702  | 2.114965  | 0.516829  |
| 1 | 1.240082  | 2.658648  | 0.556139  |
| 1 | 1.976606  | 1.319005  | 1.145134  |
| 1 | 2.829732  | 2.700083  | 0.901076  |
| 7 | 1.482271  | -2.238294 | -0.487268 |
| 1 | 1.682713  | -1.502943 | -1.165473 |
| 1 | 1.818775  | -3.115571 | -0.868081 |
| 1 | 0.471040  | -2.301731 | -0.424421 |
| 7 | 1.892254  | -0.640004 | 2.151349  |
| 1 | 1.235916  | -1.002036 | 2.835547  |
| 1 | 1.899019  | -1.293574 | 1.363504  |
| 1 | 2.807090  | -0.680448 | 2.588779  |
| 7 | -0.709146 | 0.012371  | -0.015511 |
| 1 | -0.111143 | 0.101341  | 0.800552  |
| 1 | -1.364933 | 0.793196  | -0.007544 |
| 1 | -0.091839 | 0.132069  | -0.813314 |

-----

Cartesian coordinates of : MP2\_AM7\_13

-----

Atomic number (AN) and Cartesian coordinates

| AN | X         | Y         | Z         |
|----|-----------|-----------|-----------|
| 7  | 1.201946  | 1.988294  | -0.388903 |
| 1  | 1.328952  | 2.850572  | -0.905831 |
| 1  | 0.286780  | 2.011926  | 0.052807  |
| 1  | 1.185099  | 1.219409  | -1.052154 |
| 7  | -2.194825 | 0.860833  | -1.566083 |
| 1  | -1.902715 | 1.179070  | -0.641458 |
| 1  | -3.131810 | 1.212885  | -1.731775 |
| 1  | -1.593196 | 1.303076  | -2.252569 |
| 7  | -1.315790 | 0.922680  | 1.479948  |
| 1  | -1.530629 | 1.539093  | 2.257352  |
| 1  | -0.447773 | 0.440983  | 1.715214  |
| 1  | -2.044643 | 0.209337  | 1.451964  |
| 7  | 1.728888  | -0.196096 | 1.818089  |
| 1  | 1.953935  | -0.149348 | 2.806453  |
| 1  | 1.895220  | 0.724481  | 1.414257  |
| 1  | 2.417936  | -0.805605 | 1.380877  |
| 7  | 0.318909  | -1.152486 | -0.997826 |
| 1  | 0.415955  | -1.062538 | 0.011567  |
| 1  | 0.298533  | -2.143776 | -1.213751 |
| 1  | -0.586748 | -0.770209 | -1.258007 |
| 7  | 3.489863  | -0.960737 | -0.699244 |
| 1  | 3.889818  | -0.029724 | -0.728121 |
| 1  | 2.558640  | -0.911186 | -1.106975 |
| 1  | 4.060075  | -1.555259 | -1.289297 |
| 7  | -3.145948 | -1.479881 | 0.439949  |
| 1  | -2.615963 | -2.337869 | 0.542979  |
| 1  | -2.893427 | -1.065535 | -0.453843 |
| 1  | -4.125340 | -1.738033 | 0.398804  |

-----

Cartesian coordinates of : MP2\_AM7\_14

-----

Atomic number (AN) and Cartesian coordinates

| AN | X         | Y         | Z         |
|----|-----------|-----------|-----------|
| 7  | -1.275288 | -0.884927 | -1.325226 |
| 1  | -0.491202 | -1.504267 | -1.112913 |

|   |           |           |           |
|---|-----------|-----------|-----------|
| 1 | -1.464847 | -0.974726 | -2.317942 |
| 1 | -2.095005 | -1.224335 | -0.822772 |
| 7 | -3.733666 | -0.864391 | 0.739401  |
| 1 | -3.485579 | 0.121662  | 0.662857  |
| 1 | -3.531187 | -1.164282 | 1.686356  |
| 1 | -4.736813 | -0.942254 | 0.616052  |
| 7 | -2.442381 | 1.892534  | -0.209054 |
| 1 | -1.934090 | 1.196397  | -0.753928 |
| 1 | -1.748591 | 2.499596  | 0.213903  |
| 1 | -2.980696 | 2.462460  | -0.852321 |
| 7 | 0.238215  | 0.650663  | 1.100062  |
| 1 | 0.954546  | 0.014187  | 1.434319  |
| 1 | -0.218609 | 0.191139  | 0.314274  |
| 1 | -0.454037 | 0.742182  | 1.835708  |
| 7 | 1.284484  | -2.545616 | -0.348761 |
| 1 | 2.008859  | -1.910417 | -0.009333 |
| 1 | 1.019585  | -3.141364 | 0.428535  |
| 1 | 1.718126  | -3.150465 | -1.038154 |
| 7 | 3.552231  | -0.460532 | 0.580180  |
| 1 | 3.308052  | 0.435593  | 0.152463  |
| 1 | 3.830312  | -0.263126 | 1.536092  |
| 1 | 4.386209  | -0.797460 | 0.110314  |
| 7 | 2.338760  | 2.218554  | -0.568096 |
| 1 | 1.532262  | 1.970018  | 0.006600  |
| 1 | 2.613658  | 3.166120  | -0.334914 |
| 1 | 2.032559  | 2.229351  | -1.534736 |

-----

Cartesian coordinates of : MP2\_AM7\_15

-----

Atomic number (AN) and Cartesian coordinates

| AN | X         | Y         | Z         |
|----|-----------|-----------|-----------|
| 7  | 3.285793  | 0.551316  | 0.975574  |
| 1  | 3.387709  | 1.107709  | 1.817967  |
| 1  | 4.204215  | 0.169616  | 0.774703  |
| 1  | 2.681795  | -0.239255 | 1.209549  |
| 7  | 0.705398  | -1.606389 | -1.615478 |
| 1  | 1.456843  | -1.197710 | -2.160082 |
| 1  | 0.149665  | -0.839106 | -1.238210 |
| 1  | 0.121349  | -2.126441 | -2.260778 |
| 7  | -0.584324 | 0.659142  | 0.189528  |
| 1  | -0.027301 | 1.333628  | -0.336558 |
| 1  | -0.007668 | 0.382916  | 0.979035  |
| 1  | -1.400920 | 1.137441  | 0.570075  |
| 7  | 1.410545  | -1.989029 | 1.414020  |
| 1  | 0.521673  | -2.005848 | 1.902805  |
| 1  | 1.916988  | -2.815793 | 1.712607  |
| 1  | 1.206607  | -2.091728 | 0.418312  |
| 7  | 1.776039  | 2.187366  | -1.287361 |
| 1  | 2.370951  | 1.697178  | -0.616491 |
| 1  | 1.929889  | 3.182573  | -1.169074 |
| 1  | 2.095560  | 1.953416  | -2.220655 |
| 7  | -3.048920 | -1.127400 | -0.759023 |
| 1  | -3.000481 | -2.112720 | -0.526707 |
| 1  | -2.132013 | -0.715123 | -0.587516 |
| 1  | -3.241312 | -1.064300 | -1.752181 |
| 7  | -3.597151 | 1.378736  | 1.109715  |
| 1  | -3.970920 | 1.221464  | 2.038635  |
| 1  | -3.741985 | 0.529705  | 0.564844  |
| 1  | -4.152309 | 2.116186  | 0.690897  |

-----

Cartesian coordinates of : MP2\_AM7\_16

-----

Atomic number (AN) and Cartesian coordinates

| AN | X         | Y         | Z        |
|----|-----------|-----------|----------|
| 7  | -2.540873 | -1.471989 | 0.723212 |
| 1  | -3.406599 | -1.969042 | 0.540008 |

|   |           |           |           |
|---|-----------|-----------|-----------|
| 1 | -2.416994 | -1.472673 | 1.730574  |
| 1 | -2.693671 | -0.499061 | 0.445165  |
| 7 | 2.665498  | 1.601717  | -0.360467 |
| 1 | 3.587123  | 2.002601  | -0.223343 |
| 1 | 2.699641  | 0.638687  | -0.022270 |
| 1 | 2.516890  | 1.550901  | -1.363443 |
| 7 | 0.054336  | -3.109200 | -0.360365 |
| 1 | -0.059301 | -4.107797 | -0.223275 |
| 1 | 0.084625  | -2.955052 | -1.363335 |
| 1 | -0.796739 | -2.657261 | -0.022146 |
| 7 | 2.545287  | -1.464396 | 0.723146  |
| 1 | 3.408587  | -1.965632 | 0.539894  |
| 1 | 1.779073  | -2.083185 | 0.445188  |
| 1 | 2.484023  | -1.356726 | 1.730508  |
| 7 | -0.004413 | 2.936346  | 0.723315  |
| 1 | -0.002018 | 3.934686  | 0.540509  |
| 1 | 0.914580  | 2.582325  | 0.445169  |
| 1 | -0.066980 | 2.829002  | 1.730633  |
| 7 | -2.719839 | 1.507556  | -0.360523 |
| 1 | -1.902925 | 2.018658  | -0.022301 |
| 1 | -3.527834 | 2.105280  | -0.223504 |
| 1 | -2.601450 | 1.404190  | -1.363483 |
| 7 | -0.000005 | -0.000023 | -1.212811 |
| 1 | -0.810115 | -0.464584 | -0.816295 |
| 1 | 0.002728  | 0.933894  | -0.816437 |
| 1 | 0.807425  | -0.469286 | -0.816365 |

-----

Cartesian coordinates of : MP2\_AM7\_17

-----

Atomic number (AN) and Cartesian coordinates

| AN | X         | Y         | Z         |
|----|-----------|-----------|-----------|
| 7  | -0.223343 | 1.794266  | -1.411613 |
| 1  | 0.242870  | 2.518939  | -1.946644 |
| 1  | -0.920298 | 1.375940  | -2.018767 |
| 1  | 0.459428  | 1.063610  | -1.205361 |
| 7  | 1.530089  | -0.464907 | -0.034884 |
| 1  | 1.093654  | -0.002003 | 0.760492  |
| 1  | 2.540903  | -0.400524 | 0.072515  |
| 1  | 1.282324  | -1.446395 | 0.034158  |
| 7  | -0.409912 | 1.457643  | 1.770315  |
| 1  | -0.097735 | 2.223106  | 2.358084  |
| 1  | -1.361777 | 1.239057  | 2.045358  |
| 1  | -0.455809 | 1.798588  | 0.810115  |
| 7  | -3.148846 | 0.528115  | -0.079835 |
| 1  | -2.682497 | -0.004885 | -0.814098 |
| 1  | -2.815269 | 1.483111  | -0.157382 |
| 1  | -4.141961 | 0.540980  | -0.285483 |
| 7  | -1.233878 | -1.447998 | -1.715156 |
| 1  | -1.206236 | -1.826331 | -0.767896 |
| 1  | -1.474376 | -2.202584 | -2.348847 |
| 1  | -0.285123 | -1.160799 | -1.933128 |
| 7  | 4.790401  | -0.167042 | 0.045463  |
| 1  | 5.306776  | -1.035073 | -0.038460 |
| 1  | 5.167838  | 0.328293  | 0.845045  |
| 1  | 4.997604  | 0.386561  | -0.777729 |
| 7  | -1.440039 | -1.727070 | 1.441508  |
| 1  | -2.169186 | -1.043796 | 1.241295  |
| 1  | -1.820755 | -2.420583 | 2.075874  |
| 1  | -0.711678 | -1.226272 | 1.940277  |

-----

Cartesian coordinates of : MP2\_AM7\_18

-----

Atomic number (AN) and Cartesian coordinates

| AN | X        | Y        | Z         |
|----|----------|----------|-----------|
| 7  | 2.696841 | 0.484997 | -0.931839 |
| 1  | 2.709595 | 0.650896 | 0.074037  |

|   |           |           |           |
|---|-----------|-----------|-----------|
| 1 | 3.653485  | 0.488534  | -1.267012 |
| 1 | 2.318901  | -0.445788 | -1.083186 |
| 7 | 1.180894  | -2.103070 | 1.320709  |
| 1 | 1.093724  | -2.072902 | 0.305000  |
| 1 | 0.669452  | -2.918920 | 1.640085  |
| 1 | 2.158897  | -2.272815 | 1.531200  |
| 7 | 0.451653  | -1.766302 | -1.823511 |
| 1 | 0.057991  | -2.631460 | -2.178538 |
| 1 | 0.747188  | -1.230020 | -2.632742 |
| 1 | -0.302215 | -1.242398 | -1.366589 |
| 7 | -1.383263 | -0.165512 | 0.061664  |
| 1 | -2.388775 | -0.063761 | 0.183735  |
| 1 | -1.008385 | -0.575104 | 0.911521  |
| 1 | -0.980471 | 0.766871  | -0.017464 |
| 7 | -4.658960 | 0.078063  | 0.202697  |
| 1 | -5.144475 | -0.365537 | 0.973726  |
| 1 | -4.972493 | 1.041085  | 0.166772  |
| 1 | -4.970431 | -0.373580 | -0.649302 |
| 7 | 0.293707  | 2.504338  | -0.763477 |
| 1 | 0.658776  | 3.396222  | -0.445972 |
| 1 | -0.255181 | 2.697201  | -1.594549 |
| 1 | 1.095759  | 1.936126  | -1.044066 |
| 7 | 1.574536  | 1.007498  | 1.950519  |
| 1 | 1.661175  | 1.340350  | 2.903753  |
| 1 | 0.851702  | 1.555248  | 1.493675  |
| 1 | 1.257922  | 0.039676  | 1.978582  |

-----

Cartesian coordinates of : MP2\_AM7\_19

-----

Atomic number (AN) and Cartesian coordinates

| AN | X         | Y         | Z         |
|----|-----------|-----------|-----------|
| 7  | 0.445489  | -2.156046 | -0.177567 |
| 1  | 1.197803  | -2.683282 | -0.608238 |
| 1  | 0.108115  | -2.714505 | 0.599877  |
| 1  | 0.856602  | -1.309983 | 0.220477  |
| 7  | 1.588073  | 0.739493  | 0.563126  |
| 1  | 2.587470  | 0.649074  | 0.385832  |
| 1  | 1.470927  | 1.532560  | 1.185416  |
| 1  | 1.129557  | 0.975700  | -0.318180 |
| 7  | 4.784686  | 0.281015  | 0.005360  |
| 1  | 5.402713  | 0.828492  | 0.593206  |
| 1  | 5.015496  | 0.499969  | -0.956966 |
| 1  | 5.015605  | -0.694138 | 0.156604  |
| 7  | -2.714603 | -1.503704 | -0.185809 |
| 1  | -2.887129 | -0.597612 | -0.611137 |
| 1  | -3.434510 | -2.140446 | -0.507122 |
| 1  | -1.818294 | -1.837132 | -0.531972 |
| 7  | -1.303774 | 0.232330  | 2.039894  |
| 1  | -1.335888 | 0.154918  | 3.050025  |
| 1  | -0.334449 | 0.127544  | 1.750519  |
| 1  | -1.833154 | -0.542636 | 1.643247  |
| 7  | -2.688377 | 1.856397  | -0.239833 |
| 1  | -2.249440 | 1.548295  | 0.631065  |
| 1  | -3.687383 | 1.908283  | -0.070082 |
| 1  | -2.378248 | 2.804678  | -0.424061 |
| 7  | -0.274872 | 0.586349  | -1.975299 |
| 1  | -0.283005 | 0.737315  | -2.977692 |
| 1  | -0.234140 | -0.415696 | -1.812996 |
| 1  | -1.165011 | 0.917776  | -1.606924 |

-----

Cartesian coordinates of : MP2\_AM7\_20

-----

Atomic number (AN) and Cartesian coordinates

| AN | X        | Y         | Z        |
|----|----------|-----------|----------|
| 7  | 0.654747 | -1.517640 | 2.050655 |
| 1  | 0.597785 | -2.508226 | 2.264740 |



|   |           |           |           |
|---|-----------|-----------|-----------|
| 1 | 0.999125  | -1.067329 | 2.892597  |
| 1 | 1.375747  | -1.405697 | 1.330097  |
| 7 | 2.530002  | -0.917916 | -0.358621 |
| 1 | 2.831232  | 0.053966  | -0.282562 |
| 1 | 1.817822  | -0.961225 | -1.085370 |
| 1 | 3.327646  | -1.452957 | -0.684302 |
| 7 | 2.842657  | 2.268841  | 0.025934  |
| 1 | 3.162298  | 2.679033  | 0.896033  |
| 1 | 1.823942  | 2.207072  | 0.062948  |
| 1 | 3.090724  | 2.915535  | -0.714185 |
| 7 | -0.080577 | 1.193676  | 0.060154  |
| 1 | -1.074682 | 1.402612  | 0.063760  |
| 1 | 0.062414  | 0.551383  | 0.835418  |
| 1 | 0.078903  | 0.626425  | -0.769175 |
| 7 | -3.462791 | 1.748109  | 0.069228  |
| 1 | -3.109723 | 2.699099  | 0.078349  |
| 1 | -3.963567 | 1.627330  | -0.804403 |
| 1 | -4.145440 | 1.682055  | 0.816336  |
| 7 | -0.190003 | -1.379148 | -2.174242 |
| 1 | -0.654086 | -0.986723 | -2.986772 |
| 1 | -0.901395 | -1.517451 | -1.452272 |
| 1 | 0.140179  | -2.297768 | -2.451630 |
| 7 | -2.118621 | -1.430848 | 0.325255  |
| 1 | -1.339840 | -1.415911 | 0.983917  |
| 1 | -2.809295 | -2.081891 | 0.682401  |
| 1 | -2.537689 | -0.504845 | 0.335526  |

-----

Cartesian coordinates of : MP2\_AM7\_21

-----

Atomic number (AN) and Cartesian coordinates

| AN | X         | Y         | Z         |
|----|-----------|-----------|-----------|
| 7  | 3.844179  | -0.486188 | 0.672289  |
| 1  | 4.545808  | 0.164302  | 1.008214  |
| 1  | 3.407953  | -0.074568 | -0.156565 |
| 1  | 4.338339  | -1.322231 | 0.380956  |
| 7  | 0.626854  | -2.194911 | -0.738043 |
| 1  | 0.624846  | -1.694679 | 0.150790  |
| 1  | 1.439827  | -2.801121 | -0.744880 |
| 1  | -0.189207 | -2.796598 | -0.752187 |
| 7  | 0.862171  | -0.095823 | 1.667408  |
| 1  | 0.745340  | 0.828329  | 1.257408  |
| 1  | 1.856746  | -0.316217 | 1.593759  |
| 1  | 0.644939  | -0.014964 | 2.655360  |
| 7  | -1.847308 | 0.053122  | -0.254352 |
| 1  | -1.519890 | -0.381920 | -1.110687 |
| 1  | -1.266123 | -0.323559 | 0.489457  |
| 1  | -2.808767 | -0.244318 | -0.101624 |
| 7  | 1.926635  | 0.622489  | -1.530325 |
| 1  | 2.085426  | 0.955515  | -2.474748 |
| 1  | 1.366268  | -0.226009 | -1.589683 |
| 1  | 1.366191  | 1.323464  | -1.049575 |
| 7  | -0.216987 | 2.666192  | -0.031566 |
| 1  | -0.260429 | 3.322605  | -0.803704 |
| 1  | -0.956286 | 1.971213  | -0.163976 |
| 1  | -0.431737 | 3.194986  | 0.807104  |
| 7  | -5.024659 | -0.555813 | 0.196900  |
| 1  | -5.507309 | -1.133442 | -0.481722 |
| 1  | -5.300257 | -0.882833 | 1.115727  |
| 1  | -5.377880 | 0.388570  | 0.094403  |

-----

Cartesian coordinates of : MP2\_AM7\_22

-----

Atomic number (AN) and Cartesian coordinates

| AN | X         | Y         | Z        |
|----|-----------|-----------|----------|
| 7  | -1.682641 | -0.690673 | 1.995436 |
| 1  | -2.231034 | -0.004281 | 1.468985 |

|   |           |           |           |
|---|-----------|-----------|-----------|
| 1 | -1.042670 | -0.179952 | 2.594642  |
| 1 | -2.316384 | -1.186587 | 2.613436  |
| 7 | 0.575140  | -0.361384 | -0.383223 |
| 1 | -0.017899 | -0.473860 | -1.200460 |
| 1 | 0.018432  | -0.700121 | 0.399379  |
| 1 | 1.367125  | -0.995594 | -0.497160 |
| 7 | -2.282284 | -2.104310 | -0.913907 |
| 1 | -1.596052 | -2.706283 | -1.355144 |
| 1 | -3.143262 | -2.636558 | -0.852446 |
| 1 | -1.961803 | -1.923374 | 0.034859  |
| 7 | 3.463472  | -1.747521 | -0.428992 |
| 1 | 3.749608  | -2.457859 | 0.235147  |
| 1 | 3.697494  | -0.836856 | -0.035233 |
| 1 | 4.025613  | -1.881043 | -1.261859 |
| 7 | 3.178578  | 1.210952  | 0.670175  |
| 1 | 3.145323  | 1.445605  | 1.655745  |
| 1 | 2.233257  | 0.980937  | 0.368416  |
| 1 | 3.466540  | 2.048161  | 0.176590  |
| 7 | -0.320056 | 2.689823  | -0.758477 |
| 1 | -0.036853 | 3.339787  | -0.034178 |
| 1 | -0.008581 | 3.075003  | -1.642858 |
| 1 | 0.174976  | 1.812313  | -0.605227 |
| 7 | -2.996650 | 1.001789  | -0.226443 |
| 1 | -3.901813 | 1.412660  | -0.425460 |
| 1 | -2.285423 | 1.684842  | -0.486133 |
| 1 | -2.885508 | 0.192331  | -0.833022 |

-----

Cartesian coordinates of : MP2\_AM7\_23

-----

Atomic number (AN) and Cartesian coordinates

| AN | X         | Y         | Z         |
|----|-----------|-----------|-----------|
| 7  | 2.191116  | -0.744386 | 1.474947  |
| 1  | 2.935807  | -0.951310 | 2.132224  |
| 1  | 2.463273  | -1.116164 | 0.565483  |
| 1  | 1.376351  | -1.282349 | 1.765763  |
| 7  | -0.597407 | -2.234794 | 1.043520  |
| 1  | -0.651671 | -1.433799 | 0.419681  |
| 1  | -1.520832 | -2.393791 | 1.429214  |
| 1  | -0.348929 | -3.049315 | 0.494087  |
| 7  | -0.339033 | 0.755154  | -0.109458 |
| 1  | 0.062154  | 1.416025  | -0.767951 |
| 1  | 0.391633  | 0.573153  | 0.575546  |
| 1  | -1.107925 | 1.228766  | 0.367725  |
| 7  | -3.234123 | 1.615659  | 0.898091  |
| 1  | -3.479560 | 0.904057  | 0.210797  |
| 1  | -3.574345 | 1.308318  | 1.802244  |
| 1  | -3.742907 | 2.461164  | 0.666048  |
| 7  | -2.976101 | -0.560340 | -1.410372 |
| 1  | -3.074777 | -1.566947 | -1.342839 |
| 1  | -3.156520 | -0.310883 | -2.376413 |
| 1  | -2.006823 | -0.327155 | -1.200623 |
| 7  | 2.172725  | -0.782762 | -1.692450 |
| 1  | 2.537104  | -1.062020 | -2.596084 |
| 1  | 1.160094  | -0.805051 | -1.751131 |
| 1  | 2.435400  | 0.187626  | -1.528964 |
| 7  | 2.849632  | 1.948765  | -0.130371 |
| 1  | 3.839175  | 2.164970  | -0.079633 |
| 1  | 2.353964  | 2.804011  | 0.095797  |
| 1  | 2.641673  | 1.269628  | 0.601683  |

-----

Cartesian coordinates of : MP2\_AM7\_24

-----

Atomic number (AN) and Cartesian coordinates

| AN | X         | Y        | Z         |
|----|-----------|----------|-----------|
| 7  | -1.087542 | 2.651607 | -0.504638 |
| 1  | -1.198895 | 2.621915 | -1.512119 |

|   |           |           |           |
|---|-----------|-----------|-----------|
| 1 | -1.480970 | 3.534017  | -0.196514 |
| 1 | -1.653865 | 1.898173  | -0.104563 |
| 7 | -2.306170 | 0.099549  | 0.795912  |
| 1 | -1.526546 | -0.461094 | 0.450016  |
| 1 | -3.172318 | -0.369732 | 0.538821  |
| 1 | -2.255877 | 0.092280  | 1.808980  |
| 7 | 0.225559  | -1.171896 | -0.704119 |
| 1 | 1.064326  | -1.640465 | -0.355185 |
| 1 | 0.535473  | -0.308462 | -1.139100 |
| 1 | -0.150942 | -1.754366 | -1.444866 |
| 7 | 2.991437  | -2.300792 | 0.375112  |
| 1 | 3.109104  | -2.359286 | 1.380570  |
| 1 | 3.445272  | -3.117989 | -0.017758 |
| 1 | 3.499958  | -1.475528 | 0.051594  |
| 7 | 4.004675  | 0.497902  | -0.627080 |
| 1 | 3.909007  | 0.667513  | -1.622430 |
| 1 | 4.835288  | 0.997408  | -0.328629 |
| 1 | 3.200431  | 0.926843  | -0.161558 |
| 7 | -5.157902 | -1.169392 | -0.236433 |
| 1 | -5.947170 | -0.961088 | 0.364081  |
| 1 | -5.299187 | -0.665684 | -1.104301 |
| 1 | -5.197671 | -2.159031 | -0.450790 |
| 7 | 1.453537  | 1.415478  | 0.950153  |
| 1 | 1.659535  | 1.921168  | 1.805492  |
| 1 | 1.047908  | 0.526037  | 1.225257  |
| 1 | 0.711970  | 1.930174  | 0.470661  |

-----

Cartesian coordinates of : MP2\_AM7\_25

-----

Atomic number (AN) and Cartesian coordinates

| AN | X         | Y         | Z         |
|----|-----------|-----------|-----------|
| 7  | -1.821748 | -1.586400 | -1.158822 |
| 1  | -2.511387 | -1.030917 | -0.652670 |
| 1  | -2.326153 | -2.189640 | -1.799696 |
| 1  | -1.297217 | -0.920346 | -1.720211 |
| 7  | -0.544575 | 1.560711  | 1.642654  |
| 1  | 0.257872  | 1.177156  | 1.126760  |
| 1  | -0.571935 | 1.074191  | 2.533610  |
| 1  | -0.327016 | 2.528794  | 1.858229  |
| 7  | 1.540337  | 0.189811  | -0.128351 |
| 1  | 1.111840  | 0.276573  | -1.044890 |
| 1  | 1.378779  | -0.768813 | 0.180890  |
| 1  | 2.543667  | 0.317979  | -0.239595 |
| 7  | 0.403491  | -2.679565 | 0.775128  |
| 1  | 0.747117  | -3.585688 | 0.476581  |
| 1  | -0.381997 | -2.430138 | 0.168589  |
| 1  | 0.040691  | -2.801122 | 1.714137  |
| 7  | -1.015685 | 1.479655  | -1.747896 |
| 1  | -1.962986 | 1.600308  | -2.088462 |
| 1  | -0.491170 | 2.305976  | -2.012949 |
| 1  | -1.058604 | 1.462785  | -0.732723 |
| 7  | 4.831336  | 0.446002  | -0.142385 |
| 1  | 5.059512  | -0.447315 | 0.278074  |
| 1  | 5.130020  | 1.170119  | 0.500283  |
| 1  | 5.392084  | 0.537216  | -0.981392 |
| 7  | -3.429782 | 0.514912  | 0.689837  |
| 1  | -2.559732 | 0.931907  | 1.024128  |
| 1  | -3.866596 | 0.042684  | 1.473807  |
| 1  | -4.050410 | 1.272408  | 0.426351  |

-----

Cartesian coordinates of : MP2\_AM7\_26

-----

Atomic number (AN) and Cartesian coordinates

| AN | X         | Y         | Z         |
|----|-----------|-----------|-----------|
| 7  | -3.133946 | -0.692089 | -1.205511 |
| 1  | -3.977547 | -0.139001 | -1.107284 |

|   |           |           |           |
|---|-----------|-----------|-----------|
| 1 | -2.940105 | -1.134218 | -0.308305 |
| 1 | -3.337532 | -1.423946 | -1.876646 |
| 7 | -0.000002 | -0.000023 | -0.814547 |
| 1 | 0.441334  | 0.839661  | -1.191383 |
| 1 | -0.947852 | -0.037663 | -1.191395 |
| 1 | 0.506526  | -0.802069 | -1.191378 |
| 7 | 0.967608  | 3.060083  | -1.205498 |
| 1 | 1.868381  | 3.514151  | -1.107275 |
| 1 | 0.487786  | 3.113272  | -0.308295 |
| 1 | 0.435577  | 3.602289  | -1.876645 |
| 7 | 2.166392  | -2.367999 | -1.205481 |
| 1 | 2.109291  | -3.375129 | -1.107264 |
| 1 | 2.452363  | -1.979048 | -0.308280 |
| 1 | 2.901952  | -2.178310 | -1.876638 |
| 7 | 2.217814  | -0.576836 | 1.427533  |
| 1 | 1.916051  | -0.889815 | 2.343126  |
| 1 | 1.399232  | -0.248725 | 0.917946  |
| 1 | 2.834390  | 0.215340  | 1.569083  |
| 7 | -0.609341 | 2.209109  | 1.427501  |
| 1 | -0.484228 | 1.336123  | 0.917938  |
| 1 | -1.603672 | 2.347054  | 1.569000  |
| 1 | -0.187458 | 2.104265  | 2.343115  |
| 7 | -1.608523 | -1.632246 | 1.427506  |
| 1 | -1.230833 | -2.562342 | 1.568988  |
| 1 | -1.728636 | -1.214472 | 2.343129  |
| 1 | -0.915047 | -1.087410 | 0.917939  |

-----

Cartesian coordinates of : MP2\_AM7\_27

-----

Atomic number (AN) and Cartesian coordinates

| AN | X         | Y         | Z         |
|----|-----------|-----------|-----------|
| 7  | 3.511455  | 0.322513  | 0.243157  |
| 1  | 3.373325  | -0.678970 | 0.102804  |
| 1  | 4.027001  | 0.441536  | 1.108904  |
| 1  | 4.118983  | 0.649872  | -0.500465 |
| 7  | 1.426464  | 2.930432  | -0.381375 |
| 1  | 2.063228  | 2.162468  | -0.191382 |
| 1  | 0.490186  | 2.545342  | -0.450036 |
| 1  | 1.669840  | 3.323284  | -1.282610 |
| 7  | 2.259926  | -2.575290 | -0.098867 |
| 1  | 1.409494  | -2.054895 | 0.107319  |
| 1  | 2.332673  | -3.334342 | 0.569072  |
| 1  | 2.150644  | -2.996854 | -1.014213 |
| 7  | -1.719851 | -2.121659 | -0.780686 |
| 1  | -0.957979 | -1.618744 | -0.325361 |
| 1  | -1.574539 | -3.112915 | -0.625233 |
| 1  | -1.635382 | -1.965242 | -1.779052 |
| 7  | -1.829728 | 2.050047  | -0.210451 |
| 1  | -2.587115 | 1.418147  | 0.060200  |
| 1  | -1.854626 | 2.846145  | 0.418848  |
| 1  | -2.061254 | 2.405004  | -1.132639 |
| 7  | -3.898615 | -0.229192 | 0.496901  |
| 1  | -3.322276 | -0.971190 | 0.095710  |
| 1  | -4.059089 | -0.460392 | 1.471247  |
| 1  | -4.803829 | -0.263154 | 0.040922  |
| 7  | 0.281819  | -0.200807 | 0.791914  |
| 1  | -0.346613 | 0.521470  | 0.436280  |
| 1  | 0.118776  | -0.245820 | 1.793619  |
| 1  | 1.228265  | 0.156931  | 0.671908  |

-----

Cartesian coordinates of : MP2\_AM7\_28

-----

Atomic number (AN) and Cartesian coordinates

| AN | X        | Y         | Z        |
|----|----------|-----------|----------|
| 7  | 0.478364 | -2.314964 | 0.484042 |
| 1  | 0.359359 | -3.303972 | 0.290600 |

|   |           |           |           |
|---|-----------|-----------|-----------|
| 1 | 0.173316  | -2.169708 | 1.441017  |
| 1 | 1.481411  | -2.116927 | 0.457481  |
| 7 | -1.895184 | -0.064006 | -0.250575 |
| 1 | -2.864566 | -0.307510 | -0.061235 |
| 1 | -1.308335 | -0.853958 | 0.005275  |
| 1 | -1.784366 | 0.038852  | -1.254461 |
| 7 | -5.084870 | -0.393732 | 0.501728  |
| 1 | -5.196185 | 0.564618  | 0.811432  |
| 1 | -5.347858 | -0.994589 | 1.274062  |
| 1 | -5.753659 | -0.552863 | -0.242675 |
| 7 | 0.775337  | -0.042376 | -2.033021 |
| 1 | 1.365543  | -0.368545 | -2.789629 |
| 1 | 0.622327  | -0.821468 | -1.397400 |
| 1 | 1.303439  | 0.646964  | -1.508381 |
| 7 | -0.172854 | 2.542158  | -0.149584 |
| 1 | -0.156934 | 2.701126  | -1.151915 |
| 1 | -0.594992 | 3.365349  | 0.267136  |
| 1 | -0.814491 | 1.757886  | -0.002739 |
| 7 | 2.502061  | 1.566362  | 1.170542  |
| 1 | 3.168546  | 2.331266  | 1.194748  |
| 1 | 2.273085  | 1.357151  | 2.136968  |
| 1 | 1.646884  | 1.930565  | 0.740410  |
| 7 | 3.434165  | -1.294902 | 0.192983  |
| 1 | 3.708783  | -1.314726 | -0.783009 |
| 1 | 4.254426  | -1.552857 | 0.730830  |
| 1 | 3.205125  | -0.326438 | 0.428682  |

-----  
 Cartesian coordinates of : MP2\_AM7\_29

-----  
 Atomic number (AN) and Cartesian coordinates

| AN | X         | Y         | Z         |
|----|-----------|-----------|-----------|
| 7  | -1.454585 | -1.546537 | -0.007731 |
| 1  | -1.914920 | -2.286160 | 0.511337  |
| 1  | -1.490868 | -1.813060 | -0.985654 |
| 1  | -2.017796 | -0.703550 | 0.098427  |
| 7  | -2.887108 | 1.325213  | 0.299499  |
| 1  | -3.539956 | 1.767107  | -0.340277 |
| 1  | -1.947322 | 1.640180  | 0.044987  |
| 1  | -3.087011 | 1.703607  | 1.219897  |
| 7  | 1.453810  | -0.593015 | 0.908616  |
| 1  | 1.512254  | -0.671064 | 1.919541  |
| 1  | 2.184947  | -1.196043 | 0.529249  |
| 1  | 0.552789  | -0.996272 | 0.642532  |
| 7  | 3.882790  | 1.345795  | -0.003967 |
| 1  | 3.705074  | 2.044341  | -0.716476 |
| 1  | 4.329531  | 1.821595  | 0.771735  |
| 1  | 2.983097  | 0.992953  | 0.317994  |
| 7  | -5.330987 | -0.742954 | -0.328079 |
| 1  | -5.133536 | -1.599553 | -0.830112 |
| 1  | -4.448338 | -0.347374 | -0.019304 |
| 1  | -5.876329 | -0.984229 | 0.490100  |
| 7  | 4.146773  | -1.779482 | -0.425799 |
| 1  | 4.898703  | -2.254599 | 0.060195  |
| 1  | 4.156765  | -2.115549 | -1.382002 |
| 1  | 4.360963  | -0.783236 | -0.440324 |
| 7  | 0.099131  | 1.968226  | -0.475289 |
| 1  | 0.519814  | 2.839999  | -0.172527 |
| 1  | 0.606970  | 1.209204  | -0.018943 |
| 1  | 0.276398  | 1.890975  | -1.471122 |

-----  
 Cartesian coordinates of : MP2\_AM7\_30

-----  
 Atomic number (AN) and Cartesian coordinates

| AN | X         | Y        | Z         |
|----|-----------|----------|-----------|
| 7  | -5.234147 | 0.214636 | -0.362163 |
| 1  | -5.769258 | 0.883758 | -0.902798 |

|   |           |           |           |
|---|-----------|-----------|-----------|
| 1 | -5.372695 | 0.433098  | 0.617320  |
| 1 | -5.634333 | -0.700398 | -0.532227 |
| 7 | -1.922907 | 0.172371  | -0.228551 |
| 1 | -1.446465 | 0.574697  | -1.031399 |
| 1 | -2.923192 | 0.191099  | -0.411527 |
| 1 | -1.628032 | -0.802710 | -0.184303 |
| 7 | 0.911646  | 1.192520  | -1.476282 |
| 1 | 0.872812  | 1.407215  | -0.483454 |
| 1 | 1.489163  | 1.885631  | -1.936779 |
| 1 | 1.364584  | 0.290719  | -1.569873 |
| 7 | 2.020754  | -0.886202 | 1.146156  |
| 1 | 2.875357  | -0.654194 | 0.643282  |
| 1 | 2.301705  | -1.263385 | 2.045085  |
| 1 | 1.529877  | -0.012296 | 1.326682  |
| 7 | -0.319412 | -2.638838 | -0.093055 |
| 1 | 0.499370  | -2.139939 | 0.261297  |
| 1 | -0.075718 | -3.035489 | -0.993866 |
| 1 | -0.493691 | -3.419231 | 0.530489  |
| 7 | 4.488378  | 0.252684  | -0.658161 |
| 1 | 5.405596  | 0.406099  | -0.254887 |
| 1 | 4.630444  | -0.131477 | -1.585352 |
| 1 | 4.051029  | 1.160321  | -0.769934 |
| 7 | -0.028703 | 1.649617  | 1.647697  |
| 1 | -0.808655 | 1.180229  | 1.170171  |
| 1 | -0.073248 | 1.400359  | 2.630554  |
| 1 | -0.203913 | 2.648386  | 1.602041  |

-----

Cartesian coordinates of ammonia octamer: (NH<sub>3</sub>)<sub>8</sub>

Cartesian coordinates of : MP2\_AM8\_1

-----

Atomic number (AN) and Cartesian coordinates

| AN | X         | Y         | Z         |
|----|-----------|-----------|-----------|
| 7  | -2.109504 | 1.726363  | 1.261954  |
| 1  | -3.067935 | 1.462392  | 1.466698  |
| 1  | -2.040322 | 2.717953  | 1.467270  |
| 1  | -1.966549 | 1.609821  | 0.253791  |
| 7  | -1.726176 | -2.108774 | -1.263200 |
| 1  | -2.717715 | -2.039302 | -1.468666 |
| 1  | -1.462345 | -3.067145 | -1.468405 |
| 1  | -1.609804 | -1.966380 | -0.254937 |
| 7  | 1.125441  | 1.375173  | 1.703012  |
| 1  | 1.494154  | 1.825752  | 2.533881  |
| 1  | 1.376005  | 0.390004  | 1.761470  |
| 1  | 0.110179  | 1.426298  | 1.761222  |
| 7  | 2.108586  | -1.726831 | 1.262704  |
| 1  | 2.039121  | -2.718481 | 1.467634  |
| 1  | 3.066912  | -1.463068 | 1.468204  |
| 1  | 1.966354  | -1.609927 | 0.254480  |
| 7  | 1.727100  | 2.109242  | -1.261454 |
| 1  | 2.718791  | 2.039848  | -1.466211 |
| 1  | 1.609979  | 1.966501  | -0.253327 |
| 1  | 1.463409  | 3.067680  | -1.466528 |
| 7  | -1.374845 | 1.126394  | -1.702733 |
| 1  | -0.389667 | 1.376983  | -1.760941 |
| 1  | -1.825319 | 1.495521  | -2.533475 |
| 1  | -1.425962 | 0.111162  | -1.761451 |
| 7  | 1.376054  | -1.125773 | -1.702266 |
| 1  | 1.427226  | -0.110523 | -1.760647 |
| 1  | 1.827031  | -1.494655 | -2.532845 |
| 1  | 0.390907  | -1.376324 | -1.761153 |
| 7  | -1.126643 | -1.375777 | 1.701985  |
| 1  | -1.377238 | -0.390629 | 1.760664  |
| 1  | -1.495891 | -1.826680 | 2.532440  |
| 1  | -0.111418 | -1.426924 | 1.760821  |

-----

Cartesian coordinates of : MP2\_AM8\_2

-----  
Atomic number (AN) and Cartesian coordinates

| AN | X         | Y         | Z         |
|----|-----------|-----------|-----------|
| 7  | 1.148330  | -2.084689 | 0.010668  |
| 1  | 1.283427  | -1.568777 | -0.856539 |
| 1  | 1.520234  | -3.017432 | -0.134688 |
| 1  | 0.144280  | -2.184349 | 0.144848  |
| 7  | -2.140586 | 2.187831  | 0.095339  |
| 1  | -3.059207 | 1.973050  | -0.278554 |
| 1  | -1.940402 | 1.512889  | 0.839789  |
| 1  | -2.211700 | 3.105988  | 0.521314  |
| 7  | 2.140591  | -0.095341 | 2.187823  |
| 1  | 2.211711  | -0.521316 | 3.105980  |
| 1  | 3.059210  | 0.278552  | 1.973037  |
| 1  | 1.940404  | -0.839790 | 1.512882  |
| 7  | -1.148332 | 0.010671  | 2.084686  |
| 1  | -1.520238 | -0.134685 | 3.017429  |
| 1  | -0.144283 | 0.144847  | 2.184347  |
| 1  | -1.283432 | -0.856536 | 1.568774  |
| 7  | -1.148335 | -0.010668 | -2.084684 |
| 1  | -0.144287 | -0.144849 | -2.184350 |
| 1  | -1.283428 | 0.856536  | -1.568764 |
| 1  | -1.520244 | 0.134698  | -3.017424 |
| 7  | -2.140593 | -2.187825 | -0.095338 |
| 1  | -1.940408 | -1.512885 | -0.839788 |
| 1  | -3.059212 | -1.973041 | 0.278557  |
| 1  | -2.211711 | -3.105983 | -0.521312 |
| 7  | 2.140588  | 0.095336  | -2.187825 |
| 1  | 1.940403  | 0.839786  | -1.512884 |
| 1  | 3.059207  | -0.278559 | -1.973040 |
| 1  | 2.211708  | 0.521311  | -3.105982 |
| 7  | 1.148337  | 2.084685  | -0.010671 |
| 1  | 1.520246  | 3.017426  | 0.134685  |
| 1  | 0.144288  | 2.184350  | -0.144849 |
| 1  | 1.283434  | 1.568773  | 0.856537  |

-----  
Cartesian coordinates of : MP2\_AM8\_3

-----  
Atomic number (AN) and Cartesian coordinates

| AN | X         | Y         | Z         |
|----|-----------|-----------|-----------|
| 7  | 2.726205  | -0.252264 | -1.539242 |
| 1  | 3.251620  | -0.573062 | -2.345672 |
| 1  | 3.197492  | 0.576754  | -1.192659 |
| 1  | 1.807392  | 0.042959  | -1.868701 |
| 7  | -2.610078 | 1.636695  | -0.372078 |
| 1  | -1.705056 | 1.942343  | -0.013281 |
| 1  | -3.143318 | 1.294033  | 0.420294  |
| 1  | -3.094770 | 2.458011  | -0.718401 |
| 7  | 0.502423  | 2.205780  | 0.098057  |
| 1  | 0.495761  | 1.732423  | -0.802961 |
| 1  | 1.279859  | 1.816497  | 0.633694  |
| 1  | 0.714379  | 3.183731  | -0.071419 |
| 7  | 2.513884  | 0.341319  | 1.696447  |
| 1  | 3.202512  | 0.372289  | 2.439794  |
| 1  | 2.864602  | -0.280701 | 0.974892  |
| 1  | 1.664266  | -0.076438 | 2.070104  |
| 7  | -0.421150 | 0.018111  | -2.185714 |
| 1  | -0.609148 | -0.178762 | -3.163463 |
| 1  | -1.250203 | 0.475693  | -1.808618 |
| 1  | -0.335504 | -0.875762 | -1.704228 |
| 7  | 0.566555  | -2.209660 | -0.050200 |
| 1  | 0.756246  | -3.185483 | 0.153650  |
| 1  | 0.385807  | -1.742575 | 0.836879  |
| 1  | 1.423772  | -1.808121 | -0.426719 |
| 7  | -0.644833 | -0.143185 | 2.194329  |
| 1  | -0.542288 | 0.761956  | 1.740743  |

|   |           |           |           |
|---|-----------|-----------|-----------|
| 1 | -0.867232 | 0.028281  | 3.169438  |
| 1 | -1.452653 | -0.603218 | 1.773132  |
| 7 | -2.634772 | -1.614962 | 0.203407  |
| 1 | -3.358700 | -2.324144 | 0.178208  |
| 1 | -2.898353 | -0.879176 | -0.444324 |
| 1 | -1.774118 | -2.030357 | -0.145429 |

-----

Cartesian coordinates of : MP2\_AM8\_4

-----

Atomic number (AN) and Cartesian coordinates

| AN | X         | Y         | Z         |
|----|-----------|-----------|-----------|
| 7  | 2.585607  | -1.399213 | 0.527472  |
| 1  | 2.130242  | -1.484784 | 1.430090  |
| 1  | 3.472018  | -1.888211 | 0.595251  |
| 1  | 2.789418  | -0.407156 | 0.399913  |
| 7  | -2.526985 | 1.897739  | 0.755969  |
| 1  | -2.925289 | 2.695244  | 0.271202  |
| 1  | -2.819629 | 1.051859  | 0.258870  |
| 1  | -2.958550 | 1.879350  | 1.674276  |
| 7  | 0.441885  | -1.509829 | -1.845906 |
| 1  | 0.814672  | -1.936376 | -2.688049 |
| 1  | -0.309901 | -2.108758 | -1.520551 |
| 1  | 1.173709  | -1.556082 | -1.134024 |
| 7  | -2.841945 | -0.758171 | -0.808469 |
| 1  | -2.242232 | -1.344383 | -0.225233 |
| 1  | -2.344568 | -0.601361 | -1.678763 |
| 1  | -3.674723 | -1.292143 | -1.031906 |
| 7  | 0.041492  | 1.629202  | -1.479343 |
| 1  | -0.232212 | 2.131833  | -2.316738 |
| 1  | -0.694118 | 1.770512  | -0.792058 |
| 1  | 0.065510  | 0.633727  | -1.707437 |
| 7  | 2.848102  | 1.709533  | -0.191866 |
| 1  | 1.962813  | 1.835515  | -0.693383 |
| 1  | 3.583350  | 1.644159  | -0.888529 |
| 1  | 3.026921  | 2.560416  | 0.331481  |
| 7  | 0.273180  | 0.669373  | 1.840622  |
| 1  | 1.066384  | 0.909292  | 1.251962  |
| 1  | -0.523318 | 1.202214  | 1.491375  |
| 1  | 0.484218  | 1.026004  | 2.767361  |
| 7  | -0.831037 | -2.226009 | 1.175183  |
| 1  | -0.058443 | -2.838846 | 0.936731  |
| 1  | -0.427848 | -1.333501 | 1.471316  |
| 1  | -1.290521 | -2.636894 | 1.981214  |

-----

Cartesian coordinates of : MP2\_AM8\_5

-----

Atomic number (AN) and Cartesian coordinates

| AN | X         | Y         | Z         |
|----|-----------|-----------|-----------|
| 7  | 0.727891  | 1.042596  | -1.919913 |
| 1  | 0.755717  | 1.354736  | -2.884506 |
| 1  | -0.047505 | 1.513519  | -1.458752 |
| 1  | 0.498907  | 0.050706  | -1.920833 |
| 7  | -2.744515 | 0.058998  | -1.492392 |
| 1  | -3.722413 | 0.083854  | -1.223106 |
| 1  | -2.708089 | 0.320639  | -2.471889 |
| 1  | -2.270251 | 0.789987  | -0.961783 |
| 7  | -1.191784 | 1.980157  | 0.578399  |
| 1  | -0.211561 | 1.999257  | 0.857919  |
| 1  | -1.586736 | 2.880561  | 0.830798  |
| 1  | -1.653735 | 1.274073  | 1.153786  |
| 7  | 2.088651  | 1.890905  | 0.789811  |
| 1  | 2.471789  | 2.830321  | 0.797423  |
| 1  | 1.903460  | 1.636497  | -0.181251 |
| 1  | 2.818180  | 1.272001  | 1.127245  |
| 7  | -2.293407 | -0.722350 | 1.776832  |
| 1  | -2.819665 | -1.075005 | 2.568443  |



|   |           |           |           |
|---|-----------|-----------|-----------|
| 1 | -2.667197 | -1.162490 | 0.942694  |
| 1 | -1.327409 | -1.032400 | 1.875652  |
| 7 | 0.919077  | -0.995371 | 1.942061  |
| 1 | 1.674154  | -1.154199 | 1.273085  |
| 1 | 1.204422  | -1.419668 | 2.819268  |
| 1 | 0.899898  | 0.010371  | 2.090609  |
| 7 | -0.312542 | -1.954473 | -1.016434 |
| 1 | -0.151703 | -1.907871 | -0.012688 |
| 1 | -0.450748 | -2.930256 | -1.258837 |
| 1 | -1.192947 | -1.471406 | -1.200248 |
| 7 | 2.815273  | -1.284399 | -0.625613 |
| 1 | 1.929493  | -1.571160 | -1.038565 |
| 1 | 3.080247  | -0.423181 | -1.091683 |
| 1 | 3.513182  | -1.981330 | -0.862032 |

-----

Cartesian coordinates of :     MP2\_AM8\_6

-----

Atomic number (AN) and Cartesian coordinates

| AN | X         | Y         | Z         |
|----|-----------|-----------|-----------|
| 7  | -3.712345 | -0.060334 | -0.356416 |
| 1  | -4.046132 | 0.098376  | -1.301306 |
| 1  | -3.215210 | 0.783757  | -0.059603 |
| 1  | -4.538341 | -0.146955 | 0.226395  |
| 7  | -1.789390 | 2.220548  | 0.526715  |
| 1  | -1.101623 | 1.629430  | 1.000479  |
| 1  | -2.048066 | 2.968377  | 1.161271  |
| 1  | -1.320923 | 2.651153  | -0.263197 |
| 7  | -0.219983 | 0.099480  | -1.713459 |
| 1  | -1.092797 | 0.048326  | -1.195978 |
| 1  | -0.459992 | 0.012295  | -2.695805 |
| 1  | 0.326629  | -0.726525 | -1.461573 |
| 7  | -1.615015 | -2.259840 | 0.559367  |
| 1  | -1.150440 | -2.635096 | -0.261315 |
| 1  | -2.063864 | -3.040641 | 1.026866  |
| 1  | -2.356328 | -1.641192 | 0.223790  |
| 7  | 3.712336  | -0.060363 | 0.356455  |
| 1  | 4.046118  | 0.098353  | 1.301345  |
| 1  | 3.215217  | 0.783733  | 0.059628  |
| 1  | 4.538335  | -0.147004 | -0.226349 |
| 7  | 1.789420  | 2.220536  | -0.526718 |
| 1  | 1.101648  | 1.629427  | -1.000487 |
| 1  | 1.320951  | 2.651152  | 0.263186  |
| 1  | 2.048114  | 2.968358  | -1.161275 |
| 7  | 1.614993  | -2.259836 | -0.559388 |
| 1  | 2.356308  | -1.641208 | -0.223781 |
| 1  | 2.063841  | -3.040652 | -1.026863 |
| 1  | 1.150366  | -2.635074 | 0.261273  |
| 7  | 0.219987  | 0.099464  | 1.713444  |
| 1  | 0.459986  | 0.012267  | 2.695791  |
| 1  | 1.092806  | 0.048310  | 1.195972  |
| 1  | -0.326627 | -0.726537 | 1.461546  |

-----

Cartesian coordinates of :     MP2\_AM8\_7

-----

Atomic number (AN) and Cartesian coordinates

| AN | X         | Y         | Z         |
|----|-----------|-----------|-----------|
| 7  | -0.153829 | 0.144893  | 1.672652  |
| 1  | -0.639435 | 0.030999  | 2.556332  |
| 1  | 0.187378  | -0.774248 | 1.396656  |
| 1  | -0.855663 | 0.422462  | 0.991974  |
| 7  | 1.727353  | -2.393103 | 0.871899  |
| 1  | 1.880075  | -3.351191 | 0.574723  |
| 1  | 2.108431  | -2.321083 | 1.809603  |
| 1  | 2.281295  | -1.784670 | 0.262888  |
| 7  | 2.918072  | -0.282044 | -1.084360 |
| 1  | 2.185397  | -0.239661 | -1.785678 |

|   |           |           |           |
|---|-----------|-----------|-----------|
| 1 | 2.843211  | 0.578952  | -0.543716 |
| 1 | 3.806244  | -0.264178 | -1.573648 |
| 7 | 0.066658  | 1.500382  | -1.538776 |
| 1 | 0.093794  | 2.108100  | -2.350858 |
| 1 | 0.848435  | 1.764209  | -0.945287 |
| 1 | -0.789642 | 1.715478  | -1.026228 |
| 7 | 2.223093  | 2.051868  | 1.017750  |
| 1 | 1.457974  | 1.485715  | 1.396178  |
| 1 | 3.020857  | 1.943447  | 1.635462  |
| 1 | 1.944251  | 3.025512  | 1.079844  |
| 7 | -2.731560 | 1.804027  | 0.035842  |
| 1 | -3.093890 | 0.856717  | 0.173443  |
| 1 | -3.304073 | 2.241462  | -0.678887 |
| 1 | -2.900714 | 2.322523  | 0.891656  |
| 7 | -0.697118 | -1.602645 | -1.300295 |
| 1 | -0.405131 | -0.657216 | -1.550646 |
| 1 | -0.639420 | -2.172075 | -2.137772 |
| 1 | -0.009559 | -1.962840 | -0.642886 |
| 7 | -3.361556 | -1.241322 | 0.287598  |
| 1 | -2.529614 | -1.464462 | -0.267451 |
| 1 | -3.266860 | -1.721214 | 1.176392  |
| 1 | -4.161143 | -1.657127 | -0.178266 |

-----

Cartesian coordinates of : MP2\_AM8\_8

-----

Atomic number (AN) and Cartesian coordinates

| AN | X         | Y         | Z         |
|----|-----------|-----------|-----------|
| 7  | -3.361598 | -1.241210 | -0.287671 |
| 1  | -4.161234 | -1.656998 | 0.178122  |
| 1  | -2.529709 | -1.464328 | 0.267467  |
| 1  | -3.266809 | -1.721125 | -1.176442 |
| 7  | -0.697246 | -1.602554 | 1.300336  |
| 1  | -0.009717 | -1.962799 | 0.642922  |
| 1  | -0.639554 | -2.171970 | 2.137825  |
| 1  | -0.405197 | -0.657138 | 1.550667  |
| 7  | 0.066769  | 1.500416  | 1.538795  |
| 1  | -0.789511 | 1.715508  | 1.026213  |
| 1  | 0.093909  | 2.108189  | 2.350836  |
| 1  | 0.848572  | 1.764176  | 0.945310  |
| 7  | -2.731462 | 1.804081  | -0.035847 |
| 1  | -3.303920 | 2.241487  | 0.678945  |
| 1  | -3.093845 | 0.856798  | -0.173504 |
| 1  | -2.900627 | 2.322657  | -0.891609 |
| 7  | -0.153775 | 0.144941  | -1.672617 |
| 1  | 0.187382  | -0.774210 | -1.396597 |
| 1  | -0.855662 | 0.422532  | -0.992003 |
| 1  | -0.639307 | 0.031056  | -2.556340 |
| 7  | 2.223232  | 2.051818  | -1.017759 |
| 1  | 3.020974  | 1.943392  | -1.635497 |
| 1  | 1.944409  | 3.025470  | -1.079820 |
| 1  | 1.458085  | 1.485690  | -1.396168 |
| 7  | 2.918032  | -0.282175 | 1.084288  |
| 1  | 3.806220  | -0.264372 | 1.573549  |
| 1  | 2.843219  | 0.578828  | 0.543647  |
| 1  | 2.185383  | -0.239731 | 1.785630  |
| 7  | 1.727156  | -2.393257 | -0.871837 |
| 1  | 2.108264  | -2.321376 | -1.809540 |
| 1  | 1.879768  | -3.351331 | -0.574559 |
| 1  | 2.281149  | -1.784821 | -0.262875 |

-----

Cartesian coordinates of : MP2\_AM8\_9

-----

Atomic number (AN) and Cartesian coordinates

| AN | X        | Y        | Z         |
|----|----------|----------|-----------|
| 7  | 0.616126 | 2.949532 | -0.150895 |
| 1  | 1.449404 | 2.385423 | -0.340657 |

|   |           |           |           |
|---|-----------|-----------|-----------|
| 1 | 0.420155  | 3.497166  | -0.982496 |
| 1 | 0.859388  | 3.615518  | 0.575291  |
| 7 | 1.557476  | -0.646449 | 1.947576  |
| 1 | 1.960411  | -0.488656 | 2.865474  |
| 1 | 1.321861  | -1.632217 | 1.895795  |
| 1 | 0.668600  | -0.146501 | 1.912333  |
| 7 | 2.826149  | 0.816406  | -0.558629 |
| 1 | 3.831005  | 0.950738  | -0.530302 |
| 1 | 2.622849  | 0.241197  | -1.369517 |
| 1 | 2.554935  | 0.273913  | 0.263894  |
| 7 | 1.443706  | -2.302207 | -1.161630 |
| 1 | 0.735444  | -2.433616 | -0.438452 |
| 1 | 2.332258  | -2.170687 | -0.690855 |
| 1 | 1.511239  | -3.166702 | -1.688126 |
| 7 | -1.261761 | 0.959932  | 1.596021  |
| 1 | -0.753751 | 1.665325  | 1.060403  |
| 1 | -2.141544 | 0.805647  | 1.100810  |
| 1 | -1.499938 | 1.378888  | 2.489912  |
| 7 | -0.587226 | 0.164006  | -1.796964 |
| 1 | 0.095067  | -0.591396 | -1.730460 |
| 1 | -0.509142 | 0.542778  | -2.735677 |
| 1 | -0.270830 | 0.894279  | -1.163281 |
| 7 | -1.109796 | -2.196776 | 0.683576  |
| 1 | -1.166671 | -1.254431 | 1.068721  |
| 1 | -1.591743 | -2.815086 | 1.327829  |
| 1 | -1.654023 | -2.180388 | -0.172940 |
| 7 | -3.491880 | 0.267727  | -0.558405 |
| 1 | -4.035013 | 0.997456  | -1.006400 |
| 1 | -2.643174 | 0.125863  | -1.109873 |
| 1 | -4.046344 | -0.579709 | -0.605973 |

-----

Cartesian coordinates of : MP2\_AM8\_10

-----

Atomic number (AN) and Cartesian coordinates

| AN | X         | Y         | Z         |
|----|-----------|-----------|-----------|
| 7  | -2.399591 | -0.169183 | -1.862516 |
| 1  | -2.805505 | 0.042510  | -0.952340 |
| 1  | -1.873567 | 0.648908  | -2.149748 |
| 1  | -3.157353 | -0.287575 | -2.525841 |
| 7  | 3.145467  | 1.050970  | 0.508506  |
| 1  | 4.127698  | 1.083971  | 0.256767  |
| 1  | 2.961770  | 1.879245  | 1.065070  |
| 1  | 2.596723  | 1.129447  | -0.351837 |
| 7  | -2.958210 | -0.115546 | 1.295000  |
| 1  | -2.578413 | 0.506112  | 2.000813  |
| 1  | -2.264638 | -0.847909 | 1.145059  |
| 1  | -3.785854 | -0.545829 | 1.693489  |
| 7  | -0.802110 | -2.178982 | 0.061140  |
| 1  | 0.205955  | -2.224519 | -0.097982 |
| 1  | -1.226254 | -1.747107 | -0.760294 |
| 1  | -1.135278 | -3.136999 | 0.102550  |
| 7  | 1.112873  | 0.927349  | -1.859867 |
| 1  | 0.748019  | -0.014206 | -1.965293 |
| 1  | 0.400115  | 1.461614  | -1.357973 |
| 1  | 1.192744  | 1.317916  | -2.792877 |
| 7  | -0.905464 | 2.307304  | 0.122578  |
| 1  | -0.777446 | 3.279465  | 0.383372  |
| 1  | -1.904571 | 2.128489  | 0.129049  |
| 1  | -0.504109 | 1.727657  | 0.863232  |
| 7  | 0.399065  | 0.141079  | 2.024334  |
| 1  | 1.376359  | 0.185009  | 1.746009  |
| 1  | 0.381609  | -0.013105 | 3.027043  |
| 1  | 0.001542  | -0.687282 | 1.584067  |
| 7  | 2.375635  | -1.983151 | -0.297145 |
| 1  | 2.925906  | -2.747799 | 0.079305  |
| 1  | 2.652898  | -1.135963 | 0.195119  |
| 1  | 2.667992  | -1.860936 | -1.260967 |

-----

Cartesian coordinates of : MP2\_AM8\_11

-----  
Atomic number (AN) and Cartesian coordinates

| AN | X         | Y         | Z         |
|----|-----------|-----------|-----------|
| 7  | -0.864454 | 0.063927  | -1.969268 |
| 1  | -1.252105 | 0.231521  | -2.891690 |
| 1  | -1.063076 | 0.882442  | -1.397787 |
| 1  | -1.390350 | -0.696091 | -1.546850 |
| 7  | -1.553971 | -1.934512 | 0.637692  |
| 1  | -1.390778 | -1.344278 | 1.449141  |
| 1  | -0.623809 | -2.119365 | 0.259825  |
| 1  | -1.916198 | -2.818987 | 0.979934  |
| 7  | 0.864468  | -0.063919 | 1.969271  |
| 1  | 1.390363  | 0.696095  | 1.546843  |
| 1  | 1.063100  | -0.882443 | 1.397806  |
| 1  | 1.252115  | -0.231493 | 2.891698  |
| 7  | 1.375647  | -1.904382 | -0.741506 |
| 1  | 2.298549  | -1.513545 | -0.548365 |
| 1  | 0.895351  | -1.253776 | -1.361805 |
| 1  | 1.523770  | -2.764940 | -1.258826 |
| 7  | -3.909789 | 0.130201  | -0.055004 |
| 1  | -4.217505 | 0.191151  | -1.018967 |
| 1  | -4.729437 | -0.080332 | 0.503393  |
| 1  | -3.268163 | -0.658785 | 0.020212  |
| 7  | -1.375652 | 1.904377  | 0.741496  |
| 1  | -2.298563 | 1.513557  | 0.548364  |
| 1  | -1.523753 | 2.764929  | 1.258832  |
| 1  | -0.895358 | 1.253755  | 1.361780  |
| 7  | 3.909774  | -0.130203 | 0.055021  |
| 1  | 4.217474  | -0.191157 | 1.018989  |
| 1  | 3.268174  | 0.658803  | -0.020209 |
| 1  | 4.729437  | 0.080301  | -0.503364 |
| 7  | 1.553975  | 1.934515  | -0.637703 |
| 1  | 0.623817  | 2.119376  | -0.259829 |
| 1  | 1.390771  | 1.344254  | -1.449131 |
| 1  | 1.916192  | 2.818981  | -0.979979 |

-----  
Cartesian coordinates of : MP2\_AM8\_12-----  
Atomic number (AN) and Cartesian coordinates

| AN | X         | Y         | Z         |
|----|-----------|-----------|-----------|
| 7  | -2.892881 | 1.676732  | 0.332882  |
| 1  | -3.329407 | 2.585531  | 0.226692  |
| 1  | -2.116498 | 1.617085  | -0.326087 |
| 1  | -2.489620 | 1.641009  | 1.263184  |
| 7  | -0.529520 | 0.765108  | -1.610382 |
| 1  | 0.477162  | 0.915715  | -1.688005 |
| 1  | -0.912454 | 0.793846  | -2.549627 |
| 1  | -0.663862 | -0.179325 | -1.257809 |
| 7  | -0.789669 | -1.583127 | 0.755034  |
| 1  | -1.775593 | -1.581047 | 0.487008  |
| 1  | -0.679470 | -2.329368 | 1.434631  |
| 1  | -0.599648 | -0.708123 | 1.243119  |
| 7  | -3.833359 | -1.258504 | -0.186770 |
| 1  | -4.105486 | -1.417370 | -1.150427 |
| 1  | -3.752764 | -0.250080 | -0.045161 |
| 1  | -4.595857 | -1.594404 | 0.390934  |
| 7  | 0.361373  | 1.362856  | 1.508610  |
| 1  | 0.096536  | 1.613460  | 0.560332  |
| 1  | 0.294292  | 2.199443  | 2.077815  |
| 1  | 1.338719  | 1.082535  | 1.486060  |
| 7  | 3.141393  | -0.380059 | 1.410092  |
| 1  | 4.146339  | -0.454026 | 1.529490  |
| 1  | 2.853773  | -1.085463 | 0.725850  |
| 1  | 2.726843  | -0.636551 | 2.300362  |
| 7  | 2.599388  | 1.364129  | -1.292357 |
| 1  | 2.619191  | 2.370741  | -1.166244 |

|   |          |           |           |
|---|----------|-----------|-----------|
| 1 | 3.375679 | 1.135012  | -1.904184 |
| 1 | 2.801390 | 0.945220  | -0.385490 |
| 7 | 1.869147 | -2.005370 | -0.892132 |
| 1 | 1.893633 | -1.370697 | -1.683409 |
| 1 | 0.933255 | -1.941918 | -0.483527 |
| 1 | 1.982745 | -2.943577 | -1.260345 |

-----

Cartesian coordinates of : MP2\_AM8\_13

-----

Atomic number (AN) and Cartesian coordinates

| AN | X         | Y         | Z         |
|----|-----------|-----------|-----------|
| 7  | 2.818915  | 1.866513  | -0.953377 |
| 1  | 3.373497  | 2.714206  | -0.910817 |
| 1  | 2.588277  | 1.716250  | -1.929145 |
| 1  | 1.948627  | 2.034284  | -0.443247 |
| 7  | -1.969850 | -1.613232 | -1.216555 |
| 1  | -2.476685 | -2.355742 | -1.686150 |
| 1  | -1.012769 | -1.939389 | -1.081055 |
| 1  | -2.383169 | -1.499333 | -0.295495 |
| 7  | 3.020899  | -0.729940 | 0.838802  |
| 1  | 3.881922  | -0.935452 | 1.333240  |
| 1  | 2.319431  | -0.486075 | 1.531658  |
| 1  | 3.178506  | 0.103541  | 0.270671  |
| 7  | 1.181263  | -2.381969 | -1.027967 |
| 1  | 1.399615  | -3.372455 | -1.073466 |
| 1  | 1.906887  | -1.941782 | -0.452880 |
| 1  | 1.301632  | -2.020361 | -1.969156 |
| 7  | -2.000701 | 1.481419  | -1.551265 |
| 1  | -2.732127 | 1.845558  | -2.152963 |
| 1  | -1.966987 | 0.466733  | -1.681602 |
| 1  | -1.126135 | 1.860846  | -1.899507 |
| 7  | 0.221380  | 2.033353  | 0.828240  |
| 1  | -0.664491 | 2.094698  | 0.334012  |
| 1  | 0.219597  | 2.752988  | 1.543228  |
| 1  | 0.230930  | 1.128856  | 1.300125  |
| 7  | -3.032757 | 0.336263  | 1.298364  |
| 1  | -2.844033 | 0.908596  | 2.114668  |
| 1  | -2.769272 | 0.883722  | 0.479273  |
| 1  | -4.038084 | 0.203660  | 1.264586  |
| 7  | -0.143999 | -1.014822 | 1.799933  |
| 1  | -0.005331 | -1.624460 | 2.599114  |
| 1  | 0.149611  | -1.532662 | 0.975130  |
| 1  | -1.145505 | -0.849319 | 1.716561  |

-----

Cartesian coordinates of : MP2\_AM8\_14

-----

Atomic number (AN) and Cartesian coordinates

| AN | X         | Y         | Z         |
|----|-----------|-----------|-----------|
| 7  | 0.071136  | 0.349755  | 1.800043  |
| 1  | -0.291196 | 0.335461  | 2.747678  |
| 1  | -0.294595 | -0.472874 | 1.328417  |
| 1  | -0.329711 | 1.165094  | 1.334434  |
| 7  | -0.335104 | -2.250932 | -0.211009 |
| 1  | -0.757091 | -2.955683 | -0.807641 |
| 1  | 0.522570  | -2.657194 | 0.149447  |
| 1  | -0.061628 | -1.472293 | -0.815716 |
| 7  | 0.587598  | 0.372460  | -1.691679 |
| 1  | 0.446039  | 1.058363  | -0.954943 |
| 1  | 1.577144  | 0.113598  | -1.683861 |
| 1  | 0.414492  | 0.851275  | -2.569969 |
| 7  | -1.276332 | 2.739747  | 0.128144  |
| 1  | -1.883385 | 2.144564  | -0.442547 |
| 1  | -1.871242 | 3.260103  | 0.764483  |
| 1  | -0.852477 | 3.425965  | -0.487553 |
| 7  | -3.179065 | -1.442638 | 1.060823  |
| 1  | -2.238028 | -1.780829 | 0.862854  |

|   |           |           |           |
|---|-----------|-----------|-----------|
| 1 | -3.140010 | -0.888652 | 1.908708  |
| 1 | -3.766118 | -2.245579 | 1.256375  |
| 7 | 3.567833  | -0.585556 | -1.327684 |
| 1 | 3.580966  | -0.330851 | -0.337133 |
| 1 | 3.726740  | -1.584892 | -1.393910 |
| 1 | 4.361703  | -0.136861 | -1.771331 |
| 7 | 3.215956  | 0.384479  | 1.639022  |
| 1 | 3.587350  | -0.127618 | 2.432150  |
| 1 | 3.521422  | 1.345359  | 1.752669  |
| 1 | 2.195744  | 0.382184  | 1.727417  |
| 7 | -2.688141 | 0.464610  | -1.441970 |
| 1 | -3.315039 | 0.437296  | -2.238569 |
| 1 | -3.076458 | -0.143429 | -0.720829 |
| 1 | -1.804366 | 0.054005  | -1.730466 |

-----

Cartesian coordinates of : MP2\_AM8\_15

-----

Atomic number (AN) and Cartesian coordinates

| AN | X         | Y         | Z         |
|----|-----------|-----------|-----------|
| 7  | 0.257369  | -0.282809 | -1.700993 |
| 1  | 0.018804  | -0.305723 | -2.687651 |
| 1  | 1.212680  | 0.062912  | -1.636048 |
| 1  | -0.340498 | 0.427506  | -1.275591 |
| 7  | 0.642439  | 0.125632  | 1.997320  |
| 1  | 0.810352  | 0.151747  | 2.998157  |
| 1  | 0.952108  | 1.021515  | 1.616199  |
| 1  | 1.266713  | -0.578123 | 1.612369  |
| 7  | 1.740466  | -2.501100 | 0.013305  |
| 1  | 1.072633  | -2.014348 | -0.585481 |
| 1  | 2.170823  | -3.239220 | -0.534029 |
| 1  | 1.213049  | -2.957927 | 0.749342  |
| 7  | -1.750257 | -1.651222 | 0.584286  |
| 1  | -1.188252 | -1.123683 | 1.250968  |
| 1  | -1.812435 | -2.606219 | 0.919840  |
| 1  | -1.209413 | -1.656953 | -0.276026 |
| 7  | -4.231231 | -0.028795 | -0.461587 |
| 1  | -4.550609 | -0.407568 | -1.345789 |
| 1  | -3.568167 | -0.690274 | -0.053674 |
| 1  | -5.039632 | 0.026129  | 0.147343  |
| 7  | 3.448106  | 0.126616  | -0.563301 |
| 1  | 3.829374  | 0.614544  | 0.241022  |
| 1  | 3.067564  | -0.755406 | -0.219448 |
| 1  | 4.233748  | -0.096886 | -1.165362 |
| 7  | 1.433978  | 2.560980  | 0.130260  |
| 1  | 0.518983  | 2.500241  | -0.308801 |
| 1  | 1.734921  | 3.528281  | 0.093919  |
| 1  | 2.082391  | 2.008720  | -0.424568 |
| 7  | -1.650525 | 1.757118  | 0.002846  |
| 1  | -1.826839 | 2.719674  | 0.273267  |
| 1  | -2.555755 | 1.352895  | -0.240845 |
| 1  | -1.324947 | 1.273215  | 0.835930  |

-----

Cartesian coordinates of : MP2\_AM8\_16

-----

Atomic number (AN) and Cartesian coordinates

| AN | X         | Y         | Z         |
|----|-----------|-----------|-----------|
| 7  | -3.299851 | -2.008019 | 0.095873  |
| 1  | -2.942073 | -1.399435 | -0.643734 |
| 1  | -3.132278 | -2.968578 | -0.182012 |
| 1  | -4.305802 | -1.888067 | 0.138379  |
| 7  | 2.293546  | 0.379870  | -1.732846 |
| 1  | 1.778003  | 1.186452  | -2.068885 |
| 1  | 2.826512  | 0.026386  | -2.520406 |
| 1  | 1.612787  | -0.334183 | -1.469318 |
| 7  | -1.403563 | 2.887465  | -0.090724 |
| 1  | -0.462295 | 2.719187  | 0.271918  |

|   |           |           |           |
|---|-----------|-----------|-----------|
| 1 | -1.324367 | 3.520036  | -0.879976 |
| 1 | -1.921756 | 3.389293  | 0.622920  |
| 7 | -1.453389 | -0.051907 | 1.749516  |
| 1 | -2.088733 | -0.795425 | 1.453878  |
| 1 | -1.641567 | 0.128679  | 2.730496  |
| 1 | -1.734090 | 0.778013  | 1.232865  |
| 7 | -1.687168 | 0.020120  | -1.661081 |
| 1 | -0.804806 | -0.413837 | -1.400148 |
| 1 | -1.722459 | 0.933365  | -1.210150 |
| 1 | -1.668726 | 0.174158  | -2.663157 |
| 7 | 3.663825  | -1.222676 | 0.714265  |
| 1 | 3.768729  | -0.787247 | 1.623562  |
| 1 | 4.545565  | -1.673296 | 0.497347  |
| 1 | 3.513574  | -0.484219 | 0.030513  |
| 7 | 0.607389  | -1.735637 | -0.117625 |
| 1 | 1.542170  | -1.876946 | 0.265557  |
| 1 | 0.215675  | -2.654772 | -0.296950 |
| 1 | 0.040907  | -1.315635 | 0.619124  |
| 7 | 1.222334  | 1.666256  | 1.075174  |
| 1 | 1.854188  | 1.308293  | 0.364320  |
| 1 | 1.790517  | 1.993191  | 1.848910  |
| 1 | 0.658463  | 0.886277  | 1.407085  |

-----

Cartesian coordinates of : MP2\_AM8\_17

-----

Atomic number (AN) and Cartesian coordinates

| AN | X         | Y         | Z         |
|----|-----------|-----------|-----------|
| 7  | 4.157011  | -0.173614 | 0.807689  |
| 1  | 5.101061  | -0.185752 | 0.436934  |
| 1  | 4.246636  | -0.098426 | 1.815274  |
| 1  | 3.709522  | 0.684310  | 0.477948  |
| 7  | 0.212033  | 0.267444  | 0.979283  |
| 1  | -0.766569 | 0.237846  | 0.709437  |
| 1  | 0.230926  | 0.182827  | 1.990530  |
| 1  | 0.652127  | -0.568759 | 0.597728  |
| 7  | 1.991216  | -2.157154 | -0.348509 |
| 1  | 2.753217  | -1.600826 | 0.048813  |
| 1  | 2.014299  | -3.064110 | 0.106834  |
| 1  | 2.229556  | -2.321351 | -1.321585 |
| 7  | 2.347215  | 2.159901  | -0.277920 |
| 1  | 1.544901  | 1.674369  | 0.130682  |
| 1  | 2.310271  | 3.131866  | 0.007804  |
| 1  | 2.245507  | 2.142898  | -1.286616 |
| 7  | -3.038163 | 1.519734  | 1.040119  |
| 1  | -3.989778 | 1.871529  | 1.021669  |
| 1  | -2.529002 | 2.112413  | 1.687790  |
| 1  | -2.634044 | 1.675470  | 0.112169  |
| 7  | -1.110528 | -1.536684 | -1.532629 |
| 1  | -0.195355 | -1.786886 | -1.165070 |
| 1  | -1.795852 | -1.741831 | -0.803969 |
| 1  | -1.299023 | -2.158308 | -2.311678 |
| 7  | -1.456758 | 1.585139  | -1.640457 |
| 1  | -0.553489 | 1.988427  | -1.415071 |
| 1  | -1.315208 | 0.577386  | -1.753510 |
| 1  | -1.730301 | 1.959792  | -2.542553 |
| 7  | -3.130144 | -1.663422 | 0.937761  |
| 1  | -3.135276 | -0.655562 | 1.104225  |
| 1  | -2.804042 | -2.112865 | 1.786429  |
| 1  | -4.093254 | -1.953862 | 0.808426  |

-----

Cartesian coordinates of : MP2\_AM8\_18

-----

Atomic number (AN) and Cartesian coordinates

| AN | X         | Y         | Z        |
|----|-----------|-----------|----------|
| 7  | -1.514251 | -2.212048 | 1.396078 |
| 1  | -2.228500 | -2.909797 | 1.211960 |

|   |           |           |           |
|---|-----------|-----------|-----------|
| 1 | -1.237873 | -2.336816 | 2.365092  |
| 1 | -1.976977 | -1.298095 | 1.338076  |
| 7 | 2.428439  | 2.266496  | -0.534298 |
| 1 | 3.238990  | 2.871901  | -0.607884 |
| 1 | 2.769363  | 1.325119  | -0.334255 |
| 1 | 2.006454  | 2.232526  | -1.456833 |
| 7 | 1.110145  | -3.021857 | -0.354489 |
| 1 | 1.303334  | -4.013877 | -0.266732 |
| 1 | 0.844148  | -2.862336 | -1.321023 |
| 1 | 0.283128  | -2.822191 | 0.210767  |
| 7 | 3.300889  | -0.785068 | 0.208267  |
| 1 | 4.192524  | -1.044922 | -0.201181 |
| 1 | 2.671248  | -1.580841 | 0.076390  |
| 1 | 3.457398  | -0.699137 | 1.207501  |
| 7 | -0.135641 | 2.785249  | 1.269441  |
| 1 | -0.514197 | 3.714607  | 1.118791  |
| 1 | 0.760859  | 2.742274  | 0.779412  |
| 1 | 0.062746  | 2.709734  | 2.261734  |
| 7 | -2.724057 | 0.639674  | 0.932553  |
| 1 | -2.003035 | 1.347382  | 1.065520  |
| 1 | -3.561393 | 0.978035  | 1.394447  |
| 1 | -2.923460 | 0.608306  | -0.067794 |
| 7 | -2.591518 | 0.332831  | -2.276116 |
| 1 | -1.607467 | 0.216517  | -2.027794 |
| 1 | -2.888521 | -0.503671 | -2.766059 |
| 1 | -2.658427 | 1.099782  | -2.935865 |
| 7 | 0.045786  | 0.024686  | -0.664465 |
| 1 | -0.398144 | -0.691758 | -0.096537 |
| 1 | -0.069711 | 0.890783  | -0.144261 |
| 1 | 1.038976  | -0.183278 | -0.642280 |

-----

Cartesian coordinates of : MP2\_AM8\_19

-----

Atomic number (AN) and Cartesian coordinates

| AN | X         | Y         | Z         |
|----|-----------|-----------|-----------|
| 7  | -3.447357 | 0.972953  | 0.402825  |
| 1  | -3.417728 | -0.034543 | 0.572306  |
| 1  | -3.656938 | 1.416724  | 1.290986  |
| 1  | -4.247004 | 1.147922  | -0.196796 |
| 7  | -2.904734 | -2.123370 | 0.898232  |
| 1  | -3.012443 | -2.775835 | 0.129535  |
| 1  | -1.920231 | -1.851282 | 0.941765  |
| 1  | -3.128323 | -2.631163 | 1.746933  |
| 7  | -0.869210 | 1.960576  | -1.324980 |
| 1  | -0.504489 | 1.117777  | -1.765972 |
| 1  | -1.711662 | 1.698277  | -0.812044 |
| 1  | -1.156828 | 2.589452  | -2.067292 |
| 7  | 0.709585  | -0.702210 | -2.499931 |
| 1  | 0.213052  | -1.280528 | -3.169992 |
| 1  | 1.353902  | -0.128574 | -3.034622 |
| 1  | 1.275659  | -1.328924 | -1.922369 |
| 7  | 1.448635  | 2.742243  | 0.667872  |
| 1  | 0.696455  | 2.516270  | 0.009172  |
| 1  | 1.012318  | 3.210313  | 1.456041  |
| 1  | 2.029468  | 3.441672  | 0.216113  |
| 7  | 3.107527  | 0.145210  | 1.401709  |
| 1  | 4.021698  | 0.238000  | 0.970111  |
| 1  | 2.585365  | 0.996346  | 1.172236  |
| 1  | 3.267724  | 0.156509  | 2.404047  |
| 7  | -0.228829 | -0.585226 | 0.751450  |
| 1  | 0.676933  | -0.490955 | 1.201575  |
| 1  | -0.744213 | 0.261513  | 0.973547  |
| 1  | -0.035926 | -0.526811 | -0.246049 |
| 7  | 2.143185  | -2.421272 | -0.296890 |
| 1  | 2.850381  | -3.145203 | -0.359917 |
| 1  | 2.501188  | -1.689796 | 0.318407  |
| 1  | 1.340025  | -2.829483 | 0.170269  |

-----



Cartesian coordinates of : MP2\_AM8\_20

-----  
Atomic number (AN) and Cartesian coordinates

| AN | X         | Y         | Z         |
|----|-----------|-----------|-----------|
| 7  | 2.751051  | 1.993306  | 0.639809  |
| 1  | 3.510961  | 2.528635  | 1.045156  |
| 1  | 2.572377  | 1.194761  | 1.251452  |
| 1  | 1.928402  | 2.586664  | 0.666209  |
| 7  | 2.188162  | -0.762732 | 2.149623  |
| 1  | 1.489402  | -0.987901 | 2.850500  |
| 1  | 3.079843  | -1.049086 | 2.541015  |
| 1  | 2.005724  | -1.365065 | 1.341491  |
| 7  | 1.430603  | -2.275568 | -0.497741 |
| 1  | 1.714057  | -1.525492 | -1.126658 |
| 1  | 1.742246  | -3.150712 | -0.904624 |
| 1  | 0.412668  | -2.288798 | -0.487271 |
| 7  | 2.585336  | 0.383071  | -2.036420 |
| 1  | 3.451338  | -0.066529 | -2.314840 |
| 1  | 2.798013  | 0.992958  | -1.243313 |
| 1  | 2.307942  | 0.975298  | -2.812195 |
| 7  | -1.931724 | -2.239722 | -0.397851 |
| 1  | -2.692007 | -1.615736 | -0.112036 |
| 1  | -2.132783 | -2.528668 | -1.350051 |
| 1  | -2.008184 | -3.073284 | 0.176538  |
| 7  | -4.146587 | -0.176767 | 0.499328  |
| 1  | -3.769181 | 0.737102  | 0.236851  |
| 1  | -4.310442 | -0.151848 | 1.500342  |
| 1  | -5.059848 | -0.257248 | 0.064754  |
| 7  | -0.205258 | 0.606696  | -0.041980 |
| 1  | 0.523579  | 0.510633  | -0.744812 |
| 1  | -0.745958 | -0.255283 | -0.092347 |
| 1  | 0.286584  | 0.569820  | 0.845930  |
| 7  | -2.665072 | 2.484032  | -0.326193 |
| 1  | -1.764215 | 2.001336  | -0.264037 |
| 1  | -2.759669 | 2.838768  | -1.271546 |
| 1  | -2.626430 | 3.293468  | 0.283477  |

-----

Cartesian coordinates of : MP2\_AM8\_21

-----  
Atomic number (AN) and Cartesian coordinates

| AN | X         | Y         | Z         |
|----|-----------|-----------|-----------|
| 7  | -0.764991 | -2.877020 | 1.134141  |
| 1  | 0.228697  | -2.710609 | 0.954943  |
| 1  | -0.860729 | -3.094069 | 2.120960  |
| 1  | -1.021459 | -3.721321 | 0.632734  |
| 7  | -0.067112 | 0.200883  | -2.448783 |
| 1  | 0.315035  | -0.445170 | -3.132583 |
| 1  | -0.364486 | 1.020603  | -2.968883 |
| 1  | -0.916550 | -0.235218 | -2.074060 |
| 7  | 2.323920  | -2.291516 | 0.493101  |
| 1  | 2.987965  | -2.461275 | 1.241888  |
| 1  | 2.486311  | -1.335353 | 0.165454  |
| 1  | 2.594976  | -2.907724 | -0.266728 |
| 7  | 2.692761  | 0.643294  | -0.702406 |
| 1  | 2.557560  | 1.502462  | -0.170393 |
| 1  | 1.908630  | 0.580711  | -1.351109 |
| 1  | 3.536594  | 0.767007  | -1.251870 |
| 7  | -2.529682 | -0.988857 | -0.953399 |
| 1  | -2.134178 | -1.597495 | -0.238643 |
| 1  | -2.905831 | -0.167467 | -0.479827 |
| 1  | -3.312847 | -1.481671 | -1.368671 |
| 7  | -0.128856 | 0.382510  | 0.924301  |
| 1  | 0.794365  | 0.250506  | 1.327311  |
| 1  | -0.640746 | -0.465857 | 1.155755  |
| 1  | 0.017336  | 0.326506  | -0.082246 |
| 7  | 1.387686  | 3.162805  | 0.907527  |
| 1  | 1.087137  | 3.890228  | 0.268555  |

|   |           |          |          |
|---|-----------|----------|----------|
| 1 | 1.605099  | 3.614069 | 1.788951 |
| 1 | 0.596520  | 2.542891 | 1.066436 |
| 7 | -2.937688 | 1.766732 | 0.659468 |
| 1 | -1.978225 | 1.567319 | 0.941234 |
| 1 | -2.933144 | 2.628298 | 0.125260 |
| 1 | -3.480296 | 1.940817 | 1.497884 |

-----

Cartesian coordinates of : MP2\_AM8\_22

-----

Atomic number (AN) and Cartesian coordinates

| AN | X         | Y         | Z         |
|----|-----------|-----------|-----------|
| 7  | 5.190212  | -0.472086 | 0.442827  |
| 1  | 5.716351  | -1.241855 | 0.045656  |
| 1  | 5.761425  | 0.359780  | 0.349081  |
| 1  | 5.087163  | -0.658106 | 1.433708  |
| 7  | -0.203249 | 0.028888  | 1.757416  |
| 1  | 0.531491  | -0.362406 | 1.167945  |
| 1  | -1.070784 | -0.438695 | 1.508938  |
| 1  | 0.003375  | -0.223933 | 2.717944  |
| 7  | -0.704037 | -2.250324 | -1.011013 |
| 1  | 0.211955  | -2.228949 | -0.573347 |
| 1  | -0.693807 | -3.004065 | -1.689824 |
| 1  | -0.796543 | -1.367637 | -1.519990 |
| 7  | 2.057535  | -0.325537 | -0.492038 |
| 1  | 3.056094  | -0.322323 | -0.290878 |
| 1  | 1.939584  | -0.716462 | -1.420784 |
| 1  | 1.744929  | 0.642333  | -0.543880 |
| 7  | -1.055497 | 0.680111  | -2.109636 |
| 1  | -0.213860 | 1.217385  | -1.922240 |
| 1  | -1.750009 | 1.005049  | -1.434874 |
| 1  | -1.378544 | 0.947132  | -3.033716 |
| 7  | -2.902658 | 1.476539  | 0.389206  |
| 1  | -3.797373 | 1.950498  | 0.452124  |
| 1  | -3.047438 | 0.504149  | 0.662081  |
| 1  | -2.299771 | 1.882255  | 1.097259  |
| 7  | 0.563546  | 2.561416  | 0.050118  |
| 1  | -0.228147 | 3.083319  | -0.309864 |
| 1  | 1.172922  | 3.227724  | 0.512055  |
| 1  | 0.209883  | 1.914394  | 0.756835  |
| 7  | -3.063393 | -1.697034 | 0.911945  |
| 1  | -3.950981 | -1.859020 | 0.447101  |
| 1  | -3.059810 | -2.293409 | 1.733000  |
| 1  | -2.325311 | -2.030976 | 0.283894  |

-----

Cartesian coordinates of : MP2\_AM8\_23

-----

Atomic number (AN) and Cartesian coordinates

| AN | X         | Y         | Z         |
|----|-----------|-----------|-----------|
| 7  | 0.602745  | -2.136085 | -1.714523 |
| 1  | 1.122646  | -1.659914 | -2.443909 |
| 1  | -0.093079 | -1.477836 | -1.355866 |
| 1  | 0.106348  | -2.900366 | -2.160326 |
| 7  | -1.237996 | -0.325132 | 0.056485  |
| 1  | -2.251591 | -0.378584 | 0.145015  |
| 1  | -0.967843 | 0.625856  | 0.294923  |
| 1  | -0.831920 | -0.923448 | 0.772201  |
| 7  | 0.957331  | -2.439441 | 1.470813  |
| 1  | 1.003898  | -2.490083 | 0.452859  |
| 1  | 1.902718  | -2.280109 | 1.803460  |
| 1  | 0.680105  | -3.354983 | 1.808643  |
| 7  | 2.778069  | 0.088108  | -0.608698 |
| 1  | 3.785071  | 0.188198  | -0.678003 |
| 1  | 2.504037  | 0.354822  | 0.339154  |
| 1  | 2.565565  | -0.898877 | -0.715850 |
| 7  | 0.436760  | 1.630386  | -2.088162 |
| 1  | -0.285202 | 0.917134  | -2.096017 |

|   |           |           |           |
|---|-----------|-----------|-----------|
| 1 | 0.592728  | 1.925687  | -3.045361 |
| 1 | 1.291276  | 1.183748  | -1.748972 |
| 7 | 1.398098  | 0.742069  | 2.160501  |
| 1 | 0.718212  | 1.420025  | 1.818298  |
| 1 | 0.931347  | -0.155970 | 2.251731  |
| 1 | 1.680410  | 1.035039  | 3.089369  |
| 7 | -0.274106 | 3.001910  | 0.588882  |
| 1 | -0.034775 | 2.749663  | -0.374091 |
| 1 | -1.189504 | 3.439111  | 0.573067  |
| 1 | 0.381421  | 3.717362  | 0.885940  |
| 7 | -4.511918 | -0.492240 | 0.137894  |
| 1 | -4.886052 | -1.207720 | 0.750547  |
| 1 | -4.831990 | -0.702174 | -0.800494 |
| 1 | -4.936695 | 0.386400  | 0.411332  |

-----

Cartesian coordinates of : MP2\_AM8\_24

-----

Atomic number (AN) and Cartesian coordinates

| AN | X         | Y         | Z         |
|----|-----------|-----------|-----------|
| 7  | 0.314407  | -0.614481 | 1.976373  |
| 1  | -0.443170 | -0.572633 | 1.289324  |
| 1  | 0.848887  | -1.448238 | 1.752318  |
| 1  | -0.106947 | -0.771515 | 2.886165  |
| 7  | 0.939140  | -2.646584 | -0.580338 |
| 1  | 1.146630  | -3.464519 | -1.143287 |
| 1  | 0.848083  | -1.845017 | -1.208139 |
| 1  | 0.030503  | -2.800151 | -0.156444 |
| 7  | -1.795729 | -0.373704 | -0.379226 |
| 1  | -2.806560 | -0.376042 | -0.254930 |
| 1  | -1.513877 | 0.568710  | -0.643897 |
| 1  | -1.591046 | -0.959221 | -1.182240 |
| 7  | -0.647739 | 2.668397  | -0.792406 |
| 1  | -0.421274 | 3.343505  | -1.515308 |
| 1  | -1.451752 | 3.039181  | -0.296516 |
| 1  | 0.136407  | 2.642992  | -0.133687 |
| 7  | 1.209793  | 0.133633  | -1.984482 |
| 1  | 1.467633  | 0.400779  | -2.928469 |
| 1  | 2.050020  | 0.173674  | -1.410721 |
| 1  | 0.569350  | 0.844211  | -1.638819 |
| 7  | 3.411685  | -0.745124 | 0.253716  |
| 1  | 3.388536  | -0.458156 | 1.226245  |
| 1  | 2.713108  | -1.480003 | 0.143442  |
| 1  | 4.321774  | -1.161862 | 0.089235  |
| 7  | 1.713908  | 2.091339  | 1.126492  |
| 1  | 2.547606  | 1.808231  | 0.621425  |
| 1  | 1.315474  | 1.240178  | 1.530114  |
| 1  | 2.014948  | 2.688041  | 1.889473  |
| 7  | -5.004892 | -0.490790 | 0.332430  |
| 1  | -5.572621 | 0.322129  | 0.122910  |
| 1  | -4.987920 | -0.595820 | 1.340252  |
| 1  | -5.487803 | -1.297267 | -0.046367 |

-----

Cartesian coordinates of : MP2\_AM8\_25

-----

Atomic number (AN) and Cartesian coordinates

| AN | X         | Y         | Z         |
|----|-----------|-----------|-----------|
| 7  | 0.886593  | -0.632459 | -1.958389 |
| 1  | 0.938049  | -1.129714 | -2.840994 |
| 1  | -0.092402 | -0.568169 | -1.690451 |
| 1  | 1.322311  | -1.216741 | -1.247620 |
| 7  | -1.333418 | -2.865053 | -0.186588 |
| 1  | -1.518484 | -1.865728 | -0.280486 |
| 1  | -2.124974 | -3.286662 | 0.286129  |
| 1  | -1.295569 | -3.265915 | -1.116866 |
| 7  | -1.518304 | 0.299872  | 0.065890  |
| 1  | -1.021857 | 1.114411  | -0.292585 |

|   |           |           |           |
|---|-----------|-----------|-----------|
| 1 | -1.128949 | 0.139566  | 0.990910  |
| 1 | -2.495984 | 0.561448  | 0.184892  |
| 7 | 1.143359  | 1.211969  | 2.007505  |
| 1 | 1.367254  | 1.602894  | 2.916366  |
| 1 | 0.524259  | 1.867736  | 1.541834  |
| 1 | 2.001263  | 1.186802  | 1.456604  |
| 7 | 1.466487  | -1.874006 | 1.017814  |
| 1 | 1.174577  | -1.045406 | 1.535405  |
| 1 | 1.957915  | -2.478180 | 1.668762  |
| 1 | 0.620553  | -2.370920 | 0.736724  |
| 7 | 3.469993  | 0.420054  | -0.039166 |
| 1 | 3.319038  | 0.600296  | -1.025974 |
| 1 | 3.020610  | -0.472924 | 0.160563  |
| 1 | 4.468676  | 0.306307  | 0.096303  |
| 7 | -4.709338 | 1.000526  | 0.246759  |
| 1 | -5.101245 | 1.216594  | 1.156166  |
| 1 | -5.226826 | 0.211642  | -0.123462 |
| 1 | -4.898652 | 1.793164  | -0.355928 |
| 7 | 0.747679  | 2.408695  | -1.113779 |
| 1 | 0.556176  | 3.064088  | -1.863882 |
| 1 | 0.982717  | 1.509633  | -1.535652 |
| 1 | 1.580188  | 2.738590  | -0.637086 |

-----

Cartesian coordinates of : MP2\_AM8\_26

-----

Atomic number (AN) and Cartesian coordinates

| AN | X         | Y         | Z         |
|----|-----------|-----------|-----------|
| 7  | 1.195113  | -0.247892 | -1.927661 |
| 1  | 2.087758  | -0.181240 | -1.443226 |
| 1  | 1.389411  | -0.524208 | -2.884451 |
| 1  | 0.682189  | -1.015909 | -1.500052 |
| 7  | -0.687609 | -2.734321 | -0.578813 |
| 1  | -1.264621 | -1.889665 | -0.495295 |
| 1  | -0.910760 | -3.330261 | 0.211993  |
| 1  | -0.990861 | -3.234322 | -1.408235 |
| 7  | -1.918245 | 0.060735  | -0.342725 |
| 1  | -1.549926 | 0.538955  | -1.157942 |
| 1  | -1.345455 | 0.339405  | 0.454978  |
| 1  | -2.868000 | 0.392345  | -0.189778 |
| 7  | 0.253509  | 0.668483  | 1.954067  |
| 1  | 0.819264  | 1.421665  | 1.575705  |
| 1  | 0.794176  | -0.193294 | 1.863908  |
| 1  | 0.129820  | 0.852561  | 2.943799  |
| 7  | 1.942339  | -1.886580 | 1.104652  |
| 1  | 2.406629  | -2.671917 | 1.547146  |
| 1  | 2.642569  | -1.374535 | 0.576055  |
| 1  | 1.263492  | -2.262059 | 0.444171  |
| 7  | -5.085249 | 0.651041  | 0.268338  |
| 1  | -5.209461 | 0.847817  | 1.254571  |
| 1  | -5.392021 | -0.301026 | 0.106431  |
| 1  | -5.711951 | 1.262658  | -0.241468 |
| 7  | 3.489260  | 0.873532  | 0.154252  |
| 1  | 3.610087  | 0.726154  | 1.151008  |
| 1  | 2.754040  | 1.572530  | 0.043442  |
| 1  | 4.352465  | 1.284215  | -0.185789 |
| 7  | 0.882332  | 2.592570  | -0.635332 |
| 1  | -0.004692 | 2.771293  | -0.176443 |
| 1  | 0.765183  | 1.753154  | -1.206193 |
| 1  | 1.050508  | 3.372699  | -1.261779 |

-----

Cartesian coordinates of : MP2\_AM8\_27

-----

Atomic number (AN) and Cartesian coordinates

| AN | X        | Y        | Z         |
|----|----------|----------|-----------|
| 7  | 0.429512 | 2.449821 | -0.934339 |
| 1  | 1.152599 | 3.154515 | -1.030763 |

|   |           |           |           |
|---|-----------|-----------|-----------|
| 1 | -0.457929 | 2.940632  | -0.955633 |
| 1 | 0.519316  | 2.039119  | -0.006098 |
| 7 | -0.462426 | -2.654292 | 0.099677  |
| 1 | -0.447917 | -3.587742 | -0.298203 |
| 1 | 0.501402  | -2.412364 | 0.336106  |
| 1 | -0.971190 | -2.722579 | 0.975300  |
| 7 | 0.980057  | -0.520770 | -2.121580 |
| 1 | 0.226207  | -1.102617 | -1.767651 |
| 1 | 0.968692  | -0.585252 | -3.133456 |
| 1 | 0.766719  | 0.445481  | -1.874731 |
| 7 | 2.584552  | -1.698655 | 0.313633  |
| 1 | 3.177031  | -0.976443 | 0.720200  |
| 1 | 2.357056  | -1.374995 | -0.628379 |
| 1 | 3.155572  | -2.533107 | 0.225769  |
| 7 | -2.037956 | 0.165291  | -0.194335 |
| 1 | -3.051869 | 0.176142  | -0.101628 |
| 1 | -1.737217 | -0.796310 | -0.340190 |
| 1 | -1.803090 | 0.678188  | -1.037600 |
| 7 | 0.488056  | 0.538349  | 1.646638  |
| 1 | -0.444472 | 0.448682  | 1.236581  |
| 1 | 0.373962  | 0.642569  | 2.649717  |
| 1 | 0.973165  | -0.342203 | 1.486697  |
| 7 | -5.254270 | 0.375107  | 0.387121  |
| 1 | -5.257164 | 0.909700  | 1.248113  |
| 1 | -5.828020 | 0.876694  | -0.280983 |
| 1 | -5.719786 | -0.504859 | 0.577099  |
| 7 | 3.487399  | 1.307255  | 0.786615  |
| 1 | 2.506603  | 1.355064  | 1.054098  |
| 1 | 3.987510  | 2.044034  | 1.269721  |
| 1 | 3.548359  | 1.492913  | -0.208091 |

-----

Cartesian coordinates of : MP2\_AM8\_28

-----

Atomic number (AN) and Cartesian coordinates

| AN | X         | Y         | Z         |
|----|-----------|-----------|-----------|
| 7  | -0.122781 | -2.182563 | -0.574900 |
| 1  | 0.278034  | -3.110067 | -0.653861 |
| 1  | -0.620848 | -2.127853 | 0.309610  |
| 1  | 0.643011  | -1.512224 | -0.549960 |
| 7  | 1.634314  | 0.495121  | -0.896689 |
| 1  | 2.431085  | 1.104849  | -0.709579 |
| 1  | 0.820859  | 0.900017  | -0.432384 |
| 1  | 1.457208  | 0.536189  | -1.895417 |
| 7  | 4.446891  | 1.700939  | 0.096868  |
| 1  | 4.513329  | 0.736278  | 0.420027  |
| 1  | 4.539234  | 2.307973  | 0.903325  |
| 1  | 5.244006  | 1.885134  | -0.501568 |
| 7  | -2.129187 | -0.103967 | -1.735574 |
| 1  | -1.538237 | 0.677387  | -1.463519 |
| 1  | -2.347253 | 0.006000  | -2.720657 |
| 1  | -1.540957 | -0.935015 | -1.642923 |
| 7  | -3.988988 | 1.606833  | 0.218401  |
| 1  | -4.222882 | 2.488530  | -0.224439 |
| 1  | -4.850971 | 1.236707  | 0.602895  |
| 1  | -3.669924 | 0.966588  | -0.507490 |
| 7  | 3.769288  | -1.344666 | 0.621871  |
| 1  | 3.439199  | -1.753619 | 1.488707  |
| 1  | 2.957580  | -0.994812 | 0.113625  |
| 1  | 4.176973  | -2.097027 | 0.078347  |
| 7  | -2.678844 | -1.441825 | 1.252106  |
| 1  | -3.164700 | -2.326344 | 1.353031  |
| 1  | -3.129629 | -0.779286 | 1.873664  |
| 1  | -2.828524 | -1.112180 | 0.301368  |
| 7  | -0.857029 | 1.283898  | 0.996809  |
| 1  | -0.404685 | 1.889496  | 1.674027  |
| 1  | -1.833931 | 1.570620  | 0.942267  |
| 1  | -0.863624 | 0.346267  | 1.388663  |

-----

Cartesian coordinates of : MP2\_AM8\_29

-----  
Atomic number (AN) and Cartesian coordinates

| AN | X         | Y         | Z         |
|----|-----------|-----------|-----------|
| 7  | 5.025031  | 0.566249  | 0.268202  |
| 1  | 4.907579  | 0.989971  | 1.181100  |
| 1  | 5.466749  | -0.335440 | 0.404229  |
| 1  | 5.673297  | 1.143244  | -0.254672 |
| 7  | -0.505394 | 1.485113  | 1.585317  |
| 1  | -0.324960 | 2.153377  | 2.327765  |
| 1  | -0.931498 | 0.661859  | 2.009490  |
| 1  | 0.399315  | 1.164980  | 1.227899  |
| 7  | -1.688726 | -0.882999 | -1.591483 |
| 1  | -2.443988 | -0.375339 | -1.126820 |
| 1  | -1.029269 | -0.159340 | -1.874199 |
| 1  | -2.078784 | -1.280012 | -2.440835 |
| 7  | -0.464364 | 2.095901  | -1.600523 |
| 1  | 0.217693  | 2.829378  | -1.761553 |
| 1  | -1.329247 | 2.397510  | -2.036287 |
| 1  | -0.625158 | 2.048512  | -0.594530 |
| 7  | -1.442508 | -1.533606 | 1.711565  |
| 1  | -1.653015 | -1.491957 | 0.717358  |
| 1  | -0.476242 | -1.836532 | 1.781428  |
| 1  | -2.017364 | -2.260683 | 2.122738  |
| 7  | 0.649501  | -2.856901 | -0.599822 |
| 1  | 1.184947  | -3.149413 | -1.409926 |
| 1  | 0.310981  | -3.701074 | -0.151549 |
| 1  | -0.164953 | -2.339374 | -0.932883 |
| 7  | 1.786515  | 0.170490  | -0.080867 |
| 1  | 1.597104  | -0.829806 | -0.063165 |
| 1  | 2.793517  | 0.293192  | -0.159882 |
| 1  | 1.357911  | 0.531860  | -0.928029 |
| 7  | -3.419778 | 0.961920  | 0.317999  |
| 1  | -2.546954 | 1.361213  | 0.661212  |
| 1  | -4.065850 | 1.724508  | 0.146316  |
| 1  | -3.803753 | 0.416200  | 1.082075  |

-----  
Cartesian coordinates of : MP2\_AM8\_30

-----  
Atomic number (AN) and Cartesian coordinates

| AN | X         | Y         | Z         |
|----|-----------|-----------|-----------|
| 7  | -2.643923 | 2.283241  | -0.839820 |
| 1  | -3.336199 | 3.001133  | -1.024970 |
| 1  | -2.262707 | 2.014166  | -1.740403 |
| 1  | -1.886215 | 2.722886  | -0.311229 |
| 7  | 3.484119  | 0.255048  | 0.839767  |
| 1  | 3.259217  | -0.591637 | 0.311220  |
| 1  | 3.024339  | 0.175773  | 1.740376  |
| 1  | 4.481268  | 0.236974  | 1.024872  |
| 7  | 2.643920  | -2.283237 | -0.839820 |
| 1  | 2.262701  | -2.014161 | -1.740402 |
| 1  | 1.886213  | -2.722885 | -0.311229 |
| 1  | 3.336196  | -3.001128 | -1.024974 |
| 7  | 0.255029  | -3.483906 | 0.839895  |
| 1  | 0.236947  | -4.481031 | 1.025125  |
| 1  | -0.591643 | -3.259066 | 0.311300  |
| 1  | 0.175736  | -3.024011 | 1.740443  |
| 7  | 2.283218  | 2.643893  | -0.839844 |
| 1  | 3.001056  | 3.336216  | -1.025028 |
| 1  | 2.014110  | 2.262676  | -1.740418 |
| 1  | 2.722942  | 1.886203  | -0.311293 |
| 7  | -0.255030 | 3.483903  | 0.839896  |
| 1  | -0.175737 | 3.024008  | 1.740444  |
| 1  | -0.236947 | 4.481028  | 1.025127  |
| 1  | 0.591642  | 3.259063  | 0.311301  |
| 7  | -2.283220 | -2.643896 | -0.839843 |
| 1  | -3.001060 | -3.336217 | -1.025023 |

|   |           |           |           |
|---|-----------|-----------|-----------|
| 1 | -2.014114 | -2.262681 | -1.740419 |
| 1 | -2.722941 | -1.886203 | -0.311293 |
| 7 | -3.484113 | -0.255047 | 0.839769  |
| 1 | -3.024328 | -0.175770 | 1.740375  |
| 1 | -4.481261 | -0.236974 | 1.024878  |
| 1 | -3.259215 | 0.591639  | 0.311220  |

-----

Cartesian coordinates of : MP2\_AM8\_31

-----

Atomic number (AN) and Cartesian coordinates

| AN | X         | Y         | Z         |
|----|-----------|-----------|-----------|
| 7  | 0.520834  | -1.818968 | 0.052230  |
| 1  | 0.840978  | -2.697225 | -0.340822 |
| 1  | 0.607277  | -1.900932 | 1.059430  |
| 1  | 1.169806  | -1.092565 | -0.250344 |
| 7  | 2.329143  | 0.696150  | -0.851297 |
| 1  | 3.092475  | 1.154731  | -0.352641 |
| 1  | 1.458373  | 1.154210  | -0.573792 |
| 1  | 2.460043  | 0.904856  | -1.836468 |
| 7  | 5.027200  | 1.339706  | 0.813707  |
| 1  | 5.096081  | 0.327538  | 0.715636  |
| 1  | 4.994462  | 1.556435  | 1.803304  |
| 1  | 5.881238  | 1.748195  | 0.451672  |
| 7  | -2.329070 | -0.696197 | -0.851458 |
| 1  | -2.459886 | -0.904959 | -1.836629 |
| 1  | -3.092444 | -1.154751 | -0.352841 |
| 1  | -1.458324 | -1.154241 | -0.573853 |
| 7  | -4.388737 | 1.645244  | -0.023517 |
| 1  | -4.048551 | 2.391309  | 0.572285  |
| 1  | -4.842743 | 2.084599  | -0.816366 |
| 1  | -3.580116 | 1.130093  | -0.368702 |
| 7  | 4.388738  | -1.645246 | -0.023050 |
| 1  | 4.048502  | -2.391277 | 0.572766  |
| 1  | 3.580147  | -1.130114 | -0.368332 |
| 1  | 4.842812  | -2.084645 | -0.815835 |
| 7  | -5.027269 | -1.339661 | 0.813352  |
| 1  | -5.881276 | -1.748171 | 0.451268  |
| 1  | -4.994615 | -1.556334 | 1.802964  |
| 1  | -5.096142 | -0.327498 | 0.715219  |
| 7  | -0.520839 | 1.818971  | 0.052084  |
| 1  | -0.840949 | 2.697206  | -0.341043 |
| 1  | -1.169785 | 1.092551  | -0.250506 |
| 1  | -0.607368 | 1.900991  | 1.059272  |

-----

Cartesian coordinates of : MP2\_AM8\_32

-----

Atomic number (AN) and Cartesian coordinates

| AN | X         | Y         | Z         |
|----|-----------|-----------|-----------|
| 7  | -0.361848 | 2.436614  | 0.462954  |
| 1  | -0.190069 | 2.587903  | 1.450971  |
| 1  | -0.348241 | 1.431022  | 0.293345  |
| 1  | -1.306676 | 2.754128  | 0.274907  |
| 7  | -0.204556 | -0.705537 | -0.113927 |
| 1  | -0.145435 | -1.274251 | -0.952460 |
| 1  | -0.840077 | -1.184452 | 0.517043  |
| 1  | 0.727849  | -0.690575 | 0.311271  |
| 7  | 2.670252  | -0.167770 | 0.971044  |
| 1  | 2.788903  | 0.708891  | 0.461895  |
| 1  | 2.853699  | 0.028576  | 1.949216  |
| 1  | 3.396231  | -0.810561 | 0.659793  |
| 7  | 2.525943  | 2.548484  | -0.772957 |
| 1  | 3.027057  | 3.421029  | -0.647351 |
| 1  | 1.555680  | 2.706277  | -0.496683 |
| 1  | 2.529583  | 2.352456  | -1.767908 |
| 7  | 4.805817  | -2.357533 | -0.226488 |
| 1  | 4.260655  | -2.823991 | -0.942126 |

|   |           |           |           |
|---|-----------|-----------|-----------|
| 1 | 5.611989  | -1.944704 | -0.681053 |
| 1 | 5.150218  | -3.073442 | 0.402673  |
| 7 | -3.602706 | -2.285612 | -0.646573 |
| 1 | -3.411339 | -1.819890 | 0.240076  |
| 1 | -2.965117 | -3.069183 | -0.731456 |
| 1 | -4.537287 | -2.675016 | -0.593551 |
| 7 | -2.850041 | 0.771473  | -1.332875 |
| 1 | -3.027592 | 1.370786  | -2.130802 |
| 1 | -3.256478 | -0.142403 | -1.523673 |
| 1 | -1.846647 | 0.623900  | -1.266467 |
| 7 | -3.084427 | -0.124677 | 1.650920  |
| 1 | -3.128335 | 0.467294  | 0.820464  |
| 1 | -3.905268 | 0.068997  | 2.214844  |
| 1 | -2.282353 | 0.179117  | 2.192350  |

-----

Cartesian coordinates of : MP2\_AM8\_33

-----

Atomic number (AN) and Cartesian coordinates

| AN | X         | Y         | Z         |
|----|-----------|-----------|-----------|
| 7  | -1.251205 | -2.317274 | -0.926336 |
| 1  | -1.867049 | -3.109348 | -1.074759 |
| 1  | -1.048476 | -1.932578 | -1.842669 |
| 1  | -1.780082 | -1.608264 | -0.408359 |
| 7  | 1.251018  | 2.317036  | 0.926500  |
| 1  | 1.779976  | 1.608098  | 0.408507  |
| 1  | 1.048115  | 1.932201  | 1.842736  |
| 1  | 1.866846  | 3.109078  | 1.075158  |
| 7  | 2.675858  | 0.054783  | -0.686258 |
| 1  | 2.363438  | -0.000829 | -1.649586 |
| 1  | 2.331134  | -0.781515 | -0.212407 |
| 1  | 3.692391  | 0.006446  | -0.698589 |
| 7  | 1.331498  | -2.406171 | 0.872703  |
| 1  | 1.735402  | -3.334460 | 0.932859  |
| 1  | 0.488614  | -2.474830 | 0.297350  |
| 1  | 1.034611  | -2.158409 | 1.810250  |
| 7  | -1.331417 | 2.405954  | -0.872908 |
| 1  | -1.735232 | 3.334268  | -0.933284 |
| 1  | -1.034416 | 2.158002  | -1.810368 |
| 1  | -0.488609 | 2.474642  | -0.297446 |
| 7  | -2.675822 | -0.054809 | 0.686318  |
| 1  | -2.363363 | 0.000876  | 1.649629  |
| 1  | -3.692353 | -0.006442 | 0.698683  |
| 1  | -2.331099 | 0.781441  | 0.212384  |
| 7  | -5.906271 | -0.021010 | 0.127532  |
| 1  | -5.745289 | -0.168225 | -0.862048 |
| 1  | -6.424148 | 0.844169  | 0.226622  |
| 1  | -6.505130 | -0.770704 | 0.452917  |
| 7  | 5.906330  | 0.021465  | -0.127546 |
| 1  | 5.745414  | 0.169361  | 0.861943  |
| 1  | 6.505130  | 0.770962  | -0.453495 |
| 1  | 6.424245  | -0.843757 | -0.226070 |

-----

Cartesian coordinates of ammonia nanomer: (NH3)9

Cartesian coordinates of : MP2\_AM9\_1

-----

Atomic number (AN) and Cartesian coordinates

| AN | X         | Y         | Z         |
|----|-----------|-----------|-----------|
| 7  | 3.344079  | -0.370997 | -0.073309 |
| 1  | 3.608641  | -1.289949 | 0.265858  |
| 1  | 4.205601  | 0.152843  | -0.187342 |
| 1  | 2.804078  | 0.081804  | 0.664425  |
| 7  | -1.665552 | 0.371678  | -1.952271 |
| 1  | -2.180308 | 0.448031  | -2.824079 |



|   |           |           |           |
|---|-----------|-----------|-----------|
| 1 | -2.051602 | -0.427141 | -1.449178 |
| 1 | -1.882732 | 1.206272  | -1.404525 |
| 7 | 0.819667  | -1.729458 | -1.601745 |
| 1 | 0.179638  | -0.995416 | -1.904975 |
| 1 | 1.015884  | -2.310979 | -2.410423 |
| 1 | 1.695815  | -1.275890 | -1.345841 |
| 7 | -2.120112 | -2.430731 | -0.387225 |
| 1 | -2.124701 | -2.608573 | 0.611295  |
| 1 | -1.147985 | -2.486692 | -0.683928 |
| 1 | -2.627017 | -3.190599 | -0.828346 |
| 7 | 1.226140  | 1.853384  | -1.424657 |
| 1 | 1.447484  | 2.550941  | -2.127647 |
| 1 | 0.384941  | 1.368049  | -1.735987 |
| 1 | 1.979033  | 1.170398  | -1.433519 |
| 7 | 1.270593  | 1.311522  | 1.705338  |
| 1 | 1.255340  | 1.764708  | 0.790860  |
| 1 | 1.620832  | 1.987724  | 2.376470  |
| 1 | 0.297304  | 1.132048  | 1.945597  |
| 7 | -1.860324 | 0.135932  | 1.973362  |
| 1 | -1.211402 | -0.653159 | 1.984673  |
| 1 | -2.374956 | 0.119397  | 2.848253  |
| 1 | -2.528828 | -0.061389 | 1.234359  |
| 7 | 0.550574  | -1.879799 | 1.667552  |
| 1 | 1.115142  | -1.060889 | 1.878852  |
| 1 | 0.927708  | -2.664768 | 2.187127  |
| 1 | 0.670326  | -2.072268 | 0.674441  |
| 7 | -1.650044 | 2.780968  | 0.065460  |
| 1 | -1.663792 | 2.165396  | 0.875906  |
| 1 | -2.139097 | 3.634720  | 0.308913  |
| 1 | -0.680497 | 3.017891  | -0.118783 |

-----

Cartesian coordinates of : MP2\_AM9\_2

-----

Atomic number (AN) and Cartesian coordinates

| AN | X         | Y         | Z         |
|----|-----------|-----------|-----------|
| 7  | -3.182819 | 1.071798  | 0.624113  |
| 1  | -2.609276 | 0.566713  | 1.299111  |
| 1  | -2.781121 | 1.999472  | 0.539896  |
| 1  | -4.111082 | 1.181922  | 1.017749  |
| 7  | 0.512526  | -3.014076 | -0.549059 |
| 1  | 0.458954  | -3.450762 | 0.365529  |
| 1  | 0.596616  | -3.767664 | -1.223616 |
| 1  | -0.384632 | -2.553795 | -0.712784 |
| 7  | -1.189618 | -1.005545 | 1.978208  |
| 1  | -1.572790 | -1.552213 | 2.742493  |
| 1  | -0.170013 | -1.062859 | 2.038868  |
| 1  | -1.459490 | -1.457354 | 1.108282  |
| 7  | 1.936312  | -1.039831 | 1.650378  |
| 1  | 2.296689  | -0.122794 | 1.396422  |
| 1  | 1.904659  | -1.591977 | 0.797186  |
| 1  | 2.618388  | -1.468504 | 2.267029  |
| 7  | -2.032883 | -1.230428 | -1.300936 |
| 1  | -2.560377 | -0.524182 | -0.784795 |
| 1  | -1.436388 | -0.704594 | -1.934428 |
| 1  | -2.701151 | -1.736533 | -1.874062 |
| 7  | 0.029901  | 2.010542  | 1.214094  |
| 1  | 1.036147  | 1.878522  | 1.127855  |
| 1  | -0.111807 | 2.756411  | 1.887846  |
| 1  | -0.342510 | 1.161157  | 1.633198  |
| 7  | 1.671716  | -0.221159 | -1.902294 |
| 1  | 2.022907  | -0.412715 | -2.834568 |
| 1  | 0.812638  | 0.319351  | -2.003651 |
| 1  | 1.427798  | -1.117208 | -1.485404 |
| 7  | -0.809284 | 1.812553  | -1.829171 |
| 1  | -0.587455 | 1.984535  | -0.845073 |
| 1  | -1.820283 | 1.756239  | -1.897188 |
| 1  | -0.527041 | 2.633547  | -2.354922 |
| 7  | 3.086397  | 1.641306  | 0.147113  |
| 1  | 3.020849  | 2.608397  | -0.153294 |

```

1      2.750163      1.053121      -0.621840
1      4.073872      1.447659      0.277036
-----

```

Cartesian coordinates of : MP2\_AM9\_3

-----  
Atomic number (AN) and Cartesian coordinates

| AN | X         | Y         | Z         |
|----|-----------|-----------|-----------|
| 7  | 3.235725  | -1.082445 | -0.529204 |
| 1  | 4.007069  | -1.411081 | 0.044084  |
| 1  | 3.515719  | -1.250564 | -1.490875 |
| 1  | 2.444355  | -1.706609 | -0.338545 |
| 7  | -2.872856 | 1.621336  | -0.917445 |
| 1  | -2.078162 | 1.112721  | -1.312478 |
| 1  | -3.135732 | 2.350716  | -1.571590 |
| 1  | -3.654519 | 0.976694  | -0.867098 |
| 7  | -0.181151 | 0.140477  | -1.414158 |
| 1  | -0.220101 | -0.296329 | -0.497567 |
| 1  | 0.585208  | 0.809588  | -1.371202 |
| 1  | 0.109283  | -0.596742 | -2.048882 |
| 7  | 2.491139  | 2.015074  | -0.823638 |
| 1  | 3.002561  | 2.398347  | -1.611985 |
| 1  | 2.819054  | 1.057206  | -0.681798 |
| 1  | 2.775276  | 2.548844  | -0.008353 |
| 7  | 1.014589  | 0.155034  | 1.938972  |
| 1  | 1.774125  | -0.014374 | 1.284873  |
| 1  | 1.424420  | 0.195004  | 2.866872  |
| 1  | 0.635732  | 1.081852  | 1.728978  |
| 7  | 0.791347  | -2.781368 | 0.417049  |
| 1  | 0.596115  | -2.165640 | 1.202976  |
| 1  | 0.960529  | -3.708405 | 0.793687  |
| 1  | -0.070583 | -2.836212 | -0.127895 |
| 7  | -2.086795 | -2.413323 | -0.942326 |
| 1  | -2.226410 | -1.860448 | -1.781138 |
| 1  | -2.269324 | -1.803612 | -0.141968 |
| 1  | -2.790107 | -3.144000 | -0.948262 |
| 7  | -0.320847 | 2.743530  | 0.764825  |
| 1  | -0.365328 | 3.696248  | 1.110325  |
| 1  | -1.237440 | 2.519728  | 0.380987  |
| 1  | 0.343503  | 2.728885  | -0.005168 |
| 7  | -2.158951 | -0.426198 | 1.513030  |
| 1  | -1.188872 | -0.361797 | 1.818641  |
| 1  | -2.719939 | -0.625560 | 2.334751  |
| 1  | -2.421830 | 0.500724  | 1.188891  |

-----  
Cartesian coordinates of : MP2\_AM9\_4

-----  
Atomic number (AN) and Cartesian coordinates

| AN | X         | Y         | Z         |
|----|-----------|-----------|-----------|
| 7  | 2.791507  | 1.941545  | -0.531260 |
| 1  | 1.783657  | 2.090063  | -0.581636 |
| 1  | 3.226576  | 2.849261  | -0.403182 |
| 1  | 3.083504  | 1.602994  | -1.442242 |
| 7  | 0.252210  | -0.328617 | -1.923571 |
| 1  | 0.120677  | 0.548145  | -1.421279 |
| 1  | 0.154595  | -0.119758 | -2.912287 |
| 1  | 1.219655  | -0.618657 | -1.775818 |
| 7  | -0.308910 | 2.268839  | 0.157250  |
| 1  | 0.039048  | 1.797595  | 0.990673  |
| 1  | -1.295121 | 2.025882  | 0.056449  |
| 1  | -0.280751 | 3.266501  | 0.344967  |
| 7  | -3.361937 | 1.420023  | -0.474176 |
| 1  | -3.302122 | 0.463300  | -0.834457 |
| 1  | -3.396610 | 2.044805  | -1.273280 |
| 1  | -4.254773 | 1.514307  | -0.001001 |
| 7  | 3.085394  | -1.293013 | -0.780570 |
| 1  | 3.407055  | -0.432119 | -0.349044 |

|   |           |           |           |
|---|-----------|-----------|-----------|
| 1 | 2.547790  | -1.801480 | -0.083076 |
| 1 | 3.900938  | -1.848072 | -1.013960 |
| 7 | 1.472119  | 0.321615  | 2.035134  |
| 1 | 1.383957  | -0.645891 | 1.727208  |
| 1 | 2.110581  | 0.780384  | 1.387423  |
| 1 | 1.925225  | 0.310562  | 2.943185  |
| 7 | -1.730935 | -0.449550 | 1.968742  |
| 1 | -0.846238 | -0.001310 | 2.199579  |
| 1 | -2.213733 | 0.171530  | 1.324152  |
| 1 | -2.285194 | -0.481963 | 2.818025  |
| 7 | 0.420254  | -2.447672 | 0.687438  |
| 1 | -0.389541 | -2.078885 | 1.185767  |
| 1 | 0.257303  | -2.240343 | -0.294538 |
| 1 | 0.410430  | -3.456949 | 0.792125  |
| 7 | -2.629848 | -1.486876 | -1.139766 |
| 1 | -2.570852 | -1.867391 | -0.200712 |
| 1 | -1.674512 | -1.279254 | -1.434156 |
| 1 | -2.990533 | -2.217321 | -1.743429 |

-----

Cartesian coordinates of : MP2\_AM9\_5

-----

Atomic number (AN) and Cartesian coordinates

| AN | X         | Y         | Z                       |
|----|-----------|-----------|-------------------------|
| 7  | -1.978610 | -0.075346 | -1.788846               |
| 1  | -0.985550 | -0.203446 | -1.983527               |
| 1  | -2.282720 | -0.869850 | -1.224445               |
| 1  | -2.466239 | -0.132625 | -2.677195               |
| 7  | 2.592941  | 1.723442  | 0.964902                |
| 1  | 3.014413  | 2.315096  | 1.672846                |
| 1  | 1.688335  | 1.405677  | 1.316679                |
| 1  | 2.396563  | 2.314068  | 0.163234                |
| 7  | 1.274833  | 0.086915  | -2.066113               |
| 1  | 1.728494  | 0.156371  | -2.971185               |
| 1  | 1.966769  | -0.273828 | -1.415042               |
| 1  | 1.043089  | 1.032271  | -1.762448               |
| 7  | 3.535364  | -1.170729 | 0.349676                |
| 1  | 3.809231  | -1.628669 | 1.213056N_NH3_N9_33.log |
| 1  | 3.386603  | -0.181121 | 0.566587                |
| 1  | 4.338011  | -1.230346 | -0.268517               |
| 7  | -0.261030 | 2.512844  | -0.743113               |
| 1  | -1.035843 | 2.002959  | -1.161422               |
| 1  | -0.221037 | 2.222668  | 0.229923                |
| 1  | -0.482269 | 3.501970  | -0.768320               |
| 7  | 0.594508  | -2.413565 | -0.112388               |
| 1  | 0.586661  | -3.427301 | -0.172263               |
| 1  | 0.370785  | -2.057433 | -1.037871               |
| 1  | 1.563774  | -2.136844 | 0.052511                |
| 7  | -0.128449 | 0.290235  | 1.803470                |
| 1  | -1.120323 | 0.505623  | 1.697564                |
| 1  | 0.011567  | 0.052424  | 2.780787                |
| 1  | 0.050561  | -0.559449 | 1.269942                |
| 7  | -3.112772 | 1.154360  | 0.950945                |
| 1  | -4.057354 | 0.810235  | 1.087874                |
| 1  | -2.847451 | 0.927604  | -0.007631               |
| 1  | -3.159970 | 2.164894  | 1.025578                |
| 7  | -2.522585 | -2.110140 | 0.586726                |
| 1  | -2.745779 | -1.442979 | 1.317798                |
| 1  | -1.517646 | -2.274264 | 0.625521                |
| 1  | -2.992086 | -2.979812 | 0.813150                |

-----

Cartesian coordinates of : MP2\_AM9\_6

-----

Atomic number (AN) and Cartesian coordinates

| AN | X        | Y         | Z        |
|----|----------|-----------|----------|
| 7  | 3.210755 | -0.861829 | 1.144928 |
| 1  | 4.115408 | -1.314829 | 1.212008 |

|   |           |           |           |
|---|-----------|-----------|-----------|
| 1 | 2.869052  | -0.963401 | 0.185674  |
| 1 | 2.576132  | -1.367886 | 1.752803  |
| 7 | 1.838804  | -0.821364 | -1.666154 |
| 1 | 1.201317  | -1.606249 | -1.556866 |
| 1 | 2.268156  | -0.905008 | -2.581626 |
| 1 | 1.263796  | 0.020102  | -1.678599 |
| 7 | -0.000066 | 1.933159  | -1.282616 |
| 1 | 0.820705  | 2.133684  | -0.708907 |
| 1 | -0.000098 | 2.606144  | -2.043010 |
| 1 | -0.820789 | 2.133681  | -0.708840 |
| 7 | 2.713383  | 2.144745  | 0.445646  |
| 1 | 3.343272  | 2.338816  | -0.326220 |
| 1 | 3.007238  | 1.249909  | 0.841734  |
| 1 | 2.882981  | 2.860269  | 1.144794  |
| 7 | -2.713420 | 2.144738  | 0.445806  |
| 1 | -2.883048 | 2.860169  | 1.145042  |
| 1 | -3.343287 | 2.338903  | -0.326054 |
| 1 | -3.007271 | 1.249846  | 0.841771  |
| 7 | -3.210727 | -0.861909 | 1.144840  |
| 1 | -2.576086 | -1.367936 | 1.752722  |
| 1 | -2.869010 | -0.963466 | 0.185590  |
| 1 | -4.115359 | -1.314951 | 1.211912  |
| 7 | 0.000011  | -2.839807 | 0.001918  |
| 1 | -0.000007 | -1.998458 | 0.583810  |
| 1 | 0.814726  | -3.391161 | 0.249563  |
| 1 | -0.814810 | -3.391077 | 0.249395  |
| 7 | -1.838743 | -0.821377 | -1.666234 |
| 1 | -1.201226 | -1.606245 | -1.557009 |
| 1 | -1.263764 | 0.020110  | -1.678637 |
| 1 | -2.268112 | -0.904981 | -2.581702 |
| 7 | 0.000005  | 0.001374  | 1.416530  |
| 1 | 0.000073  | 0.187350  | 2.415364  |
| 1 | -0.811491 | 0.486298  | 1.041364  |
| 1 | 0.811478  | 0.486261  | 1.041264  |

-----  
 Cartesian coordinates of :   MP2\_AM9\_7

-----  
 Atomic number (AN) and Cartesian coordinates

| AN | X         | Y         | Z         |
|----|-----------|-----------|-----------|
| 7  | -1.035885 | 2.166271  | 1.174505  |
| 1  | -0.169494 | 2.539461  | 0.782015  |
| 1  | -1.397108 | 2.865036  | 1.815938  |
| 1  | -0.786693 | 1.344165  | 1.723004  |
| 7  | -0.733402 | -0.919490 | 2.140290  |
| 1  | -0.945291 | -1.365536 | 3.026658  |
| 1  | -0.088809 | -1.530633 | 1.646438  |
| 1  | -1.598484 | -0.880473 | 1.602560  |
| 7  | 1.775665  | 2.764575  | -0.162571 |
| 1  | 1.738777  | 2.579472  | -1.159256 |
| 1  | 2.186470  | 1.938560  | 0.267774  |
| 1  | 2.409782  | 3.543196  | -0.021444 |
| 7  | 2.353879  | -0.032342 | 1.415628  |
| 1  | 2.186560  | -1.021747 | 1.233764  |
| 1  | 1.556749  | 0.270453  | 1.969521  |
| 1  | 3.174658  | 0.030511  | 2.009772  |
| 7  | -3.271982 | -0.007346 | 0.375711  |
| 1  | -2.719276 | 0.837874  | 0.518729  |
| 1  | -3.415457 | -0.084236 | -0.625664 |
| 1  | -4.182958 | 0.141795  | 0.796699  |
| 7  | -1.125471 | 1.145841  | -1.969009 |
| 1  | -0.124886 | 1.057103  | -2.137604 |
| 1  | -1.509170 | 1.742642  | -2.694043 |
| 1  | -1.231293 | 1.636231  | -1.082768 |
| 7  | -1.141568 | -1.956039 | -1.415403 |
| 1  | -1.831523 | -2.103086 | -0.683622 |
| 1  | -1.243779 | -0.973439 | -1.684788 |
| 1  | -1.440933 | -2.513760 | -2.209752 |
| 7  | 1.782739  | -0.134013 | -1.860314 |
| 1  | 2.575976  | -0.347211 | -2.454877 |

|   |          |           |           |
|---|----------|-----------|-----------|
| 1 | 2.118404 | -0.059510 | -0.902347 |
| 1 | 1.149184 | -0.927151 | -1.888549 |
| 7 | 1.349702 | -2.910679 | 0.304974  |
| 1 | 2.183406 | -3.037281 | -0.259976 |
| 1 | 0.583715 | -2.685588 | -0.334674 |
| 1 | 1.145735 | -3.814287 | 0.719809  |

-----

Cartesian coordinates of :     MP2\_AM9\_8

-----

Atomic number (AN) and Cartesian coordinates

| AN | X         | Y         | Z         |
|----|-----------|-----------|-----------|
| 7  | 0.901538  | 2.227867  | -0.770567 |
| 1  | 0.772264  | 3.023960  | -1.385976 |
| 1  | 0.531395  | 1.402192  | -1.245665 |
| 1  | 0.307192  | 2.380570  | 0.040148  |
| 7  | -0.139440 | -0.586345 | -1.804809 |
| 1  | -0.326303 | -0.884235 | -2.756973 |
| 1  | 0.668339  | -1.118253 | -1.477603 |
| 1  | -0.938837 | -0.878670 | -1.249569 |
| 7  | 3.655595  | 0.975132  | -0.180577 |
| 1  | 4.286544  | 1.077916  | -0.968939 |
| 1  | 4.125978  | 1.392839  | 0.615772  |
| 1  | 2.824897  | 1.542298  | -0.379490 |
| 7  | 2.516232  | -1.982221 | -0.582662 |
| 1  | 2.399039  | -2.406513 | 0.331680  |
| 1  | 2.973812  | -1.082051 | -0.427095 |
| 1  | 3.168396  | -2.568451 | -1.093478 |
| 7  | -2.720592 | 1.487430  | -1.064884 |
| 1  | -2.952130 | 0.500508  | -0.944627 |
| 1  | -1.903363 | 1.521732  | -1.665419 |
| 1  | -3.484154 | 1.927334  | -1.567013 |
| 7  | -1.448150 | 2.108014  | 1.719198  |
| 1  | -1.975039 | 1.988006  | 0.849401  |
| 1  | -1.586695 | 3.064428  | 2.029305  |
| 1  | -1.886429 | 1.515659  | 2.417392  |
| 7  | -3.219144 | -1.549114 | -0.227105 |
| 1  | -2.404379 | -1.955301 | 0.242412  |
| 1  | -3.905412 | -1.342415 | 0.491561  |
| 1  | -3.622964 | -2.277028 | -0.807625 |
| 7  | 1.017970  | -0.016270 | 1.865431  |
| 1  | 1.727396  | 0.164663  | 1.160705  |
| 1  | 0.346660  | 0.749471  | 1.806743  |
| 1  | 1.480939  | 0.068570  | 2.765016  |
| 7  | -0.561096 | -2.617331 | 1.017668  |
| 1  | -0.036774 | -1.808567 | 1.362811  |
| 1  | -0.000257 | -3.035048 | 0.282328  |
| 1  | -0.610499 | -3.293744 | 1.772350  |

-----

Cartesian coordinates of :     MP2\_AM9\_9

-----

Atomic number (AN) and Cartesian coordinates

| AN | X         | Y         | Z         |
|----|-----------|-----------|-----------|
| 7  | 0.199793  | -0.147473 | 1.601212  |
| 1  | 0.713210  | -0.292480 | 2.465611  |
| 1  | 0.692045  | -0.685536 | 0.889464  |
| 1  | -0.711080 | -0.589369 | 1.729765  |
| 7  | 4.344750  | -0.518056 | 0.794404  |
| 1  | 5.269424  | -0.474804 | 0.381147  |
| 1  | 4.472409  | -0.549015 | 1.799539  |
| 1  | 3.852375  | 0.346916  | 0.563202  |
| 7  | 2.330345  | 1.765447  | 0.026727  |
| 1  | 1.819203  | 1.506194  | -0.815939 |
| 1  | 1.667833  | 1.654147  | 0.788661  |
| 1  | 2.563717  | 2.749862  | -0.044394 |
| 7  | 0.051374  | 0.760165  | -2.117792 |
| 1  | -0.047505 | 1.040935  | -3.088292 |

|   |           |           |           |
|---|-----------|-----------|-----------|
| 1 | -0.486630 | 1.420305  | -1.559981 |
| 1 | -0.423262 | -0.135284 | -2.014782 |
| 7 | -2.920482 | -1.007755 | 1.888410  |
| 1 | -3.305836 | -0.491890 | 1.093096  |
| 1 | -3.490445 | -1.837205 | 2.019101  |
| 1 | -3.053031 | -0.439936 | 2.718991  |
| 7 | -3.402752 | 0.373025  | -0.841579 |
| 1 | -2.850557 | -0.352024 | -1.293255 |
| 1 | -2.803395 | 1.191834  | -0.769655 |
| 1 | -4.175765 | 0.607323  | -1.454261 |
| 7 | 1.924113  | -1.675909 | -0.894321 |
| 1 | 1.762011  | -0.843173 | -1.455567 |
| 1 | 2.167754  | -2.426929 | -1.532523 |
| 1 | 2.753174  | -1.497447 | -0.325487 |
| 7 | -1.231539 | -2.066527 | -0.898079 |
| 1 | -0.222124 | -2.123768 | -0.755486 |
| 1 | -1.650857 | -1.964759 | 0.022967  |
| 1 | -1.532931 | -2.964430 | -1.263136 |
| 7 | -1.239591 | 2.444716  | 0.396415  |
| 1 | -0.745546 | 1.691064  | 0.879353  |
| 1 | -2.016211 | 2.727114  | 0.985590  |
| 1 | -0.610051 | 3.238931  | 0.348501  |

-----

Cartesian coordinates of :     MP2\_AM9\_10

-----

Atomic number (AN) and Cartesian coordinates

| AN | X         | Y         | Z         |
|----|-----------|-----------|-----------|
| 7  | -2.367754 | -1.735885 | 0.364635  |
| 1  | -2.521297 | -2.716561 | 0.573496  |
| 1  | -1.703392 | -1.377530 | 1.046080  |
| 1  | -1.879986 | -1.693313 | -0.527849 |
| 7  | 1.287708  | -2.062434 | 0.759490  |
| 1  | 2.243995  | -1.723976 | 0.780787  |
| 1  | 1.244514  | -2.898879 | 1.331079  |
| 1  | 0.699672  | -1.351683 | 1.193971  |
| 7  | -0.413810 | 0.530664  | 1.682052  |
| 1  | -0.852575 | 0.944228  | 0.860097  |
| 1  | -0.953575 | 0.839525  | 2.484601  |
| 1  | 0.511179  | 0.948155  | 1.770153  |
| 7  | -1.850332 | 1.398954  | -1.190563 |
| 1  | -2.729174 | 1.323301  | -0.675619 |
| 1  | -1.653523 | 0.482574  | -1.588599 |
| 1  | -2.025522 | 2.032158  | -1.964715 |
| 7  | 2.834486  | 1.034266  | 1.830732  |
| 1  | 3.498985  | 1.756090  | 2.090150  |
| 1  | 2.752975  | 0.418554  | 2.633472  |
| 1  | 3.252163  | 0.490040  | 1.074831  |
| 7  | 3.546342  | -0.405803 | -0.938887 |
| 1  | 2.809318  | 0.233272  | -1.240569 |
| 1  | 3.295094  | -1.328671 | -1.277431 |
| 1  | 4.399495  | -0.141469 | -1.420304 |
| 7  | -4.434583 | 0.604515  | 0.477158  |
| 1  | -4.665586 | 0.841640  | 1.435306  |
| 1  | -3.931100 | -0.285178 | 0.483206  |
| 1  | -5.312070 | 0.466497  | -0.011457 |
| 7  | -0.045486 | -1.195763 | -1.987508 |
| 1  | 0.403667  | -1.691002 | -1.215727 |
| 1  | 0.066056  | -1.757989 | -2.824847 |
| 1  | 0.489618  | -0.341918 | -2.122687 |
| 7  | 1.309915  | 1.844607  | -1.042708 |
| 1  | 1.645282  | 1.896351  | -0.083327 |
| 1  | 0.289926  | 1.823605  | -0.993480 |
| 1  | 1.560467  | 2.720327  | -1.491432 |

-----

Cartesian coordinates of :     MP2\_AM9\_11

-----

Atomic number (AN) and Cartesian coordinates

| AN | X         | Y         | Z         |
|----|-----------|-----------|-----------|
| 7  | -3.558224 | 0.132316  | 1.428896  |
| 1  | -3.288163 | 0.444182  | 2.356045  |
| 1  | -3.042775 | -0.730062 | 1.232247  |
| 1  | -4.545469 | -0.096414 | 1.477120  |
| 7  | -1.637261 | -2.067276 | 0.397200  |
| 1  | -1.525033 | -1.836975 | -0.585035 |
| 1  | -1.630110 | -3.078566 | 0.473841  |
| 1  | -0.814801 | -1.704470 | 0.885994  |
| 7  | 0.717220  | -0.549774 | 1.813431  |
| 1  | 0.279732  | 0.356681  | 1.642954  |
| 1  | 0.861300  | -0.636864 | 2.814147  |
| 1  | 1.639087  | -0.527288 | 1.386163  |
| 7  | -0.936588 | 1.948771  | 0.714058  |
| 1  | -0.986816 | 2.960557  | 0.767252  |
| 1  | -1.886447 | 1.595548  | 0.799532  |
| 1  | -0.604478 | 1.708403  | -0.217804 |
| 7  | 1.815896  | -2.058527 | -1.045659 |
| 1  | 1.150176  | -2.488149 | -0.412256 |
| 1  | 2.218933  | -2.803475 | -1.603964 |
| 1  | 2.560222  | -1.668421 | -0.467533 |
| 7  | 3.983429  | -0.361024 | 0.594766  |
| 1  | 3.575327  | 0.553346  | 0.380941  |
| 1  | 4.788591  | -0.486426 | -0.009940 |
| 1  | 4.342111  | -0.325101 | 1.543170  |
| 7  | 0.275968  | 0.564139  | -2.022162 |
| 1  | 0.525863  | 0.818573  | -2.973124 |
| 1  | -0.723643 | 0.357561  | -2.035736 |
| 1  | 0.768299  | -0.307094 | -1.811673 |
| 7  | -2.942919 | 0.218762  | -1.772751 |
| 1  | -3.163355 | 0.392587  | -0.793553 |
| 1  | -3.455819 | -0.614456 | -2.041726 |
| 1  | -3.336151 | 0.984839  | -2.309459 |
| 7  | 2.309954  | 2.161075  | -0.097833 |
| 1  | 1.768223  | 2.452767  | 0.709369  |
| 1  | 1.642609  | 1.757652  | -0.757396 |
| 1  | 2.690278  | 3.001837  | -0.519212 |

Cartesian coordinates of : MP2\_AM9\_12

Atomic number (AN) and Cartesian coordinates

| AN | X         | Y         | Z         |
|----|-----------|-----------|-----------|
| 7  | -1.430766 | -1.124964 | -1.393679 |
| 1  | -1.715103 | -1.464153 | -2.307973 |
| 1  | -1.432393 | -0.108120 | -1.450759 |
| 1  | -2.184798 | -1.377789 | -0.751437 |
| 7  | -1.061521 | 2.167595  | -1.904255 |
| 1  | -1.101216 | 3.163380  | -1.711365 |
| 1  | -1.378884 | 2.055742  | -2.861913 |
| 1  | -0.075000 | 1.890545  | -1.869585 |
| 7  | 1.846553  | 1.162143  | -1.454665 |
| 1  | 1.876196  | 0.144830  | -1.467637 |
| 1  | 2.643361  | 1.487063  | -1.992332 |
| 1  | 1.996658  | 1.450929  | -0.488723 |
| 7  | 1.563448  | -2.155185 | -1.470878 |
| 1  | 1.748477  | -2.477390 | -2.415610 |
| 1  | 0.580428  | -1.871473 | -1.433162 |
| 1  | 1.651164  | -2.969291 | -0.870242 |
| 7  | 1.632266  | 1.893533  | 1.674807  |
| 1  | 2.145418  | 2.004270  | 2.542994  |
| 1  | 1.051524  | 2.718921  | 1.572208  |
| 1  | 1.009728  | 1.093448  | 1.789372  |
| 7  | 0.102036  | -0.912361 | 1.605246  |
| 1  | -0.260605 | -1.164262 | 0.688208  |
| 1  | -0.387003 | -1.489110 | 2.282421  |
| 1  | 1.086110  | -1.183013 | 1.625451  |
| 7  | 3.207918  | -1.010919 | 1.086808  |
| 1  | 3.298957  | -0.000336 | 1.110932  |

|   |           |           |          |
|---|-----------|-----------|----------|
| 1 | 3.004883  | -1.273642 | 0.125185 |
| 1 | 4.104745  | -1.408678 | 1.341558 |
| 7 | -2.175738 | 1.323481  | 1.078897 |
| 1 | -1.342227 | 0.875134  | 1.452322 |
| 1 | -1.953289 | 1.626495  | 0.131804 |
| 1 | -2.361573 | 2.151334  | 1.633873 |
| 7 | -3.713816 | -1.375486 | 0.801030 |
| 1 | -4.676466 | -1.332105 | 0.485382 |
| 1 | -3.406302 | -0.421701 | 1.004646 |
| 1 | -3.715446 | -1.895884 | 1.671209 |

-----

Cartesian coordinates of :   MP2\_AM9\_13

-----

Atomic number (AN) and Cartesian coordinates

| AN | X         | Y         | Z         |
|----|-----------|-----------|-----------|
| 7  | 2.728851  | 0.943416  | 1.493101  |
| 1  | 3.303333  | 0.185318  | 1.140865  |
| 1  | 3.339431  | 1.580866  | 1.992279  |
| 1  | 2.345044  | 1.434259  | 0.683364  |
| 7  | -3.463744 | -0.274934 | -1.084383 |
| 1  | -3.098382 | -0.936211 | -0.390979 |
| 1  | -3.456515 | -0.745814 | -1.983348 |
| 1  | -4.440606 | -0.109829 | -0.863217 |
| 7  | -2.035428 | -1.987866 | 1.070551  |
| 1  | -1.492994 | -1.264292 | 1.547205  |
| 1  | -1.349780 | -2.623217 | 0.673337  |
| 1  | -2.545275 | -2.507156 | 1.777611  |
| 7  | 1.236959  | -2.224733 | 0.565053  |
| 1  | 1.503405  | -3.077055 | 1.046295  |
| 1  | 0.952403  | -1.553404 | 1.273609  |
| 1  | 2.072586  | -1.850520 | 0.118812  |
| 7  | -2.115835 | 2.351672  | 0.108142  |
| 1  | -2.237502 | 3.169210  | -0.480931 |
| 1  | -2.680771 | 2.513871  | 0.935812  |
| 1  | -2.532383 | 1.559551  | -0.386031 |
| 7  | 1.029137  | 2.099958  | -0.903297 |
| 1  | 1.241140  | 2.868552  | -1.531057 |
| 1  | 0.159664  | 2.333286  | -0.426831 |
| 1  | 0.813253  | 1.287097  | -1.477460 |
| 7  | -0.125830 | -0.775868 | -1.874011 |
| 1  | -0.360915 | -1.283637 | -2.721080 |
| 1  | -0.980633 | -0.321628 | -1.562900 |
| 1  | 0.112428  | -1.464932 | -1.159122 |
| 7  | 3.131454  | -0.628704 | -1.498961 |
| 1  | 3.519189  | 0.304404  | -1.412844 |
| 1  | 2.170655  | -0.521382 | -1.817963 |
| 1  | 3.650775  | -1.101520 | -2.230701 |
| 7  | -0.302810 | 0.451785  | 2.187290  |
| 1  | 0.709427  | 0.586615  | 2.139671  |
| 1  | -0.585708 | 0.723759  | 3.123924  |
| 1  | -0.710554 | 1.130720  | 1.547286  |

-----

Cartesian coordinates of :   MP2\_AM9\_14

-----

Atomic number (AN) and Cartesian coordinates

| AN | X         | Y         | Z         |
|----|-----------|-----------|-----------|
| 7  | -0.512525 | -0.705245 | 1.892317  |
| 1  | -0.604587 | -0.935549 | 2.877063  |
| 1  | -0.071145 | -1.507259 | 1.436267  |
| 1  | -1.456982 | -0.650304 | 1.521069  |
| 7  | 0.816312  | -3.065179 | 0.187324  |
| 1  | 1.168043  | -3.951511 | 0.534664  |
| 1  | 1.615640  | -2.542335 | -0.174438 |
| 1  | 0.227994  | -3.278470 | -0.611400 |
| 7  | 0.043737  | -0.196903 | -1.508536 |
| 1  | -0.222138 | 0.645327  | -1.002062 |



|   |           |           |           |
|---|-----------|-----------|-----------|
| 1 | 0.932805  | -0.509677 | -1.127426 |
| 1 | 0.218171  | 0.076637  | -2.470257 |
| 7 | -1.098304 | 2.195091  | 0.495666  |
| 1 | -1.147845 | 3.093386  | 0.966442  |
| 1 | -0.721697 | 1.529432  | 1.167253  |
| 1 | -2.061138 | 1.903383  | 0.313977  |
| 7 | 2.318180  | 0.918591  | 1.323025  |
| 1 | 1.398308  | 0.566357  | 1.581993  |
| 1 | 2.190323  | 1.749137  | 0.745585  |
| 1 | 2.782552  | 1.209588  | 2.176349  |
| 7 | 1.590519  | 3.159330  | -0.870077 |
| 1 | 0.627820  | 2.882499  | -0.677196 |
| 1 | 1.824592  | 2.851072  | -1.806879 |
| 1 | 1.628172  | 4.172510  | -0.874750 |
| 7 | -2.471706 | -1.897336 | -0.704877 |
| 1 | -2.195896 | -2.607377 | -0.035082 |
| 1 | -2.917224 | -2.380874 | -1.477541 |
| 1 | -1.616582 | -1.459190 | -1.057094 |
| 7 | -3.916769 | 0.849008  | -0.093545 |
| 1 | -4.654727 | 0.798398  | 0.600343  |
| 1 | -3.568566 | -0.099859 | -0.244326 |
| 1 | -4.353189 | 1.151954  | -0.957559 |
| 7 | 3.265294  | -1.212589 | -0.662444 |
| 1 | 4.044578  | -1.785194 | -0.354001 |
| 1 | 3.113447  | -0.486802 | 0.046918  |
| 1 | 3.576109  | -0.748646 | -1.509887 |

-----

Cartesian coordinates of : MP2\_AM9\_15

-----

Atomic number (AN) and Cartesian coordinates

| AN | X         | Y         | Z         |
|----|-----------|-----------|-----------|
| 7  | 2.293677  | 2.354238  | 0.743724  |
| 1  | 1.428320  | 2.882631  | 0.752305  |
| 1  | 3.054787  | 3.012856  | 0.864381  |
| 1  | 2.375644  | 1.931745  | -0.179169 |
| 7  | -1.159784 | -1.668213 | 1.544605  |
| 1  | -1.593896 | -2.229358 | 2.270275  |
| 1  | -1.913256 | -1.236535 | 1.015087  |
| 1  | -0.687134 | -2.306287 | 0.908694  |
| 7  | -1.494913 | 1.679788  | 1.492762  |
| 1  | -1.438715 | 2.428974  | 2.173324  |
| 1  | -1.012869 | 1.982738  | 0.645949  |
| 1  | -0.986443 | 0.884813  | 1.868281  |
| 7  | -3.525263 | 0.088501  | -0.153366 |
| 1  | -3.875509 | 0.605141  | -0.953720 |
| 1  | -3.060882 | 0.759641  | 0.465626  |
| 1  | -4.341956 | -0.267038 | 0.333023  |
| 7  | 1.927507  | -0.676400 | 1.648318  |
| 1  | 2.450663  | -0.973627 | 2.466169  |
| 1  | 0.938797  | -0.810869 | 1.858759  |
| 1  | 2.082350  | 0.329201  | 1.554094  |
| 7  | 2.183923  | 0.164982  | -1.554115 |
| 1  | 2.399424  | -0.326944 | -0.690427 |
| 1  | 2.838881  | -0.141439 | -2.264959 |
| 1  | 1.252784  | -0.135808 | -1.833970 |
| 7  | 1.172572  | -3.035028 | -0.343841 |
| 1  | 1.318270  | -3.946147 | 0.078808  |
| 1  | 1.661961  | -3.051104 | -1.232582 |
| 1  | 1.636331  | -2.340535 | 0.244635  |
| 7  | -0.966007 | -1.020038 | -1.848992 |
| 1  | -1.263488 | -1.393604 | -2.745309 |
| 1  | -1.815499 | -0.832171 | -1.315523 |
| 1  | -0.473950 | -1.772812 | -1.369858 |
| 7  | -0.415795 | 2.195890  | -1.450932 |
| 1  | -1.006319 | 2.784739  | -2.029082 |
| 1  | -0.621978 | 1.225030  | -1.684328 |
| 1  | 0.542267  | 2.350723  | -1.747625 |

-----

Cartesian coordinates of : MP2\_AM9\_16

-----  
Atomic number (AN) and Cartesian coordinates

| AN | X         | Y         | Z         |
|----|-----------|-----------|-----------|
| 7  | 0.083021  | 0.653978  | -2.082166 |
| 1  | 0.171073  | 0.898706  | -3.063463 |
| 1  | -0.716449 | 0.026494  | -2.000705 |
| 1  | -0.154538 | 1.507617  | -1.580514 |
| 7  | -2.731506 | -0.994692 | 2.050487  |
| 1  | -3.590790 | -1.534160 | 2.058749  |
| 1  | -2.514296 | -0.791159 | 3.020324  |
| 1  | -2.923203 | -0.110380 | 1.574396  |
| 7  | -2.863742 | 1.296578  | -0.051841 |
| 1  | -2.681597 | 0.521687  | -0.686328 |
| 1  | -2.046781 | 1.903577  | -0.084880 |
| 1  | -3.643919 | 1.823861  | -0.428855 |
| 7  | 0.392156  | -0.522640 | 1.135764  |
| 1  | -0.528849 | -0.876644 | 1.389811  |
| 1  | 0.560799  | 0.292076  | 1.718438  |
| 1  | 0.314386  | -0.164849 | 0.187187  |
| 7  | -1.988637 | -1.688354 | -1.149199 |
| 1  | -1.118763 | -2.187367 | -1.343699 |
| 1  | -2.152316 | -1.769135 | -0.147552 |
| 1  | -2.734618 | -2.197397 | -1.612912 |
| 7  | 3.484716  | -0.983730 | 1.499089  |
| 1  | 3.933788  | -1.744316 | 1.001646  |
| 1  | 3.777090  | -1.050602 | 2.467508  |
| 1  | 2.476212  | -1.132191 | 1.465635  |
| 7  | 2.661557  | 1.584502  | -0.260472 |
| 1  | 3.406957  | 2.100787  | -0.715919 |
| 1  | 2.158157  | 1.077264  | -0.985155 |
| 1  | 3.106312  | 0.886468  | 0.336212  |
| 7  | 1.055564  | -2.426836 | -1.396468 |
| 1  | 1.702909  | -3.087379 | -1.810714 |
| 1  | 1.243522  | -2.382260 | -0.400129 |
| 1  | 1.254699  | -1.503542 | -1.771474 |
| 7  | -0.064767 | 3.045998  | 0.250778  |
| 1  | 0.893804  | 2.685399  | 0.235604  |
| 1  | -0.375167 | 3.028295  | 1.217396  |
| 1  | -0.016965 | 4.025518  | -0.012415 |

-----  
Cartesian coordinates of : MP2\_AM9\_17

-----  
Atomic number (AN) and Cartesian coordinates

| AN | X         | Y         | Z         |
|----|-----------|-----------|-----------|
| 7  | 1.105235  | -0.300084 | -1.741480 |
| 1  | 1.587176  | -0.197954 | -2.628968 |
| 1  | 1.263894  | 0.552347  | -1.209926 |
| 1  | 0.103046  | -0.342277 | -1.942641 |
| 7  | 1.111840  | 1.481035  | 1.016664  |
| 1  | 0.675390  | 0.584239  | 1.225180  |
| 1  | 0.931514  | 2.086034  | 1.811868  |
| 1  | 2.122443  | 1.329141  | 0.988084  |
| 7  | 4.204000  | 0.759301  | 0.721775  |
| 1  | 4.060885  | -0.210889 | 0.435746  |
| 1  | 4.729120  | 1.220517  | -0.013076 |
| 1  | 4.800463  | 0.751864  | 1.541934  |
| 7  | 3.231570  | -2.090692 | -0.226706 |
| 1  | 3.704228  | -2.721566 | -0.864895 |
| 1  | 2.447816  | -1.671373 | -0.730604 |
| 1  | 2.850435  | -2.665429 | 0.516824  |
| 7  | -0.377110 | -1.481717 | 0.945940  |
| 1  | 0.136417  | -1.449417 | 0.068197  |
| 1  | 0.018439  | -2.238694 | 1.494536  |
| 1  | -1.329852 | -1.754443 | 0.710883  |
| 7  | -3.677374 | -1.726279 | 0.593298  |
| 1  | -4.532893 | -1.756910 | 0.049203  |

|   |           |           |           |
|---|-----------|-----------|-----------|
| 1 | -3.564429 | -0.775969 | 0.954472  |
| 1 | -3.817019 | -2.345845 | 1.384426  |
| 7 | -2.049033 | -0.291731 | -1.885457 |
| 1 | -2.471553 | -0.941621 | -1.226516 |
| 1 | -2.167372 | 0.642005  | -1.499755 |
| 1 | -2.593713 | -0.339579 | -2.740046 |
| 7 | -2.500199 | 0.984173  | 1.505959  |
| 1 | -2.237399 | 1.593136  | 0.733228  |
| 1 | -2.738710 | 1.575845  | 2.294195  |
| 1 | -1.666856 | 0.454767  | 1.748920  |
| 7 | -1.058679 | 2.669933  | -0.932249 |
| 1 | -0.240683 | 2.365057  | -0.397812 |
| 1 | -1.174185 | 3.665614  | -0.772627 |
| 1 | -0.828358 | 2.563815  | -1.915039 |

-----

Cartesian coordinates of : MP2\_AM9\_18

-----

Atomic number (AN) and Cartesian coordinates

| AN | X         | Y         | Z         |
|----|-----------|-----------|-----------|
| 7  | -4.085507 | 0.193682  | -0.554128 |
| 1  | -3.306704 | 0.826757  | -0.723057 |
| 1  | -4.214756 | -0.367790 | -1.388045 |
| 1  | -4.922874 | 0.753924  | -0.441141 |
| 7  | 1.116121  | 0.093814  | 2.002285  |
| 1  | 1.603271  | -0.553908 | 1.387821  |
| 1  | 0.123458  | -0.128524 | 1.940257  |
| 1  | 1.409320  | -0.115464 | 2.950900  |
| 7  | 2.063082  | 0.910852  | -1.849624 |
| 1  | 1.793892  | 1.705320  | -1.273534 |
| 1  | 2.458493  | 1.283858  | -2.706074 |
| 1  | 1.202081  | 0.418680  | -2.093874 |
| 7  | -1.443232 | 1.910944  | 0.046794  |
| 1  | -0.482783 | 2.235760  | -0.048372 |
| 1  | -1.987139 | 2.715703  | 0.341971  |
| 1  | -1.456639 | 1.237890  | 0.811076  |
| 7  | -0.715916 | -0.559535 | -1.913686 |
| 1  | -1.153220 | 0.241423  | -1.462960 |
| 1  | -0.666808 | -1.307800 | -1.227160 |
| 1  | -1.325569 | -0.867872 | -2.662910 |
| 7  | 0.259946  | -2.965967 | 0.136709  |
| 1  | 0.247435  | -3.628774 | -0.632194 |
| 1  | 1.161221  | -2.485876 | 0.103525  |
| 1  | 0.255808  | -3.520196 | 0.987279  |
| 7  | -1.937795 | -0.945701 | 1.546091  |
| 1  | -1.426136 | -1.655652 | 1.024024  |
| 1  | -2.778437 | -0.725133 | 1.011819  |
| 1  | -2.244357 | -1.373866 | 2.413852  |
| 7  | 3.101214  | -1.452054 | -0.161600 |
| 1  | 3.490461  | -2.156133 | -0.781170 |
| 1  | 3.854156  | -1.189858 | 0.467187  |
| 1  | 2.887548  | -0.630588 | -0.739301 |
| 7  | 1.643110  | 2.892007  | 0.699493  |
| 1  | 2.634347  | 3.062005  | 0.565657  |
| 1  | 1.544501  | 2.026420  | 1.237423  |
| 1  | 1.292264  | 3.653403  | 1.270662  |

-----

Cartesian coordinates of : MP2\_AM9\_19

-----

Atomic number (AN) and Cartesian coordinates

| AN | X         | Y        | Z         |
|----|-----------|----------|-----------|
| 7  | 1.348179  | 0.105893 | 1.987703  |
| 1  | 1.671146  | 0.164363 | 2.948666  |
| 1  | 0.406578  | 0.498349 | 1.978555  |
| 1  | 1.935770  | 0.735467 | 1.440864  |
| 7  | 0.098106  | 1.768265 | -0.743539 |
| 1  | -0.157319 | 2.631280 | -1.212897 |

|   |           |           |           |
|---|-----------|-----------|-----------|
| 1 | 1.070553  | 1.863305  | -0.459013 |
| 1 | -0.452100 | 1.728699  | 0.111944  |
| 7 | -1.821005 | 0.957075  | 1.837048  |
| 1 | -2.019160 | -0.029356 | 1.974713  |
| 1 | -2.133298 | 1.441021  | 2.672944  |
| 1 | -2.421629 | 1.260414  | 1.065984  |
| 7 | -0.745812 | -1.376482 | -0.305306 |
| 1 | -0.285361 | -2.025350 | -0.936780 |
| 1 | -0.152496 | -1.338975 | 0.519526  |
| 1 | -0.641783 | -0.453412 | -0.724314 |
| 7 | -3.310922 | 1.416055  | -0.867188 |
| 1 | -2.561997 | 1.410895  | -1.552176 |
| 1 | -3.694815 | 0.469994  | -0.831999 |
| 1 | -4.034007 | 2.033380  | -1.219883 |
| 7 | -3.872669 | -1.627913 | -0.341118 |
| 1 | -4.282035 | -1.843873 | 0.561099  |
| 1 | -4.184426 | -2.349030 | -0.982157 |
| 1 | -2.856476 | -1.703593 | -0.254138 |
| 7 | 2.473489  | -2.463433 | 0.429724  |
| 1 | 2.111244  | -1.723817 | 1.034266  |
| 1 | 1.970493  | -3.315021 | 0.655317  |
| 1 | 3.441411  | -2.625555 | 0.686329  |
| 7 | 3.419682  | 1.658640  | -0.021016 |
| 1 | 3.319013  | 0.995386  | -0.794482 |
| 1 | 4.229734  | 1.379524  | 0.522794  |
| 1 | 3.644233  | 2.565124  | -0.418170 |
| 7 | 2.370401  | -0.410779 | -2.030291 |
| 1 | 2.579987  | -0.756280 | -2.959976 |
| 1 | 1.444061  | 0.005319  | -2.052589 |
| 1 | 2.336533  | -1.209508 | -1.396543 |

-----

Cartesian coordinates of : MP2\_AM9\_20

-----

Atomic number (AN) and Cartesian coordinates

| AN | X         | Y         | Z         |
|----|-----------|-----------|-----------|
| 7  | -2.238718 | 0.682334  | 1.805101  |
| 1  | -2.194766 | 0.534615  | 2.807894  |
| 1  | -2.102161 | -0.221764 | 1.355728  |
| 1  | -3.184968 | 0.978816  | 1.590483  |
| 7  | -1.508445 | -1.827707 | -0.158249 |
| 1  | -1.445346 | -1.284246 | -1.014961 |
| 1  | -1.556213 | -2.805890 | -0.426576 |
| 1  | -0.617774 | -1.701861 | 0.335512  |
| 7  | 1.152357  | -1.235537 | 1.370477  |
| 1  | 1.200398  | -0.228846 | 1.525429  |
| 1  | 1.140096  | -1.674540 | 2.285683  |
| 1  | 2.025620  | -1.517991 | 0.922765  |
| 7  | 0.642712  | 1.921840  | 1.143148  |
| 1  | 0.791827  | 2.895613  | 1.383103  |
| 1  | -0.326253 | 1.690053  | 1.359153  |
| 1  | 0.773441  | 1.826008  | 0.140121  |
| 7  | 3.898460  | -1.785013 | -0.196185 |
| 1  | 4.650911  | -2.188784 | 0.350690  |
| 1  | 3.990103  | -2.157652 | -1.134787 |
| 1  | 4.051250  | -0.775697 | -0.243417 |
| 7  | 3.661553  | 1.324938  | -0.226395 |
| 1  | 2.853852  | 1.313926  | -0.846947 |
| 1  | 4.276814  | 2.075901  | -0.518357 |
| 1  | 3.304425  | 1.562687  | 0.693591  |
| 7  | -4.457563 | -0.703904 | -0.466507 |
| 1  | -4.913683 | -1.231758 | -1.202514 |
| 1  | -5.113734 | -0.657488 | 0.305031  |
| 1  | -3.645769 | -1.236691 | -0.155852 |
| 7  | -2.073922 | 1.249983  | -1.463313 |
| 1  | -2.270919 | 1.977969  | -2.142715 |
| 1  | -1.812460 | 1.714569  | -0.598532 |
| 1  | -2.956831 | 0.777269  | -1.269226 |
| 7  | 1.009663  | 0.382817  | -1.771000 |
| 1  | 1.318047  | 0.190881  | -2.718662 |

```

1      0.002141      0.542203      -1.810412
1      1.159270      -0.465558      -1.231767

```

-----

Cartesian coordinates of :   MP2\_AM9\_21

-----

Atomic number (AN) and Cartesian coordinates

| AN | X         | Y         | Z         |
|----|-----------|-----------|-----------|
| 7  | 3.285972  | -0.010452 | 0.212858  |
| 1  | 4.287962  | -0.117019 | 0.328552  |
| 1  | 3.081301  | -0.105668 | -0.781560 |
| 1  | 2.842464  | -0.796661 | 0.685955  |
| 7  | 1.818487  | -0.113680 | -2.651911 |
| 1  | 1.727645  | -0.920151 | -3.259454 |
| 1  | 1.717862  | 0.709029  | -3.235794 |
| 1  | 1.042688  | -0.124352 | -1.987183 |
| 7  | -0.014317 | -0.063940 | -0.119887 |
| 1  | 0.258945  | 0.858128  | 0.209006  |
| 1  | -0.980029 | -0.210568 | 0.156770  |
| 1  | 0.543873  | -0.731440 | 0.406402  |
| 7  | 1.598782  | -2.520297 | 1.582368  |
| 1  | 0.764369  | -2.875863 | 1.108499  |
| 1  | 2.312121  | -3.238511 | 1.509718  |
| 1  | 1.372118  | -2.438143 | 2.568139  |
| 7  | 1.806619  | 2.682389  | 0.743625  |
| 1  | 2.077358  | 3.284172  | -0.028505 |
| 1  | 2.156568  | 3.130039  | 1.585426  |
| 1  | 2.344685  | 1.815109  | 0.632614  |
| 7  | -2.731368 | 1.284943  | -1.204677 |
| 1  | -2.342104 | 1.973061  | -0.556947 |
| 1  | -1.955457 | 0.934597  | -1.757762 |
| 1  | -3.352673 | 1.775392  | -1.838813 |
| 7  | -1.363394 | 3.050373  | 1.049487  |
| 1  | -0.350891 | 2.934789  | 0.976876  |
| 1  | -1.548204 | 4.045499  | 1.117846  |
| 1  | -1.648509 | 2.642037  | 1.933379  |
| 7  | -0.925774 | -3.120548 | -0.183188 |
| 1  | -1.248861 | -4.037827 | -0.471789 |
| 1  | -0.577208 | -2.654095 | -1.014823 |
| 1  | -1.745246 | -2.589488 | 0.117541  |
| 7  | -3.416111 | -1.221997 | 0.552422  |
| 1  | -4.242962 | -1.733551 | 0.261773  |
| 1  | -3.356525 | -0.385819 | -0.035144 |
| 1  | -3.593562 | -0.910227 | 1.501608  |

-----

Cartesian coordinates of :   MP2\_AM9\_22

-----

Atomic number (AN) and Cartesian coordinates

| AN | X         | Y         | Z         |
|----|-----------|-----------|-----------|
| 7  | -1.709679 | -1.910681 | -0.656425 |
| 1  | -2.356017 | -2.341285 | -1.308469 |
| 1  | -1.215490 | -1.169676 | -1.148237 |
| 1  | -2.261653 | -1.470388 | 0.075151  |
| 7  | -1.117005 | 1.716421  | -0.239070 |
| 1  | -0.762956 | 2.665287  | -0.303572 |
| 1  | -2.060664 | 1.715118  | -0.624742 |
| 1  | -0.535921 | 1.138277  | -0.846507 |
| 7  | 0.894010  | -0.327363 | -1.805546 |
| 1  | 1.146128  | -1.148326 | -1.260262 |
| 1  | 0.951299  | -0.595779 | -2.783055 |
| 1  | 1.620021  | 0.374334  | -1.652417 |
| 7  | 1.053786  | -3.144163 | 0.156202  |
| 1  | 1.242073  | -4.003145 | -0.350741 |
| 1  | 0.082477  | -2.886979 | -0.038734 |
| 1  | 1.104436  | -3.378136 | 1.142742  |
| 7  | 2.834649  | 2.122010  | -1.070107 |
| 1  | 3.831052  | 2.296116  | -0.989250 |

|   |           |           |           |
|---|-----------|-----------|-----------|
| 1 | 2.461903  | 2.873001  | -1.641650 |
| 1 | 2.433983  | 2.213388  | -0.132794 |
| 7 | 3.257803  | -0.834145 | 0.760797  |
| 1 | 3.474254  | -0.274705 | -0.058135 |
| 1 | 4.130419  | -1.225137 | 1.098229  |
| 1 | 2.669787  | -1.608849 | 0.456855  |
| 7 | -2.502414 | -0.080710 | 1.906140  |
| 1 | -1.899919 | 0.589756  | 1.423837  |
| 1 | -3.009937 | 0.421704  | 2.626848  |
| 1 | -1.903408 | -0.744964 | 2.385249  |
| 7 | -4.183769 | 0.881809  | -0.714989 |
| 1 | -3.913169 | 0.329535  | 0.095544  |
| 1 | -4.376876 | 0.240157  | -1.475446 |
| 1 | -5.055037 | 1.350616  | -0.493980 |
| 7 | 1.496666  | 1.638767  | 1.676223  |
| 1 | 0.531438  | 1.452206  | 1.417731  |
| 1 | 1.496931  | 1.998932  | 2.623651  |
| 1 | 2.006520  | 0.755330  | 1.669579  |

-----

Cartesian coordinates of : MP2\_AM9\_23

-----

Atomic number (AN) and Cartesian coordinates

| AN | X         | Y         | Z         |
|----|-----------|-----------|-----------|
| 7  | 3.112784  | -1.138388 | 1.415754  |
| 1  | 3.796561  | -0.692617 | 0.803058  |
| 1  | 3.616628  | -1.662744 | 2.122114  |
| 1  | 2.602926  | -0.398247 | 1.888123  |
| 7  | 0.103262  | 0.247294  | 1.827136  |
| 1  | 0.202732  | -0.552675 | 1.209913  |
| 1  | -0.771182 | 0.715375  | 1.594064  |
| 1  | 0.015996  | -0.111686 | 2.771912  |
| 7  | 1.026629  | -1.605380 | -0.879224 |
| 1  | 1.757688  | -1.625752 | -0.163026 |
| 1  | 1.299609  | -2.274274 | -1.592807 |
| 1  | 1.070019  | -0.684965 | -1.308433 |
| 7  | 1.751249  | 1.906620  | -0.383215 |
| 1  | 0.929121  | 1.757912  | -0.967535 |
| 1  | 1.467988  | 1.601778  | 0.547176  |
| 1  | 1.904670  | 2.908875  | -0.335267 |
| 7  | -2.809477 | 1.679593  | 1.228599  |
| 1  | -2.951278 | 2.659069  | 1.003076  |
| 1  | -3.496434 | 1.138705  | 0.697628  |
| 1  | -3.043084 | 1.580703  | 2.211413  |
| 7  | -1.969743 | -2.196329 | -0.072922 |
| 1  | -0.985433 | -2.059113 | -0.320929 |
| 1  | -2.035849 | -2.045294 | 0.929032  |
| 1  | -2.173278 | -3.178841 | -0.228714 |
| 7  | -4.418030 | -0.261126 | -0.631301 |
| 1  | -4.520206 | 0.065373  | -1.586028 |
| 1  | -3.638973 | -0.922489 | -0.612309 |
| 1  | -5.263011 | -0.777538 | -0.411784 |
| 7  | -1.096415 | 0.935560  | -1.574018 |
| 1  | -1.525632 | 1.144110  | -0.675119 |
| 1  | -1.298140 | -0.042200 | -1.757140 |
| 1  | -1.590352 | 1.478430  | -2.274667 |
| 7  | 4.484680  | 0.433200  | -0.918219 |
| 1  | 5.238372  | 1.109078  | -0.973817 |
| 1  | 3.603084  | 0.950191  | -0.870473 |
| 1  | 4.492889  | -0.088464 | -1.787582 |

-----

Cartesian coordinates of : MP2\_AM9\_24

-----

Atomic number (AN) and Cartesian coordinates

| AN | X         | Y        | Z         |
|----|-----------|----------|-----------|
| 7  | 0.366264  | 2.917391 | -0.109379 |
| 1  | -0.075392 | 3.298629 | 0.720818  |

|   |           |           |           |
|---|-----------|-----------|-----------|
| 1 | 1.078383  | 3.581339  | -0.394554 |
| 1 | 0.840836  | 2.058529  | 0.172560  |
| 7 | 1.614338  | -0.005209 | 0.136300  |
| 1 | 1.442050  | -0.922867 | 0.541909  |
| 1 | 2.621718  | 0.093686  | 0.018589  |
| 1 | 1.190258  | -0.019192 | -0.789120 |
| 7 | 0.165157  | -2.645565 | 1.595069  |
| 1 | -0.512629 | -3.316249 | 1.247900  |
| 1 | -0.354715 | -1.811992 | 1.871308  |
| 1 | 0.568407  | -3.045631 | 2.435711  |
| 7 | -2.783835 | 2.071951  | 0.318553  |
| 1 | -3.637744 | 2.617991  | 0.302986  |
| 1 | -2.970416 | 1.180059  | -0.135001 |
| 1 | -2.092653 | 2.558927  | -0.243660 |
| 7 | -0.894023 | 0.320550  | 2.178390  |
| 1 | -0.009194 | 0.489799  | 1.702194  |
| 1 | -0.759900 | 0.531949  | 3.161918  |
| 1 | -1.564607 | 0.997769  | 1.812560  |
| 7 | -0.227520 | -2.603523 | -1.650336 |
| 1 | 0.023751  | -3.298395 | -2.344269 |
| 1 | -0.033156 | -1.683546 | -2.039340 |
| 1 | 0.382611  | -2.728753 | -0.847931 |
| 7 | -2.656038 | -1.110281 | -0.268872 |
| 1 | -3.573727 | -1.525199 | -0.144874 |
| 1 | -2.067220 | -1.802453 | -0.733785 |
| 1 | -2.263191 | -0.955227 | 0.657102  |
| 7 | 4.852078  | 0.440381  | -0.018562 |
| 1 | 5.288257  | -0.183634 | 0.650537  |
| 1 | 5.294952  | 0.274862  | -0.915095 |
| 1 | 5.082507  | 1.387124  | 0.260261  |
| 7 | -0.609237 | 0.579704  | -2.215434 |
| 1 | -1.457012 | 0.212627  | -1.786560 |
| 1 | -0.825356 | 0.785678  | -3.185255 |
| 1 | -0.407108 | 1.466380  | -1.757012 |

-----

Cartesian coordinates of :   MP2\_AM9\_25

-----

Atomic number (AN) and Cartesian coordinates

| AN | X         | Y         | Z         |
|----|-----------|-----------|-----------|
| 7  | 4.627335  | 1.282559  | 0.566052  |
| 1  | 4.753452  | 0.711418  | 1.393729  |
| 1  | 5.383454  | 1.061615  | -0.071614 |
| 1  | 4.745937  | 2.249261  | 0.846366  |
| 7  | -0.855712 | 0.739923  | 2.025171  |
| 1  | -0.560292 | 1.128594  | 2.914681  |
| 1  | -1.106399 | -0.230445 | 2.191163  |
| 1  | -0.037710 | 0.721086  | 1.414791  |
| 7  | -1.384515 | -0.449518 | -1.662267 |
| 1  | -1.054004 | 0.480626  | -1.417825 |
| 1  | -0.558238 | -1.019545 | -1.847689 |
| 1  | -1.874631 | -0.352340 | -2.546267 |
| 7  | -0.485628 | 2.925015  | -1.116356 |
| 1  | -0.544794 | 3.394279  | -2.014024 |
| 1  | -1.439949 | 2.723760  | -0.809205 |
| 1  | -0.103538 | 3.599788  | -0.461611 |
| 7  | -2.358881 | -1.946942 | 0.947263  |
| 1  | -2.158351 | -1.462224 | 0.068028  |
| 1  | -2.724009 | -2.864406 | 0.713470  |
| 1  | -3.112591 | -1.444417 | 1.404438  |
| 7  | 1.076058  | -2.528595 | -1.889417 |
| 1  | 2.041783  | -2.519008 | -2.200159 |
| 1  | 1.075504  | -2.709824 | -0.882161 |
| 1  | 0.635818  | -3.319374 | -2.347787 |
| 7  | 1.523468  | 0.548599  | -0.191998 |
| 1  | 1.503696  | -0.202031 | -0.876976 |
| 1  | 2.496430  | 0.828145  | -0.078103 |
| 1  | 1.018012  | 1.330044  | -0.609603 |
| 7  | -3.106753 | 1.772105  | 0.103153  |
| 1  | -2.479285 | 1.472156  | 0.853115  |

|   |           |           |           |
|---|-----------|-----------|-----------|
| 1 | -3.928155 | 2.195708  | 0.519688  |
| 1 | -3.407938 | 0.938264  | -0.389341 |
| 7 | 0.846622  | -2.366468 | 1.183233  |
| 1 | 1.248522  | -2.818344 | 1.996971  |
| 1 | -0.162674 | -2.325290 | 1.318688  |
| 1 | 1.175994  | -1.404238 | 1.163396  |

-----

Cartesian coordinates of : MP2\_AM9\_26

-----

Atomic number (AN) and Cartesian coordinates

| AN | X         | Y         | Z         |
|----|-----------|-----------|-----------|
| 7  | 2.769293  | -2.171184 | -0.207811 |
| 1  | 3.205329  | -2.896946 | 0.352312  |
| 1  | 3.179238  | -2.239838 | -1.134098 |
| 1  | 3.072747  | -1.274457 | 0.181718  |
| 7  | -1.344677 | 2.378082  | -1.447853 |
| 1  | -1.828587 | 3.023988  | -2.062769 |
| 1  | -1.599229 | 1.436951  | -1.743701 |
| 1  | -1.743765 | 2.484810  | -0.514483 |
| 7  | -0.273205 | -3.296772 | -0.846795 |
| 1  | -0.146547 | -3.769904 | -1.735693 |
| 1  | -0.479727 | -4.020946 | -0.166614 |
| 1  | 0.633120  | -2.902699 | -0.591920 |
| 7  | -2.334312 | -0.827700 | -1.436692 |
| 1  | -2.867423 | -0.696338 | -0.581237 |
| 1  | -1.797023 | -1.687043 | -1.318233 |
| 1  | -2.998163 | -0.982681 | -2.187786 |
| 7  | 1.711107  | 2.806747  | -0.851520 |
| 1  | 1.817920  | 3.742667  | -0.472498 |
| 1  | 0.727540  | 2.715289  | -1.130119 |
| 1  | 2.258345  | 2.781807  | -1.706497 |
| 7  | 3.298676  | 0.682553  | 1.073881  |
| 1  | 2.862662  | 1.392256  | 0.483369  |
| 1  | 4.206422  | 1.038222  | 1.354181  |
| 1  | 2.734540  | 0.624053  | 1.915690  |
| 7  | 0.257303  | 0.008154  | 0.282083  |
| 1  | 0.930531  | -0.743226 | 0.163153  |
| 1  | -0.429669 | -0.100023 | -0.460830 |
| 1  | 0.756248  | 0.866269  | 0.064648  |
| 7  | -2.198545 | -1.368651 | 1.791479  |
| 1  | -1.296792 | -0.975271 | 1.523162  |
| 1  | -2.207101 | -1.466412 | 2.800692  |
| 1  | -2.248767 | -2.302207 | 1.399078  |
| 7  | -2.014496 | 1.907587  | 1.614215  |
| 1  | -2.685740 | 1.157652  | 1.749713  |
| 1  | -2.050639 | 2.505803  | 2.431958  |
| 1  | -1.103486 | 1.456512  | 1.589892  |

-----

Cartesian coordinates of : MP2\_AM9\_27

-----

Atomic number (AN) and Cartesian coordinates

| AN | X         | Y         | Z         |
|----|-----------|-----------|-----------|
| 7  | -1.027149 | 0.266870  | -2.007259 |
| 1  | -1.067639 | 0.192123  | -3.018530 |
| 1  | -1.680556 | 0.996445  | -1.720986 |
| 1  | -1.384242 | -0.608030 | -1.634239 |
| 7  | -2.529184 | 2.508651  | -0.377556 |
| 1  | -3.465186 | 2.793814  | -0.111356 |
| 1  | -1.986079 | 3.355998  | -0.503230 |
| 1  | -2.121136 | 2.010593  | 0.410429  |
| 7  | -0.726592 | 0.742429  | 1.711220  |
| 1  | -0.209921 | -0.106070 | 1.479766  |
| 1  | -0.174957 | 1.497410  | 1.301794  |
| 1  | -0.691212 | 0.850600  | 2.720213  |
| 7  | 1.049686  | -1.395575 | 0.011616  |
| 1  | 1.957123  | -1.722969 | -0.313717 |



|   |           |           |           |
|---|-----------|-----------|-----------|
| 1 | 0.697851  | -0.784696 | -0.722112 |
| 1 | 0.412393  | -2.192291 | 0.035796  |
| 7 | 1.077475  | 2.203667  | -0.403340 |
| 1 | 1.951094  | 1.750056  | -0.151225 |
| 1 | 1.315942  | 3.042608  | -0.920898 |
| 1 | 0.573017  | 1.581582  | -1.034054 |
| 7 | 2.979643  | 0.487094  | 1.639665  |
| 1 | 2.564402  | 1.247834  | 2.166349  |
| 1 | 3.620508  | 0.010659  | 2.265494  |
| 1 | 2.233767  | -0.168237 | 1.400270  |
| 7 | -3.275912 | -0.773439 | 0.469310  |
| 1 | -3.680841 | -0.208761 | -0.270202 |
| 1 | -4.016082 | -0.944787 | 1.141884  |
| 1 | -2.568555 | -0.197920 | 0.927905  |
| 7 | -1.487021 | -3.374524 | 0.048189  |
| 1 | -1.750883 | -3.946003 | -0.746879 |
| 1 | -2.171406 | -2.621459 | 0.131465  |
| 1 | -1.576089 | -3.962363 | 0.869699  |
| 7 | 4.018818  | -0.743323 | -1.121198 |
| 1 | 5.007859  | -0.959325 | -1.167052 |
| 1 | 3.875239  | -0.095062 | -0.349691 |
| 1 | 3.777245  | -0.264691 | -1.981412 |

-----

Cartesian coordinates of : MP2\_AM9\_28

-----

Atomic number (AN) and Cartesian coordinates

| AN | X         | Y         | Z         |
|----|-----------|-----------|-----------|
| 7  | -2.355651 | 0.114133  | 0.346911  |
| 1  | -1.966688 | 0.098669  | 1.283870  |
| 1  | -1.866828 | -0.606123 | -0.184107 |
| 1  | -3.335776 | -0.151670 | 0.418045  |
| 7  | -0.498369 | -1.819766 | -1.483627 |
| 1  | -0.955646 | -2.021019 | -2.366726 |
| 1  | 0.049050  | -2.639909 | -1.244687 |
| 1  | 0.159113  | -1.052783 | -1.644296 |
| 7  | 1.412224  | 0.702840  | -1.756623 |
| 1  | 0.732212  | 1.410595  | -1.478038 |
| 1  | 2.138527  | 0.699028  | -1.045507 |
| 1  | 1.848944  | 1.032927  | -2.611570 |
| 7  | -1.097543 | 2.590821  | -0.969122 |
| 1  | -1.327976 | 3.451937  | -0.484169 |
| 1  | -1.668032 | 1.840198  | -0.564284 |
| 1  | -1.394558 | 2.718449  | -1.931152 |
| 7  | 3.855253  | 0.911275  | 0.673633  |
| 1  | 4.420528  | 0.603171  | 1.458317  |
| 1  | 4.339209  | 1.705592  | 0.267820  |
| 1  | 2.966695  | 1.253012  | 1.054616  |
| 7  | 0.967642  | 1.549652  | 1.560903  |
| 1  | 0.713754  | 2.062579  | 2.398355  |
| 1  | 0.709599  | 0.571197  | 1.704737  |
| 1  | 0.392051  | 1.910290  | 0.804515  |
| 7  | 2.930628  | -1.969215 | -0.381489 |
| 1  | 2.572343  | -1.864467 | -1.324874 |
| 1  | 3.669610  | -2.663242 | -0.418376 |
| 1  | 3.356536  | -1.075717 | -0.132599 |
| 7  | 0.489796  | -1.584762 | 1.663814  |
| 1  | 1.299047  | -1.824169 | 1.088326  |
| 1  | -0.328600 | -1.848865 | 1.124424  |
| 1  | 0.512887  | -2.183167 | 2.483034  |
| 7  | -5.585600 | -0.483364 | 0.389759  |
| 1  | -6.058376 | -0.681064 | 1.264038  |
| 1  | -5.844731 | -1.214432 | -0.262427 |
| 1  | -5.961553 | 0.387677  | 0.033600  |

-----

Cartesian coordinates of : MP2\_AM9\_29

-----

Atomic number (AN) and Cartesian coordinates

| AN | X         | Y         | Z         |
|----|-----------|-----------|-----------|
| 7  | 2.679410  | -0.181549 | -1.965858 |
| 1  | 2.447841  | 0.509797  | -2.671939 |
| 1  | 3.524057  | -0.642126 | -2.288642 |
| 1  | 2.911900  | 0.321460  | -1.106104 |
| 7  | 3.193100  | 1.037819  | 0.913774  |
| 1  | 2.384021  | 0.662417  | 1.413274  |
| 1  | 3.274592  | 2.012604  | 1.185040  |
| 1  | 4.016345  | 0.572424  | 1.282486  |
| 7  | 0.371032  | 0.177301  | 1.980001  |
| 1  | -0.003234 | 0.006741  | 1.041973  |
| 1  | 0.164508  | 1.150499  | 2.189232  |
| 1  | -0.131157 | -0.400597 | 2.645202  |
| 7  | 1.515845  | -2.387631 | 0.266295  |
| 1  | 2.240015  | -3.078034 | 0.434246  |
| 1  | 1.520637  | -1.742864 | 1.051914  |
| 1  | 1.802851  | -1.839095 | -0.542220 |
| 7  | -1.536949 | -3.131653 | -0.225136 |
| 1  | -1.617191 | -3.586854 | -1.128943 |
| 1  | -1.863532 | -3.806548 | 0.459041  |
| 1  | -0.538278 | -2.987036 | -0.050544 |
| 7  | -3.186751 | -0.458047 | 0.720844  |
| 1  | -2.770566 | -1.326630 | 0.384324  |
| 1  | -4.018336 | -0.702262 | 1.247839  |
| 1  | -2.523512 | -0.054358 | 1.374382  |
| 7  | -0.445654 | -0.101508 | -1.004748 |
| 1  | -1.061745 | -0.905660 | -1.064212 |
| 1  | -0.939060 | 0.692214  | -1.401373 |
| 1  | 0.380249  | -0.295319 | -1.564338 |
| 7  | -2.805421 | 2.185863  | -0.999002 |
| 1  | -3.081994 | 1.316047  | -0.538561 |
| 1  | -3.250344 | 2.202931  | -1.910732 |
| 1  | -3.212711 | 2.948645  | -0.467912 |
| 7  | 0.172938  | 2.888467  | 0.333428  |
| 1  | -0.693366 | 2.693186  | -0.164716 |
| 1  | 0.870534  | 2.247731  | -0.030831 |
| 1  | 0.464625  | 3.827258  | 0.084927  |

Cartesian coordinates of : MP2\_AM9\_30

Atomic number (AN) and Cartesian coordinates

| AN | X         | Y         | Z         |
|----|-----------|-----------|-----------|
| 7  | 0.236256  | -1.878608 | 2.393520  |
| 1  | 0.727499  | -2.205194 | 1.554123  |
| 1  | 0.926372  | -1.820034 | 3.135899  |
| 1  | -0.404754 | -2.619614 | 2.660334  |
| 7  | -2.945847 | 0.200764  | -0.913003 |
| 1  | -3.878972 | -0.002141 | -1.256195 |
| 1  | -2.751957 | 1.177034  | -1.133077 |
| 1  | -2.970977 | 0.133527  | 0.105444  |
| 7  | 1.526844  | -2.591714 | -0.350751 |
| 1  | 2.127888  | -1.826007 | -0.649264 |
| 1  | 0.668901  | -2.537763 | -0.902908 |
| 1  | 1.993825  | -3.455578 | -0.605279 |
| 7  | -1.301787 | -2.375247 | -1.897695 |
| 1  | -1.270410 | -2.395882 | -2.911688 |
| 1  | -1.806773 | -1.527365 | -1.630988 |
| 1  | -1.876921 | -3.161040 | -1.612294 |
| 7  | -2.167821 | 0.315111  | 2.183278  |
| 1  | -1.408569 | -0.348384 | 2.336755  |
| 1  | -1.736956 | 1.221881  | 2.035892  |
| 1  | -2.701066 | 0.377556  | 3.043698  |
| 7  | 3.402179  | 0.114804  | -1.026745 |
| 1  | 3.609391  | 0.373794  | -1.985807 |
| 1  | 3.277046  | 0.981539  | -0.501080 |
| 1  | 4.237397  | -0.333694 | -0.664693 |
| 7  | -1.408820 | 3.054897  | -1.068001 |
| 1  | -0.737932 | 2.444745  | -0.604234 |

|   |           |           |           |
|---|-----------|-----------|-----------|
| 1 | -1.592326 | 3.846510  | -0.462383 |
| 1 | -0.971390 | 3.415937  | -1.908070 |
| 7 | 0.202703  | 0.490167  | -0.041525 |
| 1 | 0.997861  | 0.202146  | -0.607942 |
| 1 | 0.246389  | -0.100304 | 0.786890  |
| 1 | -0.630799 | 0.176166  | -0.534237 |
| 7 | 2.391471  | 2.611581  | 0.682112  |
| 1 | 1.485806  | 2.158640  | 0.562957  |
| 1 | 2.312206  | 3.563976  | 0.343551  |
| 1 | 2.582971  | 2.667263  | 1.676250  |

-----

Cartesian coordinates of :   MP2\_AM9\_31

-----

Atomic number (AN) and Cartesian coordinates

| AN | X         | Y         | Z         |
|----|-----------|-----------|-----------|
| 7  | 4.955957  | 0.645127  | 0.376947  |
| 1  | 4.681473  | -0.118404 | -0.239825 |
| 1  | 5.537345  | 1.282246  | -0.155496 |
| 1  | 5.538800  | 0.259923  | 1.111274  |
| 7  | 3.188049  | -1.318044 | -1.387484 |
| 1  | 3.090161  | -1.087718 | -2.369892 |
| 1  | 2.936985  | -2.294705 | -1.285267 |
| 1  | 2.512707  | -0.759810 | -0.864777 |
| 7  | -3.177284 | -1.867840 | -0.028122 |
| 1  | -3.043104 | -2.223778 | 0.912094  |
| 1  | -3.642455 | -2.598104 | -0.556513 |
| 1  | -2.253738 | -1.723063 | -0.435653 |
| 7  | -2.003718 | 0.618857  | 1.897789  |
| 1  | -2.207069 | 0.888909  | 2.854928  |
| 1  | -2.860983 | 0.231808  | 1.514763  |
| 1  | -1.341382 | -0.156454 | 1.939546  |
| 7  | -3.377878 | 1.032568  | -1.372823 |
| 1  | -3.593288 | 0.171044  | -0.872946 |
| 1  | -3.437124 | 1.791628  | -0.702779 |
| 1  | -4.109847 | 1.184071  | -2.058367 |
| 7  | -0.636031 | 2.746214  | -0.070595 |
| 1  | -0.706786 | 3.716249  | 0.215595  |
| 1  | -1.105076 | 2.658522  | -0.965390 |
| 1  | -1.150150 | 2.173751  | 0.600805  |
| 7  | 1.729710  | 0.777455  | 0.509856  |
| 1  | 1.205888  | 1.612866  | 0.243396  |
| 1  | 2.715595  | 1.022329  | 0.603898  |
| 1  | 1.398068  | 0.541867  | 1.440788  |
| 7  | -0.023197 | -1.934936 | 1.487300  |
| 1  | 0.963110  | -1.869619 | 1.713879  |
| 1  | -0.286259 | -2.907359 | 1.606763  |
| 1  | -0.118717 | -1.705188 | 0.499712  |
| 7  | -0.566889 | -0.586036 | -1.400425 |
| 1  | 0.185216  | -0.065733 | -0.949774 |
| 1  | -1.320551 | 0.075283  | -1.588292 |
| 1  | -0.209853 | -0.894121 | -2.299569 |

-----

Cartesian coordinates of :   MP2\_AM9\_32

-----

Atomic number (AN) and Cartesian coordinates

| AN | X         | Y         | Z         |
|----|-----------|-----------|-----------|
| 7  | 4.364471  | -0.226244 | 0.157281  |
| 1  | 3.682873  | 0.492738  | 0.405497  |
| 1  | 5.082491  | -0.214624 | 0.873848  |
| 1  | 4.810885  | 0.075928  | -0.702261 |
| 7  | -4.370688 | -0.448976 | 0.683965  |
| 1  | -5.044845 | -0.794739 | 1.357671  |
| 1  | -4.883239 | -0.245630 | -0.166664 |
| 1  | -3.712143 | -1.201840 | 0.483281  |
| 7  | -1.864040 | -2.392600 | 0.489709  |
| 1  | -1.059285 | -1.761177 | 0.503298  |

|   |           |           |           |
|---|-----------|-----------|-----------|
| 1 | -1.582744 | -3.197822 | -0.061285 |
| 1 | -1.983785 | -2.732307 | 1.439026  |
| 7 | -1.981701 | 0.115573  | -1.947720 |
| 1 | -2.513545 | 0.276508  | -2.795739 |
| 1 | -2.246984 | -0.794450 | -1.583869 |
| 1 | -2.279328 | 0.798920  | -1.257614 |
| 7 | -1.786396 | 1.365613  | 1.143391  |
| 1 | -1.673375 | 1.853249  | 2.025970  |
| 1 | -2.696514 | 0.904720  | 1.168231  |
| 1 | -1.076645 | 0.635904  | 1.102326  |
| 7 | 2.715876  | -2.895728 | -0.350619 |
| 1 | 3.348103  | -2.117406 | -0.155751 |
| 1 | 2.780219  | -3.551954 | 0.419311  |
| 1 | 3.057088  | -3.374563 | -1.176403 |
| 7 | 0.572633  | -0.527579 | -0.118164 |
| 1 | 1.143442  | -1.351428 | -0.310706 |
| 1 | 1.225377  | 0.215248  | 0.116197  |
| 1 | 0.114120  | -0.254488 | -0.985179 |
| 7 | -0.018400 | 2.837475  | -1.014096 |
| 1 | -0.231363 | 3.780026  | -1.322335 |
| 1 | -0.761180 | 2.537945  | -0.380334 |
| 1 | -0.079331 | 2.236867  | -1.830169 |
| 7 | 2.360891  | 2.196928  | 0.924984  |
| 1 | 3.061065  | 2.931680  | 0.944516  |
| 1 | 1.932334  | 2.187566  | 1.845218  |
| 1 | 1.637789  | 2.493888  | 0.262815  |

-----

Cartesian coordinates of : MP2\_AM9\_33

-----

Atomic number (AN) and Cartesian coordinates

| AN | X         | Y         | Z         |
|----|-----------|-----------|-----------|
| 7  | -1.634523 | 0.322020  | 2.099221  |
| 1  | -2.077923 | 0.843379  | 2.847453  |
| 1  | -2.137963 | -0.553089 | 2.003413  |
| 1  | -1.760535 | 0.839396  | 1.229935  |
| 7  | -1.613898 | 1.360898  | -0.900942 |
| 1  | -1.832276 | 0.435410  | -1.262703 |
| 1  | -0.593494 | 1.431559  | -0.903856 |
| 1  | -1.939377 | 2.033524  | -1.588923 |
| 7  | -3.126795 | -1.705124 | -1.014372 |
| 1  | -3.785396 | -1.002400 | -0.674300 |
| 1  | -3.320286 | -2.563765 | -0.509011 |
| 1  | -3.360932 | -1.889619 | -1.984680 |
| 7  | 1.508779  | 0.427814  | 1.760421  |
| 1  | 1.527438  | 1.034394  | 0.943818  |
| 1  | 2.048181  | 0.887370  | 2.486815  |
| 1  | 0.538875  | 0.396494  | 2.076596  |
| 7  | 3.517134  | -1.616460 | 0.435757  |
| 1  | 3.895273  | -2.365050 | 1.005315  |
| 1  | 3.049099  | -2.045103 | -0.355434 |
| 1  | 2.801998  | -1.129728 | 0.979043  |
| 7  | -4.629054 | 0.852641  | 0.110443  |
| 1  | -5.283643 | 1.429336  | -0.406689 |
| 1  | -4.915102 | 0.886047  | 1.082562  |
| 1  | -3.711824 | 1.289267  | 0.046877  |
| 7  | 0.133736  | -1.742941 | -0.438222 |
| 1  | -0.873555 | -1.679005 | -0.577277 |
| 1  | 0.366514  | -2.730179 | -0.417140 |
| 1  | 0.350824  | -1.367544 | 0.480758  |
| 7  | 1.475613  | 1.001315  | -1.494203 |
| 1  | 1.381947  | 1.240372  | -2.476220 |
| 1  | 2.461325  | 1.124762  | -1.258818 |
| 1  | 1.247611  | 0.011626  | -1.401171 |
| 7  | 4.555060  | 1.150759  | -0.570485 |
| 1  | 5.297342  | 1.144192  | -1.261104 |
| 1  | 4.453589  | 0.200573  | -0.209663 |
| 1  | 4.869917  | 1.741336  | 0.191075  |

-----

Cartesian coordinates of : MP2\_AM9\_34

-----  
Atomic number (AN) and Cartesian coordinates

| AN | X         | Y         | Z         |
|----|-----------|-----------|-----------|
| 7  | 0.507596  | -0.688693 | 1.817773  |
| 1  | -0.406488 | -1.145628 | 1.830140  |
| 1  | 0.888160  | -0.750179 | 2.756923  |
| 1  | 0.323206  | 0.295195  | 1.636027  |
| 7  | 0.474979  | 2.398823  | 0.270702  |
| 1  | 0.863785  | 3.036213  | 0.959011  |
| 1  | 0.132205  | 2.980282  | -0.488012 |
| 1  | 1.254081  | 1.844179  | -0.097336 |
| 7  | -2.387873 | -1.672545 | 1.138776  |
| 1  | -2.417875 | -1.852979 | 0.140475  |
| 1  | -2.597277 | -0.679463 | 1.268301  |
| 1  | -3.133788 | -2.209947 | 1.566968  |
| 7  | -2.596519 | 1.459103  | 1.250733  |
| 1  | -3.157724 | 1.547807  | 0.404230  |
| 1  | -1.662230 | 1.806108  | 1.045099  |
| 1  | -2.999043 | 2.067852  | 1.954739  |
| 7  | 2.531602  | 0.217173  | -0.559091 |
| 1  | 2.107383  | -0.334836 | 0.183460  |
| 1  | 2.307511  | -0.248378 | -1.432022 |
| 1  | 3.543457  | 0.189080  | -0.447859 |
| 7  | -4.007624 | 0.745683  | -1.480193 |
| 1  | -4.319864 | 1.123175  | -2.367720 |
| 1  | -3.093403 | 0.313261  | -1.627124 |
| 1  | -4.660777 | 0.013879  | -1.223561 |
| 7  | -0.981133 | -0.128917 | -1.618238 |
| 1  | -0.587338 | 0.265361  | -2.467191 |
| 1  | -0.531837 | -1.035516 | -1.481972 |
| 1  | -0.663179 | 0.462186  | -0.854415 |
| 7  | 5.774235  | 0.418570  | -0.182701 |
| 1  | 5.948890  | 1.406442  | -0.326839 |
| 1  | 6.375145  | -0.089194 | -0.821697 |
| 1  | 6.080625  | 0.192447  | 0.756574  |
| 7  | 0.476693  | -2.780907 | -0.615192 |
| 1  | 0.685832  | -2.227737 | 0.214334  |
| 1  | 1.335310  | -3.231023 | -0.912857 |
| 1  | -0.158455 | -3.516624 | -0.325661 |

-----  
Cartesian coordinates of : MP2\_AM9\_35

-----  
Atomic number (AN) and Cartesian coordinates

| AN | X         | Y         | Z         |
|----|-----------|-----------|-----------|
| 7  | -0.965244 | 2.687206  | -0.262247 |
| 1  | -1.479797 | 3.536729  | -0.469131 |
| 1  | 0.022558  | 2.879212  | -0.431415 |
| 1  | -1.237915 | 1.988788  | -0.949790 |
| 7  | 0.304121  | -3.402026 | -0.826174 |
| 1  | 0.478318  | -4.316855 | -0.425274 |
| 1  | -0.557831 | -3.041429 | -0.416488 |
| 1  | 0.144649  | -3.539827 | -1.817768 |
| 7  | -0.770614 | 0.754205  | 2.215644  |
| 1  | -0.185601 | 1.168540  | 2.934402  |
| 1  | -1.682253 | 0.607389  | 2.637382  |
| 1  | -0.890796 | 1.458406  | 1.482292  |
| 7  | -2.019836 | -1.958381 | 0.832636  |
| 1  | -2.770056 | -1.282243 | 0.684282  |
| 1  | -1.334275 | -1.468717 | 1.404187  |
| 1  | -2.404348 | -2.708712 | 1.398056  |
| 7  | 1.436012  | -0.498521 | 0.107299  |
| 1  | 2.364371  | -0.481148 | 0.525870  |
| 1  | 1.260031  | -1.461473 | -0.178584 |
| 1  | 0.765044  | -0.276751 | 0.841531  |
| 7  | -1.167710 | -0.181005 | -1.815208 |
| 1  | -0.206782 | -0.063447 | -1.495253 |

|   |           |           |           |
|---|-----------|-----------|-----------|
| 1 | -1.131507 | -0.369342 | -2.811937 |
| 1 | -1.496115 | -1.027895 | -1.357091 |
| 7 | 4.645949  | -0.408635 | 0.674259  |
| 1 | 4.876122  | -1.380219 | 0.500193  |
| 1 | 4.859841  | 0.110754  | -0.169309 |
| 1 | 5.268151  | -0.077190 | 1.402201  |
| 7 | 2.128380  | 2.408370  | -0.907523 |
| 1 | 1.935125  | 1.416795  | -0.753210 |
| 1 | 2.463184  | 2.523006  | -1.857532 |
| 1 | 2.887624  | 2.671808  | -0.289536 |
| 7 | -3.702727 | 0.641269  | 0.012054  |
| 1 | -3.470417 | 1.485523  | 0.524103  |
| 1 | -4.640148 | 0.760063  | -0.355431 |
| 1 | -3.055491 | 0.590874  | -0.771930 |

-----

Cartesian coordinates of :     MP2\_AM9\_36

-----

Atomic number (AN) and Cartesian coordinates

| AN | X         | Y         | Z         |
|----|-----------|-----------|-----------|
| 7  | -4.713318 | -1.373462 | 1.026193  |
| 1  | -4.477504 | -2.345529 | 1.189815  |
| 1  | -5.234035 | -1.050998 | 1.833798  |
| 1  | -5.345437 | -1.345525 | 0.234374  |
| 7  | 0.691419  | -2.033072 | 0.597262  |
| 1  | 0.491460  | -2.959398 | 0.961647  |
| 1  | 1.442855  | -1.654466 | 1.172503  |
| 1  | -0.137857 | -1.456226 | 0.762160  |
| 7  | 1.579510  | 1.752339  | 0.668754  |
| 1  | 0.692632  | 2.209270  | 0.880247  |
| 1  | 2.312785  | 2.368204  | 1.005884  |
| 1  | 1.635210  | 0.906299  | 1.229873  |
| 7  | -0.568040 | -1.662416 | -2.319409 |
| 1  | -1.511102 | -2.002469 | -2.165013 |
| 1  | -0.175266 | -2.220271 | -3.069857 |
| 1  | -0.036477 | -1.864898 | -1.472146 |
| 7  | -0.340024 | 1.482035  | -1.959050 |
| 1  | -0.415863 | 0.503508  | -2.242648 |
| 1  | 0.519360  | 1.568475  | -1.420013 |
| 1  | -0.228707 | 2.028842  | -2.806643 |
| 7  | -1.259500 | 3.291509  | 0.471359  |
| 1  | -2.202504 | 3.220143  | 0.837064  |
| 1  | -1.103202 | 4.270843  | 0.258591  |
| 1  | -1.228531 | 2.772075  | -0.406828 |
| 7  | -1.747228 | -0.046772 | 0.681233  |
| 1  | -1.612600 | 0.680492  | 1.376020  |
| 1  | -2.711152 | -0.366817 | 0.756862  |
| 1  | -1.631868 | 0.403033  | -0.223240 |
| 7  | 3.059508  | -0.531954 | -1.114594 |
| 1  | 2.313783  | -1.214432 | -1.004318 |
| 1  | 2.628423  | 0.379464  | -0.982568 |
| 1  | 3.396686  | -0.583865 | -2.068815 |
| 7  | 3.459784  | -0.842184 | 1.914613  |
| 1  | 3.880581  | -0.058664 | 2.402038  |
| 1  | 3.695772  | -0.760365 | 0.924222  |
| 1  | 3.907779  | -1.678879 | 2.272459  |

-----

Cartesian coordinates of :     MP2\_AM9\_37

-----

Atomic number (AN) and Cartesian coordinates

| AN | X         | Y         | Z         |
|----|-----------|-----------|-----------|
| 7  | -0.625877 | 2.362297  | 1.166296  |
| 1  | -0.917142 | 3.281745  | 0.849697  |
| 1  | -0.960874 | 2.267488  | 2.119836  |
| 1  | 0.398603  | 2.375406  | 1.211294  |
| 7  | 1.750705  | -3.165534 | -0.508123 |
| 1  | 1.973584  | -4.145145 | -0.647780 |

|   |           |           |           |
|---|-----------|-----------|-----------|
| 1 | 0.742226  | -3.099958 | -0.360001 |
| 1 | 1.946635  | -2.693169 | -1.384977 |
| 7 | -2.528878 | 0.163733  | -0.482178 |
| 1 | -3.518834 | 0.354470  | -0.337805 |
| 1 | -2.331327 | 0.350185  | -1.460286 |
| 1 | -1.997866 | 0.852565  | 0.049925  |
| 7 | -1.406321 | -2.724398 | 0.093059  |
| 1 | -2.006294 | -3.415131 | -0.346463 |
| 1 | -1.847229 | -1.810658 | -0.054797 |
| 1 | -1.439340 | -2.907461 | 1.090975  |
| 7 | 3.133214  | -1.135014 | 1.495531  |
| 1 | 4.145216  | -1.207108 | 1.477079  |
| 1 | 2.765761  | -1.912982 | 0.942655  |
| 1 | 2.847988  | -1.290953 | 2.456775  |
| 7 | 2.495183  | 2.135119  | 0.986846  |
| 1 | 2.758544  | 1.168954  | 1.175618  |
| 1 | 3.163160  | 2.725870  | 1.470243  |
| 1 | 2.627134  | 2.286303  | -0.013589 |
| 7 | 2.372379  | 2.044227  | -2.239444 |
| 1 | 1.794194  | 1.239064  | -1.990241 |
| 1 | 1.801756  | 2.675582  | -2.790658 |
| 1 | 3.118103  | 1.717913  | -2.843953 |
| 7 | 0.747754  | -0.086898 | -0.679864 |
| 1 | 0.245196  | 0.646571  | -0.186321 |
| 1 | 0.112648  | -0.877952 | -0.710821 |
| 1 | 1.506535  | -0.360470 | -0.060689 |
| 7 | -5.741899 | 0.469795  | 0.121418  |
| 1 | -5.947171 | 1.062472  | 0.917482  |
| 1 | -5.991106 | -0.477984 | 0.379661  |
| 1 | -6.363927 | 0.751089  | -0.627636 |

-----

Cartesian coordinates of : MP2\_AM9\_38

-----

Atomic number (AN) and Cartesian coordinates

| AN | X         | Y         | Z         |
|----|-----------|-----------|-----------|
| 7  | -5.236828 | 1.641724  | 0.118310  |
| 1  | -5.379421 | 2.643359  | 0.177024  |
| 1  | -5.769249 | 1.310351  | -0.677798 |
| 1  | -5.646690 | 1.230182  | 0.948747  |
| 7  | 1.264629  | 0.748561  | 1.716522  |
| 1  | 0.661652  | -0.018868 | 2.004661  |
| 1  | 0.988488  | 0.993766  | 0.768534  |
| 1  | 1.048672  | 1.539587  | 2.313347  |
| 7  | 3.386805  | 2.529562  | -0.450774 |
| 1  | 3.542110  | 2.510282  | 0.550528  |
| 1  | 3.497404  | 3.487592  | -0.761553 |
| 1  | 2.422728  | 2.253884  | -0.612076 |
| 7  | -2.192482 | 0.414470  | 0.079060  |
| 1  | -3.108729 | 0.857045  | 0.038069  |
| 1  | -1.498662 | 1.154752  | 0.060777  |
| 1  | -2.066124 | -0.127531 | -0.775145 |
| 7  | 0.881875  | 0.743791  | -1.561950 |
| 1  | 0.050482  | 0.892035  | -2.125278 |
| 1  | 0.856856  | -0.230419 | -1.264829 |
| 1  | 1.681096  | 0.831496  | -2.182502 |
| 7  | 0.986774  | -2.238284 | -0.190937 |
| 1  | 1.090189  | -3.244663 | -0.280560 |
| 1  | 1.934919  | -1.859644 | -0.123246 |
| 1  | 0.533053  | -2.066821 | 0.705823  |
| 7  | -1.420136 | -1.702492 | -2.228986 |
| 1  | -0.618893 | -1.940605 | -1.641612 |
| 1  | -1.088072 | -1.647998 | -3.185826 |
| 1  | -2.073214 | -2.477657 | -2.193031 |
| 7  | 3.686419  | -0.656393 | 0.270102  |
| 1  | 4.489558  | -1.102427 | 0.699690  |
| 1  | 3.141088  | -0.207403 | 1.005884  |
| 1  | 4.037385  | 0.094534  | -0.317919 |
| 7  | -1.112121 | -1.524109 | 2.239699  |
| 1  | -1.512271 | -2.452841 | 2.154733  |

```

1   -1.613012   -0.906081    1.592077
1   -1.315873   -1.213726    3.184153

```

-----

Cartesian coordinates of :   MP2\_AM9\_39

-----

Atomic number (AN) and Cartesian coordinates

| AN | X         | Y         | Z         |
|----|-----------|-----------|-----------|
| 7  | -3.711202 | -0.627244 | 0.344470  |
| 1  | -4.454669 | -0.026390 | -0.006317 |
| 1  | -4.160088 | -1.418779 | 0.793053  |
| 1  | -3.201430 | -0.994379 | -0.459989 |
| 7  | -0.025802 | -2.085677 | 0.774487  |
| 1  | 0.985358  | -1.976429 | 0.769074  |
| 1  | -0.235944 | -2.882388 | 1.366268  |
| 1  | -0.414415 | -1.262851 | 1.232159  |
| 7  | -1.376704 | 0.710313  | 1.912553  |
| 1  | -2.196648 | 0.308677  | 1.443588  |
| 1  | -1.644746 | 0.889307  | 2.875272  |
| 1  | -1.210616 | 1.617758  | 1.488359  |
| 7  | -1.680181 | -1.763964 | -1.866607 |
| 1  | -1.053921 | -1.956592 | -1.081094 |
| 1  | -1.795890 | -2.623580 | -2.391693 |
| 1  | -1.209806 | -1.108492 | -2.480826 |
| 7  | 5.026810  | 0.565032  | -1.021284 |
| 1  | 5.739790  | 0.868950  | -0.366850 |
| 1  | 5.472477  | 0.524152  | -1.931507 |
| 1  | 4.318993  | 1.302101  | -1.059582 |
| 7  | 1.906334  | 0.784044  | 1.608431  |
| 1  | 0.925227  | 0.599620  | 1.807832  |
| 1  | 2.305145  | -0.074010 | 1.230899  |
| 1  | 2.361318  | 0.956504  | 2.498636  |
| 7  | 2.613630  | 2.575558  | -0.844506 |
| 1  | 1.877168  | 2.492062  | -1.536750 |
| 1  | 2.295894  | 2.096704  | 0.002870  |
| 1  | 2.699394  | 3.563039  | -0.630355 |
| 7  | 3.180567  | -1.790357 | -0.019588 |
| 1  | 3.840252  | -1.088424 | -0.366025 |
| 1  | 2.698599  | -2.166899 | -0.829990 |
| 1  | 3.731335  | -2.550778 | 0.365978  |
| 7  | -5.866096 | 1.548676  | -0.847413 |
| 1  | -6.193227 | 1.308271  | -1.775881 |
| 1  | -5.274272 | 2.366362  | -0.936710 |
| 1  | -6.676770 | 1.821814  | -0.304228 |

-----

Cartesian coordinates of :   MP2\_AM9\_40

-----

Atomic number (AN) and Cartesian coordinates

| AN | X         | Y         | Z         |
|----|-----------|-----------|-----------|
| 7  | -1.798158 | 2.310632  | -0.607125 |
| 1  | -1.755846 | 3.210375  | -0.140489 |
| 1  | -2.354600 | 1.676755  | -0.026328 |
| 1  | -2.312023 | 2.459812  | -1.469111 |
| 7  | -3.100188 | -0.106806 | 0.847471  |
| 1  | -4.090642 | -0.339734 | 0.881838  |
| 1  | -2.682990 | -0.457816 | 1.702672  |
| 1  | -2.675469 | -0.620432 | 0.074512  |
| 7  | -1.363548 | -0.919250 | -1.696299 |
| 1  | -1.196755 | 0.075358  | -1.815964 |
| 1  | -0.472590 | -1.333974 | -1.422170 |
| 1  | -1.602548 | -1.295373 | -2.607423 |
| 7  | 2.881314  | 0.814739  | -1.918716 |
| 1  | 2.345176  | 1.026156  | -1.080921 |
| 1  | 2.704833  | 1.550453  | -2.593098 |
| 1  | 3.864237  | 0.854006  | -1.674334 |
| 7  | 3.698534  | 1.427563  | 1.531336  |
| 1  | 2.741459  | 1.395407  | 1.175482  |



|   |           |           |           |
|---|-----------|-----------|-----------|
| 1 | 3.670276  | 1.832495  | 2.460852  |
| 1 | 4.221924  | 2.075127  | 0.952629  |
| 7 | 1.631563  | -1.966788 | -1.015410 |
| 1 | 2.273704  | -2.041929 | -0.224195 |
| 1 | 1.597366  | -2.881574 | -1.453433 |
| 1 | 2.067456  | -1.322488 | -1.673326 |
| 7 | 3.719482  | -1.768407 | 1.421182  |
| 1 | 3.855998  | -0.758034 | 1.474146  |
| 1 | 3.447555  | -2.083060 | 2.346321  |
| 1 | 4.623479  | -2.186529 | 1.229540  |
| 7 | 0.763985  | 0.740791  | 0.587195  |
| 1 | 0.791155  | -0.217839 | 0.242411  |
| 1 | 0.439317  | 0.686421  | 1.548214  |
| 1 | 0.025286  | 1.224375  | 0.074764  |
| 7 | -6.344963 | -0.621318 | 0.811486  |
| 1 | -6.840931 | -0.528596 | 1.690292  |
| 1 | -6.632428 | -1.499564 | 0.395617  |
| 1 | -6.668542 | 0.122115  | 0.203665  |

-----

Cartesian coordinates of ammonia decamer: (NH<sub>3</sub>)<sub>10</sub>

Cartesian coordinates of : MP2\_AM10\_1

-----

Atomic number (AN) and Cartesian coordinates

| AN | X         | Y         | Z         |
|----|-----------|-----------|-----------|
| 7  | -1.778914 | -2.506157 | -0.000642 |
| 1  | -2.069687 | -1.718671 | 0.583928  |
| 1  | -2.359012 | -3.299981 | 0.253445  |
| 1  | -2.037321 | -2.244828 | -0.948145 |
| 7  | 2.415177  | 2.202391  | -1.309839 |
| 1  | 1.592098  | 1.635250  | -1.530878 |
| 1  | 3.004932  | 2.234306  | -2.134710 |
| 1  | 2.099685  | 3.151439  | -1.139401 |
| 7  | 0.111923  | 0.137570  | -1.299843 |
| 1  | 0.028263  | 0.218274  | -0.289590 |
| 1  | 0.559805  | -0.761841 | -1.460194 |
| 1  | -0.844879 | 0.053611  | -1.639501 |
| 7  | 1.204743  | -3.032575 | -1.120175 |
| 1  | 1.108362  | -3.569107 | -1.976158 |
| 1  | 0.279927  | -2.973566 | -0.690891 |
| 1  | 1.786102  | -3.583798 | -0.496998 |
| 7  | 0.711768  | -1.252445 | 2.022057  |
| 1  | 0.131552  | -1.862712 | 1.451131  |
| 1  | 0.895901  | -1.742526 | 2.891937  |
| 1  | 1.605709  | -1.142871 | 1.536639  |
| 7  | -3.149385 | 0.316852  | -1.526676 |
| 1  | -3.660922 | -0.215395 | -0.831145 |
| 1  | -3.813486 | 0.604417  | -2.237296 |
| 1  | -2.812072 | 1.155192  | -1.056225 |
| 7  | -1.408727 | 2.739448  | -0.219850 |
| 1  | -1.003318 | 2.687397  | -1.149813 |
| 1  | -0.633031 | 2.606101  | 0.435828  |
| 1  | -1.752755 | 3.686680  | -0.097722 |
| 7  | 3.128881  | -0.665898 | 0.103184  |
| 1  | 4.109165  | -0.919022 | 0.166017  |
| 1  | 3.087039  | 0.287278  | -0.252874 |
| 1  | 2.700049  | -1.274945 | -0.590224 |
| 7  | 1.020924  | 1.977144  | 1.625663  |
| 1  | 0.909782  | 1.020444  | 1.957988  |
| 1  | 1.263845  | 2.545617  | 2.430631  |
| 1  | 1.827993  | 1.975513  | 1.006682  |
| 7  | -2.217132 | 0.116547  | 1.726306  |
| 1  | -1.288235 | -0.060156 | 2.104522  |
| 1  | -2.836030 | 0.297176  | 2.509985  |
| 1  | -2.154267 | 0.980583  | 1.191745  |

-----

Cartesian coordinates of : MP2\_AM10\_2

-----  
Atomic number (AN) and Cartesian coordinates

| AN | X         | Y         | Z         |
|----|-----------|-----------|-----------|
| 7  | 1.853611  | 2.142494  | -1.151853 |
| 1  | 1.733223  | 1.934683  | -0.157296 |
| 1  | 2.768255  | 1.793590  | -1.419139 |
| 1  | 1.886399  | 3.151981  | -1.251270 |
| 7  | -1.853574 | 2.141952  | 1.152737  |
| 1  | -1.886365 | 3.151390  | 1.252651  |
| 1  | -2.768218 | 1.792915  | 1.419848  |
| 1  | -1.733183 | 1.934627  | 0.158077  |
| 7  | 1.160304  | 1.266940  | 1.799926  |
| 1  | 1.226970  | 0.251104  | 1.810645  |
| 1  | 0.173025  | 1.514109  | 1.721513  |
| 1  | 1.479517  | 1.595765  | 2.705379  |
| 7  | -1.839737 | -1.121650 | 1.881156  |
| 1  | -2.625351 | -0.871015 | 1.278568  |
| 1  | -1.452964 | -0.238016 | 2.201505  |
| 1  | -2.226564 | -1.587705 | 2.696178  |
| 7  | -1.160278 | 1.267789  | -1.799436 |
| 1  | -0.172993 | 1.514909  | -1.720939 |
| 1  | -1.226962 | 0.251959  | -1.810572 |
| 1  | -1.479509 | 1.597000  | -2.704743 |
| 7  | 1.839709  | -1.120784 | -1.881597 |
| 1  | 2.226582  | -1.586508 | -2.696786 |
| 1  | 1.452948  | -0.237022 | -2.201605 |
| 1  | 2.625294  | -0.870399 | -1.278865 |
| 7  | 1.231909  | -2.007704 | 1.293582  |
| 1  | 1.323287  | -2.073944 | 0.282361  |
| 1  | 1.508455  | -2.903010 | 1.683716  |
| 1  | 0.237586  | -1.891615 | 1.490348  |
| 7  | -1.231926 | -2.007057 | -1.294428 |
| 1  | -1.508473 | -2.902170 | -1.685004 |
| 1  | -0.237603 | -1.890872 | -1.491137 |
| 1  | -1.323304 | -2.073796 | -0.283240 |
| 7  | -3.826334 | -0.275264 | -0.485983 |
| 1  | -3.746295 | 0.686960  | -0.797216 |
| 1  | -4.755276 | -0.597350 | -0.734791 |
| 1  | -3.149039 | -0.807151 | -1.029345 |
| 7  | 3.826315  | -0.275526 | 0.485901  |
| 1  | 3.149104  | -0.807721 | 1.029064  |
| 1  | 3.746153  | 0.686562  | 0.797521  |
| 1  | 4.755308  | -0.597589 | 0.734547  |

-----  
Cartesian coordinates of : MP2\_AM10\_3-----  
Atomic number (AN) and Cartesian coordinates

| AN | X         | Y         | Z         |
|----|-----------|-----------|-----------|
| 7  | -1.549524 | -2.216868 | 1.024510  |
| 1  | -1.280739 | -1.378377 | 1.536226  |
| 1  | -2.217166 | -1.939213 | 0.306929  |
| 1  | -2.034887 | -2.828872 | 1.671410  |
| 7  | 2.546284  | -1.082522 | 1.410365  |
| 1  | 2.985993  | -1.619428 | 2.151737  |
| 1  | 3.294525  | -0.613065 | 0.909753  |
| 1  | 2.144564  | -1.758861 | 0.755205  |
| 7  | -2.867311 | 1.467462  | 0.618980  |
| 1  | -2.222555 | 2.109014  | 0.158511  |
| 1  | -2.306326 | 0.938659  | 1.281924  |
| 1  | -3.524455 | 2.024930  | 1.154123  |
| 7  | -0.091049 | 0.492911  | 2.257394  |
| 1  | -0.012436 | 1.401075  | 1.808913  |
| 1  | 0.789672  | 0.002738  | 2.080462  |
| 1  | -0.142936 | 0.665110  | 3.256844  |
| 7  | 1.030270  | -3.012646 | -0.576501 |
| 1  | 0.164476  | -2.911571 | -0.039038 |
| 1  | 0.839473  | -2.638207 | -1.500716 |

|   |           |           |           |
|---|-----------|-----------|-----------|
| 1 | 1.203247  | -4.005836 | -0.692970 |
| 7 | 2.377370  | 2.180097  | 0.271711  |
| 1 | 3.102305  | 2.887373  | 0.201871  |
| 1 | 2.461780  | 1.768149  | 1.195391  |
| 1 | 2.613766  | 1.442793  | -0.396018 |
| 7 | 2.760066  | -0.145538 | -1.877603 |
| 1 | 1.738648  | -0.184621 | -1.905935 |
| 1 | 3.085336  | -1.091206 | -1.705534 |
| 1 | 3.090386  | 0.115749  | -2.800545 |
| 7 | -0.429640 | 3.233634  | -0.711061 |
| 1 | 0.501342  | 2.954873  | -0.387915 |
| 1 | -0.369096 | 3.363649  | -1.716155 |
| 1 | -0.618461 | 4.150549  | -0.318498 |
| 7 | -3.542980 | -0.926736 | -1.266716 |
| 1 | -3.535459 | -0.679549 | -2.250704 |
| 1 | -3.502278 | -0.060465 | -0.723611 |
| 1 | -4.440566 | -1.364707 | -1.088618 |
| 7 | -0.262191 | -0.084973 | -1.186316 |
| 1 | -0.532003 | 0.889973  | -1.082734 |
| 1 | 0.049281  | -0.375880 | -0.263439 |
| 1 | -1.124505 | -0.598530 | -1.350215 |

-----

Cartesian coordinates of : MP2\_AM10\_4

-----

Atomic number (AN) and Cartesian coordinates

| AN | X         | Y         | Z         |
|----|-----------|-----------|-----------|
| 7  | -2.259961 | -0.994227 | 1.583528  |
| 1  | -1.745600 | -0.140969 | 1.793112  |
| 1  | -3.066372 | -0.719185 | 1.022021  |
| 1  | -2.621141 | -1.353949 | 2.461322  |
| 7  | 1.740196  | -2.795579 | -1.157701 |
| 1  | 1.919178  | -3.585522 | -1.767041 |
| 1  | 2.498526  | -2.132889 | -1.279361 |
| 1  | 0.884753  | -2.339665 | -1.470710 |
| 7  | 0.176426  | 1.169837  | 2.084826  |
| 1  | 0.860560  | 1.779499  | 1.638276  |
| 1  | 0.560409  | 0.225170  | 2.066910  |
| 1  | 0.126190  | 1.452301  | 3.058843  |
| 7  | 0.819240  | -2.030118 | 1.723071  |
| 1  | 0.984055  | -2.625197 | 2.528998  |
| 1  | 1.156207  | -2.534917 | 0.901438  |
| 1  | -0.191134 | -1.945038 | 1.617113  |
| 7  | -1.179632 | -1.355973 | -1.475608 |
| 1  | -1.401231 | -1.617187 | -0.514984 |
| 1  | -1.554675 | -0.414880 | -1.570747 |
| 1  | -1.737402 | -1.954812 | -2.077299 |
| 7  | 1.940170  | 3.045986  | 0.100682  |
| 1  | 2.868302  | 3.390186  | -0.122106 |
| 1  | 1.628174  | 2.482162  | -0.689473 |
| 1  | 1.336270  | 3.859161  | 0.155274  |
| 7  | 3.123632  | -0.074973 | 0.431838  |
| 1  | 2.466609  | -0.653756 | 0.954839  |
| 1  | 3.034493  | 0.870957  | 0.792005  |
| 1  | 4.057333  | -0.396852 | 0.664699  |
| 7  | -1.433394 | 1.850103  | -0.690837 |
| 1  | -0.588117 | 1.761295  | -1.252652 |
| 1  | -1.732649 | 2.817787  | -0.760986 |
| 1  | -1.138252 | 1.693359  | 0.273618  |
| 7  | -4.268484 | 0.348133  | -0.503608 |
| 1  | -3.415285 | 0.858061  | -0.733660 |
| 1  | -4.977496 | 1.026774  | -0.249190 |
| 1  | -4.593230 | -0.116193 | -1.344172 |
| 7  | 1.332984  | 0.716561  | -2.041685 |
| 1  | 1.723699  | 0.805261  | -2.974467 |
| 1  | 0.643090  | -0.031513 | -2.077325 |
| 1  | 2.076500  | 0.382301  | -1.425849 |

-----

Cartesian coordinates of : MP2\_AM10\_5

-----  
Atomic number (AN) and Cartesian coordinates

| AN | X         | Y         | Z         |
|----|-----------|-----------|-----------|
| 7  | -2.278186 | -1.556543 | 0.925435  |
| 1  | -2.609075 | -1.019783 | 0.128498  |
| 1  | -1.662732 | -0.942021 | 1.463223  |
| 1  | -3.087841 | -1.764163 | 1.500280  |
| 7  | -0.050267 | 0.257323  | 2.232423  |
| 1  | 0.736770  | -0.304296 | 1.901622  |
| 1  | 0.101734  | 0.439604  | 3.219190  |
| 1  | 0.008463  | 1.151187  | 1.752774  |
| 7  | 0.222817  | 2.332697  | -0.419069 |
| 1  | 0.161173  | 1.469993  | -0.956145 |
| 1  | 0.156346  | 3.102911  | -1.076696 |
| 1  | 1.158625  | 2.363369  | -0.011135 |
| 7  | -0.187490 | -0.773963 | -1.799275 |
| 1  | -1.149376 | -0.443577 | -1.701459 |
| 1  | -0.048054 | -1.475906 | -1.075542 |
| 1  | -0.160133 | -1.277183 | -2.681934 |
| 7  | 3.073201  | 1.805937  | 0.881708  |
| 1  | 3.869763  | 2.355137  | 1.184635  |
| 1  | 2.841381  | 1.162263  | 1.630816  |
| 1  | 3.358153  | 1.237805  | 0.087625  |
| 7  | 2.826267  | 0.284723  | -1.938883 |
| 1  | 3.282877  | -0.324857 | -2.609616 |
| 1  | 2.917681  | 1.229953  | -2.297330 |
| 1  | 1.829366  | 0.059975  | -1.949441 |
| 7  | 2.244991  | -1.477841 | 0.845953  |
| 1  | 1.610750  | -2.204010 | 0.512692  |
| 1  | 3.046522  | -1.945691 | 1.256456  |
| 1  | 2.584431  | -0.971682 | 0.031703  |
| 7  | -0.088095 | -3.583836 | 0.127304  |
| 1  | -0.916581 | -3.050992 | 0.411251  |
| 1  | -0.353448 | -4.160448 | -0.664554 |
| 1  | 0.133840  | -4.223340 | 0.883674  |
| 7  | -3.147875 | 0.544772  | -1.670120 |
| 1  | -4.080104 | 0.156346  | -1.771615 |
| 1  | -2.993360 | 1.124771  | -2.488713 |
| 1  | -3.158168 | 1.165316  | -0.855518 |
| 7  | -2.650395 | 2.185872  | 0.903481  |
| 1  | -1.687869 | 2.367212  | 0.613144  |
| 1  | -2.603592 | 1.536624  | 1.681750  |
| 1  | -3.042320 | 3.051499  | 1.257657  |

-----  
Cartesian coordinates of : MP2\_AM10\_6-----  
Atomic number (AN) and Cartesian coordinates

| AN | X         | Y         | Z         |
|----|-----------|-----------|-----------|
| 7  | 2.355934  | -0.993721 | -1.503491 |
| 1  | 1.372611  | -1.079643 | -1.759195 |
| 1  | 2.595977  | -0.004424 | -1.580700 |
| 1  | 2.890709  | -1.489610 | -2.209689 |
| 7  | -2.056551 | -0.793520 | 1.881727  |
| 1  | -2.408465 | -0.981131 | 2.815552  |
| 1  | -1.190068 | -0.258078 | 1.981376  |
| 1  | -1.773449 | -1.689345 | 1.493260  |
| 7  | -0.801306 | -1.818899 | -1.719816 |
| 1  | -0.744374 | -2.547768 | -2.424239 |
| 1  | -1.788061 | -1.573064 | -1.627015 |
| 1  | -0.505965 | -2.229536 | -0.834915 |
| 7  | -3.652222 | -0.672723 | -0.958680 |
| 1  | -3.698324 | 0.290053  | -1.273573 |
| 1  | -3.388143 | -0.655779 | 0.024275  |
| 1  | -4.584346 | -1.064152 | -1.032826 |
| 7  | 0.827077  | -2.400413 | 0.997914  |
| 1  | 1.533400  | -2.139109 | 0.312099  |
| 1  | 0.764018  | -1.623776 | 1.649222  |

|   |           |           |           |
|---|-----------|-----------|-----------|
| 1 | 1.170163  | -3.204819 | 1.511687  |
| 7 | -0.502221 | 1.440644  | -1.462894 |
| 1 | -0.558152 | 1.910136  | -2.361804 |
| 1 | -0.558571 | 0.439813  | -1.653784 |
| 1 | -1.343282 | 1.700794  | -0.947387 |
| 7 | 3.513343  | -0.100034 | 1.378209  |
| 1 | 3.249968  | -0.524081 | 0.489153  |
| 1 | 4.363585  | 0.428360  | 1.213903  |
| 1 | 3.757313  | -0.852077 | 2.013747  |
| 7 | 2.605353  | 2.122711  | -1.074509 |
| 1 | 2.848334  | 2.286836  | -0.103587 |
| 1 | 2.900714  | 2.937463  | -1.600930 |
| 1 | 1.587646  | 2.061708  | -1.127163 |
| 7 | 0.529748  | 1.014126  | 1.676520  |
| 1 | 0.318693  | 1.285958  | 0.717614  |
| 1 | 1.515139  | 0.745453  | 1.694879  |
| 1 | 0.449856  | 1.850556  | 2.246684  |
| 7 | -2.807010 | 2.138915  | 0.683422  |
| 1 | -2.369587 | 2.837597  | 1.274340  |
| 1 | -2.692874 | 1.234142  | 1.137313  |
| 1 | -3.799488 | 2.347923  | 0.672887  |

-----

Cartesian coordinates of :     MP2\_AM10\_7

-----

Atomic number (AN) and Cartesian coordinates

| AN | X         | Y         | Z         |
|----|-----------|-----------|-----------|
| 7  | 0.205348  | 1.949186  | 2.048020  |
| 1  | 0.572998  | 2.609819  | 2.724684  |
| 1  | 0.249859  | 2.378243  | 1.122776  |
| 1  | -0.777360 | 1.818910  | 2.264783  |
| 7  | -1.084826 | -0.040034 | -2.438719 |
| 1  | -1.408769 | 0.037887  | -3.397812 |
| 1  | -0.108315 | -0.331632 | -2.475614 |
| 1  | -1.612862 | -0.800224 | -2.005987 |
| 7  | 3.006665  | 0.737379  | 0.637616  |
| 1  | 3.821081  | 1.289520  | 0.887387  |
| 1  | 3.224888  | -0.235917 | 0.859745  |
| 1  | 2.256301  | 1.011592  | 1.269519  |
| 7  | 2.153513  | -0.520546 | -2.173739 |
| 1  | 2.599957  | -1.428557 | -2.254076 |
| 1  | 2.559711  | -0.060697 | -1.357301 |
| 1  | 2.439951  | 0.015336  | -2.986967 |
| 7  | 0.657096  | 2.469249  | -1.009892 |
| 1  | 0.853571  | 3.259461  | -1.614981 |
| 1  | 0.088034  | 1.810891  | -1.539118 |
| 1  | 1.540686  | 2.004913  | -0.813109 |
| 7  | -2.473015 | 1.688605  | -0.033615 |
| 1  | -1.950453 | 2.558155  | 0.007546  |
| 1  | -3.418364 | 1.931511  | -0.313615 |
| 1  | -2.061048 | 1.159657  | -0.803329 |
| 7  | -2.744067 | -0.700388 | 2.001480  |
| 1  | -2.618893 | 0.180628  | 1.498964  |
| 1  | -3.497140 | -0.576418 | 2.669154  |
| 1  | -1.901546 | -0.884666 | 2.535748  |
| 7  | 0.223313  | -1.018961 | 0.528182  |
| 1  | 0.644532  | -0.759567 | -0.359566 |
| 1  | -0.744143 | -1.242274 | 0.318723  |
| 1  | 0.217116  | -0.174082 | 1.095781  |
| 7  | -2.824400 | -2.213955 | -0.765220 |
| 1  | -2.485982 | -3.167923 | -0.691382 |
| 1  | -3.749059 | -2.269935 | -1.179525 |
| 1  | -2.941119 | -1.860564 | 0.186910  |
| 7  | 2.899681  | -2.384666 | 1.252450  |
| 1  | 1.904990  | -2.177374 | 1.134408  |
| 1  | 3.047017  | -2.668585 | 2.214835  |
| 1  | 3.119209  | -3.189201 | 0.675476  |

-----

Cartesian coordinates of :     MP2\_AM10\_8

-----  
Atomic number (AN) and Cartesian coordinates

| AN | X         | Y         | Z         |
|----|-----------|-----------|-----------|
| 7  | 0.212674  | -1.852673 | 1.922468  |
| 1  | 0.127680  | -2.525938 | 2.676914  |
| 1  | -0.576263 | -1.210786 | 1.992744  |
| 1  | 0.105925  | -2.363467 | 1.049202  |
| 7  | -2.574496 | 1.748951  | -1.218137 |
| 1  | -3.349584 | 2.386136  | -1.371123 |
| 1  | -1.765691 | 2.311608  | -0.946988 |
| 1  | -2.342018 | 1.347841  | -2.122265 |
| 7  | 1.498124  | 1.110515  | 1.922470  |
| 1  | 2.123687  | 1.373539  | 2.676916  |
| 1  | 1.993859  | 1.273467  | 1.049204  |
| 1  | 1.336702  | 0.106332  | 1.992745  |
| 7  | 0.180066  | 3.161761  | -0.218428 |
| 1  | 1.083316  | 2.822809  | -0.547724 |
| 1  | 0.200765  | 3.028915  | 0.788731  |
| 1  | 0.153734  | 4.161163  | -0.394372 |
| 7  | -1.710797 | 0.742154  | 1.922471  |
| 1  | -2.251365 | 1.152393  | 2.676917  |
| 1  | -2.099784 | 1.089998  | 1.049205  |
| 1  | -0.760438 | 1.104450  | 1.992747  |
| 7  | -2.828199 | -1.424936 | -0.218428 |
| 1  | -2.723501 | -1.340587 | 0.788731  |
| 1  | -3.680541 | -1.947442 | -0.394372 |
| 1  | -2.986282 | -0.473224 | -0.547727 |
| 7  | -0.227389 | -3.104054 | -1.218137 |
| 1  | -1.119067 | -2.684936 | -0.946989 |
| 1  | 0.003744  | -2.702165 | -2.122265 |
| 1  | -0.391664 | -4.093892 | -1.371125 |
| 7  | 2.801885  | 1.355104  | -1.218136 |
| 1  | 2.884757  | 0.373329  | -0.946988 |
| 1  | 2.338275  | 1.354328  | -2.122265 |
| 1  | 3.741248  | 1.707758  | -1.371121 |
| 7  | 0.000000  | 0.000000  | -1.474831 |
| 1  | -0.818779 | -0.456189 | -1.085177 |
| 1  | 0.014318  | 0.937180  | -1.085179 |
| 1  | 0.804462  | -0.480988 | -1.085178 |
| 7  | 2.648132  | -1.736823 | -0.218430 |
| 1  | 1.902966  | -2.349584 | -0.547725 |
| 1  | 2.522736  | -1.688326 | 0.788730  |
| 1  | 3.526805  | -2.213719 | -0.394375 |

-----  
Cartesian coordinates of : MP2\_AM10\_9-----  
Atomic number (AN) and Cartesian coordinates

| AN | X         | Y         | Z         |
|----|-----------|-----------|-----------|
| 7  | 1.299126  | 2.762190  | 0.912476  |
| 1  | 1.883162  | 1.932319  | 1.047626  |
| 1  | 1.715548  | 3.296892  | 0.156608  |
| 1  | 1.399390  | 3.332151  | 1.746763  |
| 7  | -1.532233 | 1.294599  | 1.650667  |
| 1  | -2.021662 | 1.842551  | 2.350509  |
| 1  | -2.157120 | 1.209646  | 0.852931  |
| 1  | -0.723789 | 1.838824  | 1.352226  |
| 7  | 2.943991  | 0.111224  | 1.490237  |
| 1  | 3.482289  | -0.447137 | 0.835600  |
| 1  | 2.098334  | -0.426402 | 1.702613  |
| 1  | 3.492019  | 0.167115  | 2.342832  |
| 7  | 0.207812  | -1.349698 | 1.930886  |
| 1  | -0.069638 | -1.821642 | 1.074237  |
| 1  | -0.395537 | -0.528426 | 2.004481  |
| 1  | -0.025058 | -1.969662 | 2.700013  |
| 7  | -3.316868 | 0.948670  | -1.210685 |
| 1  | -3.710485 | 0.246747  | -1.829449 |
| 1  | -3.794723 | 1.819226  | -1.419928 |

|   |           |           |           |
|---|-----------|-----------|-----------|
| 1 | -2.337683 | 1.064185  | -1.481346 |
| 7 | 2.182844  | -2.528492 | -0.662303 |
| 1 | 1.181658  | -2.375862 | -0.800839 |
| 1 | 2.434171  | -3.386182 | -1.142541 |
| 1 | 2.318567  | -2.696965 | 0.328915  |
| 7 | -0.841482 | -1.735725 | -1.236346 |
| 1 | -1.017057 | -2.195271 | -2.124328 |
| 1 | -0.726980 | -0.743324 | -1.433452 |
| 1 | -1.689043 | -1.835439 | -0.675827 |
| 7 | 2.632210  | 0.362829  | -1.903095 |
| 1 | 3.262469  | 0.378368  | -2.698101 |
| 1 | 2.596430  | -0.598841 | -1.560316 |
| 1 | 3.067631  | 0.911123  | -1.168283 |
| 7 | -0.261044 | 1.594932  | -1.758132 |
| 1 | -0.104776 | 2.110175  | -0.894013 |
| 1 | -0.406615 | 2.285730  | -2.489015 |
| 1 | 0.637533  | 1.147383  | -1.961753 |
| 7 | -3.297362 | -1.537785 | 0.799087  |
| 1 | -2.803821 | -1.334655 | 1.661511  |
| 1 | -4.144817 | -2.038525 | 1.041823  |
| 1 | -3.559347 | -0.643309 | 0.390967  |

-----

Cartesian coordinates of : MP2\_AM10\_10

-----

Atomic number (AN) and Cartesian coordinates

| AN | X         | Y         | Z         |
|----|-----------|-----------|-----------|
| 7  | -3.524983 | -1.649080 | 0.212491  |
| 1  | -4.082430 | -2.493980 | 0.277028  |
| 1  | -3.972502 | -0.948978 | 0.794563  |
| 1  | -2.618179 | -1.835515 | 0.637331  |
| 7  | -1.955501 | 0.706683  | 2.082976  |
| 1  | -1.607276 | -0.244493 | 1.984291  |
| 1  | -2.071913 | 0.892905  | 3.073200  |
| 1  | -1.211922 | 1.307493  | 1.733715  |
| 7  | 0.009804  | 2.013691  | -0.136950 |
| 1  | 0.597945  | 1.437773  | -0.738687 |
| 1  | -0.933016 | 1.992803  | -0.524070 |
| 1  | 0.342015  | 2.968955  | -0.227244 |
| 7  | -1.566625 | -0.658530 | -2.126501 |
| 1  | -1.731103 | 0.343824  | -2.166278 |
| 1  | -2.324962 | -1.032004 | -1.553444 |
| 1  | -1.697464 | -1.020157 | -3.066332 |
| 7  | 1.662861  | -0.195683 | -1.938401 |
| 1  | 2.173804  | -0.926447 | -1.440790 |
| 1  | 0.687197  | -0.486739 | -1.998842 |
| 1  | 2.017489  | -0.179419 | -2.889908 |
| 7  | 3.263866  | -2.000384 | 0.143617  |
| 1  | 2.779658  | -1.412205 | 0.820943  |
| 1  | 4.258556  | -1.884503 | 0.304662  |
| 1  | 3.044234  | -2.966561 | 0.359358  |
| 7  | 3.811718  | 1.523155  | -0.241804 |
| 1  | 3.819958  | 2.529525  | -0.366994 |
| 1  | 4.686517  | 1.176061  | -0.619808 |
| 1  | 3.064008  | 1.143281  | -0.822365 |
| 7  | 1.849430  | 0.312281  | 1.902336  |
| 1  | 1.851523  | 0.412010  | 2.912501  |
| 1  | 1.096865  | 0.896609  | 1.539833  |
| 1  | 2.705634  | 0.737270  | 1.545703  |
| 7  | -0.352436 | -1.801911 | 0.737082  |
| 1  | -0.078038 | -2.779090 | 0.753865  |
| 1  | 0.432734  | -1.269640 | 1.110302  |
| 1  | -0.451682 | -1.534341 | -0.240339 |
| 7  | -3.219579 | 1.754405  | -0.619573 |
| 1  | -3.711479 | 2.638289  | -0.540350 |
| 1  | -3.067597 | 1.397479  | 0.324818  |
| 1  | -3.848457 | 1.107395  | -1.083561 |

-----

Cartesian coordinates of : MP2\_AM10\_11

-----  
Atomic number (AN) and Cartesian coordinates

| AN | X         | Y         | Z         |
|----|-----------|-----------|-----------|
| 7  | -0.058406 | -1.541382 | -1.847638 |
| 1  | -0.845942 | -0.894369 | -1.831530 |
| 1  | 0.784755  | -0.971114 | -1.812416 |
| 1  | -0.069262 | -1.986992 | -2.759919 |
| 7  | -2.833619 | -1.059789 | 0.647032  |
| 1  | -2.791917 | -0.793932 | -0.334314 |
| 1  | -3.799840 | -1.287259 | 0.859926  |
| 1  | -2.296239 | -1.922866 | 0.750450  |
| 7  | -2.211352 | 0.973293  | -1.860041 |
| 1  | -1.321080 | 1.412665  | -2.079653 |
| 1  | -2.559435 | 1.478679  | -1.046228 |
| 1  | -2.840788 | 1.165728  | -2.632767 |
| 7  | -2.672632 | 2.044048  | 1.205319  |
| 1  | -1.894115 | 2.352366  | 1.778227  |
| 1  | -2.698144 | 1.024543  | 1.260604  |
| 1  | -3.516877 | 2.398319  | 1.642400  |
| 7  | -0.721666 | -3.374306 | 0.630419  |
| 1  | -0.398065 | -2.893112 | -0.211339 |
| 1  | 0.010204  | -3.310481 | 1.328912  |
| 1  | -0.850489 | -4.355822 | 0.412130  |
| 7  | 0.206435  | 2.545879  | -0.504575 |
| 1  | 0.253253  | 1.815009  | 0.205665  |
| 1  | 0.973230  | 3.188031  | -0.334163 |
| 1  | -0.657524 | 3.052199  | -0.339535 |
| 7  | 0.209088  | 0.028808  | 1.628163  |
| 1  | 0.151917  | -0.022456 | 2.641626  |
| 1  | 0.875564  | -0.689271 | 1.338160  |
| 1  | -0.706416 | -0.265841 | 1.291681  |
| 7  | 2.458373  | 0.645906  | -1.656751 |
| 1  | 2.939559  | 1.057115  | -0.856305 |
| 1  | 1.637969  | 1.231227  | -1.801573 |
| 1  | 3.058338  | 0.756105  | -2.468002 |
| 7  | 2.485160  | -1.854638 | 0.382857  |
| 1  | 2.092685  | -2.688430 | -0.041400 |
| 1  | 3.432650  | -2.085437 | 0.663375  |
| 1  | 2.545189  | -1.153561 | -0.355369 |
| 7  | 3.071549  | 1.557825  | 1.325902  |
| 1  | 3.166114  | 2.466950  | 1.765399  |
| 1  | 3.678019  | 0.923493  | 1.834448  |
| 1  | 2.116176  | 1.239006  | 1.476701  |

-----  
Cartesian coordinates of : MP2\_AM10\_12-----  
Atomic number (AN) and Cartesian coordinates

| AN | X         | Y         | Z         |
|----|-----------|-----------|-----------|
| 7  | -2.558442 | -2.142245 | 0.809889  |
| 1  | -1.603791 | -2.487903 | 0.696527  |
| 1  | -2.968205 | -2.630944 | 1.599361  |
| 1  | -3.078313 | -2.433173 | -0.011889 |
| 7  | -0.662620 | -1.256595 | -2.150681 |
| 1  | -0.566525 | -1.915468 | -1.382559 |
| 1  | -0.863278 | -1.792496 | -2.988794 |
| 1  | -1.482987 | -0.678904 | -1.951470 |
| 7  | 0.541401  | -2.843802 | 0.694035  |
| 1  | 0.660620  | -2.424414 | 1.611317  |
| 1  | 1.253661  | -2.417547 | 0.095766  |
| 1  | 0.779355  | -3.826598 | 0.786190  |
| 7  | 2.443662  | -1.264077 | -1.279735 |
| 1  | 2.807249  | -0.371197 | -0.956920 |
| 1  | 1.597239  | -1.069345 | -1.812503 |
| 1  | 3.129146  | -1.648816 | -1.921163 |
| 7  | -3.059018 | 0.522680  | -1.040401 |
| 1  | -3.089695 | -0.071413 | -0.215530 |
| 1  | -2.788373 | 1.454060  | -0.727993 |



|   |           |           |           |
|---|-----------|-----------|-----------|
| 1 | -4.005484 | 0.595430  | -1.398787 |
| 7 | -0.746403 | 0.497891  | 1.848436  |
| 1 | 0.229979  | 0.195927  | 1.847113  |
| 1 | -1.002278 | 0.617763  | 2.824032  |
| 1 | -1.316544 | -0.267322 | 1.492750  |
| 7 | 0.351877  | 1.674294  | -1.140358 |
| 1 | -0.285532 | 2.366078  | -1.523009 |
| 1 | -0.028658 | 1.436344  | -0.226718 |
| 1 | 0.216351  | 0.839414  | -1.707170 |
| 7 | -2.046378 | 3.160111  | 0.609279  |
| 1 | -1.368596 | 3.901748  | 0.470703  |
| 1 | -1.577052 | 2.401436  | 1.105700  |
| 1 | -2.768312 | 3.533600  | 1.215633  |
| 7 | 2.421558  | -0.187581 | 1.911320  |
| 1 | 2.771789  | -1.091957 | 1.611740  |
| 1 | 2.875503  | 0.021327  | 2.795099  |
| 1 | 2.777476  | 0.481630  | 1.227743  |
| 7 | 3.302762  | 1.919594  | -0.381826 |
| 1 | 3.935916  | 1.979464  | -1.172646 |
| 1 | 3.495176  | 2.731015  | 0.196641  |
| 1 | 2.345370  | 2.010374  | -0.738878 |

-----

Cartesian coordinates of : MP2\_AM10\_13

-----

Atomic number (AN) and Cartesian coordinates

| AN | X         | Y         | Z         |
|----|-----------|-----------|-----------|
| 7  | -0.521268 | -0.340147 | -2.460664 |
| 1  | 0.431352  | -0.190824 | -2.122631 |
| 1  | -0.694124 | -1.337218 | -2.384376 |
| 1  | -0.531561 | -0.112273 | -3.449819 |
| 7  | 0.679180  | 3.111821  | -0.708599 |
| 1  | 1.058163  | 2.620031  | -1.512476 |
| 1  | 0.749374  | 4.103128  | -0.915370 |
| 1  | -0.318382 | 2.882918  | -0.678555 |
| 7  | 2.473652  | -0.136362 | -1.206128 |
| 1  | 2.607109  | -1.069492 | -0.826121 |
| 1  | 2.723306  | 0.502927  | -0.446868 |
| 1  | 3.175620  | -0.016678 | -1.930579 |
| 7  | 2.695220  | 1.780778  | 1.294405  |
| 1  | 2.180537  | 1.324050  | 2.040335  |
| 1  | 2.025049  | 2.367546  | 0.791684  |
| 1  | 3.378698  | 2.391728  | 1.728580  |
| 7  | -2.230589 | 1.936681  | -0.807117 |
| 1  | -1.845742 | 1.136039  | -1.307122 |
| 1  | -2.663834 | 1.602109  | 0.052140  |
| 1  | -2.963842 | 2.336463  | -1.382597 |
| 7  | 2.189539  | -1.838695 | 1.655228  |
| 1  | 1.467861  | -1.121470 | 1.759818  |
| 1  | 2.153115  | -2.440373 | 2.471561  |
| 1  | 3.085826  | -1.363231 | 1.684051  |
| 7  | -0.062019 | 0.174076  | 1.107412  |
| 1  | -0.489435 | 1.066153  | 1.338421  |
| 1  | -0.833327 | -0.458645 | 0.907985  |
| 1  | 0.400931  | 0.326990  | 0.214858  |
| 7  | 0.468878  | -3.149315 | -0.701182 |
| 1  | 0.437272  | -4.153822 | -0.555108 |
| 1  | 1.084398  | -2.768600 | 0.021195  |
| 1  | 0.942705  | -3.010943 | -1.588338 |
| 7  | -2.419735 | -1.888866 | -0.033570 |
| 1  | -2.700561 | -1.322519 | -0.828019 |
| 1  | -3.100169 | -2.636499 | 0.058601  |
| 1  | -1.529725 | -2.326124 | -0.280787 |
| 7  | -3.294375 | 0.497181  | 1.947128  |
| 1  | -4.274975 | 0.440556  | 2.199228  |
| 1  | -2.775363 | 0.586779  | 2.813855  |
| 1  | -3.029654 | -0.388768 | 1.518062  |

-----

Cartesian coordinates of : MP2\_AM10\_14

-----  
Atomic number (AN) and Cartesian coordinates

| AN | X         | Y         | Z         |
|----|-----------|-----------|-----------|
| 7  | -3.171998 | -0.983940 | -1.361690 |
| 1  | -3.923336 | -1.037131 | -2.040630 |
| 1  | -2.360516 | -0.604804 | -1.839578 |
| 1  | -3.439630 | -0.300380 | -0.651379 |
| 7  | 3.328072  | -0.828369 | -0.955312 |
| 1  | 2.781016  | -0.266600 | -1.605674 |
| 1  | 4.207304  | -1.048825 | -1.410322 |
| 1  | 3.541447  | -0.234825 | -0.160211 |
| 7  | 1.039043  | 0.552784  | -2.755436 |
| 1  | 0.428494  | 0.289841  | -1.975292 |
| 1  | 1.020783  | -0.199578 | -3.435890 |
| 1  | 0.636852  | 1.366671  | -3.208173 |
| 7  | -1.660446 | -3.164457 | 0.297656  |
| 1  | -1.432138 | -4.002291 | -0.227608 |
| 1  | -2.284676 | -2.603039 | -0.287518 |
| 1  | -2.198666 | -3.467069 | 1.103069  |
| 7  | 2.244945  | 0.268927  | 2.275932  |
| 1  | 1.562976  | 0.601202  | 2.950901  |
| 1  | 3.136406  | 0.250032  | 2.761694  |
| 1  | 2.002735  | -0.703902 | 2.060576  |
| 7  | -3.532667 | 1.013226  | 1.091039  |
| 1  | -3.308486 | 0.456001  | 1.908574  |
| 1  | -4.389831 | 1.511693  | 1.304667  |
| 1  | -2.793627 | 1.709110  | 0.982713  |
| 7  | -1.213102 | 3.160973  | 0.468052  |
| 1  | -1.594534 | 3.609206  | -0.359539 |
| 1  | -0.220710 | 2.989082  | 0.275739  |
| 1  | -1.244668 | 3.857135  | 1.206648  |
| 7  | 1.524108  | -2.509623 | 1.072003  |
| 1  | 1.925087  | -3.389731 | 1.378019  |
| 1  | 2.023847  | -2.225089 | 0.229238  |
| 1  | 0.553237  | -2.695763 | 0.825094  |
| 7  | 1.810416  | 2.459557  | -0.084083 |
| 1  | 2.063592  | 1.803158  | 0.655485  |
| 1  | 2.522075  | 3.182589  | -0.102177 |
| 1  | 1.878587  | 1.957253  | -0.965628 |
| 7  | -0.349215 | -0.053628 | -0.082940 |
| 1  | 0.509815  | -0.058488 | 0.458593  |
| 1  | -0.850952 | -0.899597 | 0.173301  |
| 1  | -0.886570 | 0.746002  | 0.238767  |

-----  
Cartesian coordinates of : MP2\_AM10\_15-----  
Atomic number (AN) and Cartesian coordinates

| AN | X         | Y         | Z         |
|----|-----------|-----------|-----------|
| 7  | -1.905646 | 1.192009  | -1.694300 |
| 1  | -1.279214 | 1.617874  | -1.010352 |
| 1  | -1.934925 | 1.798042  | -2.507975 |
| 1  | -2.830234 | 1.215434  | -1.262514 |
| 7  | -2.149354 | -1.991592 | -1.236790 |
| 1  | -2.919042 | -2.416833 | -1.742706 |
| 1  | -1.298264 | -2.432066 | -1.570327 |
| 1  | -2.099690 | -1.011245 | -1.516084 |
| 7  | -0.383551 | 1.820888  | 1.029798  |
| 1  | 0.527693  | 1.508368  | 1.359032  |
| 1  | -1.050416 | 1.097260  | 1.293929  |
| 1  | -0.619358 | 2.650628  | 1.564881  |
| 7  | -2.005019 | -0.982475 | 1.744459  |
| 1  | -1.024707 | -1.156781 | 1.954654  |
| 1  | -2.185327 | -1.490060 | 0.875612  |
| 1  | -2.543686 | -1.425420 | 2.482439  |
| 7  | -4.230563 | 0.932007  | 0.430148  |
| 1  | -5.008026 | 0.282143  | 0.391643  |
| 1  | -3.494878 | 0.491518  | 0.981566  |

|   |           |           |           |
|---|-----------|-----------|-----------|
| 1 | -4.554830 | 1.747622  | 0.937718  |
| 7 | 2.463636  | 0.349766  | 2.018069  |
| 1 | 1.728027  | -0.350874 | 2.087870  |
| 1 | 3.194146  | -0.094314 | 1.461839  |
| 1 | 2.833044  | 0.498200  | 2.951633  |
| 7 | 0.891653  | -2.152584 | 0.843464  |
| 1 | 1.807725  | -2.577457 | 0.946966  |
| 1 | 0.885490  | -1.664387 | -0.055156 |
| 1 | 0.221302  | -2.911411 | 0.774069  |
| 7 | 2.463876  | 2.118421  | -0.654815 |
| 1 | 3.119241  | 2.874827  | -0.821648 |
| 1 | 2.540609  | 1.838983  | 0.322454  |
| 1 | 1.529853  | 2.503400  | -0.760173 |
| 7 | 0.871756  | -0.475823 | -1.893445 |
| 1 | -0.071717 | -0.094251 | -1.947015 |
| 1 | 1.121436  | -0.768589 | -2.833205 |
| 1 | 1.481411  | 0.305749  | -1.659125 |
| 7 | 3.976613  | -0.778735 | -0.569444 |
| 1 | 3.634127  | 0.122120  | -0.895580 |
| 1 | 3.408929  | -1.486398 | -1.022963 |
| 1 | 4.927476  | -0.895253 | -0.901480 |

-----

Cartesian coordinates of : MP2\_AM10\_16

-----

Atomic number (AN) and Cartesian coordinates

| AN | X         | Y         | Z         |
|----|-----------|-----------|-----------|
| 7  | 2.422114  | -0.283401 | -1.720107 |
| 1  | 2.201619  | 0.692742  | -1.499567 |
| 1  | 2.953969  | -0.648484 | -0.935689 |
| 1  | 3.048037  | -0.273836 | -2.519359 |
| 7  | -2.670319 | -0.033020 | -1.525292 |
| 1  | -3.240095 | 0.010549  | -2.364406 |
| 1  | -3.220488 | -0.517294 | -0.822611 |
| 1  | -1.877703 | -0.644341 | -1.734396 |
| 7  | 1.679684  | 2.570518  | -0.692185 |
| 1  | 1.955763  | 2.400781  | 0.271029  |
| 1  | 0.666977  | 2.711176  | -0.701104 |
| 1  | 2.106057  | 3.445190  | -0.979408 |
| 7  | -1.487839 | 2.774246  | -0.563041 |
| 1  | -1.682476 | 2.804272  | 0.432538  |
| 1  | -1.914793 | 1.917462  | -0.920462 |
| 1  | -1.970298 | 3.558996  | -0.987838 |
| 7  | -0.196239 | -1.991476 | -2.044598 |
| 1  | 0.649300  | -1.416815 | -1.973375 |
| 1  | -0.077423 | -2.768491 | -1.402593 |
| 1  | -0.202601 | -2.391367 | -2.977959 |
| 7  | 3.169856  | 0.756983  | 1.749608  |
| 1  | 3.896601  | 1.136193  | 1.151523  |
| 1  | 3.492768  | 0.863996  | 2.705392  |
| 1  | 3.111370  | -0.242653 | 1.554885  |
| 7  | -2.189050 | -2.216129 | 0.947868  |
| 1  | -1.279957 | -1.753712 | 0.963919  |
| 1  | -2.270358 | -2.692775 | 0.056546  |
| 1  | -2.191985 | -2.928275 | 1.670116  |
| 7  | 0.036185  | 0.034317  | 0.975530  |
| 1  | 0.871336  | 0.495799  | 1.332241  |
| 1  | -0.032144 | 0.305446  | -0.002255 |
| 1  | -0.766799 | 0.462035  | 1.436050  |
| 7  | 2.231746  | -2.215646 | 0.959000  |
| 1  | 1.334165  | -1.729301 | 0.942963  |
| 1  | 2.208056  | -2.889212 | 1.717148  |
| 1  | 2.315876  | -2.743047 | 0.096949  |
| 7  | -3.002123 | 0.745592  | 1.898010  |
| 1  | -3.002262 | -0.238399 | 1.631914  |
| 1  | -3.529883 | 1.248550  | 1.193045  |
| 1  | -3.510729 | 0.830928  | 2.771218  |

-----

Cartesian coordinates of : MP2\_AM10\_17

-----  
Atomic number (AN) and Cartesian coordinates

| AN | X         | Y         | Z         |
|----|-----------|-----------|-----------|
| 7  | 2.793341  | 1.988419  | 0.795311  |
| 1  | 2.129534  | 1.570102  | 1.439190  |
| 1  | 3.313521  | 2.689830  | 1.311058  |
| 1  | 2.240349  | 2.469887  | 0.085331  |
| 7  | -2.324355 | -1.074320 | -1.484003 |
| 1  | -2.947318 | -1.200166 | -2.275397 |
| 1  | -1.712084 | -1.892116 | -1.460445 |
| 1  | -2.897734 | -1.084439 | -0.639500 |
| 7  | 3.837370  | -0.815196 | -0.197917 |
| 1  | 3.898218  | -0.837465 | -1.210714 |
| 1  | 4.763517  | -1.047210 | 0.146078  |
| 1  | 3.649266  | 0.153318  | 0.072784  |
| 7  | -0.130603 | -3.413606 | -1.348343 |
| 1  | 0.425033  | -3.295787 | -0.498365 |
| 1  | 0.515359  | -3.365564 | -2.129401 |
| 1  | -0.498216 | -4.359185 | -1.338309 |
| 7  | -2.111973 | 2.080518  | -0.889262 |
| 1  | -2.338249 | 2.053806  | 0.100581  |
| 1  | -2.116405 | 1.105730  | -1.196873 |
| 1  | -2.888624 | 2.540038  | -1.353976 |
| 7  | 0.775640  | 3.205185  | -1.438858 |
| 1  | -0.198514 | 2.918511  | -1.299912 |
| 1  | 0.995962  | 3.047548  | -2.417179 |
| 1  | 0.811274  | 4.209996  | -1.299075 |
| 7  | -1.143214 | 1.089009  | 2.201645  |
| 1  | -0.883559 | 0.678026  | 3.092529  |
| 1  | -0.539418 | 0.684084  | 1.479308  |
| 1  | -0.912118 | 2.075382  | 2.264052  |
| 7  | 1.581733  | -2.647580 | 1.205650  |
| 1  | 0.969766  | -1.949788 | 1.615749  |
| 1  | 1.891063  | -3.258272 | 1.953609  |
| 1  | 2.397559  | -2.149601 | 0.847364  |
| 7  | -3.777017 | -0.543841 | 1.327748  |
| 1  | -3.910822 | -1.284064 | 2.007903  |
| 1  | -4.629318 | 0.005723  | 1.326055  |
| 1  | -3.025294 | 0.055845  | 1.669190  |
| 7  | 0.470952  | 0.049323  | -0.240186 |
| 1  | 0.735109  | 0.936959  | -0.657783 |
| 1  | -0.300702 | -0.319142 | -0.792985 |
| 1  | 1.259732  | -0.577358 | -0.363363 |

-----  
Cartesian coordinates of : MP2\_AM10\_18-----  
Atomic number (AN) and Cartesian coordinates

| AN | X         | Y         | Z         |
|----|-----------|-----------|-----------|
| 7  | 1.697795  | -2.093771 | -0.776752 |
| 1  | 1.155962  | -1.331487 | -1.175750 |
| 1  | 1.856158  | -2.771198 | -1.515178 |
| 1  | 2.609007  | -1.712373 | -0.516670 |
| 7  | 4.419902  | -0.637260 | 0.112849  |
| 1  | 4.255161  | 0.338853  | -0.140926 |
| 1  | 5.205131  | -0.963626 | -0.440557 |
| 1  | 4.731370  | -0.644652 | 1.078492  |
| 7  | 3.391055  | 2.298234  | -0.481176 |
| 1  | 2.594618  | 1.999055  | 0.084704  |
| 1  | 3.041933  | 2.527100  | -1.405278 |
| 1  | 3.758320  | 3.155669  | -0.083659 |
| 7  | -0.424308 | -2.635463 | 1.427617  |
| 1  | -0.494377 | -3.610503 | 1.702613  |
| 1  | -0.143945 | -2.128948 | 2.261535  |
| 1  | 0.352058  | -2.559943 | 0.762130  |
| 7  | -2.412688 | -2.093038 | -1.096185 |
| 1  | -2.631986 | -2.946612 | -1.598590 |
| 1  | -3.285632 | -1.727932 | -0.729704 |

|   |           |           |           |
|---|-----------|-----------|-----------|
| 1 | -1.848926 | -2.346239 | -0.285412 |
| 7 | -2.671344 | -0.087158 | 1.553361  |
| 1 | -2.017311 | -0.862033 | 1.471404  |
| 1 | -3.194863 | -0.229477 | 2.410586  |
| 1 | -2.134450 | 0.773287  | 1.658326  |
| 7 | 1.198737  | 0.701492  | 1.038378  |
| 1 | 0.617963  | 0.435511  | 0.242091  |
| 1 | 1.815680  | -0.081624 | 1.229756  |
| 1 | 0.584389  | 0.814609  | 1.837467  |
| 7 | -3.444263 | 1.506820  | -1.050273 |
| 1 | -3.408872 | 0.843650  | -0.273957 |
| 1 | -3.502503 | 0.970075  | -1.909095 |
| 1 | -4.310586 | 2.029037  | -0.972257 |
| 7 | -1.256869 | 2.743458  | 0.987611  |
| 1 | -1.845752 | 2.630505  | 0.164406  |
| 1 | -0.287463 | 2.706603  | 0.688539  |
| 1 | -1.419245 | 3.672505  | 1.360201  |
| 7 | -0.470663 | 0.300954  | -1.710716 |
| 1 | -1.069940 | 1.112720  | -1.584494 |
| 1 | -1.099942 | -0.505497 | -1.711797 |
| 1 | -0.073428 | 0.383090  | -2.641916 |

-----

Cartesian coordinates of :     MP2\_AM10\_19

-----

Atomic number (AN) and Cartesian coordinates

| AN | X         | Y         | Z         |
|----|-----------|-----------|-----------|
| 7  | -1.723709 | 1.465202  | 2.107349  |
| 1  | -1.160886 | 1.217337  | 2.914648  |
| 1  | -2.063758 | 0.594776  | 1.700534  |
| 1  | -2.529184 | 1.969177  | 2.463163  |
| 7  | -2.152821 | -1.224093 | 0.421893  |
| 1  | -1.822956 | -1.046758 | -0.527008 |
| 1  | -2.710224 | -2.071956 | 0.399367  |
| 1  | -1.314809 | -1.425337 | 0.962981  |
| 7  | 0.912819  | -0.750742 | 1.269690  |
| 1  | 0.575646  | 0.170120  | 0.999414  |
| 1  | 1.644330  | -0.586681 | 1.954572  |
| 1  | 1.368714  | -1.120555 | 0.436654  |
| 7  | 0.369822  | 2.461693  | -0.126403 |
| 1  | 1.239148  | 2.555147  | 0.401369  |
| 1  | -0.378447 | 2.331070  | 0.556435  |
| 1  | 0.203428  | 3.356525  | -0.577008 |
| 7  | 0.998077  | -2.269157 | -1.549383 |
| 1  | 0.178136  | -1.704101 | -1.766109 |
| 1  | 1.273893  | -2.744146 | -2.402568 |
| 1  | 0.716050  | -2.990283 | -0.886249 |
| 7  | 0.317314  | -3.932238 | 1.141650  |
| 1  | -0.556799 | -4.342336 | 1.449954  |
| 1  | 0.354955  | -2.975465 | 1.485717  |
| 1  | 1.062844  | -4.452555 | 1.590345  |
| 7  | -1.008135 | 0.270454  | -2.125707 |
| 1  | -1.955983 | 0.646116  | -2.129958 |
| 1  | -0.665320 | 0.312820  | -3.080336 |
| 1  | -0.452960 | 0.930306  | -1.579236 |
| 7  | -3.707591 | 1.349679  | -0.827427 |
| 1  | -3.441346 | 2.222005  | -0.384897 |
| 1  | -4.717728 | 1.345168  | -0.908952 |
| 1  | -3.435023 | 0.593898  | -0.203725 |
| 7  | 3.325482  | 2.100841  | 1.110809  |
| 1  | 4.037929  | 2.804684  | 0.949944  |
| 1  | 3.360231  | 1.443317  | 0.329557  |
| 1  | 3.597676  | 1.604348  | 1.951877  |
| 7  | 2.697026  | 0.520723  | -1.520382 |
| 1  | 3.160286  | 0.731649  | -2.397542 |
| 1  | 1.880557  | 1.122257  | -1.443236 |
| 1  | 2.353608  | -0.437074 | -1.574333 |

-----

Cartesian coordinates of :     MP2\_AM10\_20

-----  
Atomic number (AN) and Cartesian coordinates

| AN | X         | Y         | Z         |
|----|-----------|-----------|-----------|
| 7  | -1.643733 | -0.901419 | 0.466748  |
| 1  | -0.832764 | -1.370308 | 0.053323  |
| 1  | -1.647921 | -1.170490 | 1.446846  |
| 1  | -2.479510 | -1.315593 | 0.050710  |
| 7  | -0.630565 | 1.643083  | -1.333458 |
| 1  | -1.415646 | 1.910760  | -1.917939 |
| 1  | -0.455826 | 2.413078  | -0.696334 |
| 1  | -0.932532 | 0.856022  | -0.760014 |
| 7  | 0.858114  | -2.333986 | -0.920381 |
| 1  | 1.650458  | -2.628124 | -0.358722 |
| 1  | 1.208587  | -1.609342 | -1.550355 |
| 1  | 0.592568  | -3.129639 | -1.492011 |
| 7  | 1.846895  | 0.146052  | -2.640762 |
| 1  | 2.691187  | 0.604080  | -2.314506 |
| 1  | 1.060604  | 0.709050  | -2.311232 |
| 1  | 1.856874  | 0.190307  | -3.654274 |
| 7  | -4.609442 | -1.360457 | -0.707149 |
| 1  | -4.680965 | -0.387251 | -0.414005 |
| 1  | -4.764677 | -1.396765 | -1.708210 |
| 1  | -5.368158 | -1.874064 | -0.273560 |
| 7  | 3.723077  | -0.791272 | 0.179560  |
| 1  | 3.407198  | 0.175685  | 0.078516  |
| 1  | 4.694149  | -0.762536 | 0.472857  |
| 1  | 3.711930  | -1.201411 | -0.748439 |
| 7  | 2.573163  | 2.185878  | 0.013351  |
| 1  | 3.134043  | 2.921225  | 0.431477  |
| 1  | 1.793584  | 1.999151  | 0.649623  |
| 1  | 2.174517  | 2.573190  | -0.835466 |
| 7  | 1.513533  | -1.487155 | 2.372443  |
| 1  | 1.897557  | -1.943035 | 3.193188  |
| 1  | 2.275531  | -1.354191 | 1.704948  |
| 1  | 0.861348  | -2.138209 | 1.948450  |
| 7  | 0.254022  | 1.377309  | 2.002733  |
| 1  | -0.634254 | 1.104292  | 1.592527  |
| 1  | 0.043454  | 1.916610  | 2.836490  |
| 1  | 0.690108  | 0.501790  | 2.302350  |
| 7  | -3.851461 | 1.451182  | 0.568996  |
| 1  | -2.979035 | 0.925645  | 0.574900  |
| 1  | -4.121836 | 1.619178  | 1.531748  |
| 1  | -3.665802 | 2.356391  | 0.152551  |

-----  
Cartesian coordinates of : MP2\_AM10\_21-----  
Atomic number (AN) and Cartesian coordinates

| AN | X         | Y         | Z         |
|----|-----------|-----------|-----------|
| 7  | -2.268223 | -1.247311 | -1.034045 |
| 1  | -2.843988 | -1.935853 | -1.509282 |
| 1  | -1.346491 | -1.288910 | -1.474900 |
| 1  | -2.667874 | -0.332049 | -1.245811 |
| 7  | 0.703858  | -1.454971 | -2.303926 |
| 1  | 0.812725  | -1.901484 | -3.208975 |
| 1  | 1.204948  | -2.026446 | -1.622886 |
| 1  | 1.211660  | -0.577206 | -2.345922 |
| 7  | 2.114141  | 0.447990  | 0.083958  |
| 1  | 1.474577  | 0.572451  | 0.864895  |
| 1  | 2.231067  | -0.554098 | -0.033930 |
| 1  | 3.018846  | 0.830896  | 0.352809  |
| 7  | -0.642018 | 1.481424  | 1.641400  |
| 1  | -0.455883 | 2.268253  | 2.254704  |
| 1  | -1.618690 | 1.222283  | 1.772509  |
| 1  | -0.550528 | 1.816950  | 0.684732  |
| 7  | 5.026710  | 1.818069  | 0.694147  |
| 1  | 5.063670  | 2.580110  | 0.027055  |
| 1  | 5.177845  | 2.214976  | 1.614360  |

|   |           |           |           |
|---|-----------|-----------|-----------|
| 1 | 5.812875  | 1.209005  | 0.498753  |
| 7 | -0.039639 | 1.941365  | -1.628892 |
| 1 | -0.417637 | 1.274819  | -2.295117 |
| 1 | 0.307563  | 2.731736  | -2.162727 |
| 1 | 0.766942  | 1.491457  | -1.186582 |
| 7 | -3.191370 | 1.815308  | -0.938027 |
| 1 | -3.804004 | 2.509949  | -1.350188 |
| 1 | -3.380963 | 1.788156  | 0.058853  |
| 1 | -2.230761 | 2.131222  | -1.056455 |
| 7 | 2.062182  | -3.024386 | 0.156687  |
| 1 | 1.906195  | -4.011796 | -0.017130 |
| 1 | 1.298454  | -2.687088 | 0.751615  |
| 1 | 2.923061  | -2.959707 | 0.689585  |
| 7 | -0.372084 | -1.771388 | 1.581296  |
| 1 | -1.066485 | -1.789500 | 0.835093  |
| 1 | -0.264072 | -0.788204 | 1.826323  |
| 1 | -0.777016 | -2.237716 | 2.386552  |
| 7 | -3.506353 | -0.057270 | 1.720147  |
| 1 | -4.502936 | -0.000194 | 1.537952  |
| 1 | -3.397788 | -0.585929 | 2.578916  |
| 1 | -3.095759 | -0.607894 | 0.965978  |

-----

Cartesian coordinates of :      MP2\_AM10\_22

-----

Atomic number (AN) and Cartesian coordinates

| AN | X         | Y         | Z         |
|----|-----------|-----------|-----------|
| 7  | -0.634542 | 0.825836  | 2.379259  |
| 1  | -1.049546 | -0.096153 | 2.265468  |
| 1  | -0.827058 | 1.121869  | 3.330621  |
| 1  | -1.149220 | 1.448542  | 1.760720  |
| 7  | -1.483151 | 2.731517  | -0.303877 |
| 1  | -1.700550 | 3.698787  | -0.084025 |
| 1  | -1.752818 | 2.596451  | -1.273912 |
| 1  | -0.463408 | 2.637750  | -0.260280 |
| 7  | -2.057554 | -2.081273 | 1.357232  |
| 1  | -1.918825 | -2.654192 | 0.529798  |
| 1  | -2.676915 | -1.315495 | 1.071080  |
| 1  | -2.576166 | -2.653166 | 2.016857  |
| 7  | -3.702202 | 0.335783  | 0.255062  |
| 1  | -3.795460 | 0.033630  | -0.715563 |
| 1  | -3.166372 | 1.201435  | 0.251359  |
| 1  | -4.630885 | 0.558638  | 0.597024  |
| 7  | 1.512253  | 2.040177  | 0.276231  |
| 1  | 1.134678  | 1.580238  | 1.102874  |
| 1  | 2.010310  | 1.333426  | -0.266984 |
| 1  | 2.195398  | 2.722998  | 0.586021  |
| 7  | -3.206429 | -0.928357 | -2.631075 |
| 1  | -3.227037 | -0.524132 | -3.560855 |
| 1  | -2.237849 | -0.909476 | -2.303980 |
| 1  | -3.482827 | -1.898974 | -2.730459 |
| 7  | -0.538940 | -0.403874 | -1.103911 |
| 1  | 0.152270  | 0.234709  | -1.487889 |
| 1  | -0.000024 | -1.049079 | -0.531161 |
| 1  | -1.077987 | 0.148500  | -0.442631 |
| 7  | 2.815638  | -0.524943 | -1.151178 |
| 1  | 2.622306  | -0.919641 | -2.065551 |
| 1  | 2.357710  | -1.120324 | -0.462891 |
| 1  | 3.821533  | -0.587732 | -1.005506 |
| 7  | 1.182228  | -1.794939 | 1.409872  |
| 1  | 1.366030  | -0.926175 | 1.903060  |
| 1  | 1.729304  | -2.523388 | 1.856770  |
| 1  | 0.198539  | -2.002873 | 1.579002  |
| 7  | 5.995149  | -0.198054 | -0.536523 |
| 1  | 6.649330  | -0.908733 | -0.230040 |
| 1  | 5.891014  | 0.464901  | 0.222995  |
| 1  | 6.427367  | 0.294544  | -1.309563 |

-----

Cartesian coordinates of :      MP2\_AM10\_23

-----  
Atomic number (AN) and Cartesian coordinates

| AN | X         | Y         | Z         |
|----|-----------|-----------|-----------|
| 7  | -0.584583 | 1.199815  | 1.718729  |
| 1  | -0.046351 | 0.352415  | 1.894976  |
| 1  | 0.088836  | 1.904805  | 1.430398  |
| 1  | -0.972540 | 1.501753  | 2.606468  |
| 7  | -0.858170 | -2.406409 | 0.327385  |
| 1  | -0.400083 | -2.016588 | 1.147351  |
| 1  | -1.336185 | -3.253194 | 0.618008  |
| 1  | -1.577071 | -1.736673 | 0.040554  |
| 7  | 1.762335  | -1.074858 | 1.976164  |
| 1  | 2.295499  | -0.248876 | 1.720441  |
| 1  | 2.012204  | -1.786378 | 1.287335  |
| 1  | 2.117996  | -1.386755 | 2.874485  |
| 7  | 2.116503  | -3.018282 | -0.530556 |
| 1  | 2.379983  | -2.532721 | -1.381374 |
| 1  | 1.098674  | -2.963477 | -0.467698 |
| 1  | 2.372750  | -3.992784 | -0.646722 |
| 7  | -2.611580 | 0.040407  | -0.476429 |
| 1  | -2.059945 | 0.561300  | 0.205643  |
| 1  | -2.384795 | 0.401851  | -1.396134 |
| 1  | -3.598948 | 0.217213  | -0.307332 |
| 7  | 3.425208  | 0.260887  | -0.647925 |
| 1  | 2.574049  | 0.004050  | -1.157617 |
| 1  | 4.098850  | 0.593108  | -1.330956 |
| 1  | 3.805267  | -0.599759 | -0.266449 |
| 7  | 0.665469  | -0.358660 | -1.984793 |
| 1  | 0.490163  | -0.654243 | -2.940043 |
| 1  | 0.291729  | 0.587278  | -1.891482 |
| 1  | 0.105935  | -0.964184 | -1.388700 |
| 7  | 2.208226  | 2.798161  | 0.770158  |
| 1  | 2.707355  | 3.616230  | 0.435011  |
| 1  | 2.681326  | 1.976120  | 0.384321  |
| 1  | 2.346732  | 2.780881  | 1.775702  |
| 7  | -0.274449 | 2.633611  | -1.353753 |
| 1  | -1.158991 | 2.623981  | -0.857221 |
| 1  | -0.282592 | 3.445524  | -1.961860 |
| 1  | 0.452912  | 2.778796  | -0.655138 |
| 7  | -5.811022 | -0.119304 | 0.137911  |
| 1  | -6.385566 | 0.418448  | 0.776096  |
| 1  | -5.612961 | -1.009336 | 0.580099  |
| 1  | -6.369795 | -0.306367 | -0.686390 |

-----  
Cartesian coordinates of : MP2\_AM10\_24-----  
Atomic number (AN) and Cartesian coordinates

| AN | X         | Y         | Z         |
|----|-----------|-----------|-----------|
| 7  | -1.407535 | -1.679490 | 1.703593  |
| 1  | -1.624273 | -0.692990 | 1.831692  |
| 1  | -0.406633 | -1.781541 | 1.856636  |
| 1  | -1.882368 | -2.197688 | 2.434833  |
| 7  | 1.654979  | -0.733004 | 1.922023  |
| 1  | 2.668629  | -0.745672 | 1.863162  |
| 1  | 1.421037  | -0.330795 | 2.823862  |
| 1  | 1.334701  | -0.089569 | 1.196613  |
| 7  | 0.740816  | 0.903743  | -0.689118 |
| 1  | 0.066762  | 0.189149  | -0.968239 |
| 1  | 0.349477  | 1.788898  | -0.998821 |
| 1  | 1.587221  | 0.738155  | -1.239487 |
| 7  | -1.465426 | -1.481114 | -1.409260 |
| 1  | -2.348154 | -1.024966 | -1.619512 |
| 1  | -1.519018 | -1.761817 | -0.427362 |
| 1  | -1.439206 | -2.325494 | -1.972439 |
| 7  | 3.577203  | -0.004159 | -1.603363 |
| 1  | 3.220842  | -0.936330 | -1.391989 |
| 1  | 4.270138  | -0.090155 | -2.337901 |



|   |           |           |           |
|---|-----------|-----------|-----------|
| 1 | 4.043016  | 0.353390  | -0.774013 |
| 7 | 1.758568  | -2.474429 | -0.757755 |
| 1 | 1.829715  | -3.467784 | -0.948391 |
| 1 | 0.913853  | -2.136384 | -1.209515 |
| 1 | 1.614289  | -2.361234 | 0.242201  |
| 7 | -1.638736 | 1.603375  | 1.371022  |
| 1 | -1.754857 | 2.316883  | 2.083954  |
| 1 | -0.640771 | 1.429637  | 1.280750  |
| 1 | -1.910881 | 2.013854  | 0.476476  |
| 7 | -4.120041 | -0.123887 | 0.141760  |
| 1 | -5.045589 | 0.163560  | 0.441428  |
| 1 | -3.443188 | 0.283585  | 0.784353  |
| 1 | -4.069815 | -1.130044 | 0.260845  |
| 7 | -2.506248 | 1.940406  | -1.685264 |
| 1 | -2.992166 | 2.629975  | -2.248199 |
| 1 | -3.187702 | 1.247471  | -1.378586 |
| 1 | -1.849432 | 1.467282  | -2.297011 |
| 7 | 3.531723  | 1.992277  | 0.912454  |
| 1 | 3.483026  | 2.251807  | 1.890988  |
| 1 | 2.587016  | 1.784437  | 0.600966  |
| 1 | 3.847200  | 2.808352  | 0.400054  |

-----

Cartesian coordinates of : MP2\_AM10\_25

-----

Atomic number (AN) and Cartesian coordinates

| AN | X         | Y         | Z         |
|----|-----------|-----------|-----------|
| 7  | 0.923361  | 2.817082  | 0.586865  |
| 1  | 1.597327  | 3.147238  | -0.095332 |
| 1  | 1.340780  | 2.027802  | 1.084201  |
| 1  | 0.786832  | 3.570182  | 1.252815  |
| 7  | 1.766825  | 0.131261  | 2.011076  |
| 1  | 1.141235  | 0.011501  | 2.801599  |
| 1  | 2.689889  | -0.148321 | 2.327020  |
| 1  | 1.482213  | -0.549566 | 1.307219  |
| 7  | 0.569806  | -1.837480 | -0.311372 |
| 1  | 0.578711  | -1.067232 | -0.982794 |
| 1  | 0.599570  | -2.695025 | -0.855637 |
| 1  | -0.348234 | -1.832303 | 0.134855  |
| 7  | 0.884083  | 0.832969  | -2.003813 |
| 1  | 1.859699  | 0.855601  | -1.697810 |
| 1  | 0.412576  | 1.567884  | -1.482923 |
| 1  | 0.872819  | 1.108179  | -2.981047 |
| 7  | -2.549044 | -1.997211 | 0.497143  |
| 1  | -2.638036 | -3.007653 | 0.528111  |
| 1  | -3.361167 | -1.612622 | 0.975769  |
| 1  | -2.638865 | -1.703128 | -0.475909 |
| 7  | -2.364665 | -0.100654 | -2.028506 |
| 1  | -2.486571 | 0.637210  | -1.338773 |
| 1  | -2.851659 | 0.176980  | -2.873491 |
| 1  | -1.371059 | -0.123570 | -2.242634 |
| 7  | -1.883501 | 1.198691  | 0.886768  |
| 1  | -1.021621 | 1.686007  | 0.644387  |
| 1  | -1.673481 | 0.207962  | 0.986641  |
| 1  | -2.153377 | 1.533169  | 1.806552  |
| 7  | -4.895262 | 0.173202  | 0.660879  |
| 1  | -4.062356 | 0.738594  | 0.511814  |
| 1  | -5.610232 | 0.768884  | 1.061985  |
| 1  | -5.227840 | -0.131865 | -0.246679 |
| 7  | 3.769787  | 0.899915  | -0.610853 |
| 1  | 3.635674  | 1.458962  | 0.225312  |
| 1  | 4.655478  | 1.186353  | -1.015093 |
| 1  | 3.879444  | -0.065277 | -0.295779 |
| 7  | 3.677600  | -2.152756 | 0.304134  |
| 1  | 2.660967  | -2.154594 | 0.211760  |
| 1  | 3.904215  | -2.585820 | 1.192885  |
| 1  | 4.054147  | -2.760667 | -0.415273 |

-----

Cartesian coordinates of : MP2\_AM10\_26

-----  
Atomic number (AN) and Cartesian coordinates

| AN | X         | Y         | Z         |
|----|-----------|-----------|-----------|
| 7  | -0.066217 | 0.133097  | 2.317751  |
| 1  | 0.807731  | 0.611123  | 2.115008  |
| 1  | -0.104779 | -0.000910 | 3.323084  |
| 1  | 0.014915  | -0.788651 | 1.894642  |
| 7  | -0.241440 | -2.640979 | 0.432076  |
| 1  | -0.578740 | -3.367556 | 1.056142  |
| 1  | 0.086211  | -3.115991 | -0.403652 |
| 1  | -1.051174 | -2.068507 | 0.166066  |
| 7  | 2.822002  | 1.602772  | 1.086737  |
| 1  | 3.336790  | 1.949036  | 0.282526  |
| 1  | 2.953777  | 0.585151  | 1.103103  |
| 1  | 3.293599  | 1.978220  | 1.903997  |
| 7  | 2.939326  | -1.513736 | 0.912561  |
| 1  | 3.271722  | -1.602815 | -0.048671 |
| 1  | 2.007284  | -1.922168 | 0.942417  |
| 1  | 3.535892  | -2.093808 | 1.493098  |
| 7  | -2.343946 | -0.427344 | -0.010476 |
| 1  | -1.982521 | 0.030369  | 0.822605  |
| 1  | -2.151898 | 0.199186  | -0.788592 |
| 1  | -3.354887 | -0.507019 | 0.076243  |
| 7  | 3.464692  | -1.262449 | -2.233608 |
| 1  | 3.312999  | -1.972402 | -2.941459 |
| 1  | 2.595400  | -0.732973 | -2.127365 |
| 1  | 4.171169  | -0.633765 | -2.599344 |
| 7  | 0.890349  | 0.138204  | -1.218494 |
| 1  | 0.049259  | 0.520781  | -1.644233 |
| 1  | 1.222726  | 0.852178  | -0.576674 |
| 1  | 0.581052  | -0.625739 | -0.624818 |
| 7  | -1.553497 | 2.153656  | -2.029043 |
| 1  | -1.092737 | 2.554084  | -2.839261 |
| 1  | -1.140701 | 2.572058  | -1.191815 |
| 1  | -2.524656 | 2.442927  | -2.073761 |
| 7  | -0.260409 | 2.966821  | 0.733814  |
| 1  | -0.711673 | 2.273490  | 1.325323  |
| 1  | -0.430775 | 3.878307  | 1.145593  |
| 1  | 0.736571  | 2.777373  | 0.820875  |
| 7  | -5.543687 | -1.132517 | -0.036952 |
| 1  | -5.995667 | -0.794129 | -0.878462 |
| 1  | -6.190546 | -0.988234 | 0.729610  |
| 1  | -5.416537 | -2.132290 | -0.142784 |

-----  
Cartesian coordinates of : MP2\_AM10\_27-----  
Atomic number (AN) and Cartesian coordinates

| AN | X         | Y         | Z         |
|----|-----------|-----------|-----------|
| 7  | 3.776951  | 0.063498  | 1.131550  |
| 1  | 3.326299  | 0.972475  | 1.208174  |
| 1  | 3.218219  | -0.574683 | 1.688533  |
| 1  | 4.692502  | 0.127329  | 1.562099  |
| 7  | 2.563269  | -0.876762 | -1.653048 |
| 1  | 3.156695  | -1.338209 | -2.334610 |
| 1  | 1.939079  | -1.583185 | -1.268459 |
| 1  | 3.160642  | -0.578817 | -0.880463 |
| 7  | 1.939017  | 2.768538  | 0.843052  |
| 1  | 1.284552  | 3.373217  | 1.329147  |
| 1  | 1.512994  | 2.505657  | -0.050948 |
| 1  | 2.745744  | 3.345671  | 0.626587  |
| 7  | 0.860473  | 1.743083  | -1.919831 |
| 1  | -0.086670 | 1.438414  | -2.121197 |
| 1  | 1.443709  | 0.901000  | -1.940767 |
| 1  | 1.146521  | 2.330848  | -2.696519 |
| 7  | -2.448263 | -2.290664 | 1.225962  |
| 1  | -3.301770 | -2.535073 | 0.736113  |
| 1  | -2.636456 | -2.397194 | 2.216575  |

|   |           |           |           |
|---|-----------|-----------|-----------|
| 1 | -2.266205 | -1.302961 | 1.045815  |
| 7 | -1.878302 | 0.649610  | 0.088094  |
| 1 | -1.656059 | 0.130281  | -0.762863 |
| 1 | -2.830291 | 1.004566  | 0.007263  |
| 1 | -1.264482 | 1.458504  | 0.094676  |
| 7 | -0.834140 | -1.262961 | -2.233211 |
| 1 | -1.463281 | -1.922298 | -2.679585 |
| 1 | -0.331468 | -1.768930 | -1.502268 |
| 1 | -0.142411 | -1.001307 | -2.928139 |
| 7 | 0.617583  | 0.005603  | 2.131114  |
| 1 | 0.471523  | 0.042586  | 3.134516  |
| 1 | -0.297389 | 0.071308  | 1.688505  |
| 1 | 1.130261  | 0.845354  | 1.870562  |
| 7 | 0.577124  | -2.625038 | 0.299309  |
| 1 | 1.154155  | -3.440108 | 0.480493  |
| 1 | -0.375859 | -2.857529 | 0.579851  |
| 1 | 0.872626  | -1.888376 | 0.940663  |
| 7 | -4.974212 | 1.711118  | 0.048586  |
| 1 | -5.473384 | 1.145650  | 0.725620  |
| 1 | -5.456353 | 1.615673  | -0.837851 |
| 1 | -5.069937 | 2.677952  | 0.337451  |

-----

Cartesian coordinates of : MP2\_AM10\_28

-----

Atomic number (AN) and Cartesian coordinates

| AN | X         | Y         | Z         |
|----|-----------|-----------|-----------|
| 7  | -1.139360 | 3.458925  | 0.859745  |
| 1  | -1.567942 | 3.402352  | -0.061346 |
| 1  | -1.317854 | 4.382014  | 1.237848  |
| 1  | -0.137275 | 3.368949  | 0.724407  |
| 7  | -1.581125 | -1.996522 | -1.366107 |
| 1  | -0.705460 | -2.500955 | -1.449409 |
| 1  | -1.917176 | -1.803324 | -2.302924 |
| 1  | -1.377033 | -1.109159 | -0.909277 |
| 7  | 2.263679  | -1.316597 | -1.806473 |
| 1  | 1.770391  | -1.771894 | -1.034457 |
| 1  | 1.580059  | -1.126426 | -2.531980 |
| 1  | 2.910552  | -1.994353 | -2.197177 |
| 7  | 1.707229  | 0.352381  | 2.000579  |
| 1  | 1.639381  | 0.674462  | 2.960825  |
| 1  | 2.691148  | 0.168340  | 1.803634  |
| 1  | 1.468619  | 1.138711  | 1.399133  |
| 7  | -2.415327 | 1.977660  | -1.703483 |
| 1  | -2.155126 | 1.262534  | -1.026614 |
| 1  | -2.091828 | 1.678581  | -2.616394 |
| 1  | -3.427965 | 2.011543  | -1.743145 |
| 7  | -3.514517 | -2.139652 | 1.147369  |
| 1  | -3.441908 | -2.944001 | 1.760257  |
| 1  | -4.500738 | -2.011372 | 0.950182  |
| 1  | -3.047595 | -2.367170 | 0.269932  |
| 7  | -1.434574 | 0.305285  | 0.901317  |
| 1  | -2.195186 | -0.289365 | 1.232376  |
| 1  | -1.601662 | 1.258602  | 1.226114  |
| 1  | -0.592542 | 0.001087  | 1.386011  |
| 7  | 0.850802  | -2.439924 | 0.782538  |
| 1  | -0.139084 | -2.620478 | 0.920076  |
| 1  | 1.345333  | -3.193580 | 1.249700  |
| 1  | 1.073343  | -1.577945 | 1.286825  |
| 7  | 0.986330  | 1.629360  | -0.840088 |
| 1  | 1.637846  | 0.959121  | -1.238781 |
| 1  | 0.734429  | 2.292755  | -1.564861 |
| 1  | 0.143995  | 1.115791  | -0.592083 |
| 7  | 4.277308  | 0.252823  | 0.205057  |
| 1  | 4.317447  | 1.255282  | 0.056633  |
| 1  | 3.685562  | -0.139822 | -0.525601 |
| 1  | 5.215156  | -0.106454 | 0.066916  |

-----

Cartesian coordinates of : MP2\_AM10\_29

-----  
Atomic number (AN) and Cartesian coordinates

| AN | X         | Y         | Z         |
|----|-----------|-----------|-----------|
| 7  | 0.624849  | 2.951559  | 0.104750  |
| 1  | 1.501225  | 2.479635  | -0.106553 |
| 1  | 0.853074  | 3.911666  | 0.339912  |
| 1  | 0.243143  | 2.516575  | 0.943397  |
| 7  | 0.209148  | -2.679611 | -0.432272 |
| 1  | -0.449994 | -3.296306 | -0.895110 |
| 1  | 0.506707  | -1.971203 | -1.106659 |
| 1  | 1.034287  | -3.229243 | -0.206622 |
| 7  | -1.356419 | 2.032436  | -2.114266 |
| 1  | -2.322945 | 2.212737  | -1.863490 |
| 1  | -1.195847 | 2.498985  | -3.000798 |
| 1  | -0.762888 | 2.482931  | -1.411762 |
| 7  | 1.136499  | -0.097794 | -2.038270 |
| 1  | 1.765464  | 0.457797  | -1.462445 |
| 1  | 0.265824  | 0.427797  | -2.106247 |
| 1  | 1.535361  | -0.114427 | -2.971733 |
| 7  | -2.043933 | -0.357426 | 0.057666  |
| 1  | -2.994238 | -0.708489 | -0.045487 |
| 1  | -1.426245 | -1.164305 | 0.113640  |
| 1  | -1.800664 | 0.129081  | -0.801700 |
| 7  | -1.241491 | 1.553056  | 2.330054  |
| 1  | -1.633014 | 0.923907  | 1.618157  |
| 1  | -1.785221 | 2.410122  | 2.316396  |
| 1  | -1.401719 | 1.127975  | 3.237590  |
| 7  | -5.132966 | -1.493454 | 0.067570  |
| 1  | -5.571039 | -1.017643 | 0.847704  |
| 1  | -5.747785 | -1.392181 | -0.731636 |
| 1  | -5.098314 | -2.480201 | 0.296073  |
| 7  | 1.242007  | -0.589692 | 1.786428  |
| 1  | 0.695145  | -1.242838 | 1.224434  |
| 1  | 1.367899  | -1.026205 | 2.695013  |
| 1  | 0.647327  | 0.223020  | 1.940452  |
| 7  | 3.309321  | -2.526488 | 0.037799  |
| 1  | 3.369979  | -2.206313 | -0.921756 |
| 1  | 4.250557  | -2.680417 | 0.378937  |
| 1  | 2.891333  | -1.779034 | 0.584139  |
| 7  | 3.337891  | 1.139744  | 0.170489  |
| 1  | 4.093153  | 0.590735  | -0.225841 |
| 1  | 2.803770  | 0.529935  | 0.793102  |
| 1  | 3.771325  | 1.859599  | 0.739268  |

-----  
Cartesian coordinates of : MP2\_AM10\_30-----  
Atomic number (AN) and Cartesian coordinates

| AN | X         | Y         | Z         |
|----|-----------|-----------|-----------|
| 7  | 0.429529  | 1.402653  | 1.749421  |
| 1  | 1.374291  | 1.032350  | 1.863761  |
| 1  | 0.473335  | 2.116922  | 1.026146  |
| 1  | 0.185703  | 1.875112  | 2.614337  |
| 7  | -1.766014 | -2.876009 | -0.499689 |
| 1  | -2.580449 | -3.447757 | -0.692551 |
| 1  | -1.162421 | -2.913984 | -1.315367 |
| 1  | -2.072402 | -1.907291 | -0.386255 |
| 7  | 3.093441  | -0.270245 | 1.398139  |
| 1  | 3.349537  | 0.111396  | 0.492613  |
| 1  | 2.441417  | -1.038401 | 1.250028  |
| 1  | 3.930638  | -0.650153 | 1.825443  |
| 7  | 0.378612  | -1.976907 | 1.562550  |
| 1  | 0.526621  | -2.444104 | 2.452057  |
| 1  | -0.411647 | -2.438077 | 1.107521  |
| 1  | 0.082674  | -1.026636 | 1.777058  |
| 7  | -2.148582 | 0.216849  | -0.065699 |
| 1  | -1.514969 | 0.561980  | 0.651845  |
| 1  | -1.745057 | 0.485156  | -0.957015 |

|   |           |           |           |
|---|-----------|-----------|-----------|
| 1 | -3.042254 | 0.692284  | 0.038443  |
| 7 | 3.101099  | 2.319429  | -0.596246 |
| 1 | 3.429609  | 2.446520  | 0.355518  |
| 1 | 3.709919  | 2.868281  | -1.194066 |
| 1 | 2.171786  | 2.735399  | -0.646145 |
| 7 | 1.404250  | -3.164681 | -1.334193 |
| 1 | 1.274364  | -2.804355 | -0.390210 |
| 1 | 2.395180  | -3.121914 | -1.545695 |
| 1 | 1.147649  | -4.145694 | -1.313912 |
| 7 | 0.828364  | 0.070324  | -1.432457 |
| 1 | 1.769991  | 0.455903  | -1.438091 |
| 1 | 0.627866  | -0.163253 | -0.463558 |
| 1 | 0.856491  | -0.821157 | -1.920982 |
| 7 | -0.018691 | 3.027456  | -1.159757 |
| 1 | 0.030285  | 2.067791  | -1.507619 |
| 1 | 0.041142  | 3.651966  | -1.957387 |
| 1 | -0.941885 | 3.158076  | -0.759223 |
| 7 | -5.237153 | 1.155814  | 0.348351  |
| 1 | -5.795674 | 1.417421  | -0.455799 |
| 1 | -5.550603 | 1.722707  | 1.127683  |
| 1 | -5.455125 | 0.190733  | 0.568501  |

-----

Cartesian coordinates of :      MP2\_AM10\_31

-----

Atomic number (AN) and Cartesian coordinates

| AN | X         | Y         | Z         |
|----|-----------|-----------|-----------|
| 7  | 2.831004  | 2.987909  | 0.072216  |
| 1  | 3.204070  | 2.147064  | 0.506997  |
| 1  | 3.252314  | 3.077013  | -0.845491 |
| 1  | 3.141763  | 3.781951  | 0.620429  |
| 7  | -0.594300 | -1.739861 | 0.999619  |
| 1  | -1.579115 | -1.782054 | 1.253951  |
| 1  | -0.069717 | -2.140351 | 1.770202  |
| 1  | -0.345353 | -0.754324 | 0.940910  |
| 7  | -3.905079 | -1.677772 | 0.927771  |
| 1  | -3.617301 | -1.564186 | -0.047035 |
| 1  | -4.138855 | -2.655143 | 1.067004  |
| 1  | -4.763622 | -1.153228 | 1.058733  |
| 7  | -2.928708 | 2.015620  | -1.452842 |
| 1  | -2.728302 | 2.994882  | -1.626844 |
| 1  | -3.815317 | 1.817178  | -1.904383 |
| 1  | -3.058108 | 1.900186  | -0.445080 |
| 7  | 4.838628  | -1.531867 | -0.383251 |
| 1  | 5.355617  | -1.233895 | -1.202903 |
| 1  | 4.579149  | -0.696471 | 0.134116  |
| 1  | 5.482409  | -2.060921 | 0.194173  |
| 7  | 1.728739  | -1.499873 | -1.204142 |
| 1  | 1.546628  | -1.573468 | -2.199381 |
| 1  | 2.649074  | -1.902260 | -1.034078 |
| 1  | 1.023852  | -2.052352 | -0.720842 |
| 7  | 0.107928  | 1.215053  | -0.246468 |
| 1  | 0.635289  | 0.493777  | -0.736912 |
| 1  | 0.738801  | 2.012031  | -0.164260 |
| 1  | -0.657521 | 1.488615  | -0.858738 |
| 7  | -2.313883 | -1.143318 | -1.698543 |
| 1  | -1.496716 | -1.469469 | -1.189534 |
| 1  | -2.272414 | -1.533171 | -2.633545 |
| 1  | -2.251826 | -0.130219 | -1.781836 |
| 7  | -2.592114 | 1.265214  | 1.552551  |
| 1  | -2.884860 | 0.298346  | 1.670936  |
| 1  | -2.700577 | 1.730331  | 2.446816  |
| 1  | -1.600907 | 1.255555  | 1.319505  |
| 7  | 2.709446  | 0.109138  | 1.420766  |
| 1  | 2.302824  | -0.301972 | 0.582227  |
| 1  | 1.971378  | 0.655520  | 1.853615  |
| 1  | 2.925717  | -0.650671 | 2.057499  |

-----

Cartesian coordinates of :      MP2\_AM10\_32

-----  
Atomic number (AN) and Cartesian coordinates

| AN | X         | Y         | Z         |
|----|-----------|-----------|-----------|
| 7  | -0.825519 | 2.088721  | -1.558963 |
| 1  | -1.759184 | 2.265141  | -1.188684 |
| 1  | -0.678678 | 2.736463  | -2.326237 |
| 1  | -0.167504 | 2.342379  | -0.828175 |
| 7  | 3.763594  | -1.104743 | 1.360344  |
| 1  | 4.182891  | -1.117007 | 0.431645  |
| 1  | 4.483249  | -1.359489 | 2.027495  |
| 1  | 3.495253  | -0.138018 | 1.536813  |
| 7  | 4.366173  | -0.506635 | -1.727869 |
| 1  | 4.823253  | 0.385036  | -1.881879 |
| 1  | 3.357097  | -0.354069 | -1.752102 |
| 1  | 4.606661  | -1.100503 | -2.513487 |
| 7  | 1.174797  | -0.474235 | -1.613748 |
| 1  | 1.076131  | -1.154999 | -2.360422 |
| 1  | 0.446567  | 0.224576  | -1.756525 |
| 1  | 0.957236  | -0.957475 | -0.743123 |
| 7  | 0.694651  | -1.512584 | 1.479388  |
| 1  | 0.355375  | -2.276799 | 2.056030  |
| 1  | 0.526912  | -0.656123 | 2.000414  |
| 1  | 1.714821  | -1.606420 | 1.437464  |
| 7  | -0.952256 | 1.659832  | 1.842576  |
| 1  | -1.432977 | 2.527270  | 1.626735  |
| 1  | -1.059469 | 1.510043  | 2.840669  |
| 1  | -1.458752 | 0.916083  | 1.361608  |
| 7  | -2.055563 | -0.694601 | -0.050809 |
| 1  | -2.740714 | -1.430851 | -0.217242 |
| 1  | -1.208203 | -1.140045 | 0.300904  |
| 1  | -1.801590 | -0.295952 | -0.950825 |
| 7  | -3.744471 | 1.988021  | -0.166514 |
| 1  | -4.145034 | 2.411180  | 0.663202  |
| 1  | -3.394993 | 1.065429  | 0.090622  |
| 1  | -4.505082 | 1.861077  | -0.825070 |
| 7  | 2.153428  | 1.614994  | 0.847899  |
| 1  | 1.193858  | 1.686444  | 1.183988  |
| 1  | 2.133751  | 1.151558  | -0.056112 |
| 1  | 2.506658  | 2.555164  | 0.710106  |
| 7  | -4.281335 | -3.059458 | -0.375395 |
| 1  | -4.445196 | -3.411211 | -1.311862 |
| 1  | -5.182604 | -2.798932 | 0.008352  |
| 1  | -3.934225 | -3.835133 | 0.177337  |

-----  
Cartesian coordinates of : MP2\_AM10\_33-----  
Atomic number (AN) and Cartesian coordinates

| AN | X         | Y         | Z         |
|----|-----------|-----------|-----------|
| 7  | 1.933285  | -0.361179 | 2.128606  |
| 1  | 1.748252  | -1.237351 | 1.631291  |
| 1  | 2.757295  | 0.049815  | 1.700219  |
| 1  | 2.189695  | -0.607328 | 3.079549  |
| 7  | -2.439190 | 0.212157  | -0.297995 |
| 1  | -3.412399 | 0.135948  | -0.007841 |
| 1  | -2.411624 | 0.862640  | -1.078918 |
| 1  | -1.924455 | 0.666710  | 0.456730  |
| 7  | 1.482897  | -2.841509 | 0.264703  |
| 1  | 2.110777  | -2.507903 | -0.461188 |
| 1  | 0.534873  | -2.849199 | -0.118428 |
| 1  | 1.731736  | -3.805684 | 0.458902  |
| 7  | -1.515231 | -2.742387 | -0.776710 |
| 1  | -1.701693 | -2.996735 | -1.741135 |
| 1  | -1.826338 | -1.773290 | -0.651835 |
| 1  | -2.117956 | -3.324290 | -0.204258 |
| 7  | -0.461130 | 1.685810  | 1.824368  |
| 1  | 0.293432  | 1.007610  | 1.960621  |
| 1  | -0.036106 | 2.540203  | 1.479728  |

|   |           |           |           |
|---|-----------|-----------|-----------|
| 1 | -0.839599 | 1.900403  | 2.741384  |
| 7 | 3.887139  | -0.854599 | -0.973695 |
| 1 | 4.310617  | -1.446065 | -0.266133 |
| 1 | 4.531469  | -0.830511 | -1.757043 |
| 1 | 3.840375  | 0.088456  | -0.586840 |
| 7 | -1.035611 | 2.872967  | -1.589508 |
| 1 | -0.241723 | 2.284706  | -1.349575 |
| 1 | -1.457738 | 3.189711  | -0.724782 |
| 1 | -0.690627 | 3.685772  | -2.086244 |
| 7 | 0.792731  | 0.249316  | -1.225052 |
| 1 | 1.621721  | -0.335177 | -1.317451 |
| 1 | 0.240622  | -0.143705 | -0.467053 |
| 1 | 0.234563  | 0.108488  | -2.062059 |
| 7 | 2.992116  | 2.039342  | 0.106769  |
| 1 | 2.122358  | 1.719943  | -0.322141 |
| 1 | 3.326180  | 2.837767  | -0.422368 |
| 1 | 2.772900  | 2.373895  | 1.038721  |
| 7 | -5.610794 | -0.309452 | 0.469137  |
| 1 | -6.240958 | 0.164010  | -0.167787 |
| 1 | -5.926516 | -0.106425 | 1.410400  |
| 1 | -5.722619 | -1.305676 | 0.321177  |

-----

Cartesian coordinates of :      MP2\_AM10\_34

-----

Atomic number (AN) and Cartesian coordinates

| AN | X         | Y         | Z         |
|----|-----------|-----------|-----------|
| 7  | -1.460610 | 2.364842  | -1.679376 |
| 1  | -0.440855 | 2.434712  | -1.705446 |
| 1  | -1.695892 | 1.462717  | -2.080146 |
| 1  | -1.832683 | 3.073234  | -2.303218 |
| 7  | -1.711282 | 2.376970  | 1.479548  |
| 1  | -2.312004 | 3.113255  | 1.835330  |
| 1  | -2.155708 | 1.494364  | 1.710229  |
| 1  | -1.714593 | 2.441834  | 0.458728  |
| 7  | 1.711230  | 2.376956  | -1.479590 |
| 1  | 2.155651  | 1.494337  | -1.710222 |
| 1  | 1.714543  | 2.441877  | -0.458773 |
| 1  | 2.311949  | 3.113221  | -1.835416 |
| 7  | 1.460562  | 2.364940  | 1.679329  |
| 1  | 1.695850  | 1.462815  | 2.080096  |
| 1  | 0.440807  | 2.434806  | 1.705413  |
| 1  | 1.832643  | 3.073333  | 2.303165  |
| 7  | -4.191515 | -3.329095 | -0.063170 |
| 1  | -4.006771 | -4.002580 | -0.797475 |
| 1  | -4.015608 | -3.790131 | 0.821902  |
| 1  | -5.180545 | -3.111033 | -0.098290 |
| 7  | 2.249749  | -0.665445 | 0.046163  |
| 1  | 1.561030  | -0.672698 | 0.799742  |
| 1  | 2.824588  | -1.501080 | 0.137174  |
| 1  | 2.857001  | 0.128429  | 0.220731  |
| 7  | -0.105898 | -0.627879 | 2.276584  |
| 1  | -0.233777 | -1.445605 | 2.863810  |
| 1  | -0.845010 | -0.642581 | 1.568105  |
| 1  | -0.279305 | 0.181583  | 2.863400  |
| 7  | 0.105934  | -0.627980 | -2.276569 |
| 1  | 0.233843  | -1.445730 | -2.863757 |
| 1  | 0.845054  | -0.642616 | -1.568096 |
| 1  | 0.279298  | 0.181460  | -2.863428 |
| 7  | -2.249707 | -0.665498 | -0.046149 |
| 1  | -2.856953 | 0.128378  | -0.220728 |
| 1  | -2.824551 | -1.501131 | -0.137152 |
| 1  | -1.560986 | -0.672763 | -0.799727 |
| 7  | 4.191538  | -3.329060 | 0.063227  |
| 1  | 4.015749  | -3.790034 | -0.821901 |
| 1  | 4.006667  | -4.002589 | 0.797460  |
| 1  | 5.180568  | -3.111027 | 0.098507  |

-----
